# Supplementary material for: D–A dyads and A–D–A triads based on ferrocene: push–pull dyes with unusual behaviours in solution
Source: Royal Society of Chemistry journal article supplement (doi:10.1039/d1nj01680f), 2021-01-01

## Supporting Information

# D-A Diads and A-D-A Triads based on Ferrocene: Push-pull Dyes of Unusual Behaviours in Solution

Guillaume Noirbent<sup>1,\*</sup>, Damien Brunel<sup>1,\*</sup>, Thanh-Tuân Bui<sup>2</sup>, Sébastien Péralta<sup>2</sup>, Pierre-Henry Aubert<sup>2</sup>, Didier Gigmes<sup>1</sup> and Frédéric Dumur<sup>1,\*</sup>

<sup>1</sup> Aix Marseille Univ, CNRS, ICR UMR 7273, F-13397 Marseille, France

<sup>2</sup> CY Cergy Paris Université, LPPI, F-95000 Cergy, France

\* Correspondence: [guillaume.noirbent@univ-amu.fr](mailto:guillaume.noirbent@univ-amu.fr); [damien.brunel@univ-amu.fr](mailto:damien.brunel@univ-amu.fr); [frederic.dumur@univ-amu.fr](mailto:frederic.dumur@univ-amu.fr); Tel.: +33 (0)4 91 28 90 59 (F.D.)

|                                                                                                                                  |     |
|----------------------------------------------------------------------------------------------------------------------------------|-----|
| UV-visible absorption spectra in solvents of different polarities                                                                | 2   |
| Results of the multiple linear regression analyses                                                                               | 14  |
| Results of the linear correlation analyses                                                                                       | 14  |
| Variation of the absorption maxima vs. the Kamlet–Taft parameters                                                                | 16  |
| Variation of the absorption maxima vs. the Catalan (SPP) scale                                                                   | 23  |
| Variation of the absorption maxima vs. the Catalan (SdP) scale                                                                   | 24  |
| Kinetics of chemical discoloration                                                                                               | 29  |
| Cyclic voltammograms of the push pull compounds                                                                                  | 41  |
| Contour plots of the HOMO and LUMO energy levels of dyes                                                                         | 52  |
| Energy levels of diads and triads                                                                                                | 65  |
| Simulated absorption spectra                                                                                                     | 66  |
| Cartesian coordinates of the optimized structures                                                                                | 89  |
| Modification of the UV-visible absorption spectra of <b>DA0-DA11</b> and <b>ADA0-ADA11</b> in DMSO at room temperature over time | 113 |
| Modification of the UV-visible absorption spectra of <b>A-D-A0</b> in different solvents                                         | 125 |
| <sup>1</sup> H and <sup>13</sup> C NMR spectra of the different dyes                                                             | 133 |

## UV-visible absorption spectra of the different dyes recorded in solvents of different polarities.

Solvatochromism of **D-A0** in solvents of different polarities.

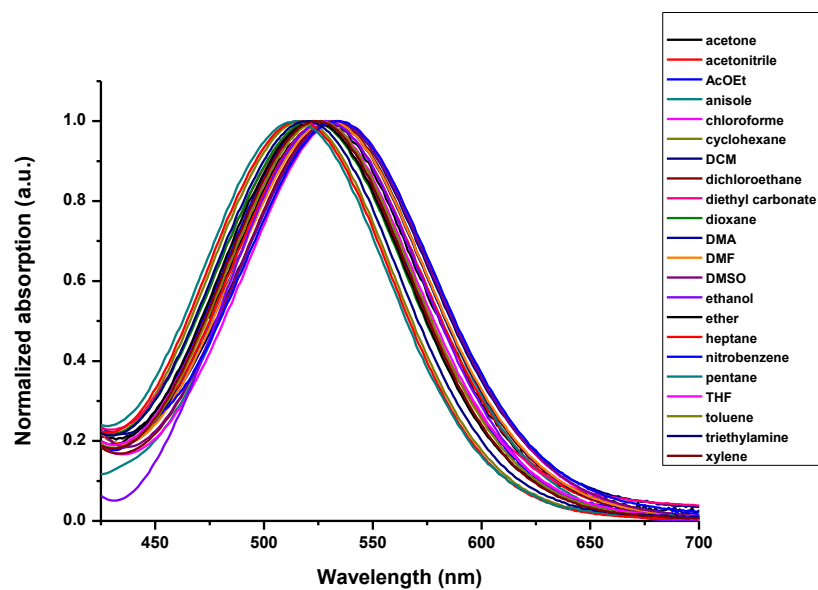

Solvatochromism of **D-A1** in solvents of different polarities.

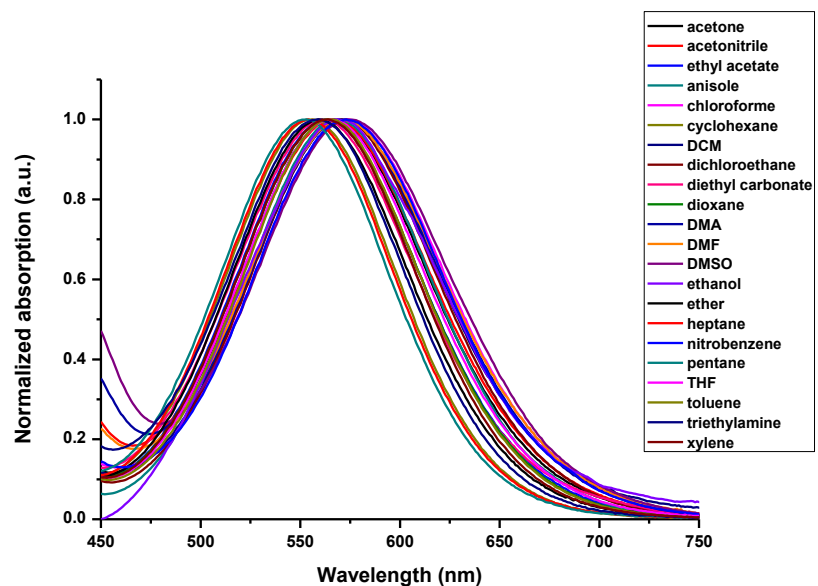

Solvatochromism of **D-A2** in solvents of different polarities.

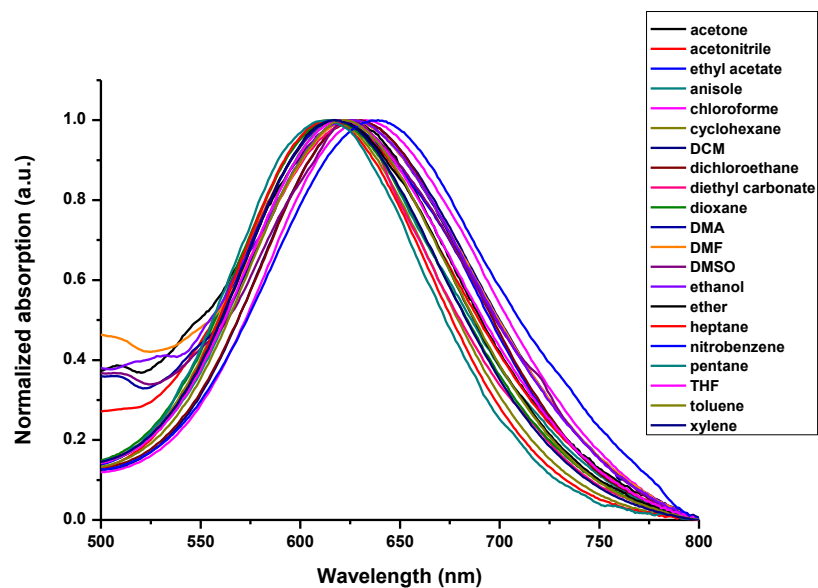

Solvatochromism of **D-A3** in solvents of different polarities.

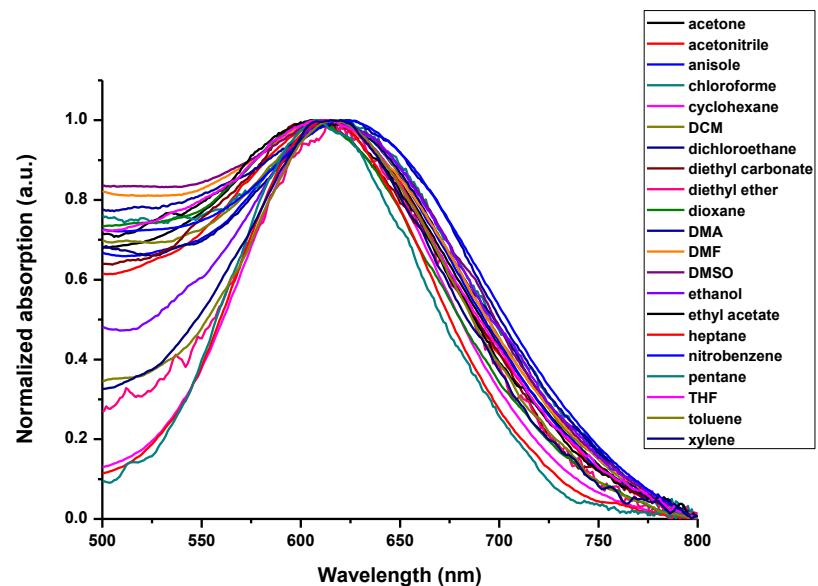

Solvatochromism of **D-A4** in solvents of different polarities.

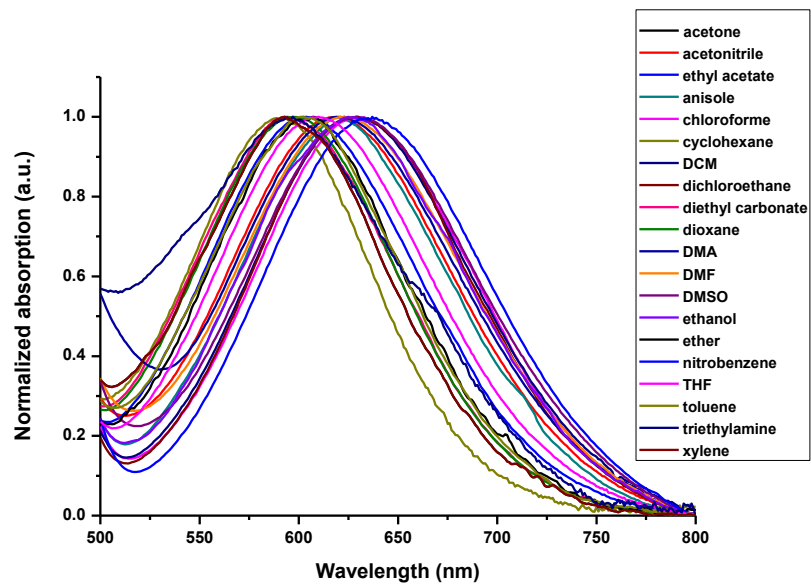

Solvatochromism of **D-A5** in solvents of different polarities.

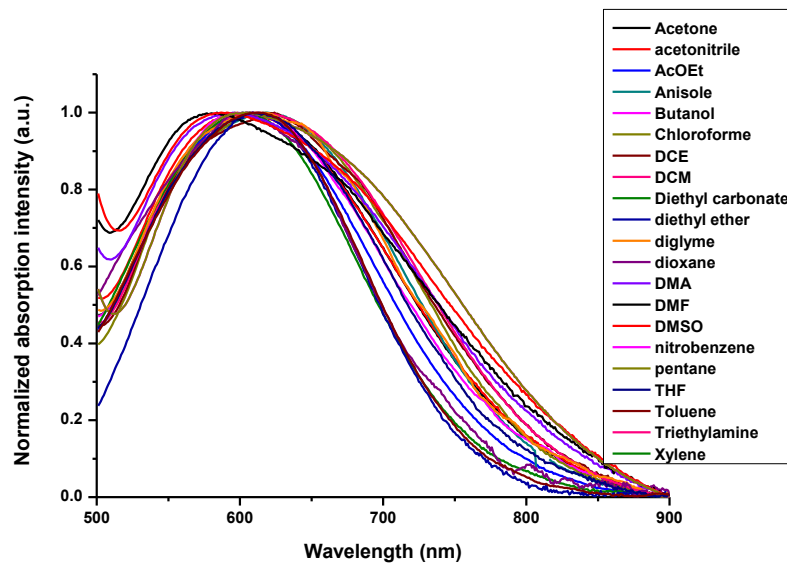



Solvatochromism of **D-A6** in solvents of different polarities.

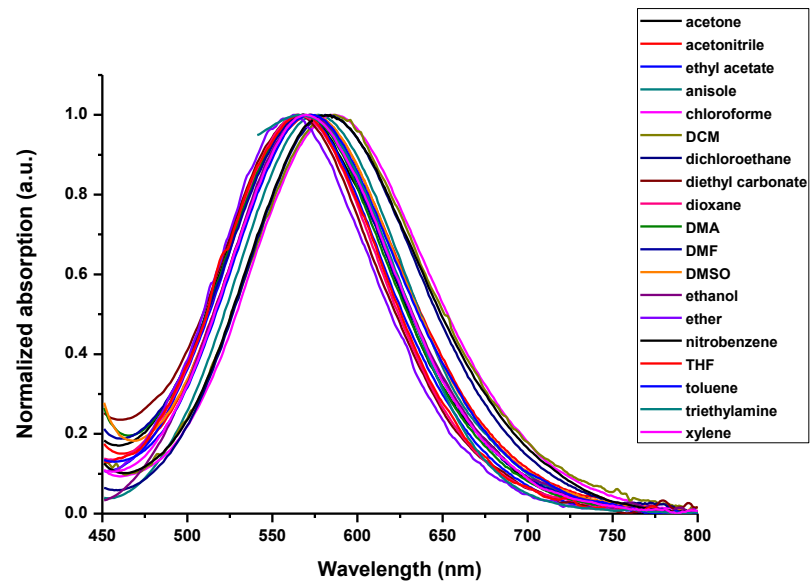

Solvatochromism of **D-A7** in solvents of different polarities.

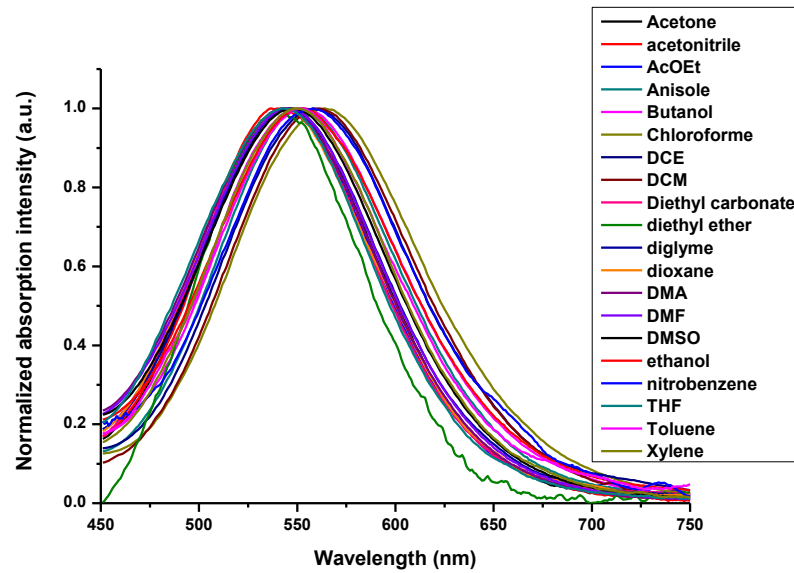

Solvatochromism of **D-A8** in solvents of different polarities.

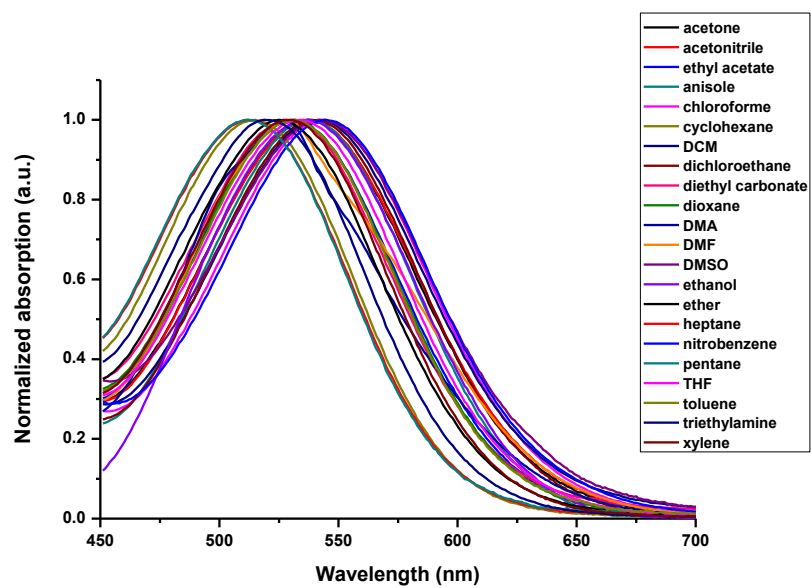

Solvatochromism of **D-A9** in solvents of different polarities.

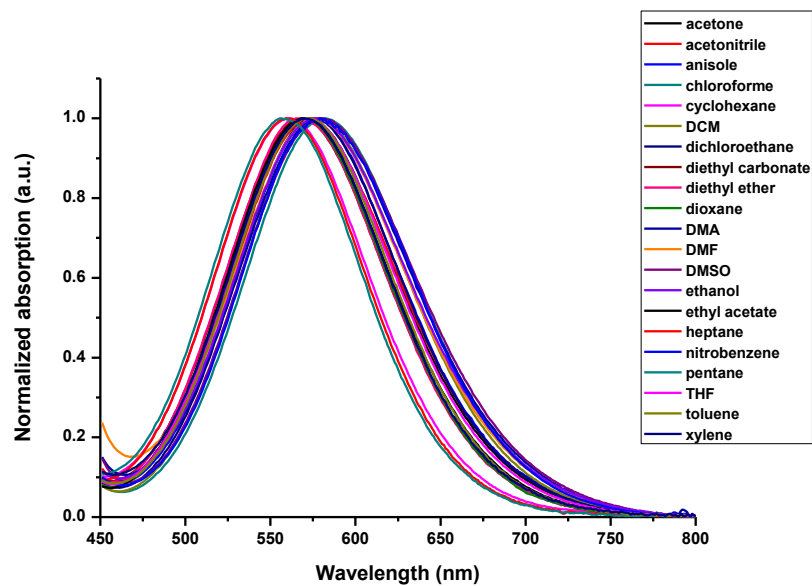

Solvatochromism of D-A10 in solvents of different polarities.

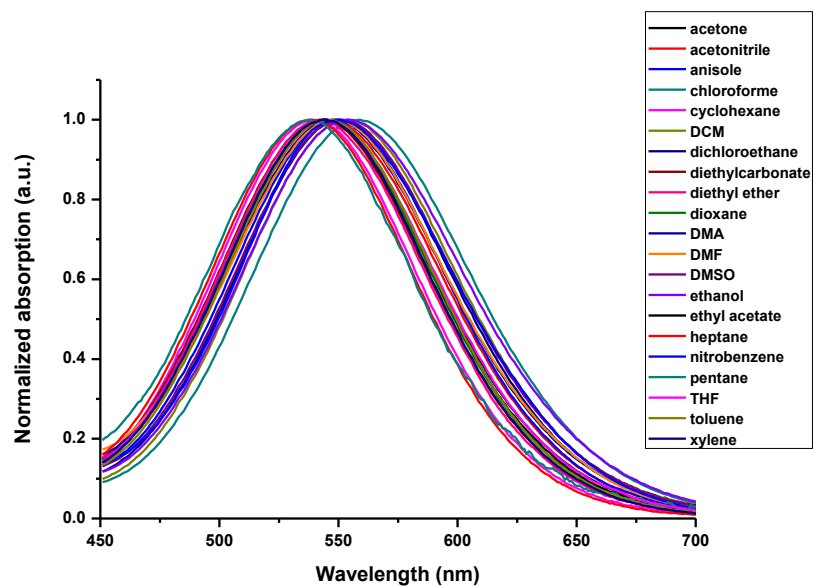

Solvatochromism of D-A11 in solvents of different polarities.

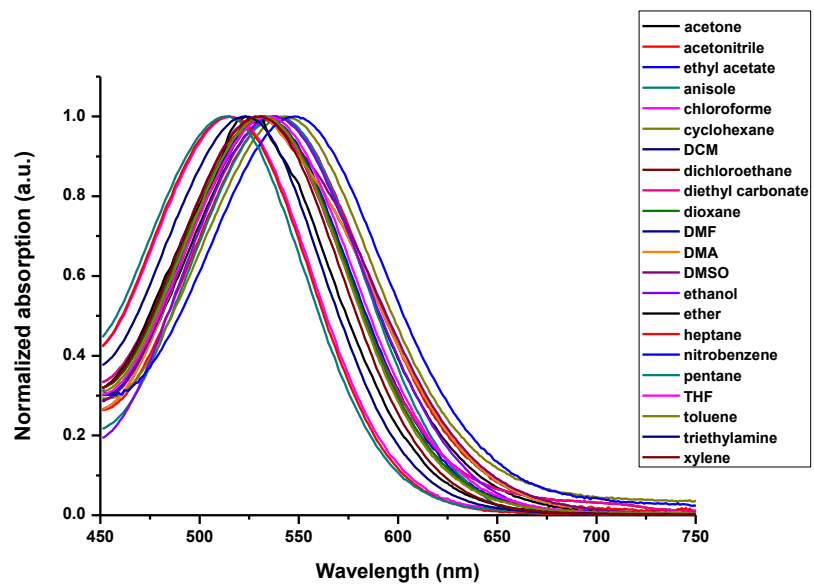

Solvatochromism of A-D-A0 in solvents of different polarities.

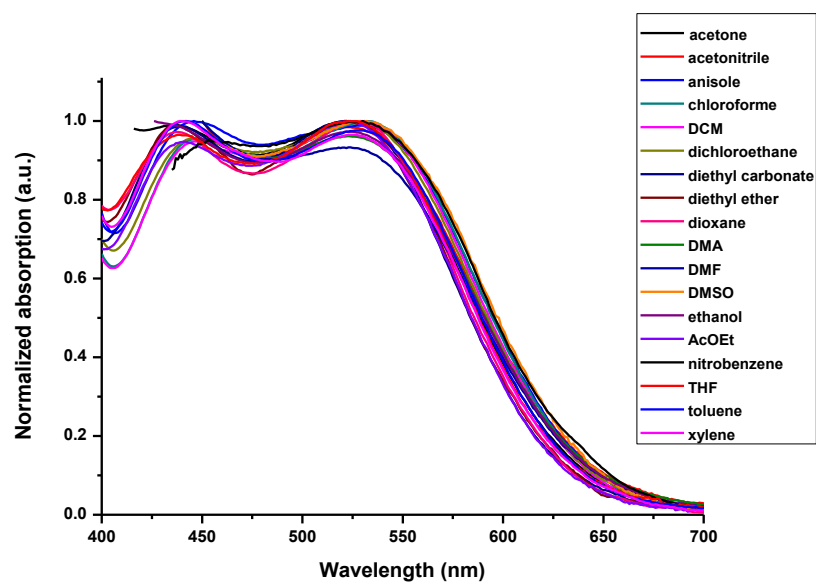

Solvatochromism of A-D-A1 in solvents of different polarities.

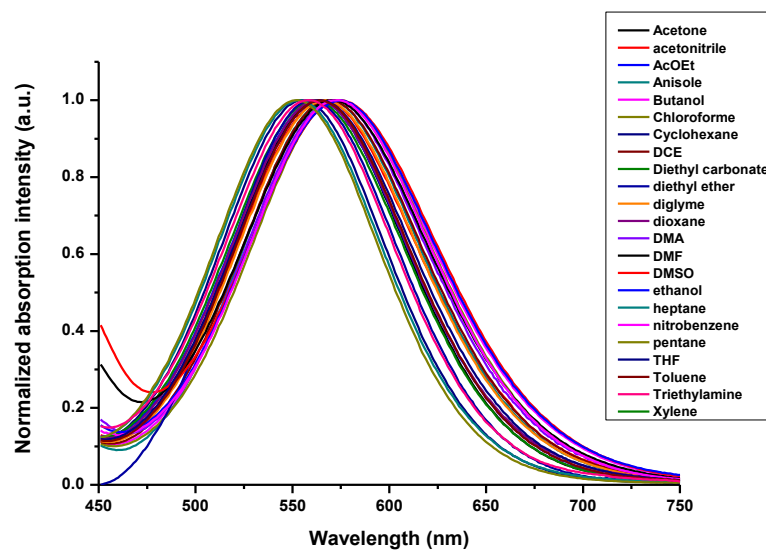

Solvatochromism of A-D-A2 in solvents of different polarities.

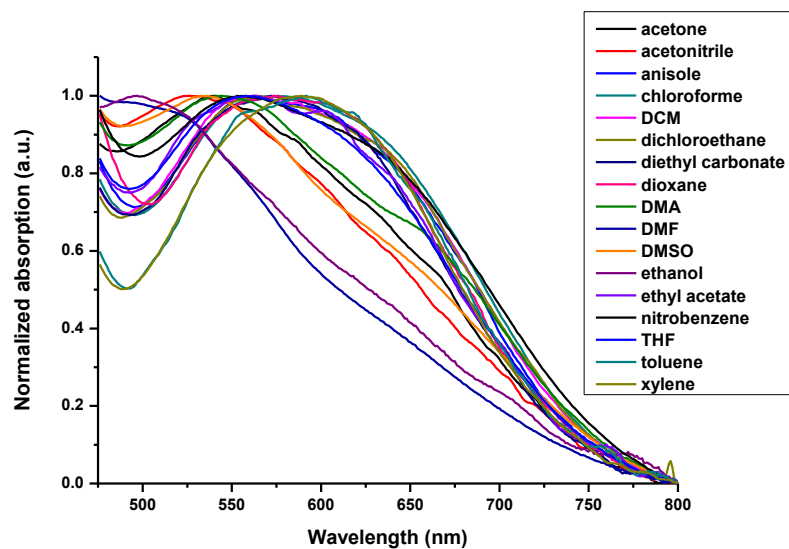

Solvatochromism of A-D-A3 in solvents of different polarities.

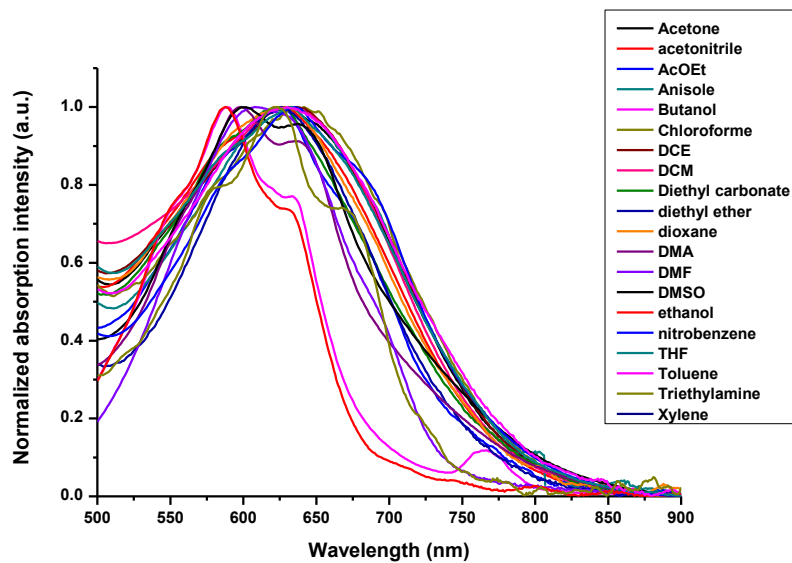

Solvatochromism of **A-D-A4** in solvents of different polarities.

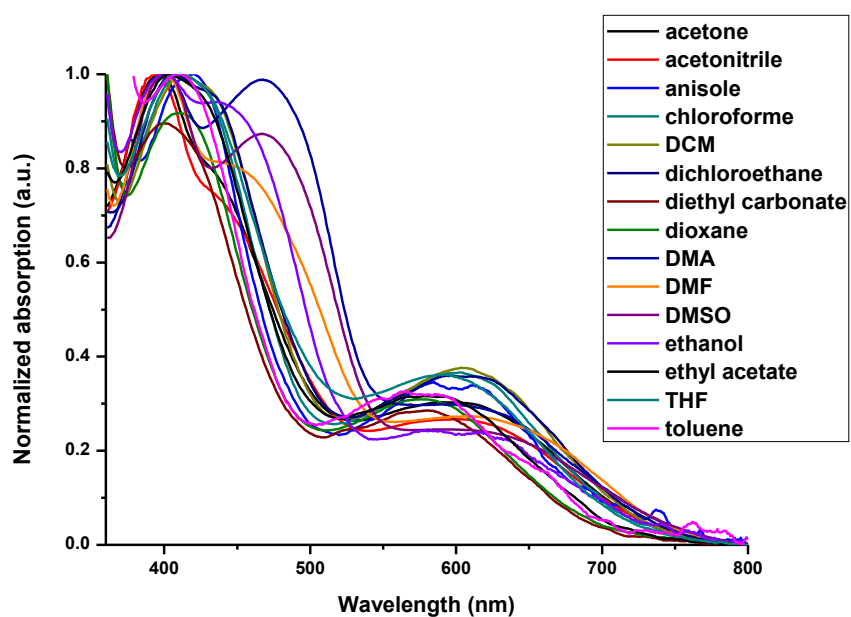

Solvatochromism of **A-D-A5** in solvents of different polarities.

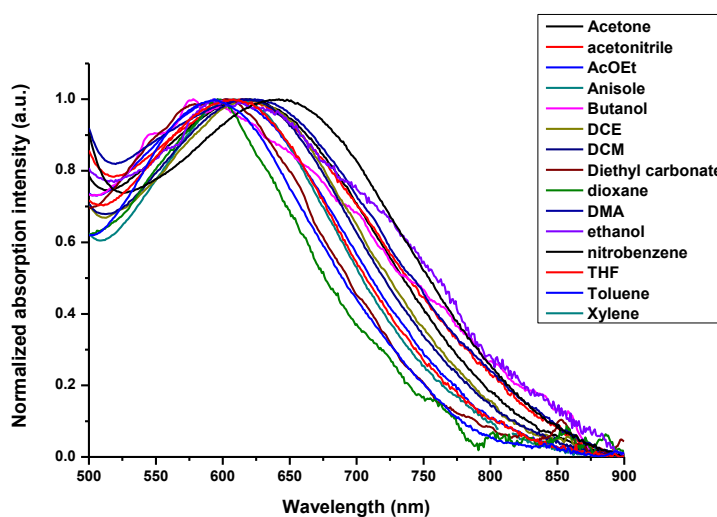

Solvatochromism of **A-D-A6** in solvents of different polarities.

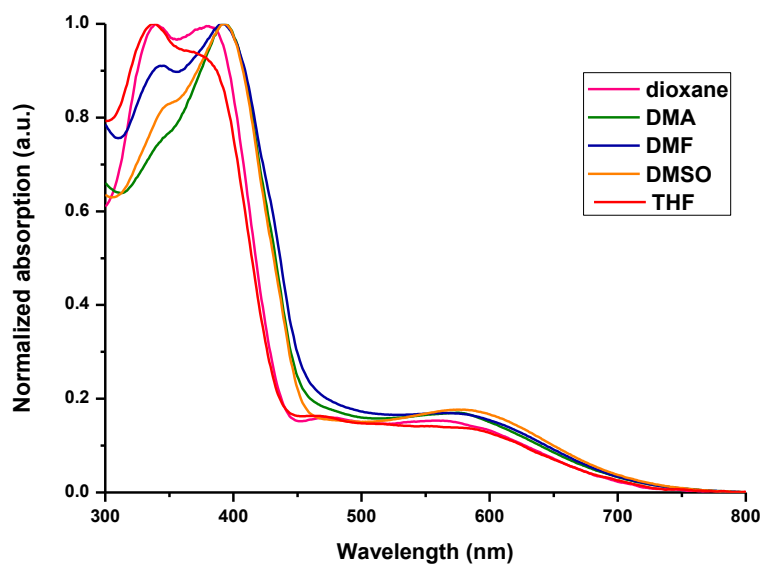

Solvatochromism of A-D-A7 in solvents of different polarities.

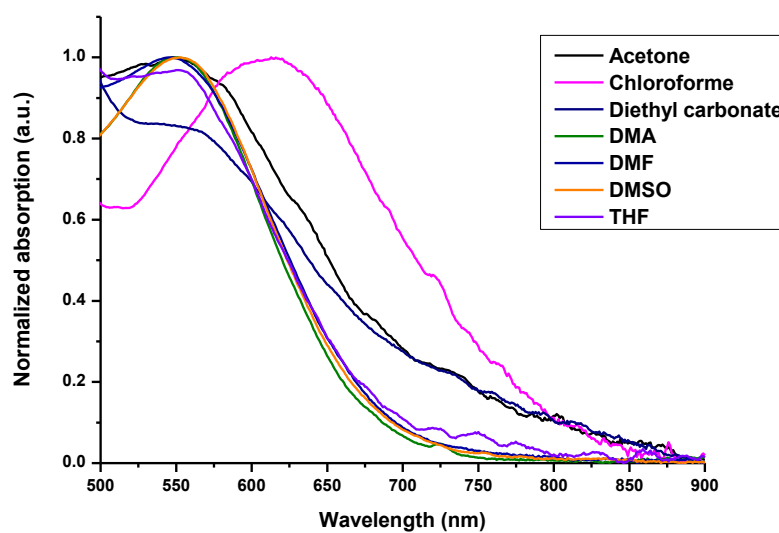

Solvatochromism of A-D-A8 in solvents of different polarities.

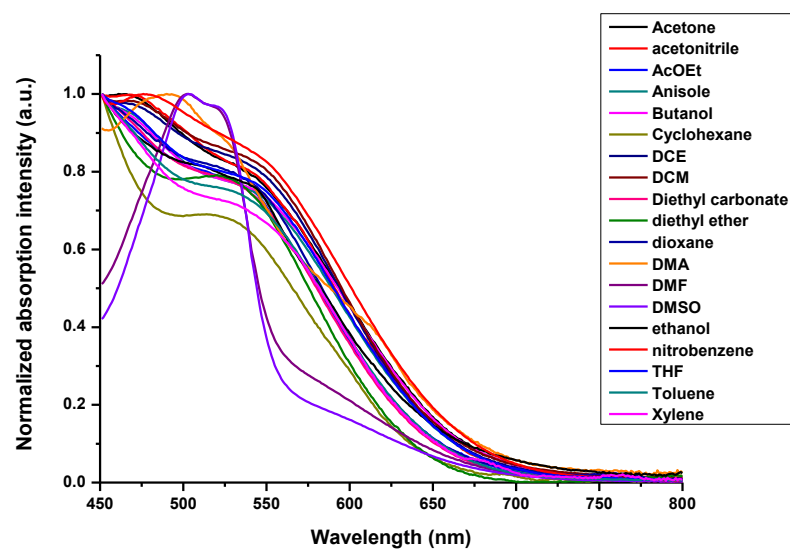

Solvatochromism of **A-D-A9** in solvents of different polarities.

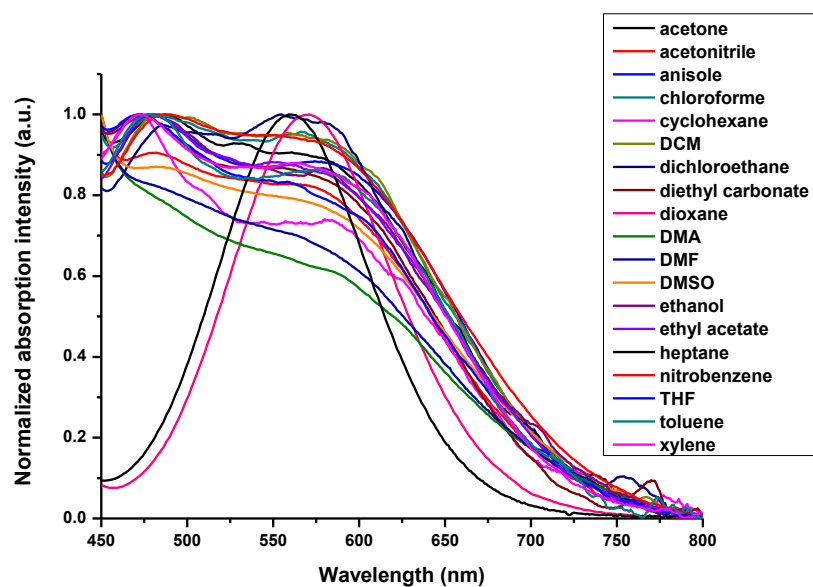

Solvatochromism of **A-D-A10** in solvents of different polarities.



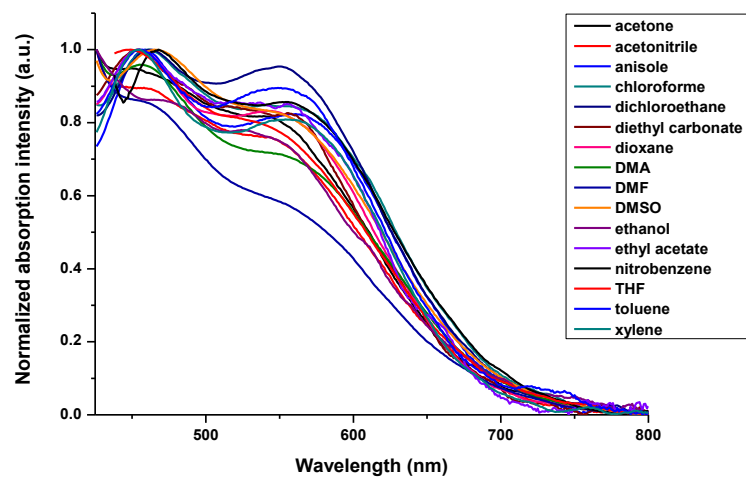

Solvatochromism of A-D-A11 in solvents of different polarities.

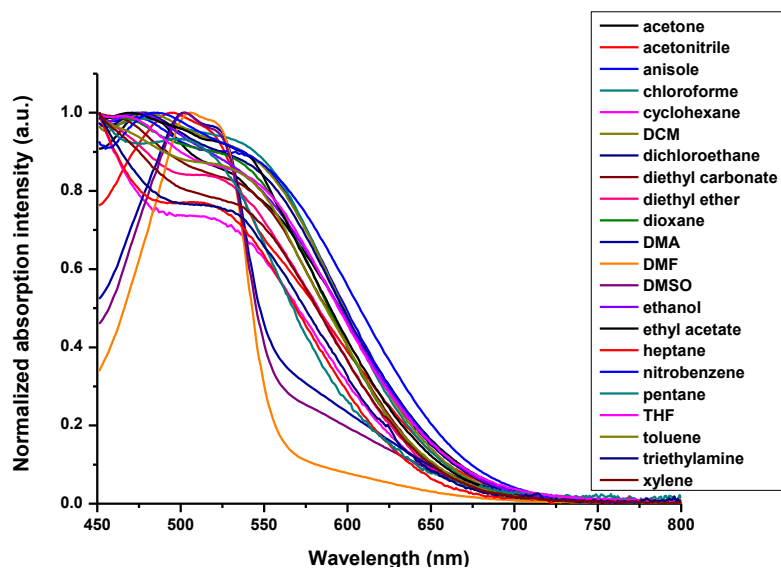

## Results of the multiple linear regression analyses

The position of the UV/Vis absorption maxima with regard to the dipolarity/polarizability  $\pi^*$  and the hydrogen bonding capacity ( $\alpha$  and  $\beta$ ) of the solvent can be interpreted using the Kamlet–Taft equation :

$$V_{\max}(\text{cm}^{-1}) = V_{\max,0}(\text{cm}^{-1}) + a\alpha + b\beta + s\pi^*$$

**Table S1.** Solvent-independent correlation coefficients  $a$ ,  $b$  and  $s$  of the Kamlet-Taft parameters  $\alpha$ ,  $\beta$  and  $\pi^*$  respectively, correlation coefficient ( $R$ ), significance ( $F$ ), standard deviation ( $SD$ ), and number of solvents ( $n$ ) calculated for the solvatochromism.

| Compounds    | $V_{\max,0}$          | $a$         | $b$         | $s$        | $n$ | $F$                    | $R^2$ | $SD$     |
|--------------|-----------------------|-------------|-------------|------------|-----|------------------------|-------|----------|
| <b>D-A0</b>  | 19397.985             | -152.220    | 14.752      | -615.842   | 22  | 2.16 <sup>E-8</sup>    | 0.876 | 83.76    |
| <b>D-A1</b>  | 18065.274             | -145.299    | -54.148     | -584.088   | 22  | 2.905 <sup>E-11</sup>  | 0.941 | 55.10    |
| <b>D-A2</b>  | 16335.463             | -141.341    | 119.959     | -472.699   | 22  | 4.746 <sup>E-4</sup>   | 0.640 | 117.08   |
| <b>D-A3</b>  | 16359.532             | 174.111     | 141.007     | -161.85    | 22  | 0.273                  | 0.199 | 141.48   |
| <b>D-A4</b>  | 17075.671             | -583.742    | 37.301      | -1144.067  | 22  | 1.344 <sup>E-6</sup>   | 0.822 | 187.01   |
| <b>D-A5</b>  | 5.10634 <sup>E6</sup> | -451512.60  | -329497.42  | -112394.43 | 22  | 1.93298 <sup>E-4</sup> | 0.745 | 60287.28 |
| <b>D-A6</b>  | 18271.698             | -1558.188   | -297.845    | -748.356   | 22  | 0.00305                | 0.570 | 298.39   |
| <b>D-A7</b>  | 4.37842 <sup>E6</sup> | -269114.210 | -229795.710 | 205991.17  | 22  | 9.56595 <sup>E-4</sup> | 0.704 | 37578.50 |
| <b>D-A8</b>  | 19302.557             | -651.297    | 373.900     | -871.147   | 22  | 3.929 <sup>E-6</sup>   | 0.779 | 170.45   |
| <b>D-A9</b>  | 17778.037             | -258.40     | 341.029     | -602.977   | 22  | 0.00606                | 0.529 | 169.71   |
| <b>D-A10</b> | 18549.04              | -610.744    | -262.648    | -217.354   | 22  | 0.07316                | 0.328 | 208.07   |
| <b>D-A11</b> | 19258.929             | -472.581    | 315.295     | -872.447   | 22  | 3.555 <sup>E-6</sup>   | 0.782 | 163.25   |

## Results of the linear correlation analyses

The position of the UV/Vis absorption maxima with regard to the dipolarity/polarizability  $\pi^*$  can be interpreted using a simplified version of the Kamlet–Taft equation :

$$V_{\max}(\text{cm}^{-1}) = V_{\max,0}(\text{cm}^{-1}) + s\pi^*$$

**Table S2.** Solvent-independent correlation coefficient  $s$  of the Kamlet-Taft parameters  $\pi^*$ 

| Compounds    | $s$      | $V_{\max,0}$ | $R^2$ |
|--------------|----------|--------------|-------|
| <b>D-A0</b>  | -0.07269 | 2.40062      | 0.878 |
| <b>D-A1</b>  | -0.07363 | 2.23715      | 0.894 |
| <b>D-A2</b>  | -0.05404 | 2.02674      | 0.523 |
| <b>D-A3</b>  | -0.02134 | 2.02604      | 0.073 |
| <b>D-A4</b>  | -0.14885 | 2.11821      | 0.826 |
| <b>D-A5</b>  | 0.10006  | 1.98072      | 0.278 |
| <b>D-A6</b>  | -0.08202 | 2.22742      | 0.307 |
| <b>D-A7</b>  | -0.06049 | 2.30174      | 0.102 |
| <b>D-A8</b>  | -0.13460 | 2.40843      | 0.926 |
| <b>D-A9</b>  | -0.07534 | 2.21322      | 0.794 |
| <b>D-A10</b> | -0.04924 | 2.30534      | 0.821 |
| <b>D-A11</b> | -0.13447 | 2.400346     | 0.950 |

Position of the absorption maxima of dyes in 22 solvents of different polarities vs. the Kamlet-Taft parameters  $\pi^*$

Compound D-A0

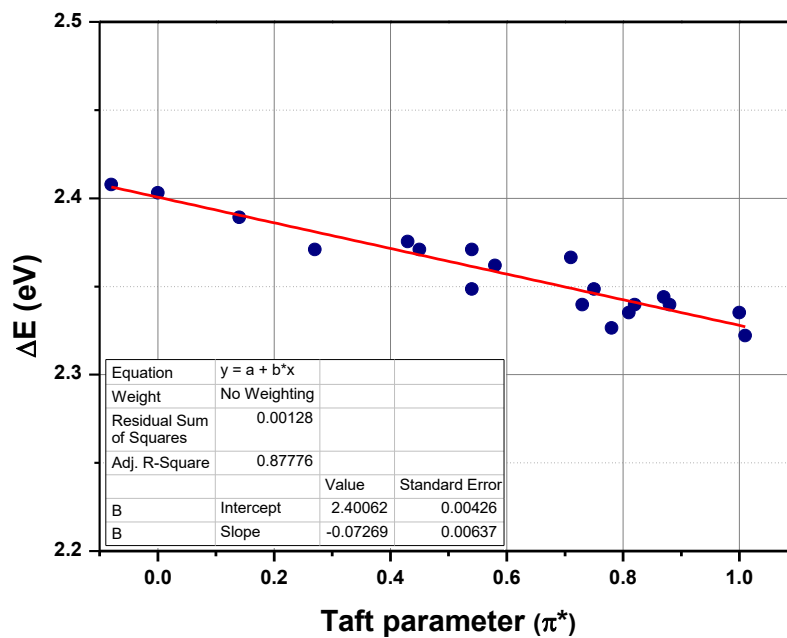

Compound D-A1

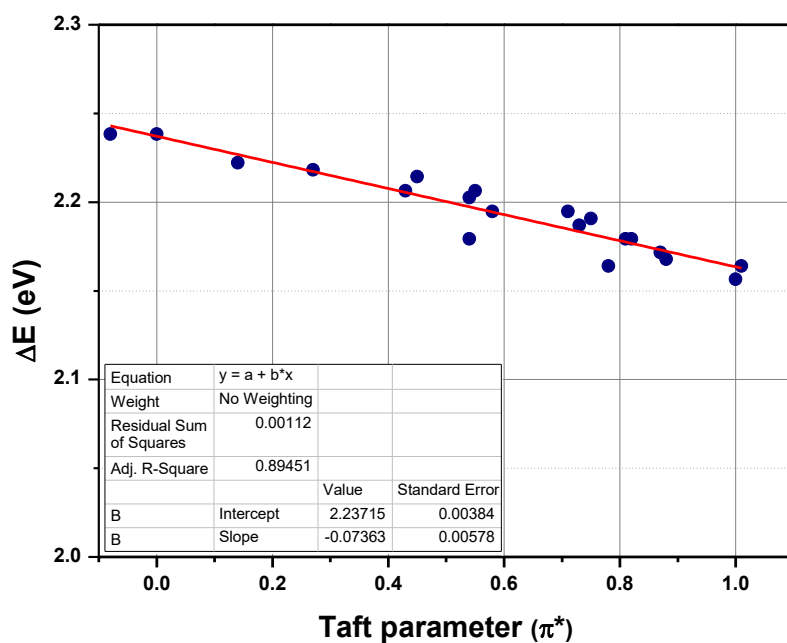

Compound D-A2

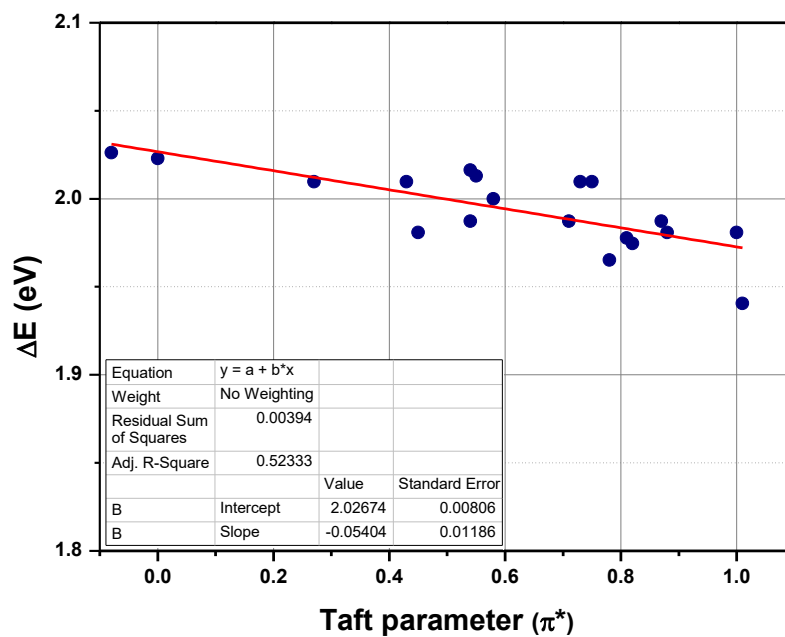

Compound D-A3

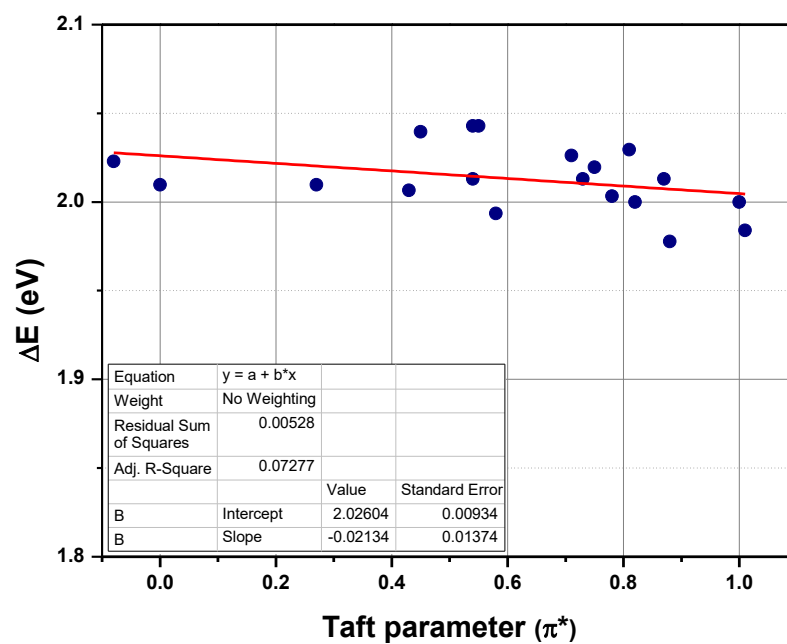

### Compound D-A4

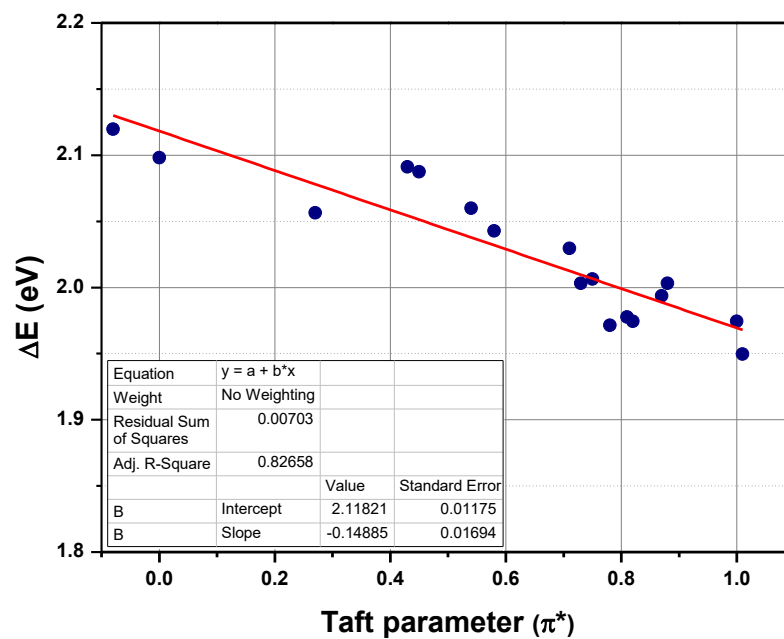

### Compound D-A5

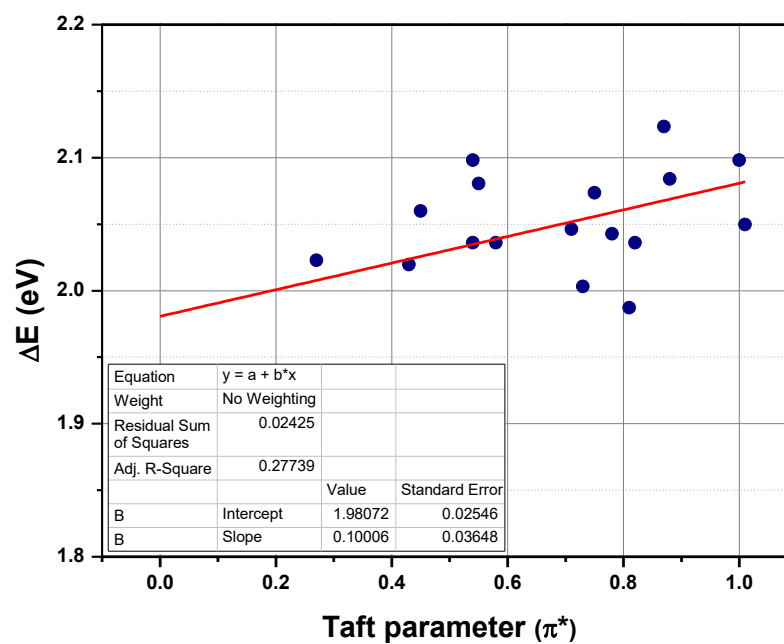

Compound D-A6

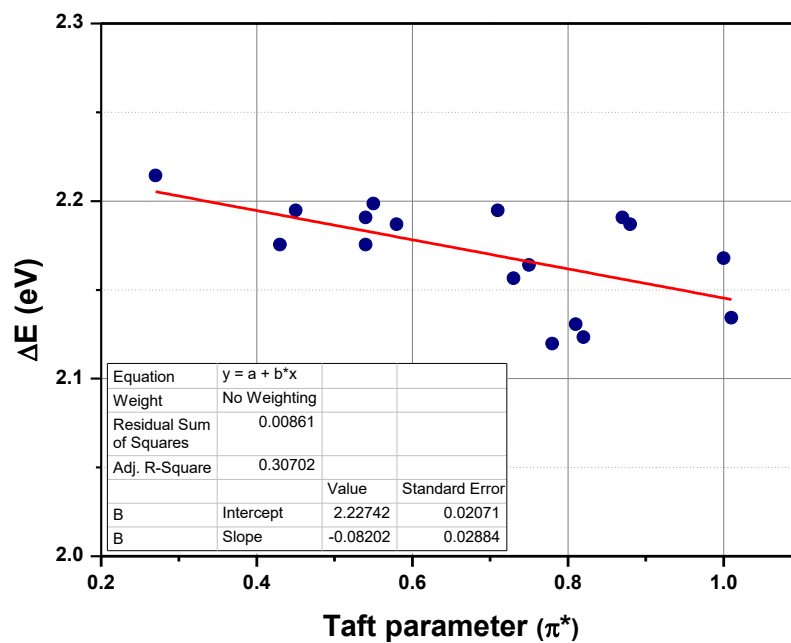

Compound D-A7

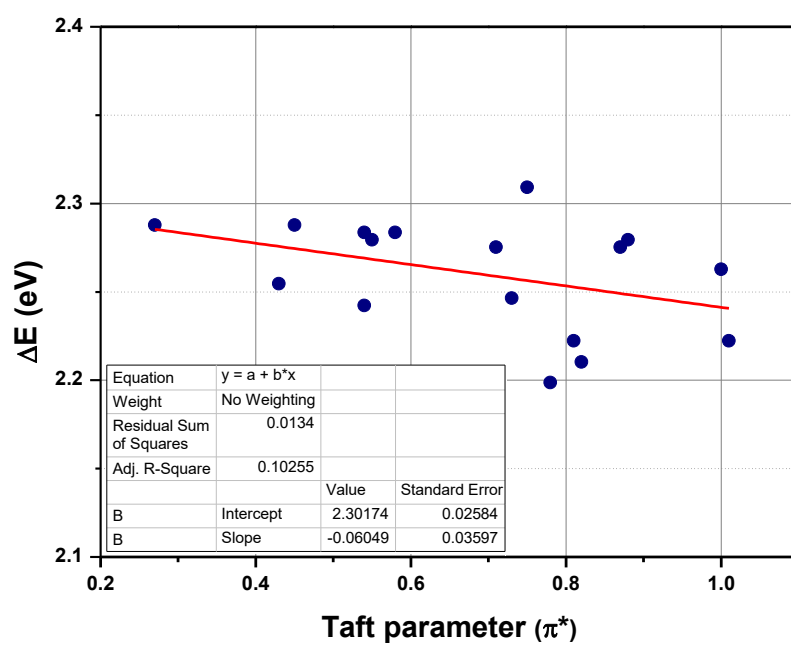

Compound D-A8

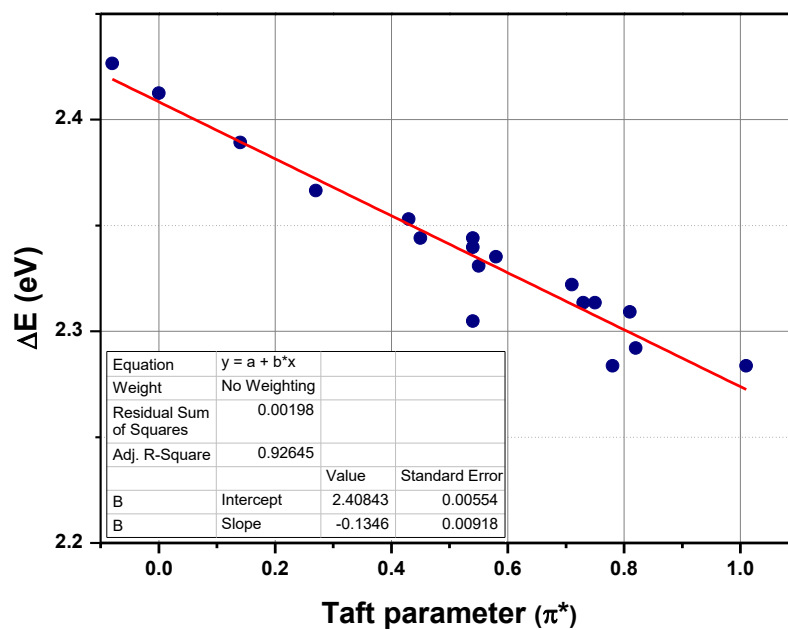

Compound D-A9

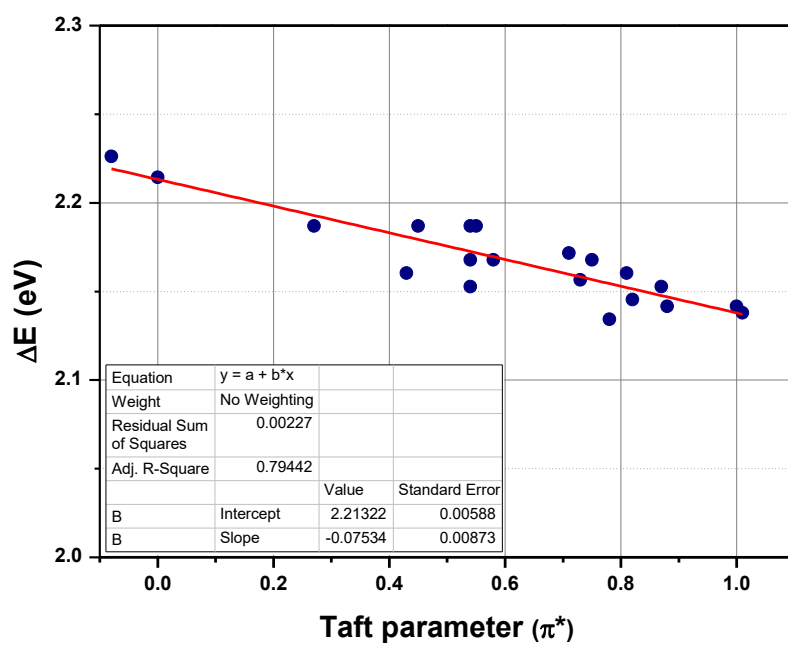



Compound D-A10

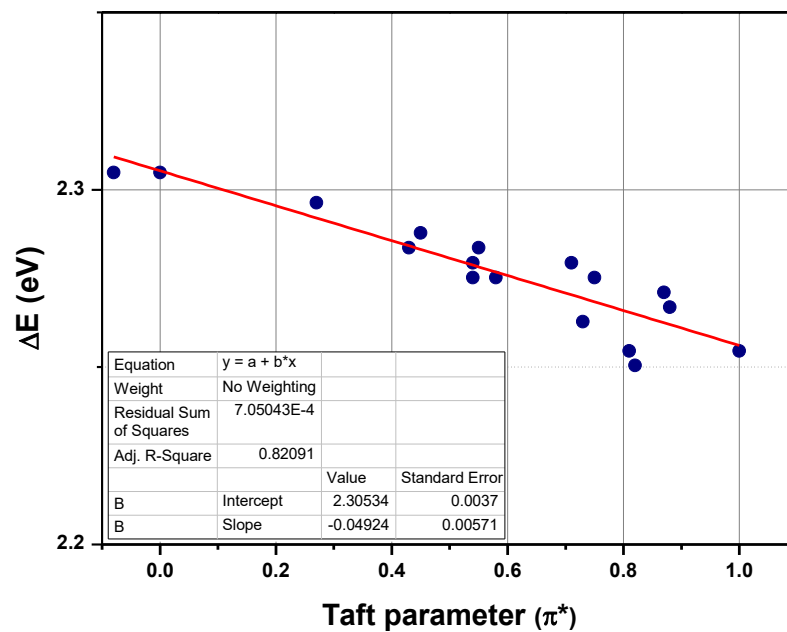

Compound D-A11

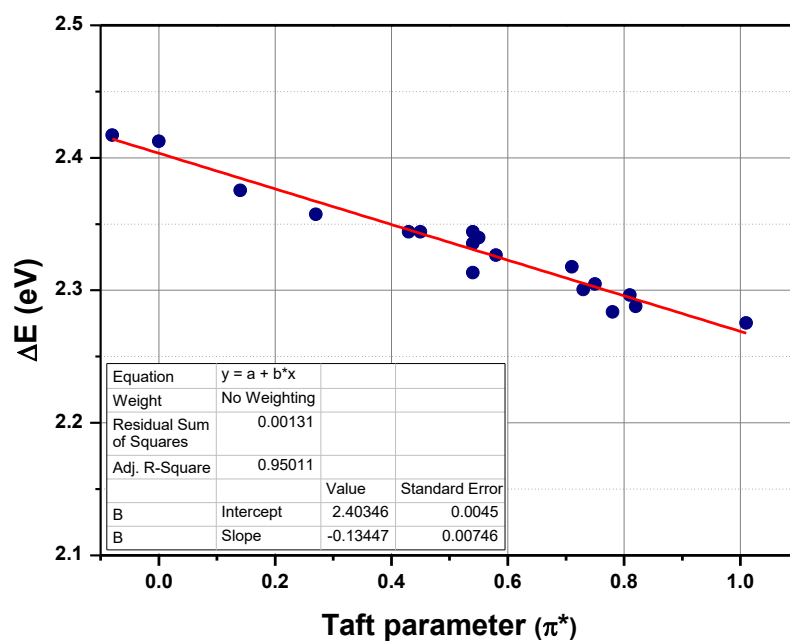

### Results of the linear correlation analyses

The position of the UV/Vis absorption maxima with regard to the dipolarity/polarizability  $\pi^*$  can also be interpreted using a Catalan parameters, namely, the solvent dipolarity (SdP) and the solvent polarity/polarizability (SPP) using the following equations :

$$\nu_{\max} (\text{cm}^{-1}) = \nu_{\max,02} (\text{cm}^{-1}) + b \times \text{SPP}$$

**Table S3.** Solvent-independent correlation coefficients a and b of the Catalan parameters SdP and SPP.

| Compounds    | $\nu_{\max,02}$ | b      | R <sup>2</sup> |
|--------------|-----------------|--------|----------------|
| <b>D-A0</b>  | 2.4865          | -0.157 | 0.887          |
| <b>D-A1</b>  | 2.3285          | -0.165 | 0.940          |
| <b>D-A2</b>  | 2.0749          | -0.099 | 0.821          |
| <b>D-A3</b>  | 2.052           | -0.048 | 0.092          |
| <b>D-A4</b>  | 2.2856          | -0.316 | 0.817          |
| <b>D-A5</b>  | 1.8327          | 0.2513 | 0.046          |
| <b>D-A6</b>  | 2.2418          | -0.080 | 0.081          |
| <b>D-A7</b>  | 2.3053          | -0.053 | 0.071          |
| <b>D-A8</b>  | 2.5457          | -0.270 | 0.809          |
| <b>D-A9</b>  | 2.3121          | -0.172 | 0.900          |
| <b>D-A10</b> | 2.3476          | -0.089 | 0.646          |
| <b>D-A11</b> | 2.5440          | -0.274 | 0.860          |

Position of the absorption maxima of dyes in 22 solvents of different polarities vs. the Catalan parameter SPP

Compound D-A0

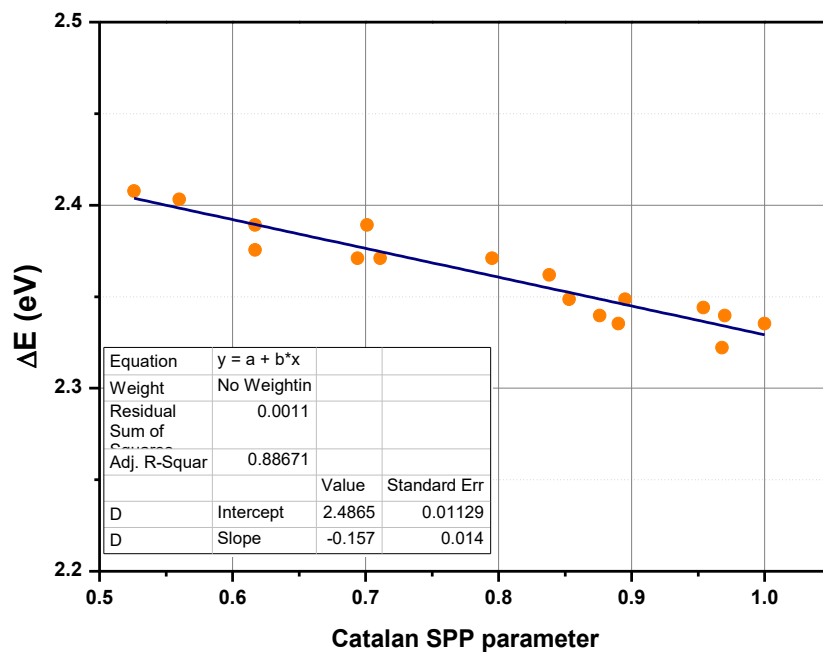

Compound D-A1

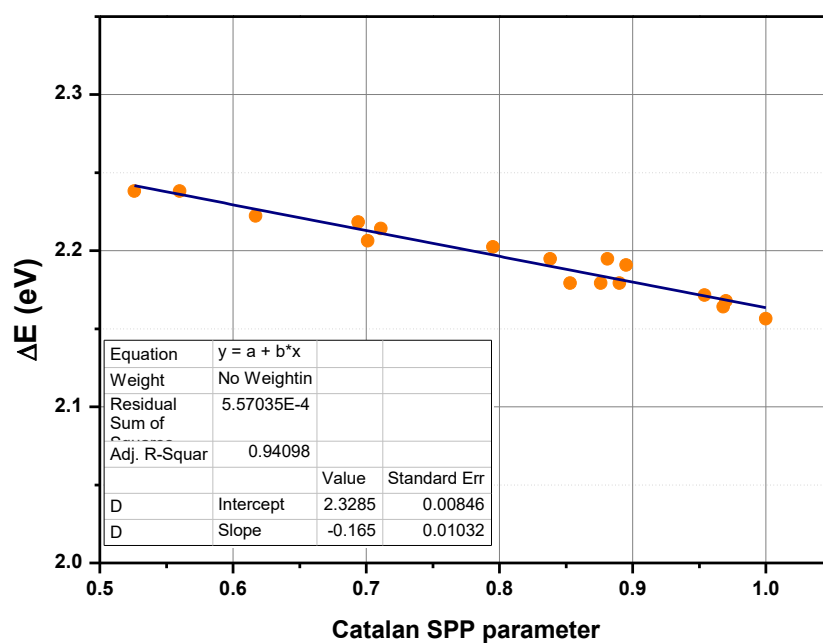

### Compound D-A2

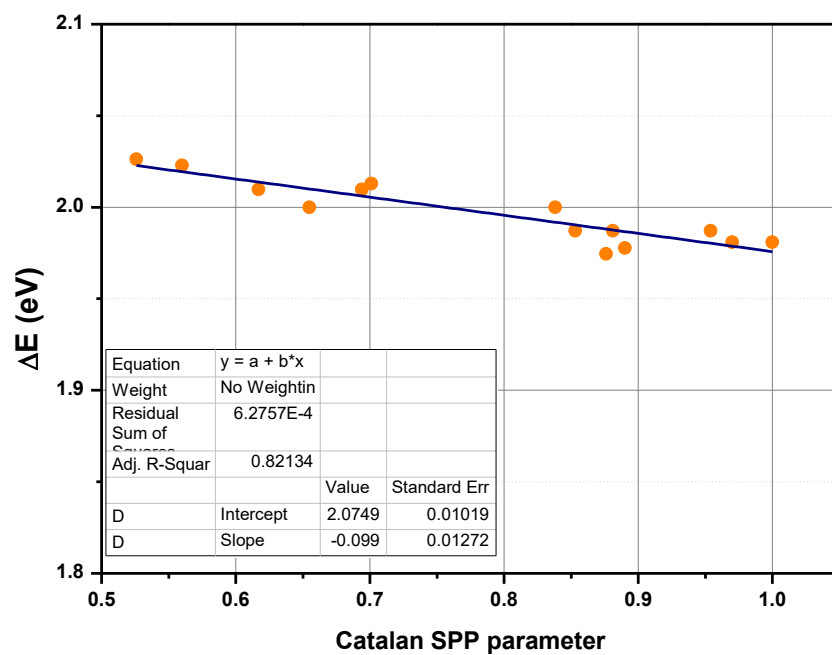

### Compound D-A3

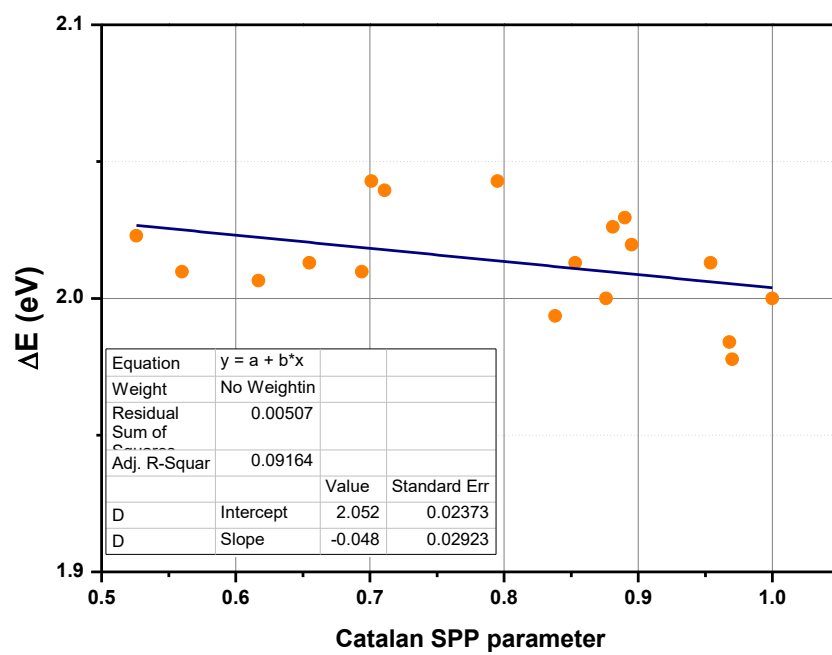

### Compound D-A4

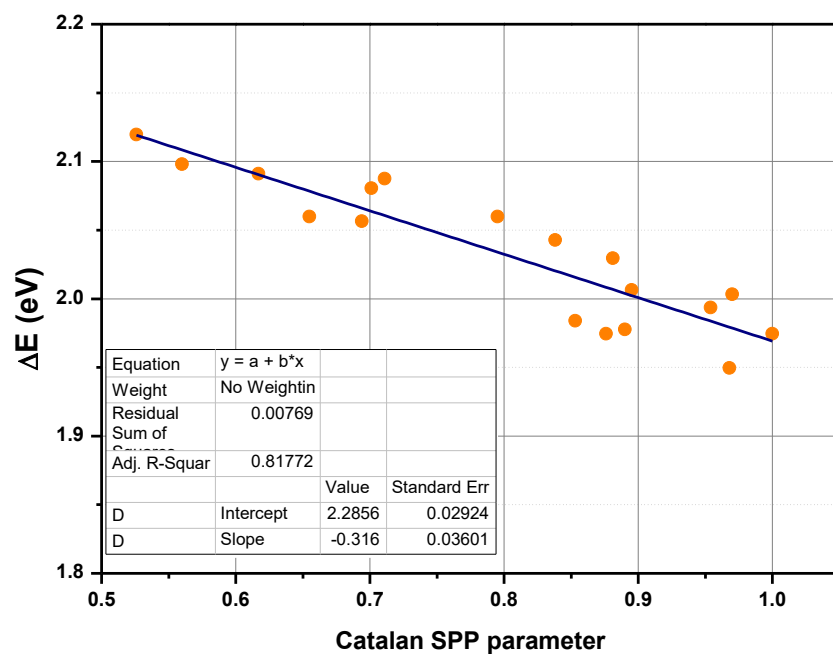

### Compound D-A5

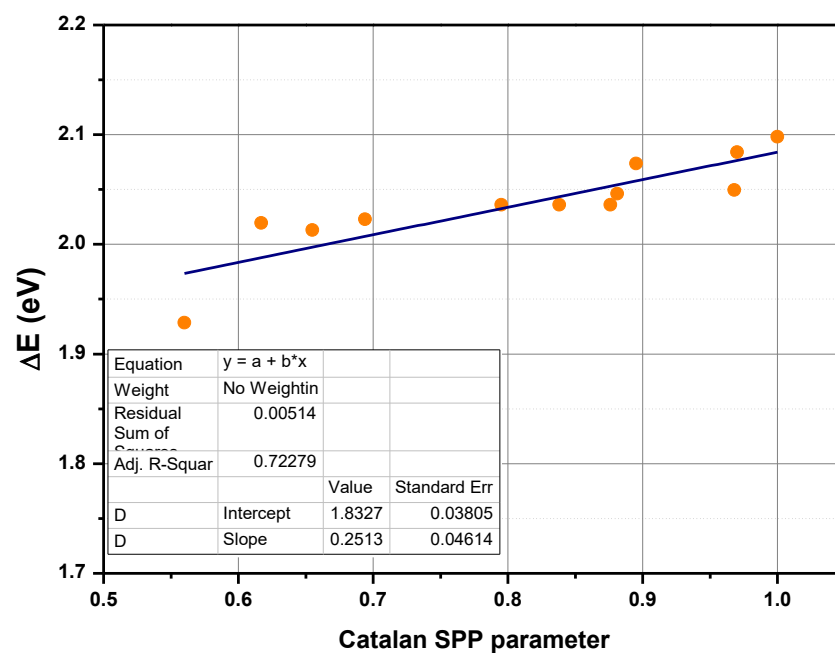

Compound D-A6

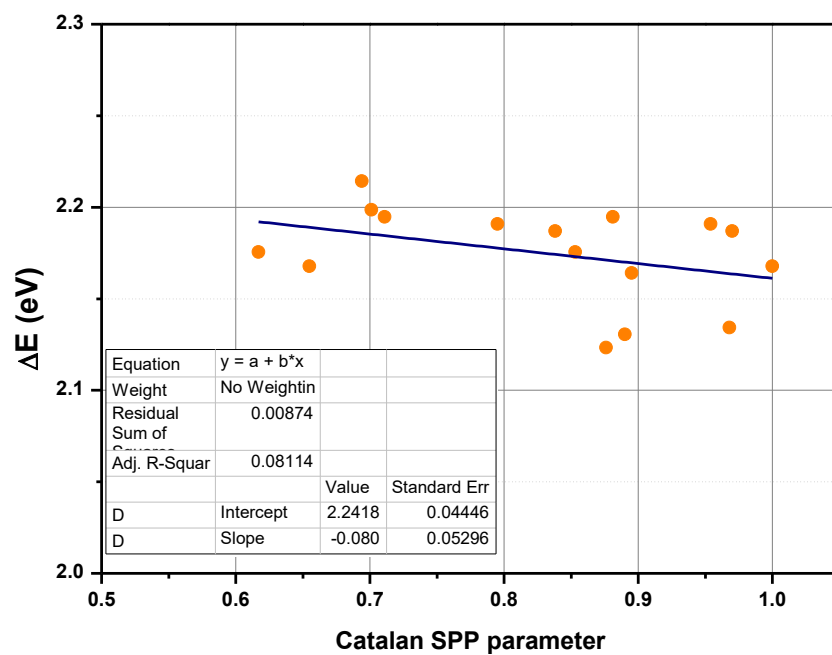

Compound D-A7

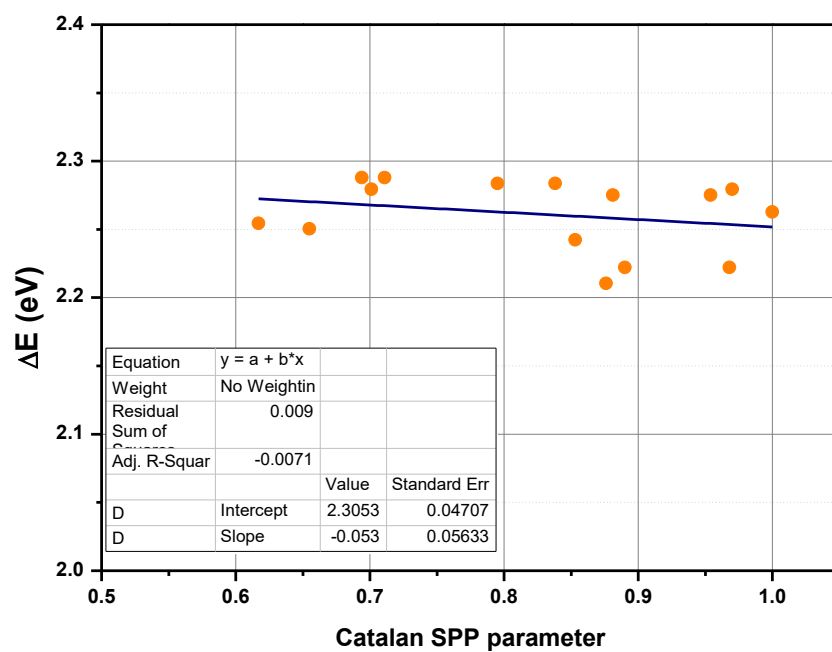

Compound D-A8

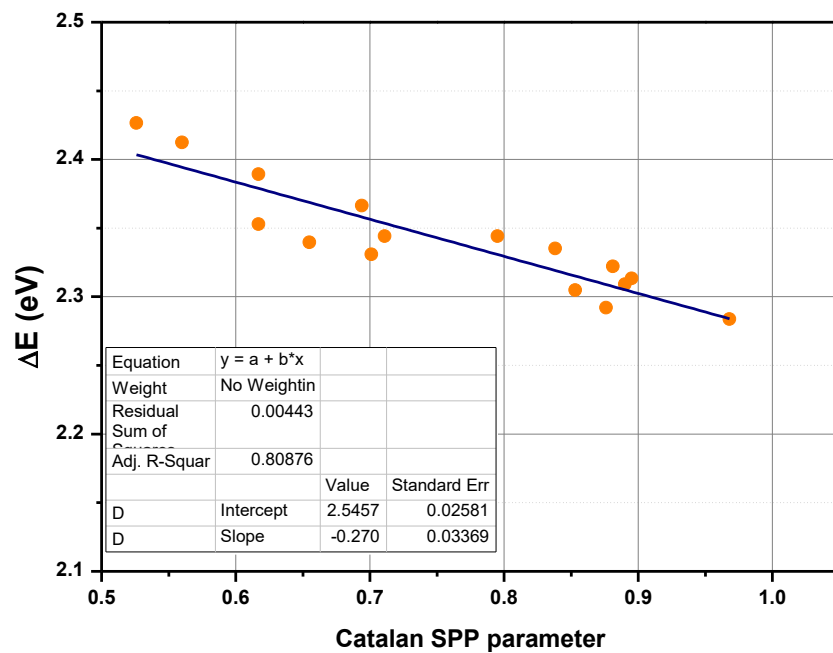

Compound D-A9

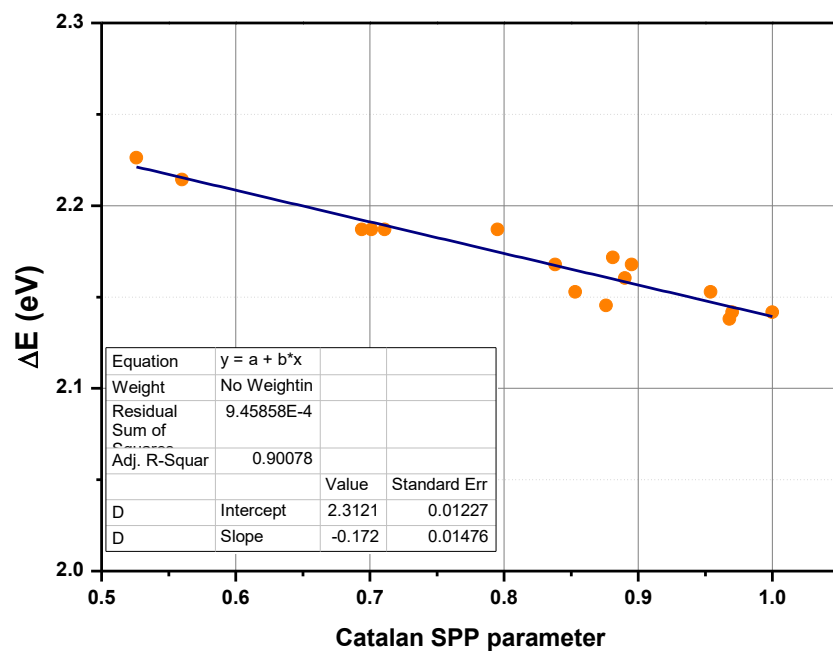

### Compound D-A10

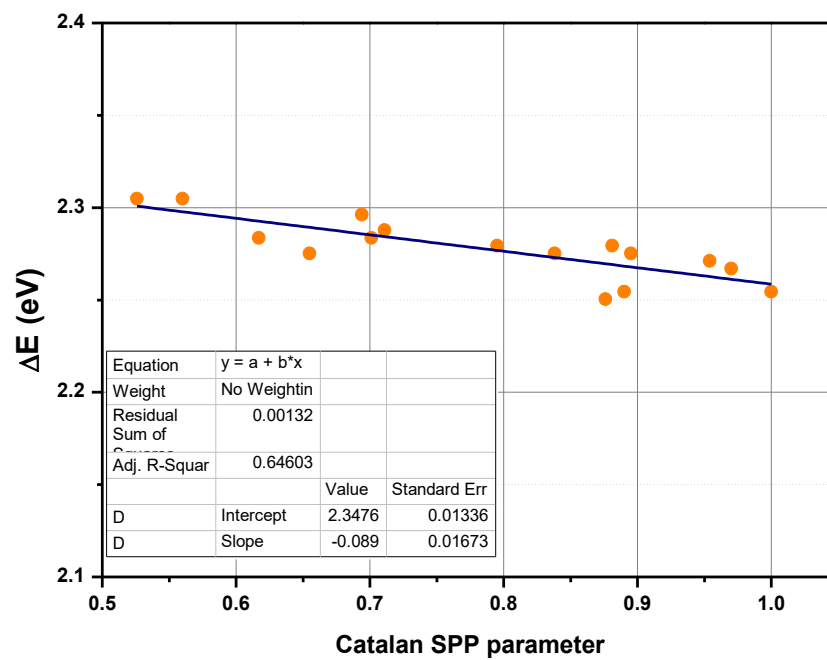

### Compound D-A11

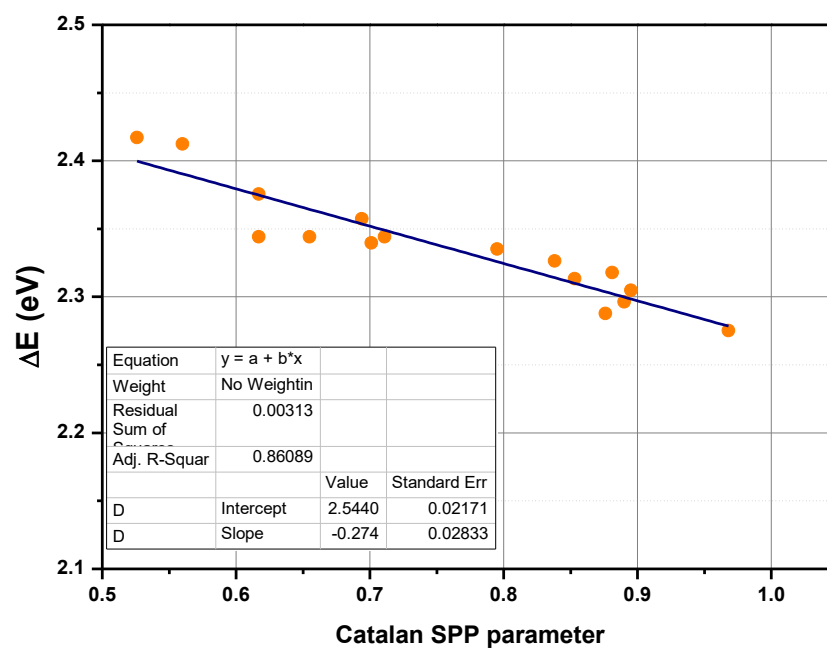



UV-visible absorption spectra of dyes recorded during the kinetics of discoloration in dichloromethane while using nitrosonium cation as the oxidizing agent.

UV-visible absorption spectra presented in the following figures have been recorded with a delay of 1 minute between each spectrum.

Compound D-A0

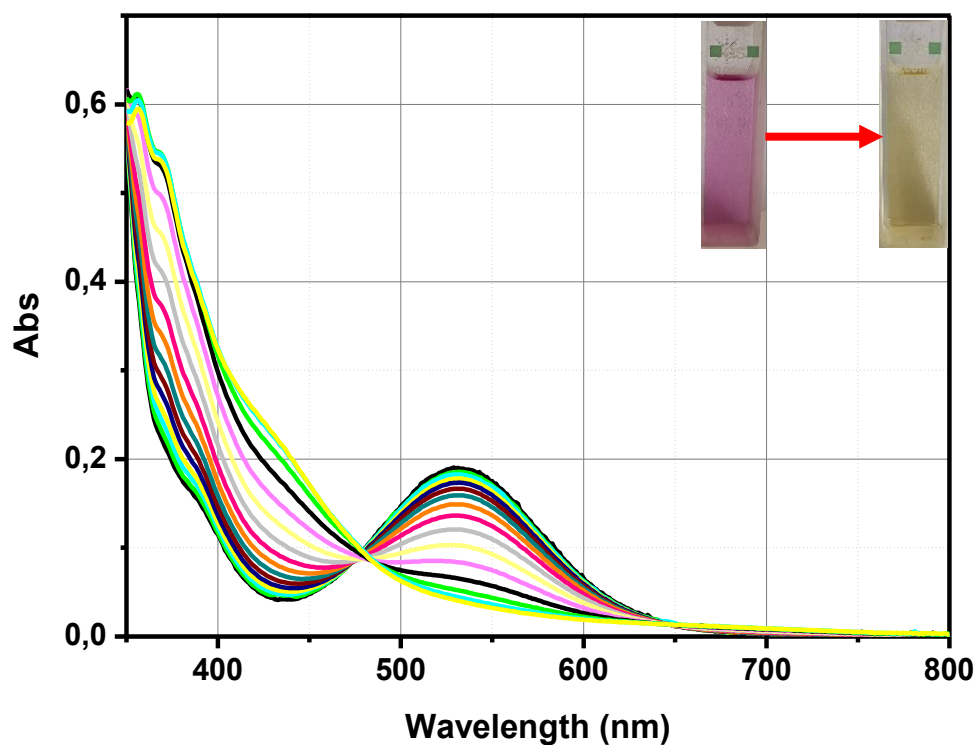

Compound D-A1

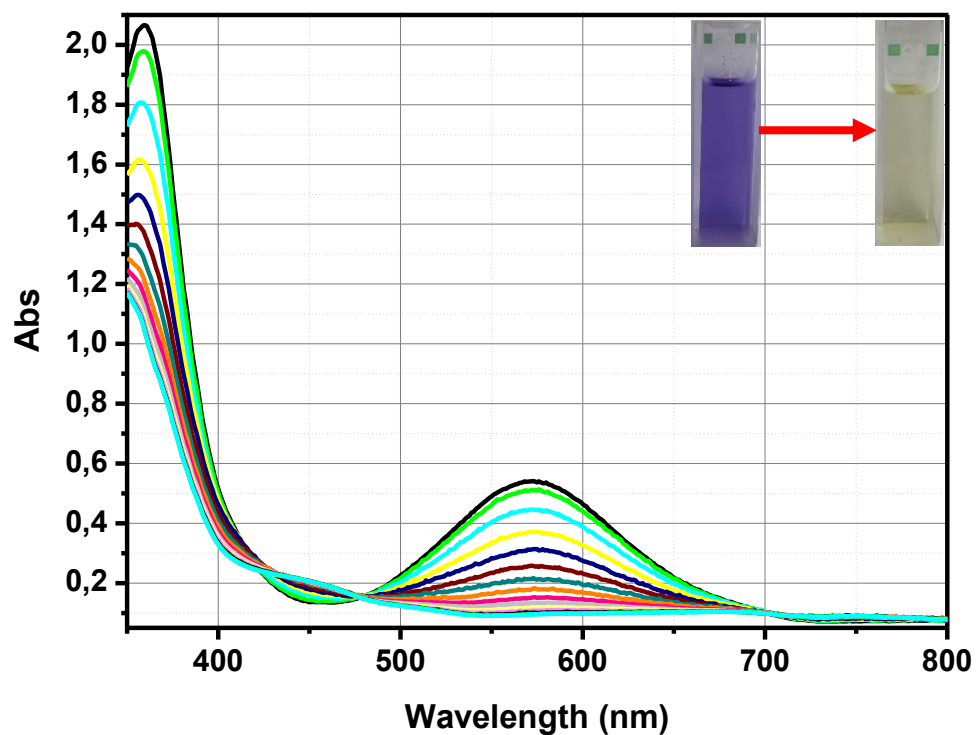

Compound D-A2

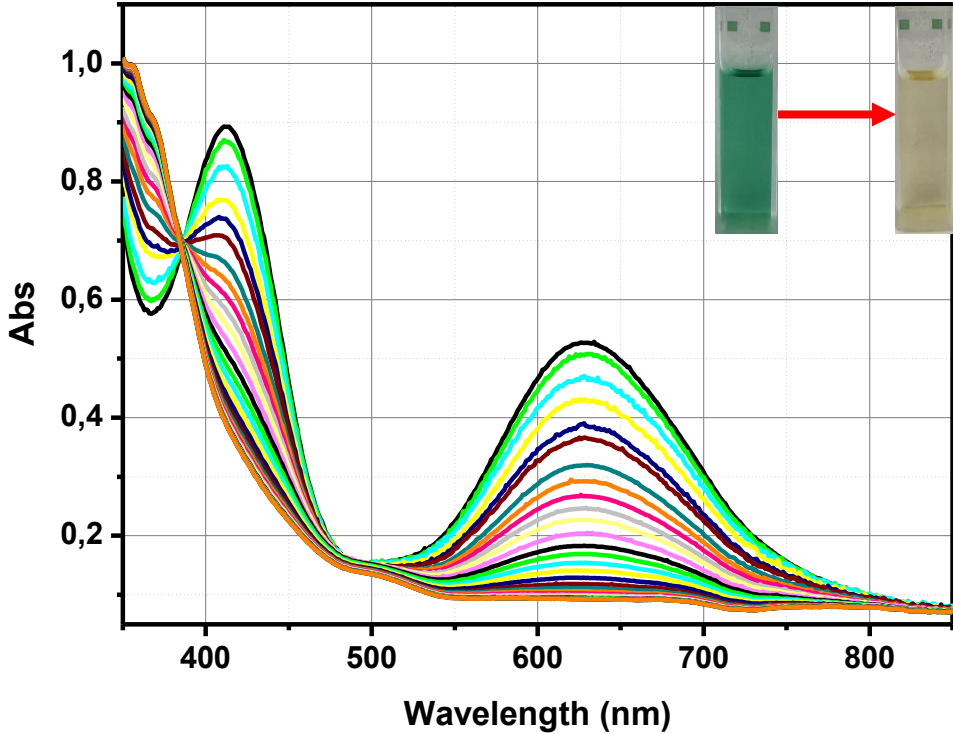

Compound D-A3

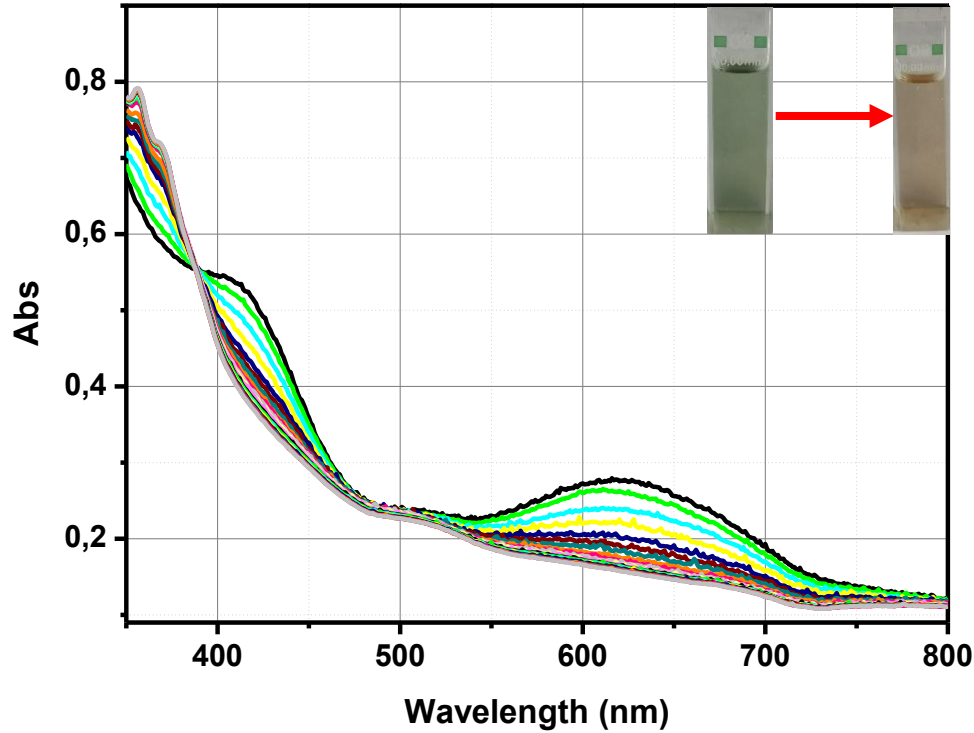

Compound D-A4

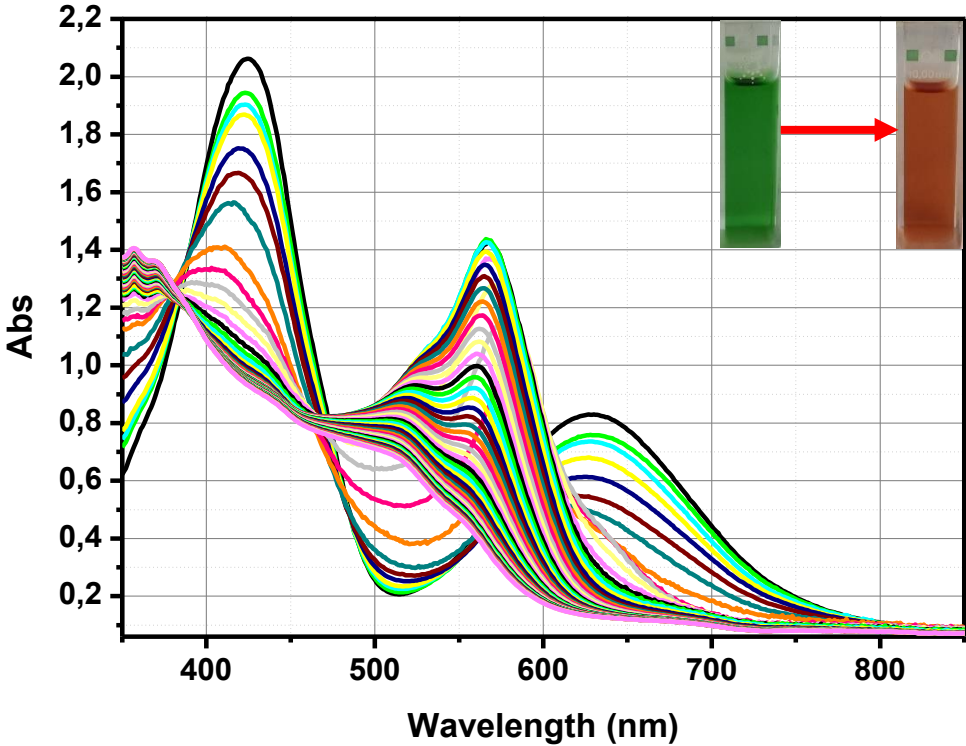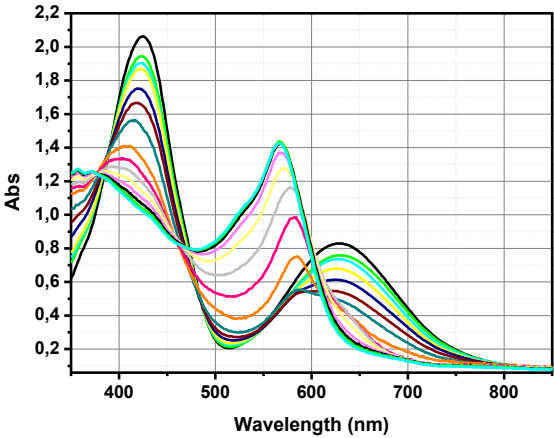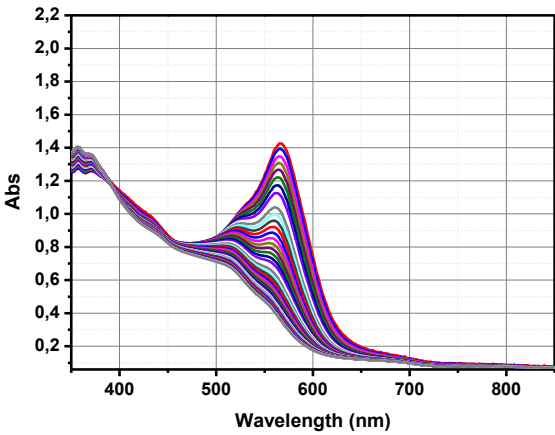

Compound D-A5

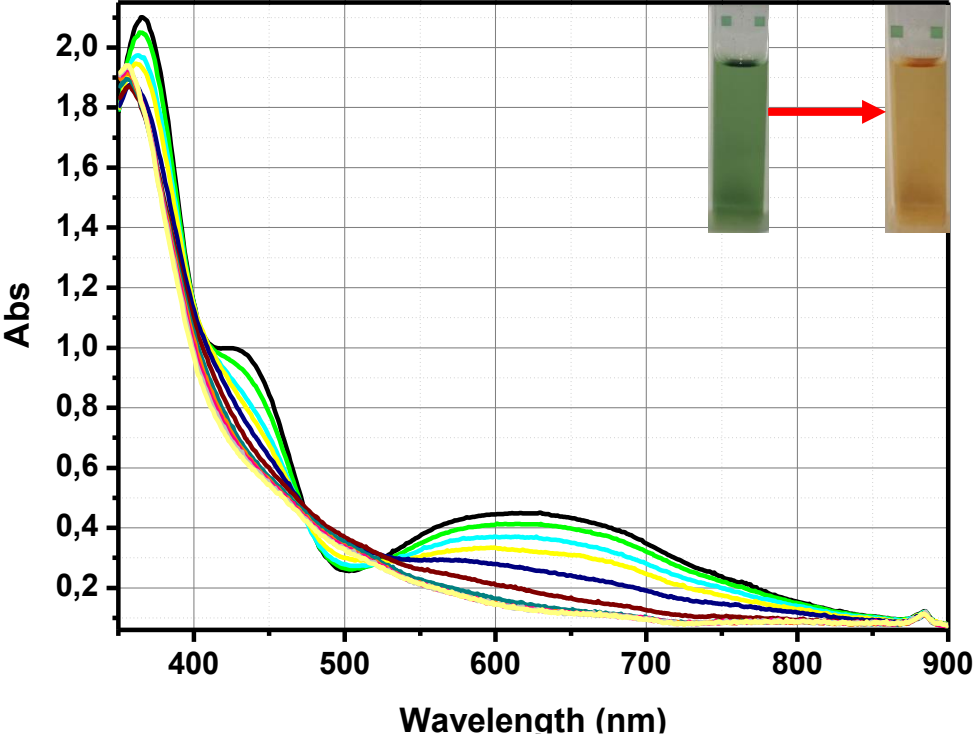

Compound D-A6

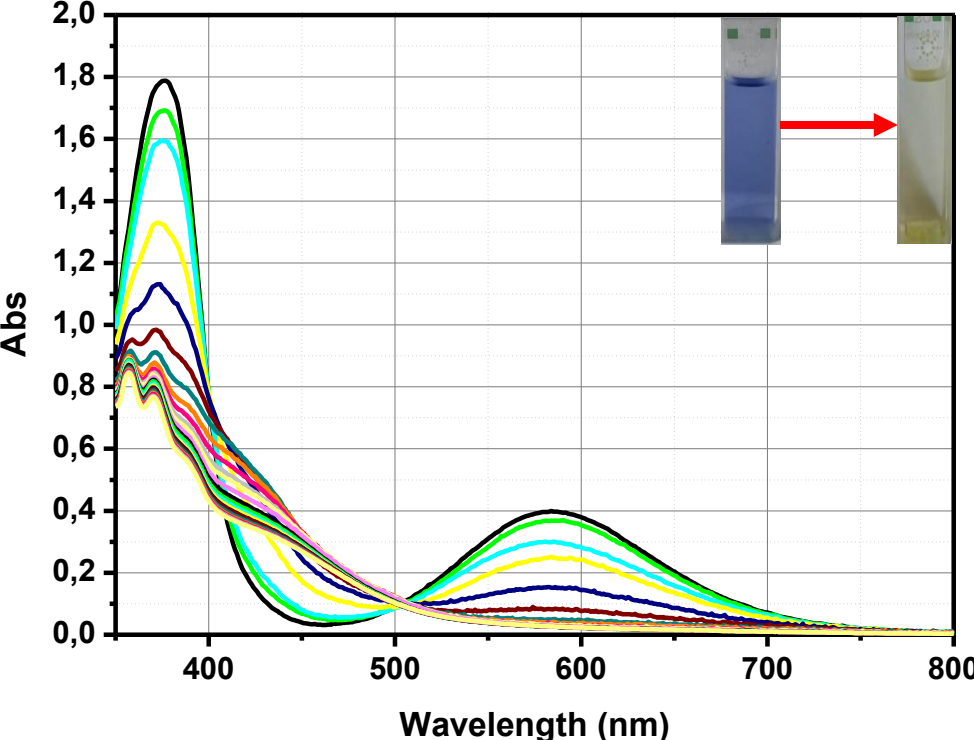

Compound D-A7

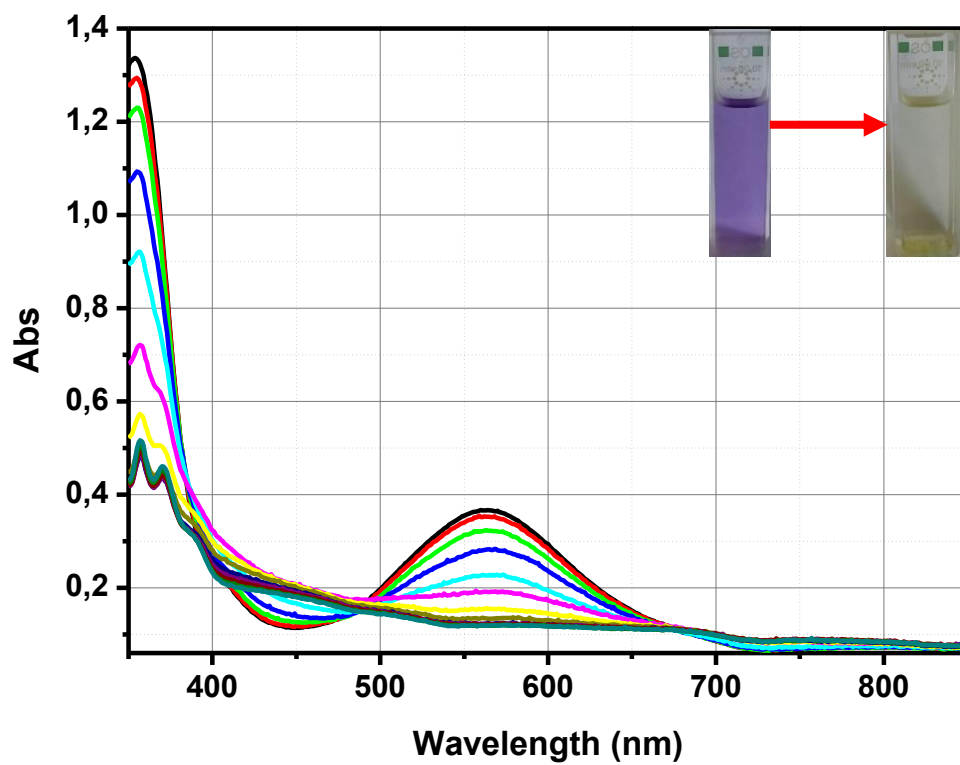

Compound D-A8

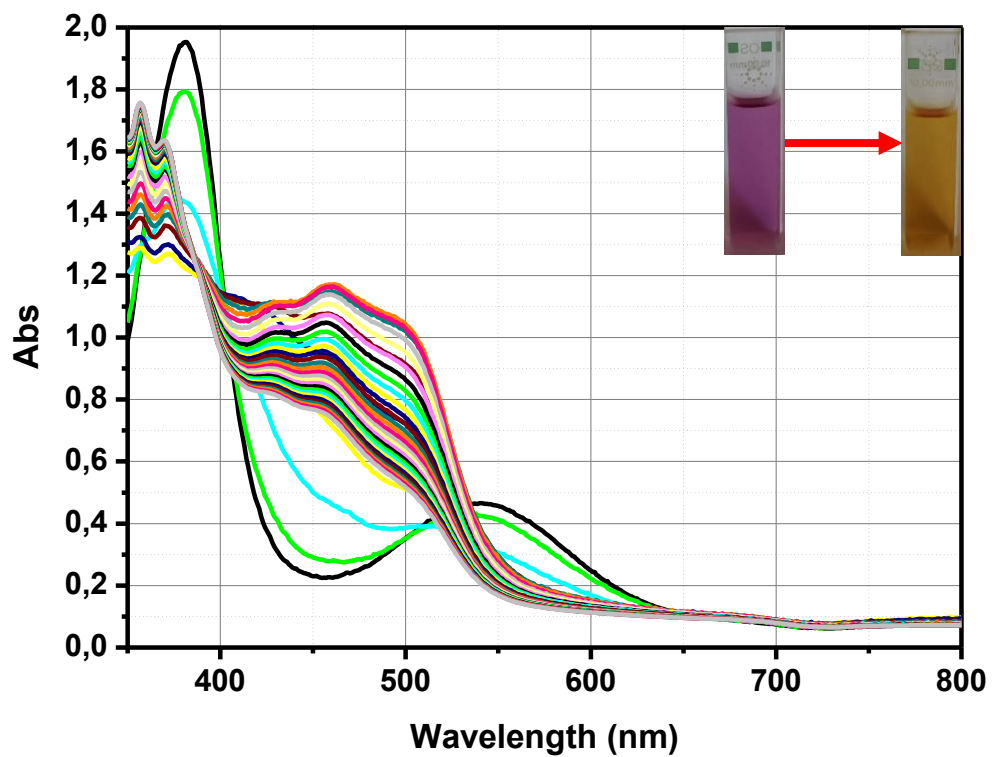

Compound D-A9

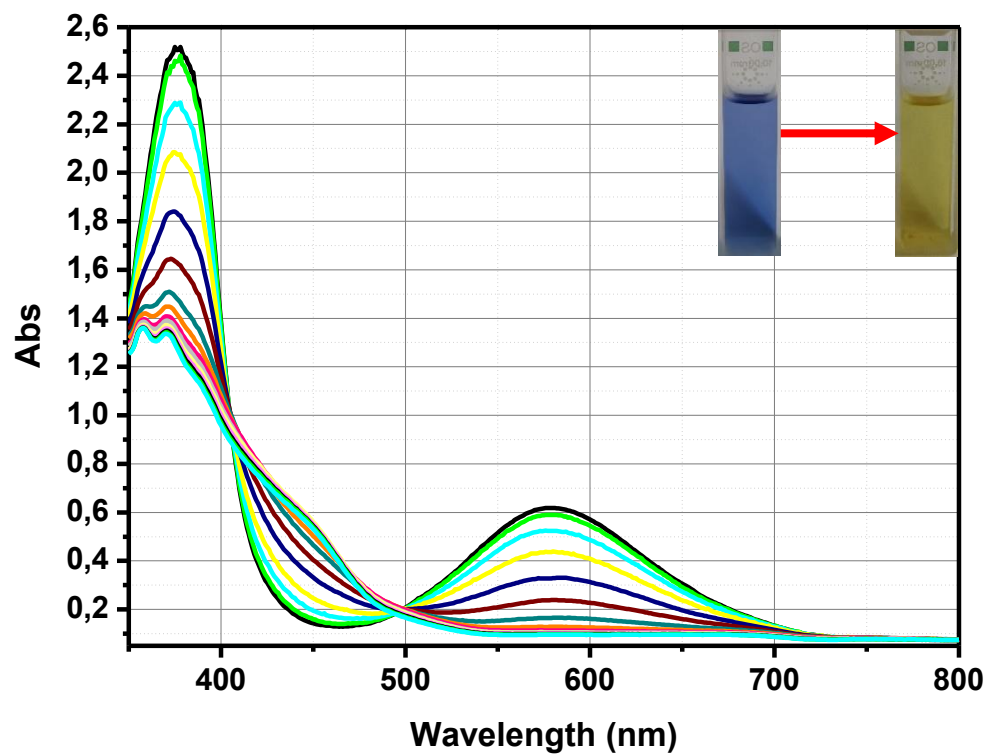

Compound D-A10

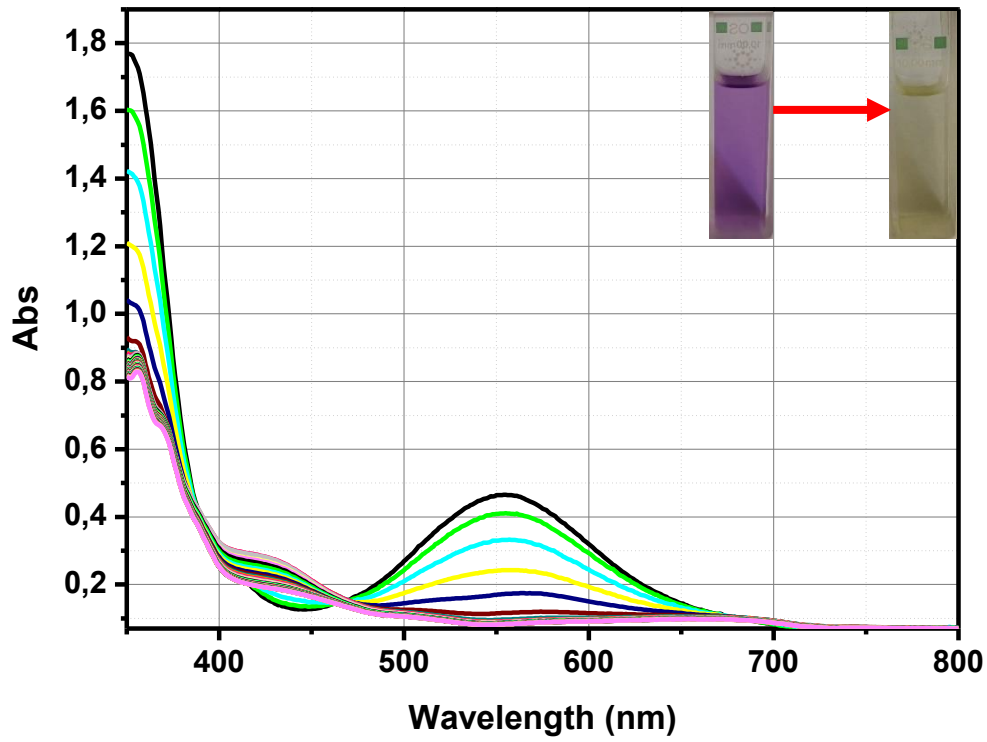

Compound D-A11

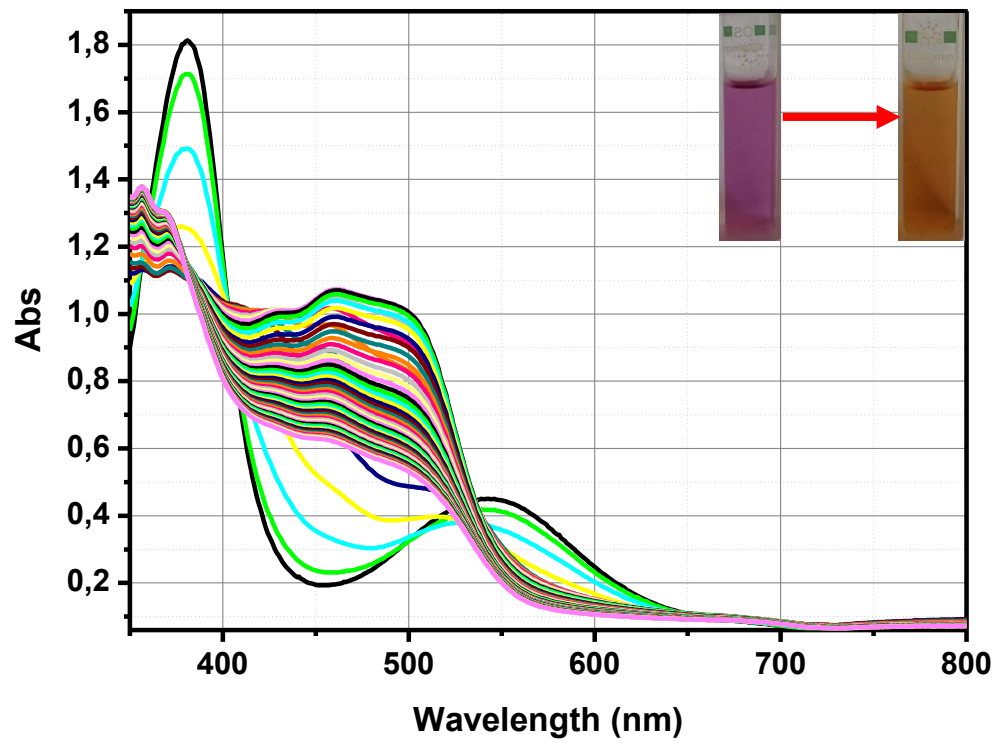

Compound A-D-A0

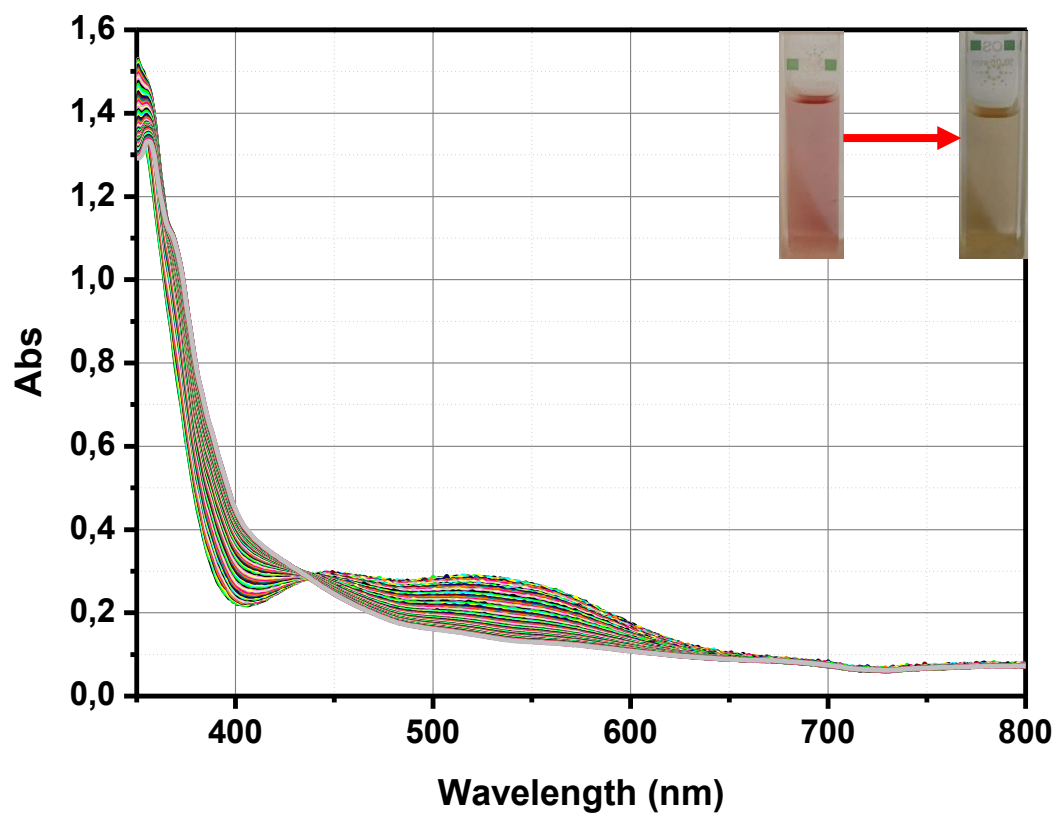

Compound A-D-A1

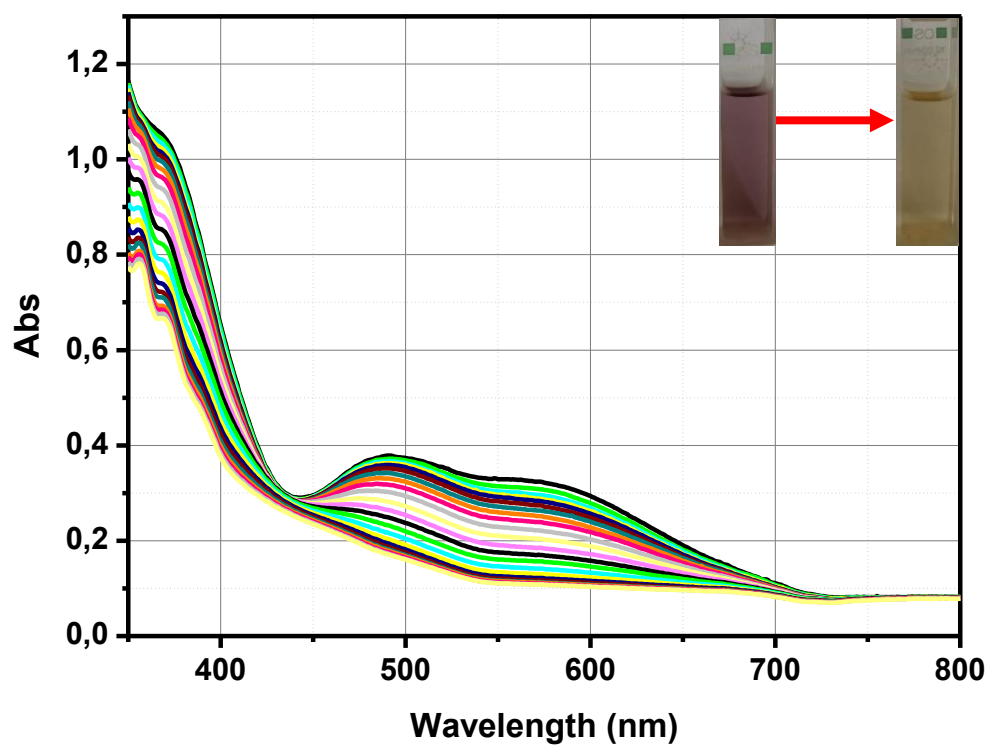

Compound A-D-A2



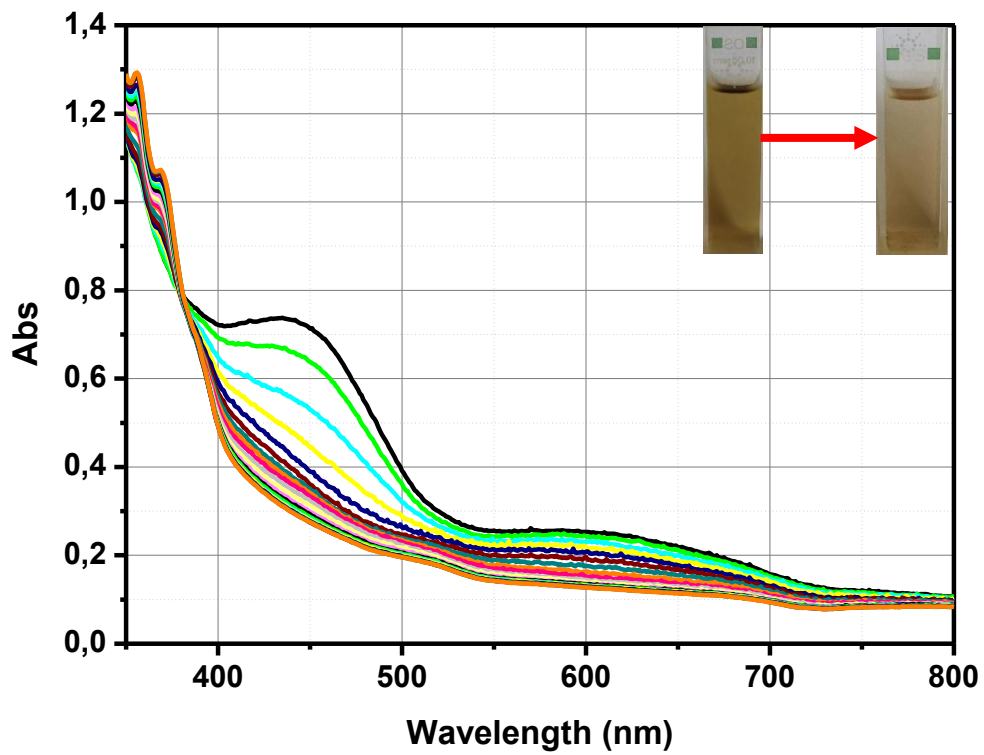

Compound A-D-A3

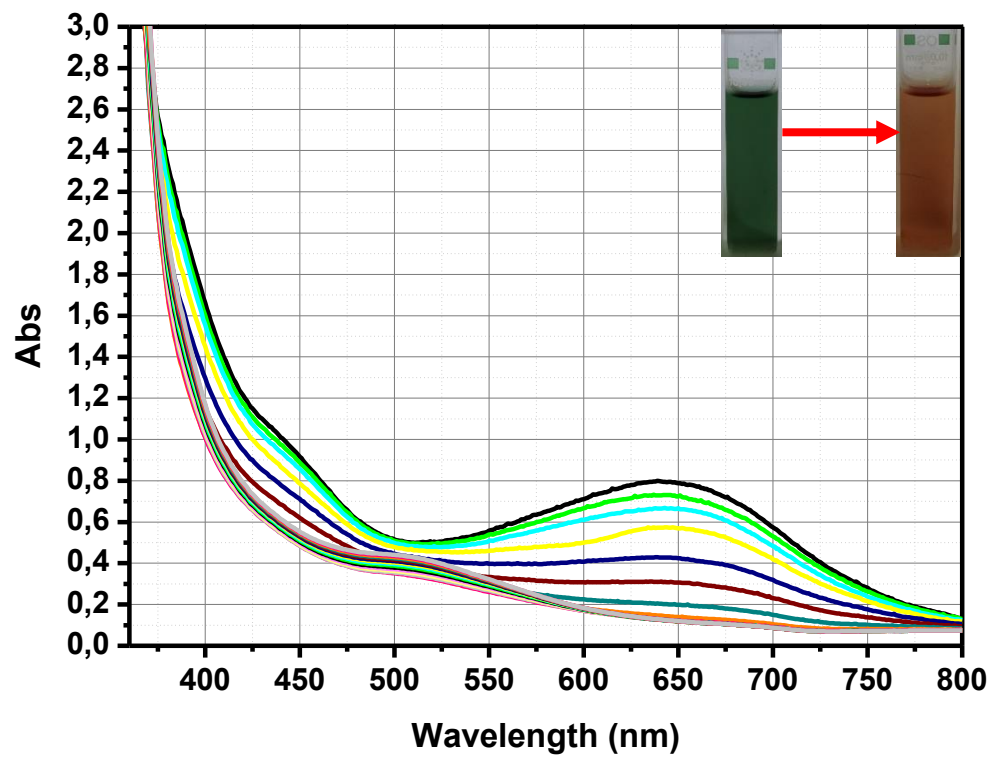

Compound A-D-A4

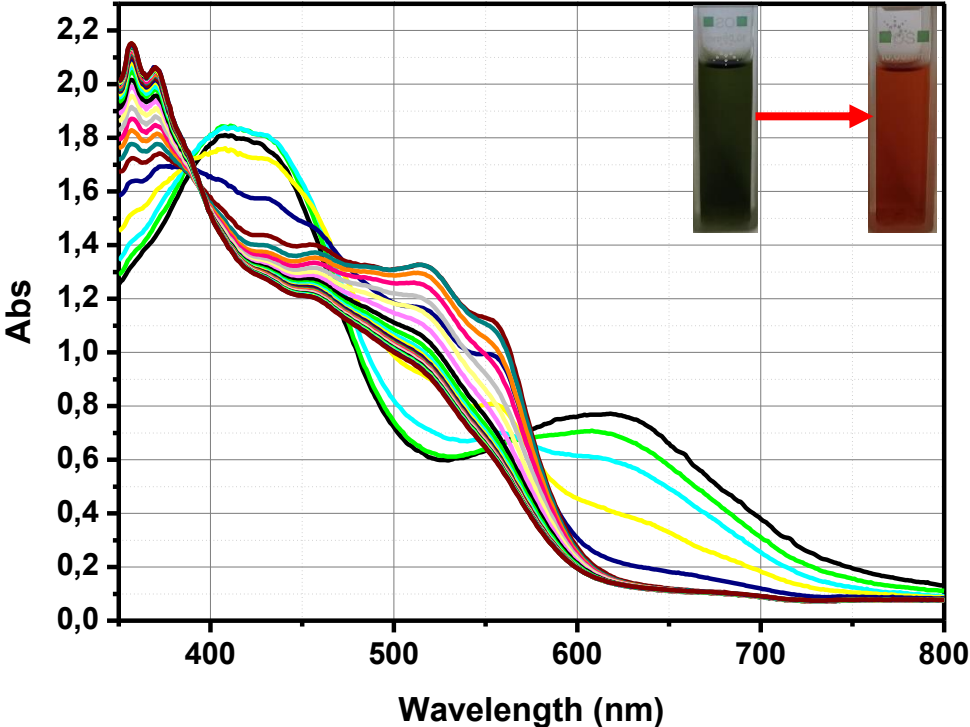

Compound A-D-A5

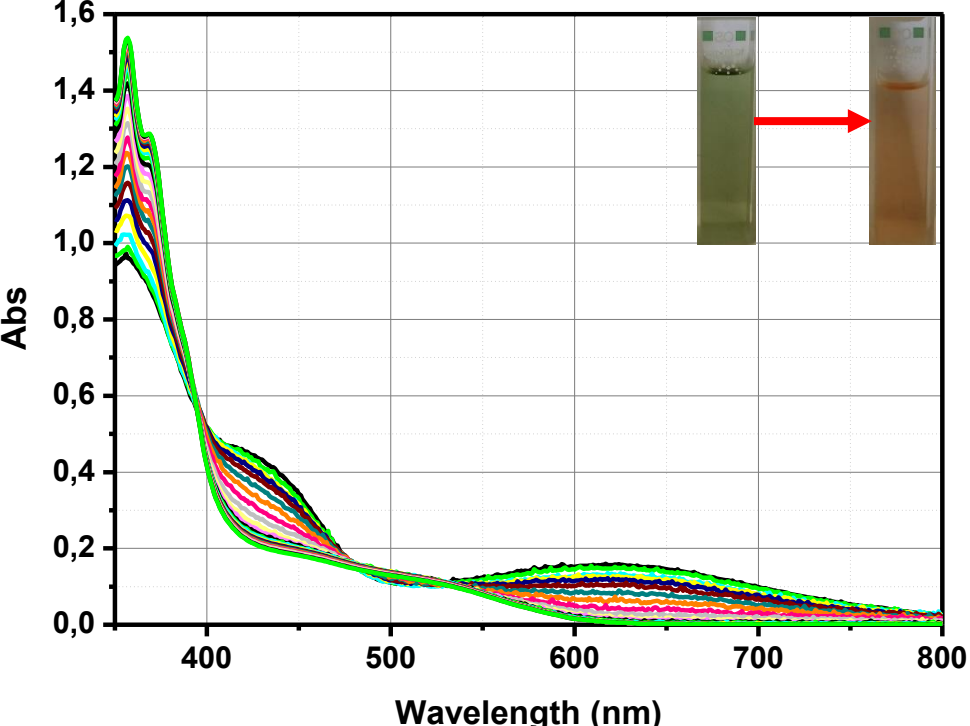

Compound A-D-A8

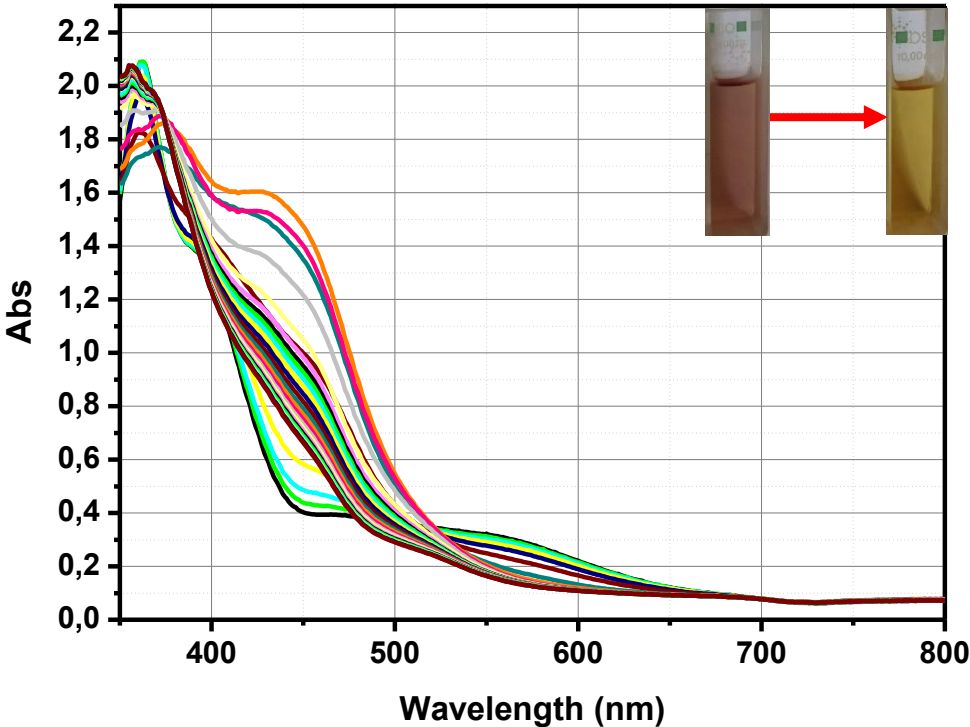

Compound A-D-A9

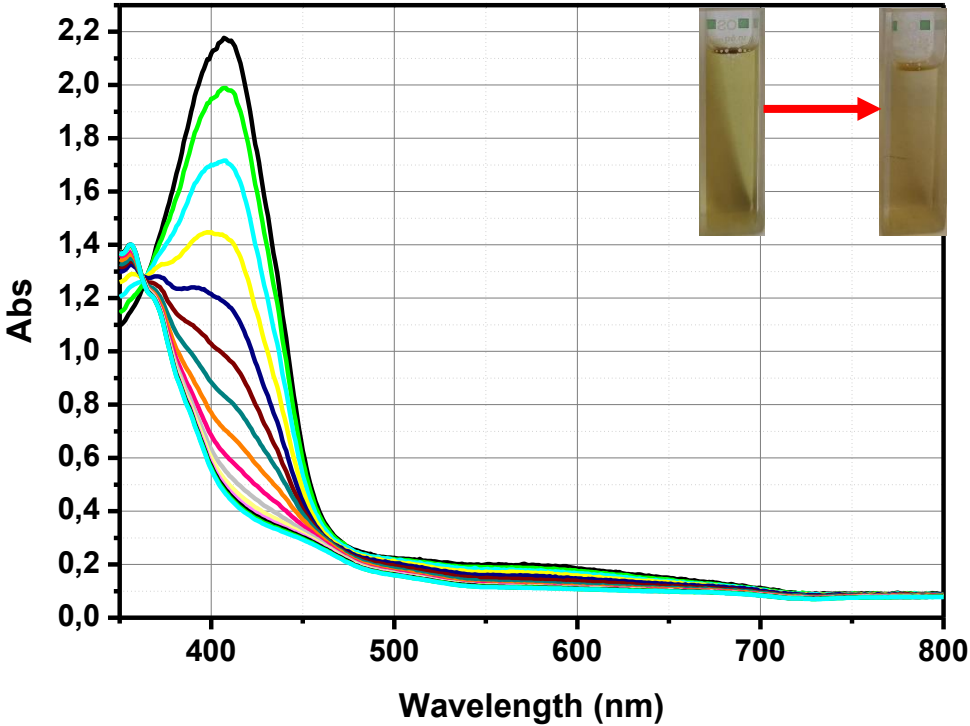

Compound A-D-A10

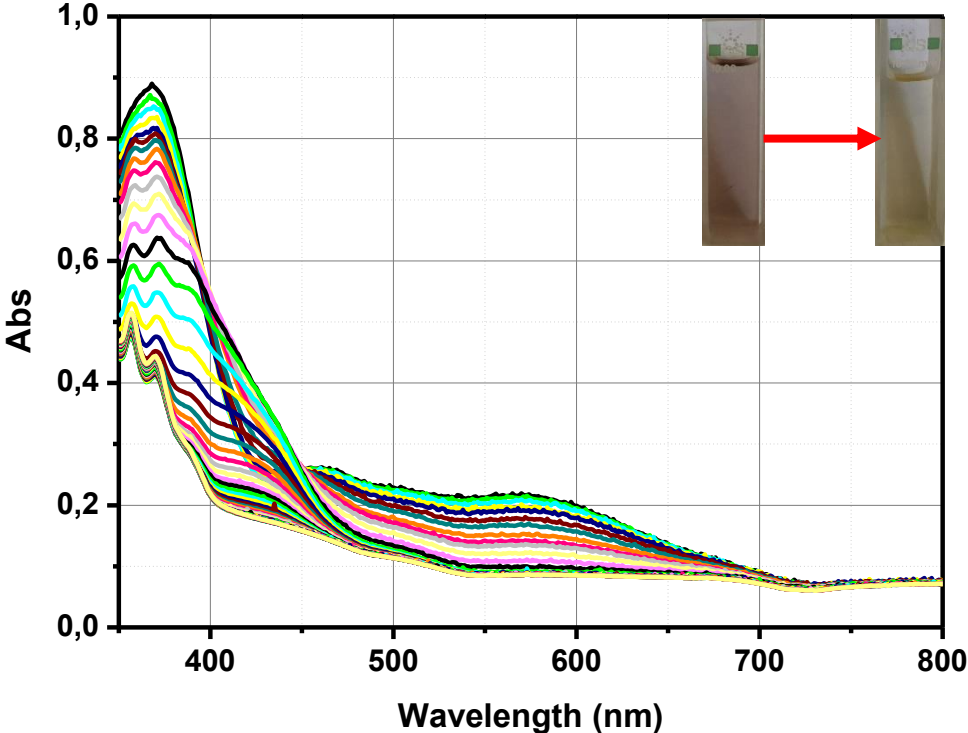

Compound A-D-A11

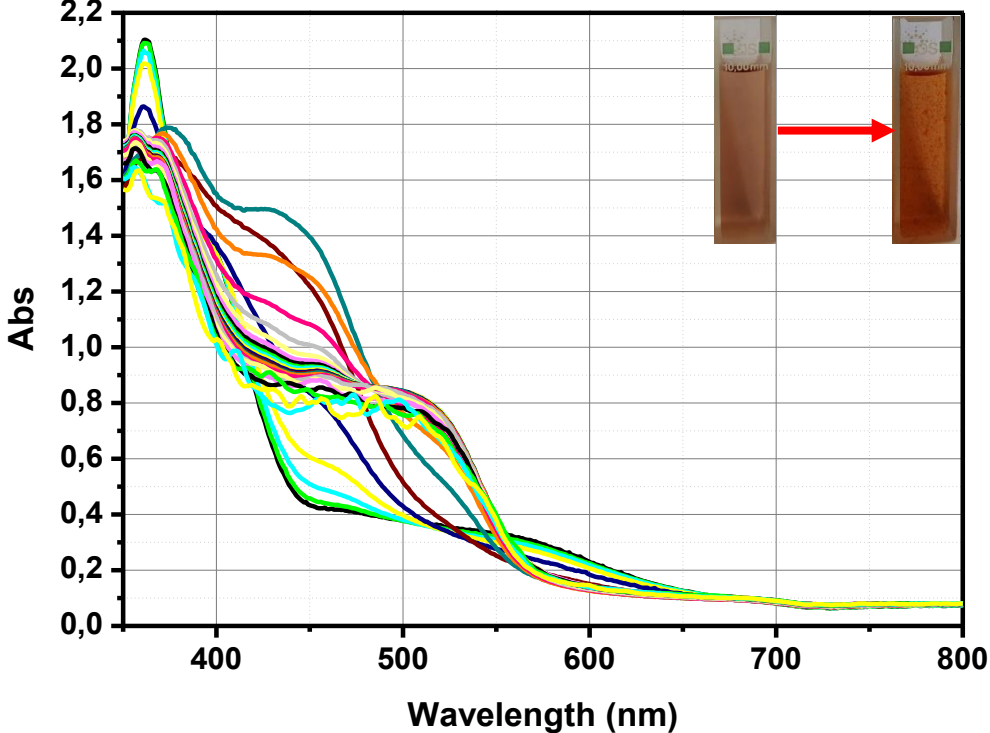

### Cyclic voltammograms of the different dyes

The electrochemical properties of the investigated compounds were measured in dichloromethane by cyclic voltammetry, scan rate  $100 \text{ mV}\cdot\text{s}^{-1}$ , with tetrabutylammonium perchlorate (0.1M) as the supporting electrolyte in a standard one-compartment, three-electrode electrochemical cell under an argon stream using a VSP BioLogic potentiostat. The working, pseudo-reference and counter electrodes were platinum disk ( $\text{Ø} = 1 \text{ mm}$ ), Ag wire, and Au wire gauze, respectively. Ferrocene was used as an internal standard.

#### Compound D-A0

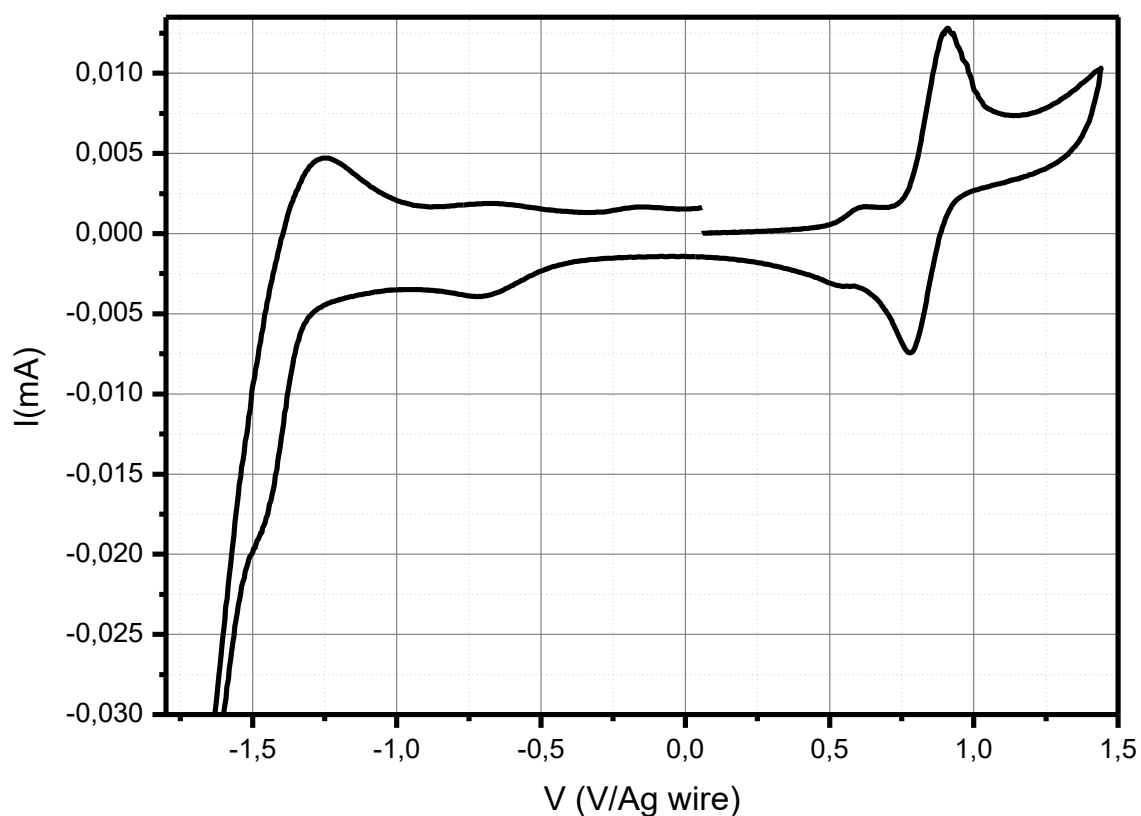

Compound D-A1

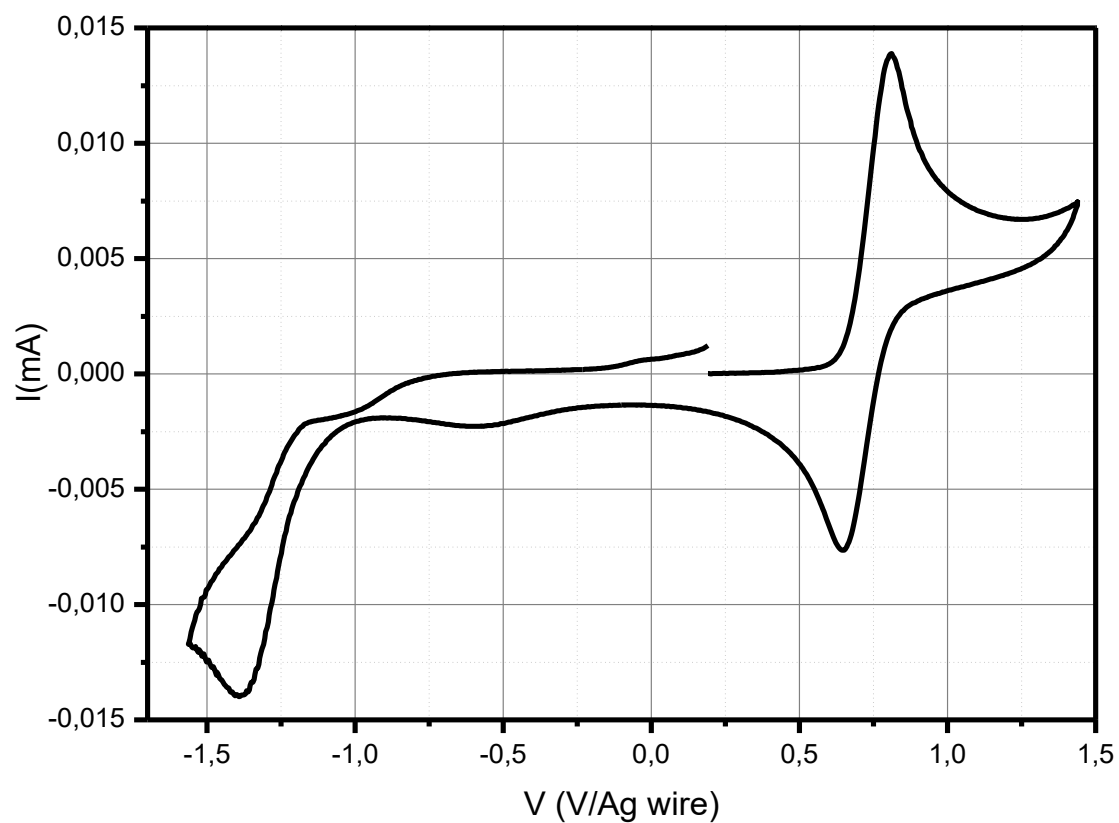

Compound D-A2

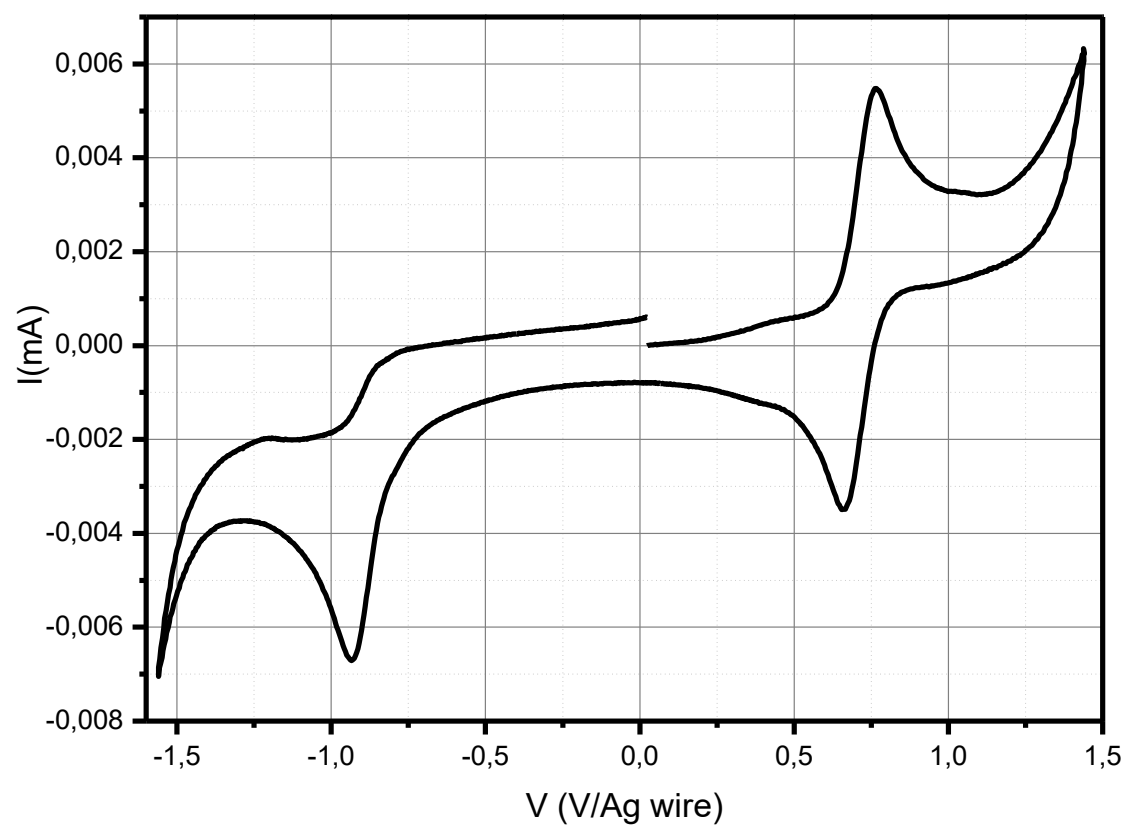

Compound D-A3

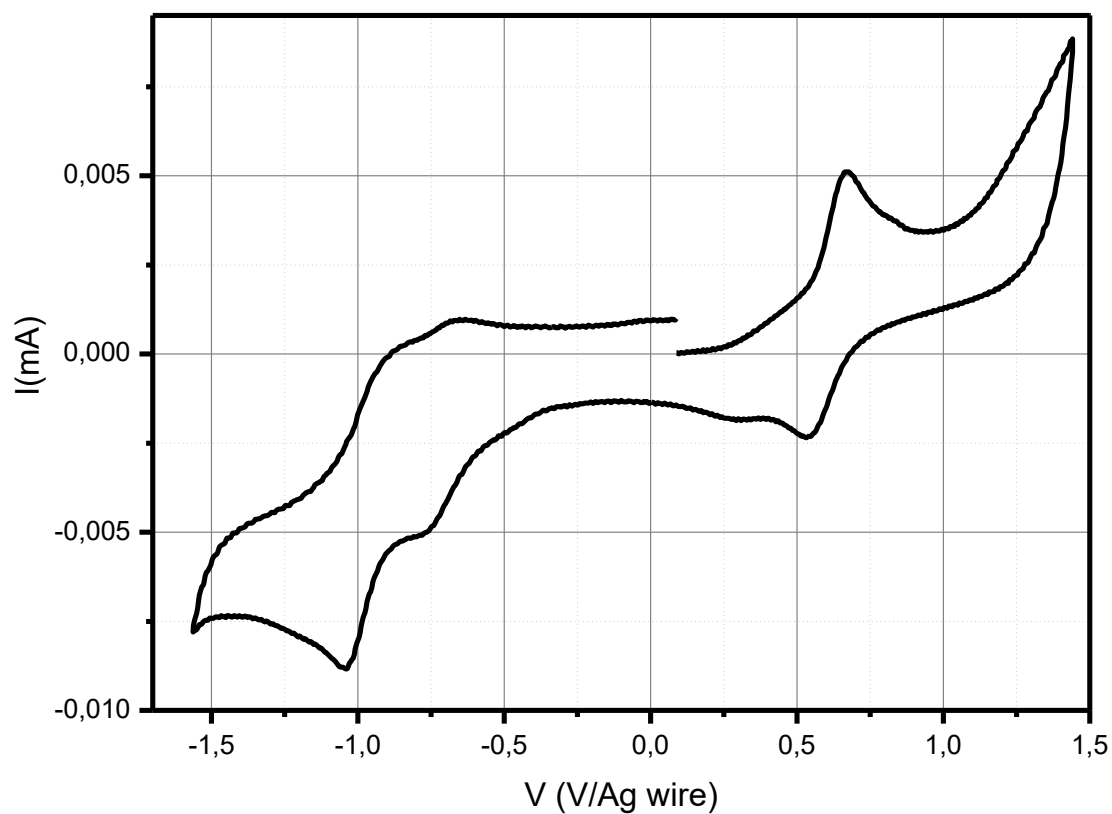

Compound D-A4

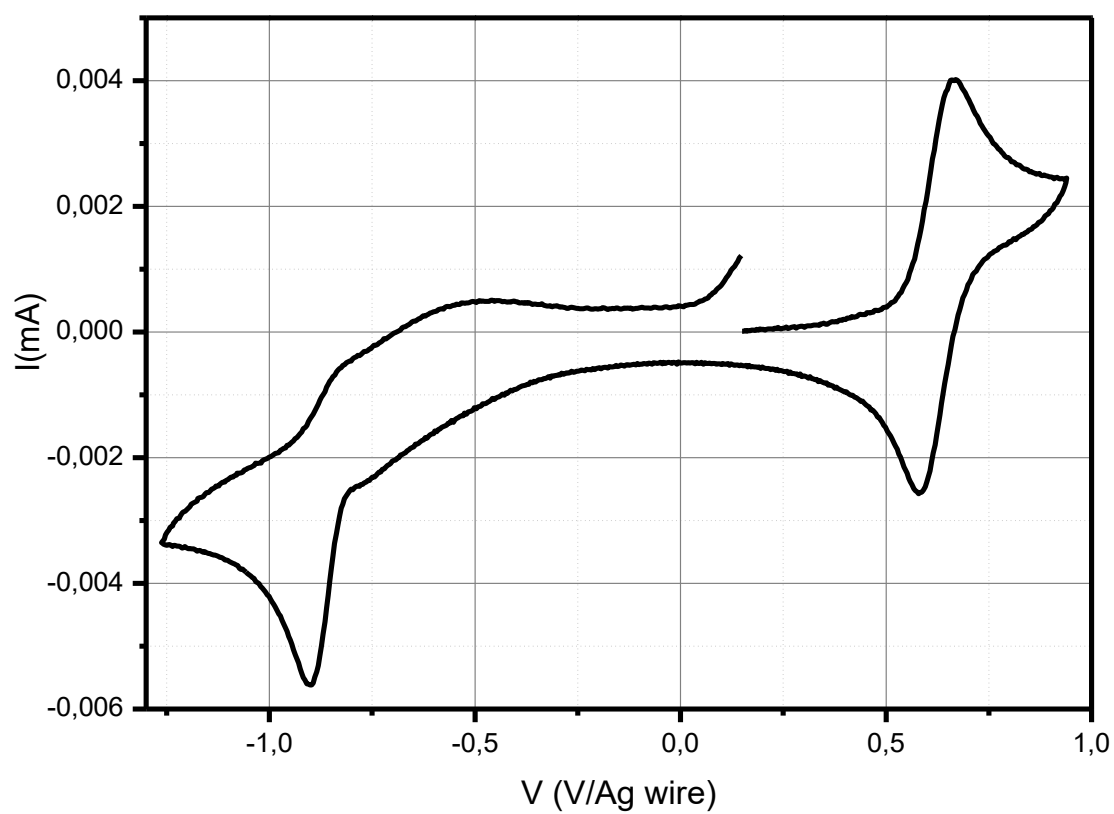

Compound D-A5

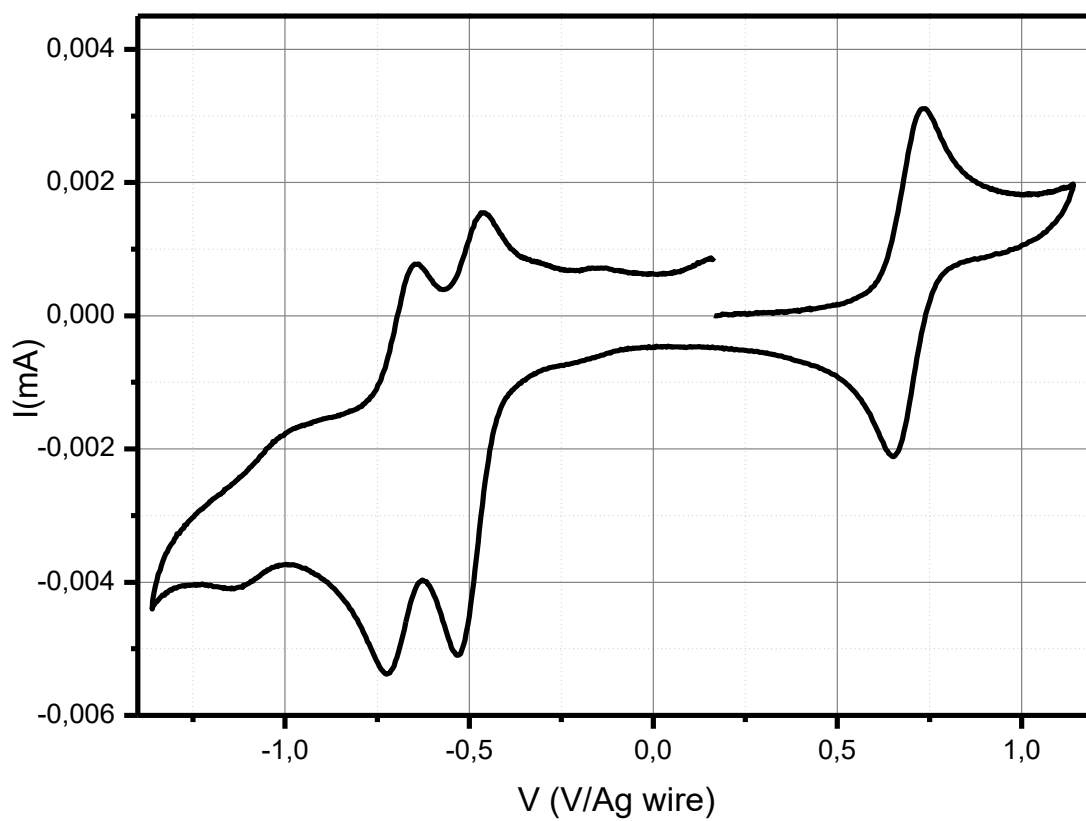

Compound D-A6

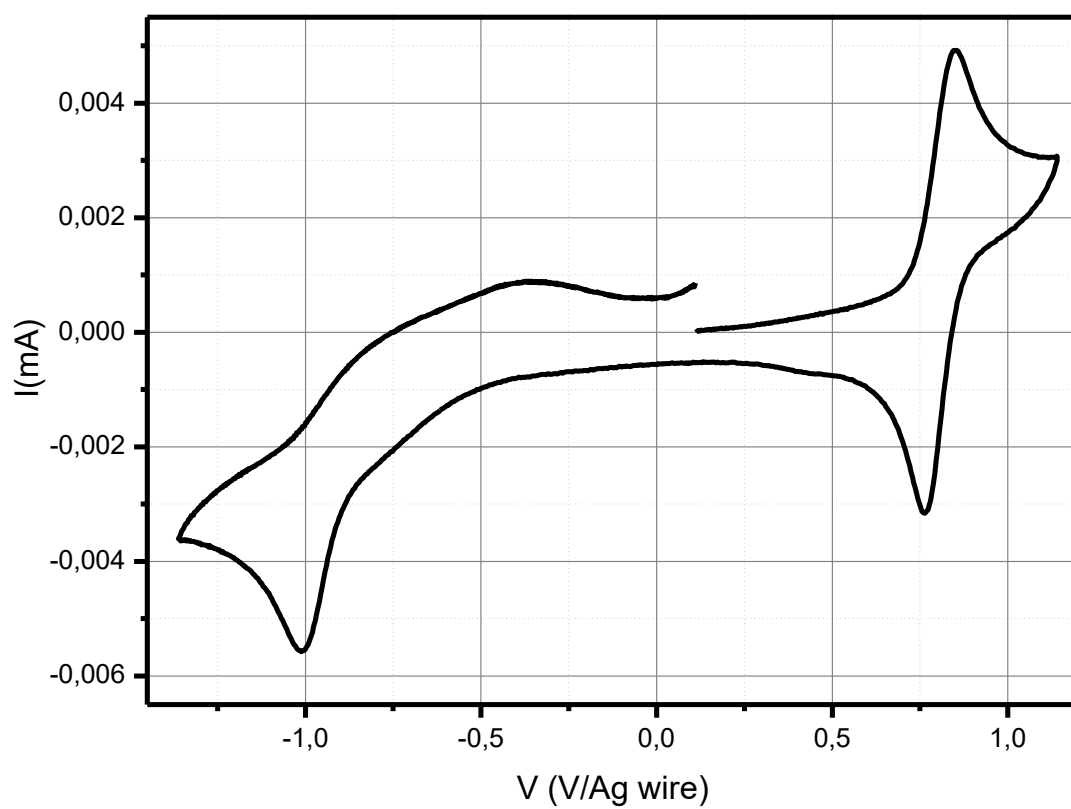



Compound D-A7

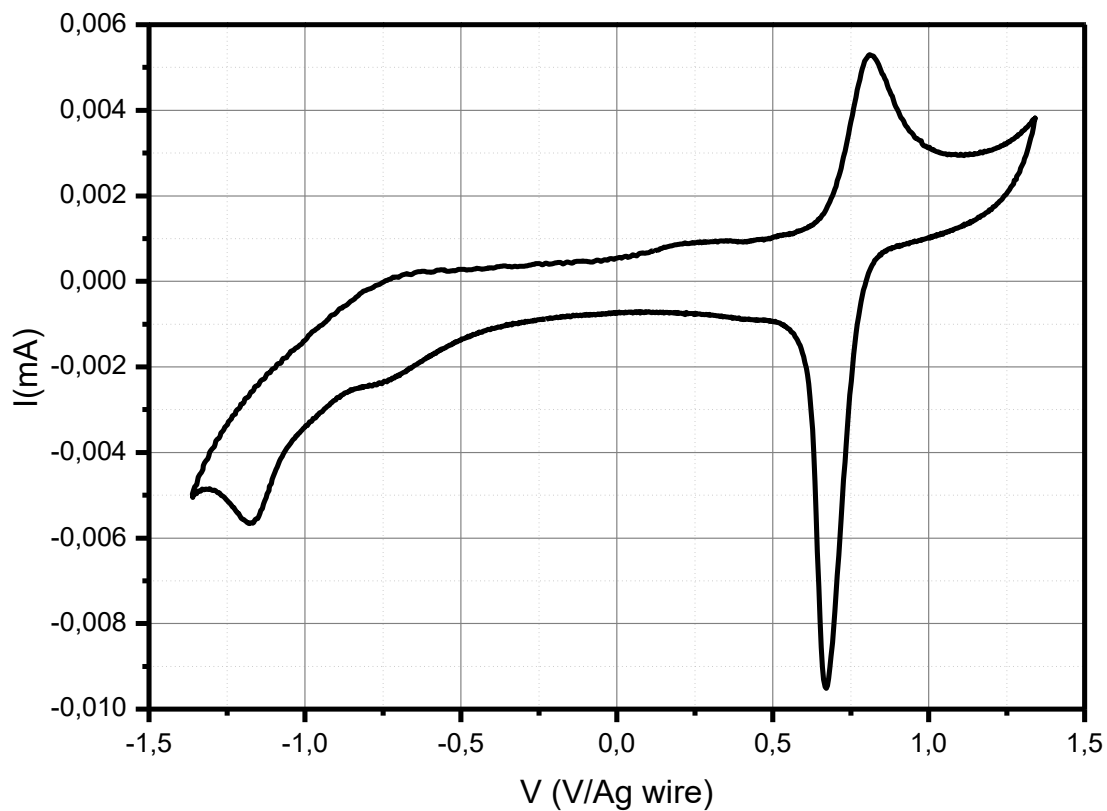

Compound D-A8

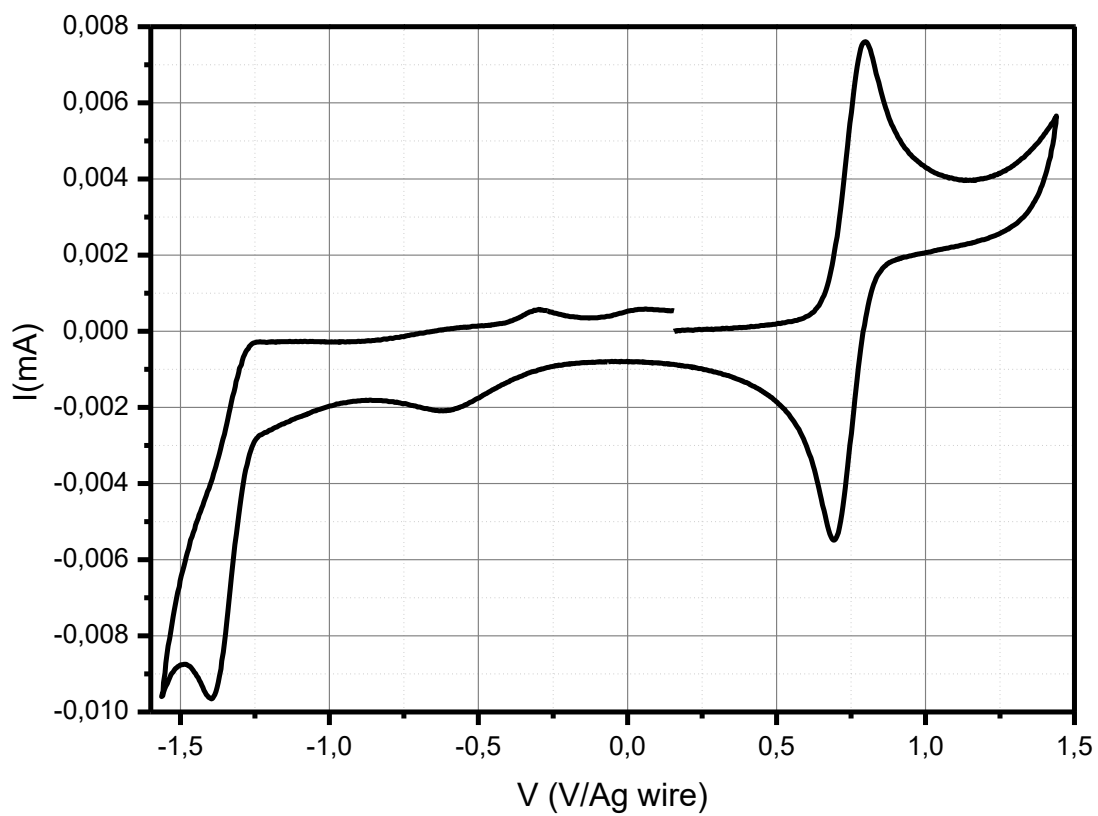

Compound D-A9

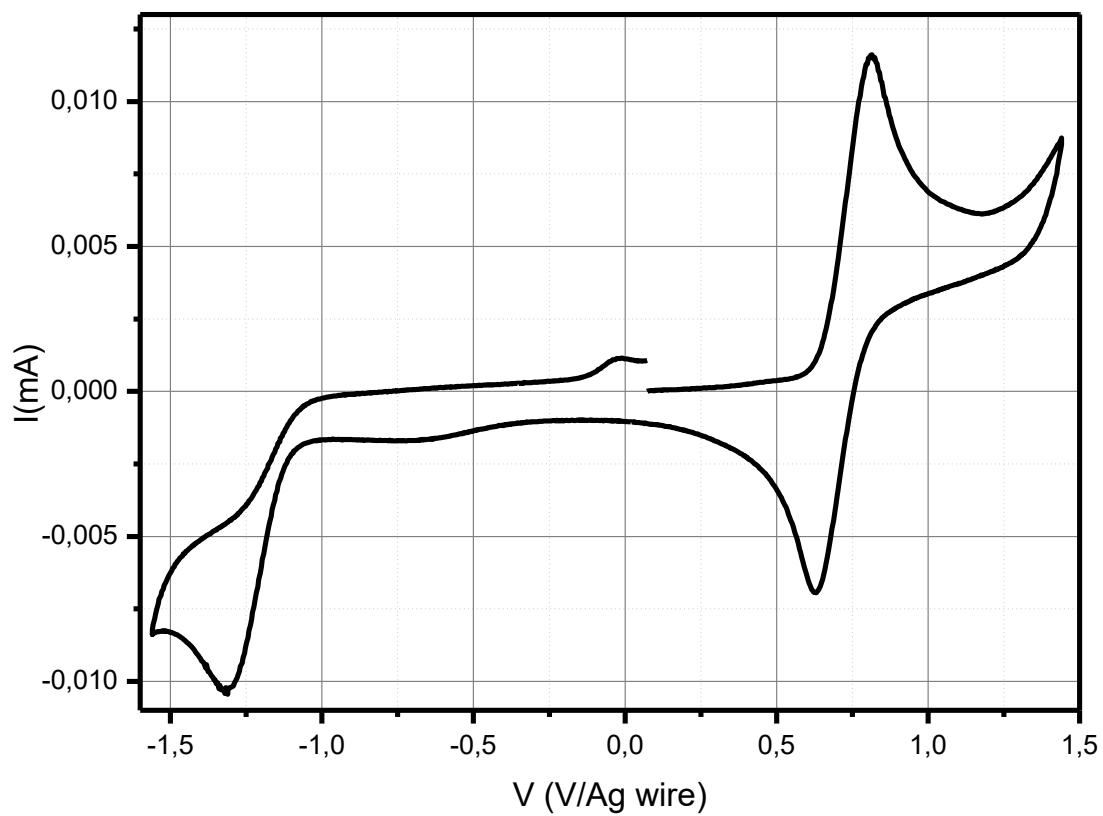

Compound D-A10

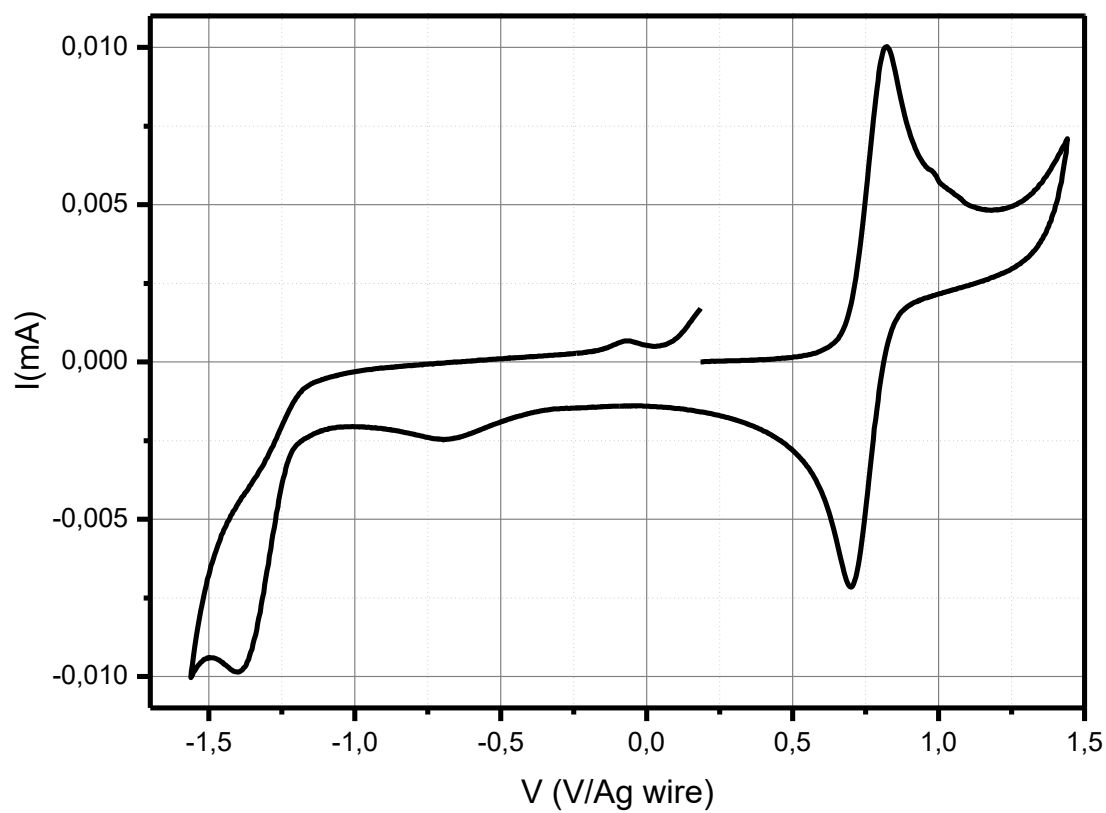

Compound D-A11

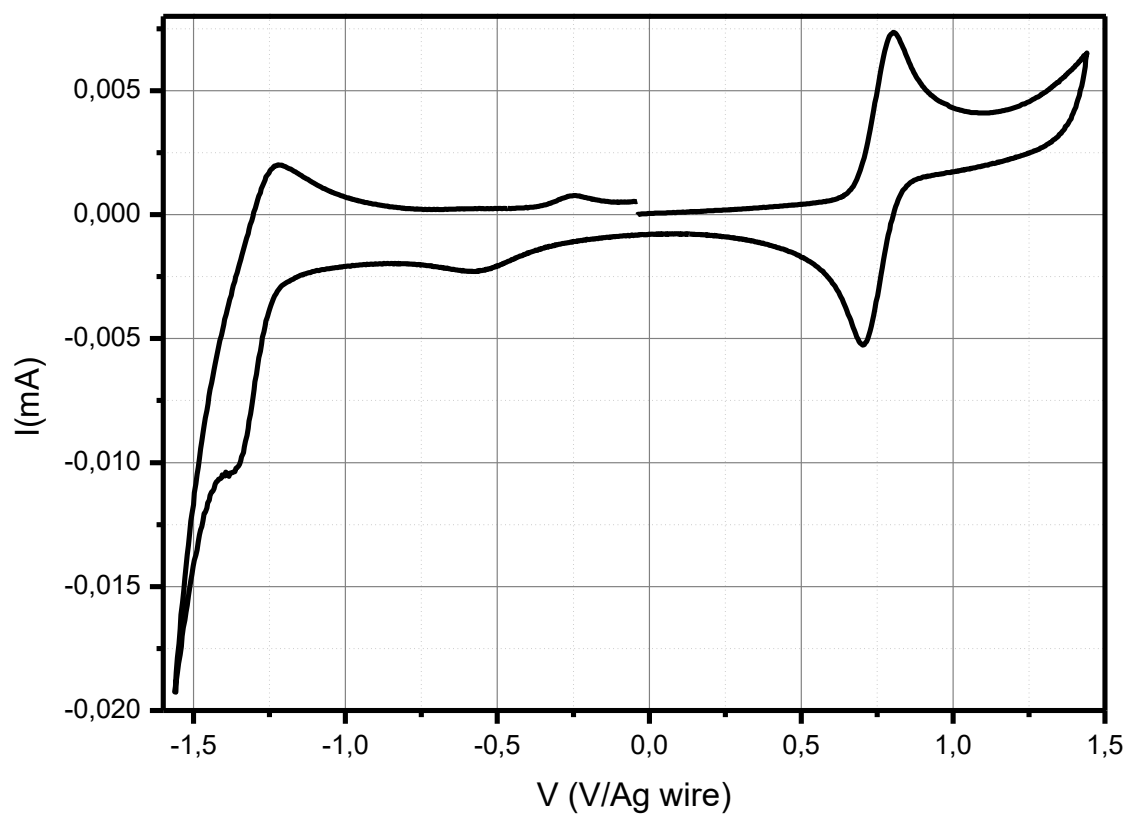

Compound A-D-A0

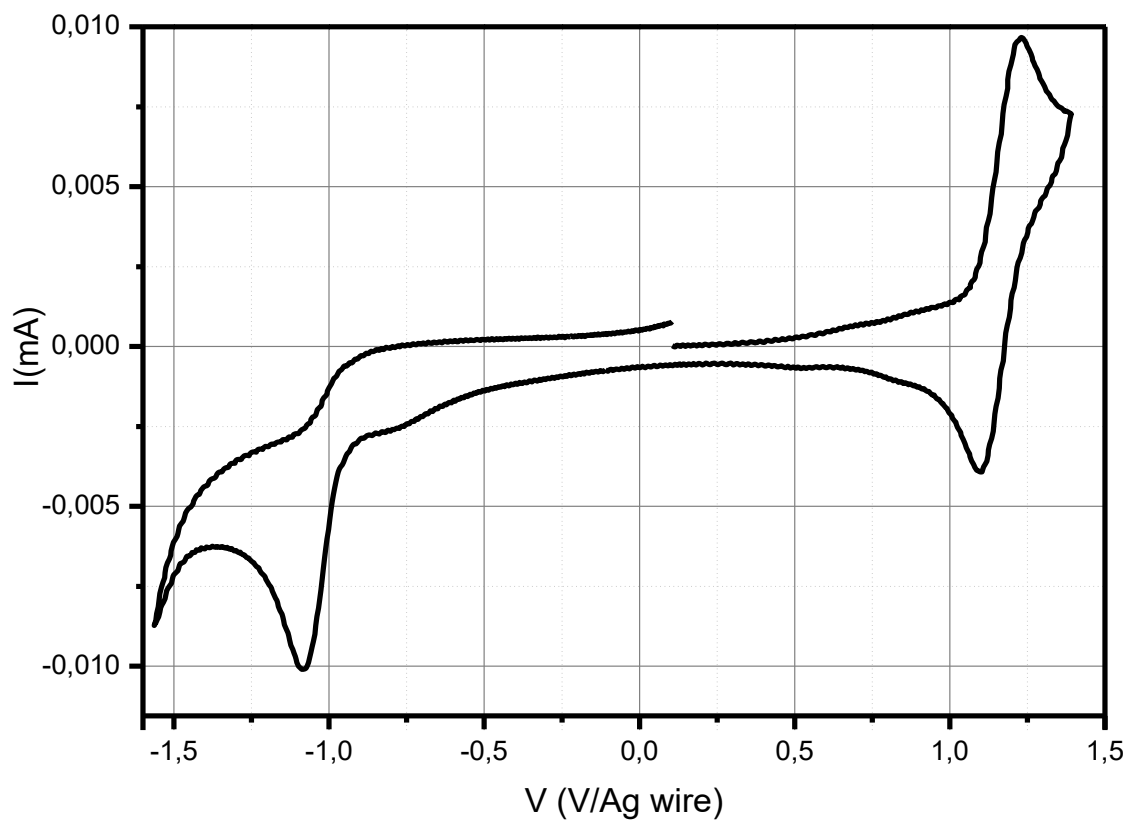

Compound A-D-A1

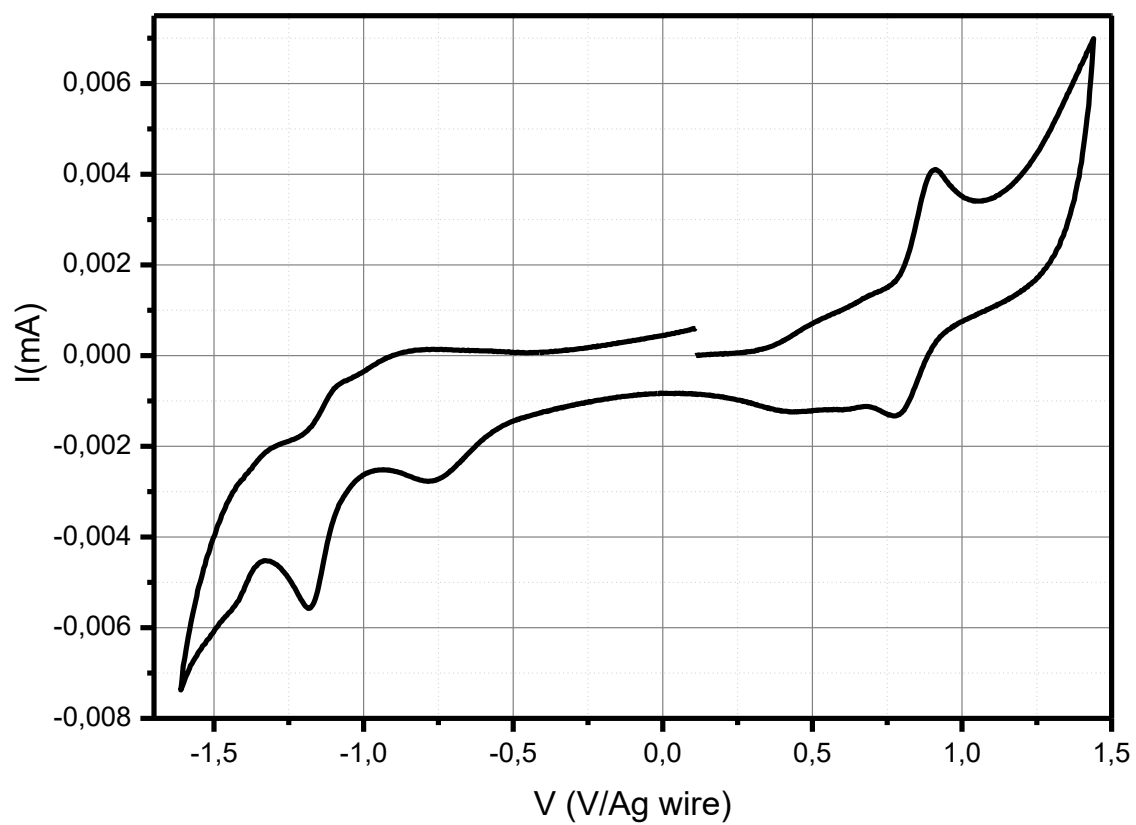

Compound A-D-A2

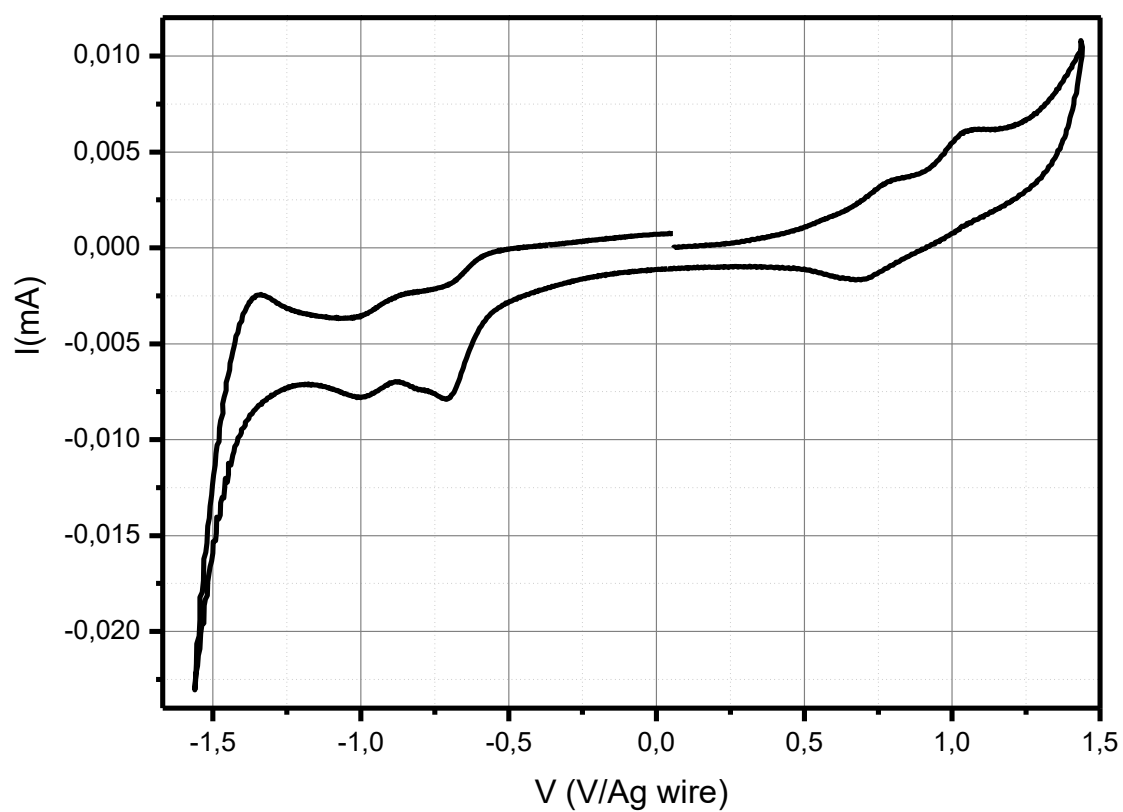

Compound A-D-A3

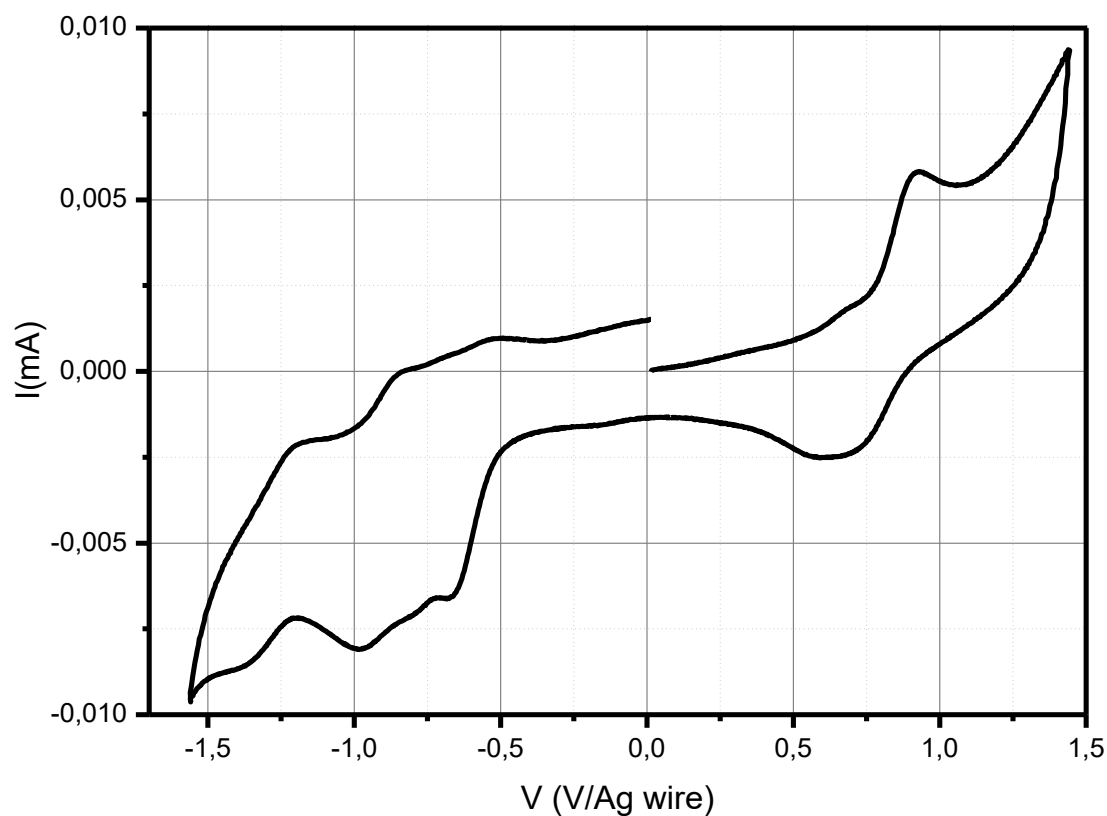

Compound A-D-A4

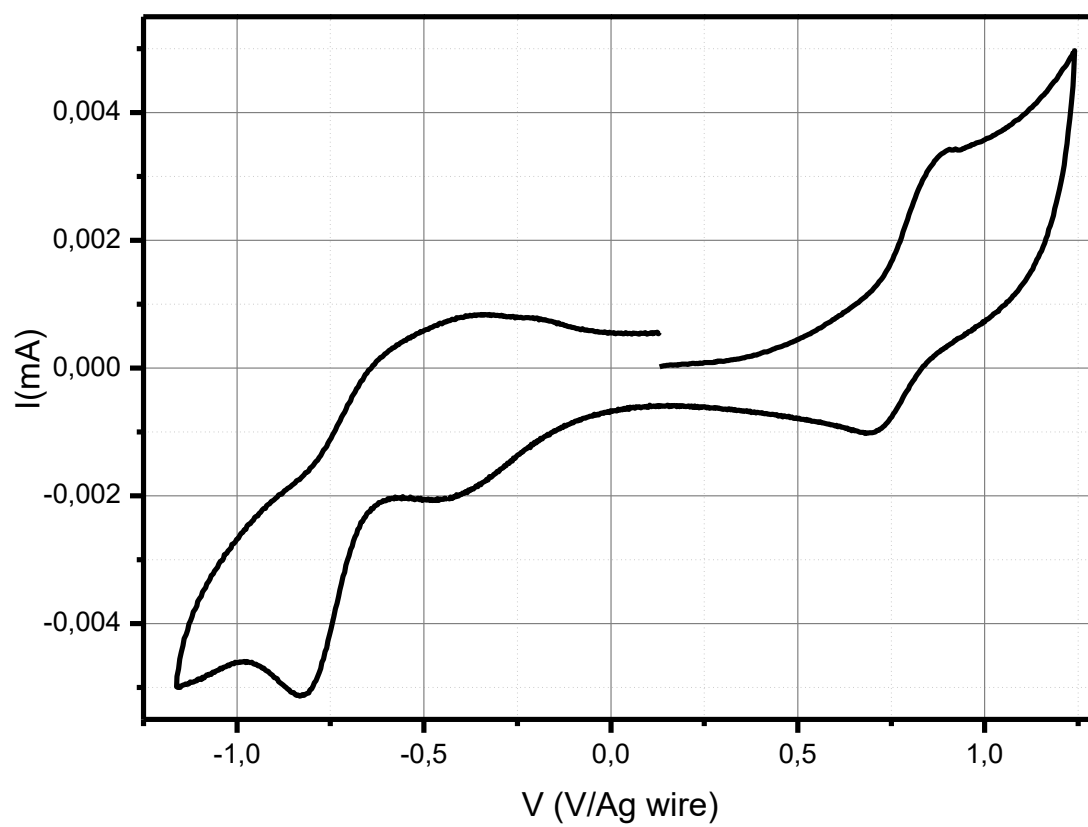

Compound A-D-A5

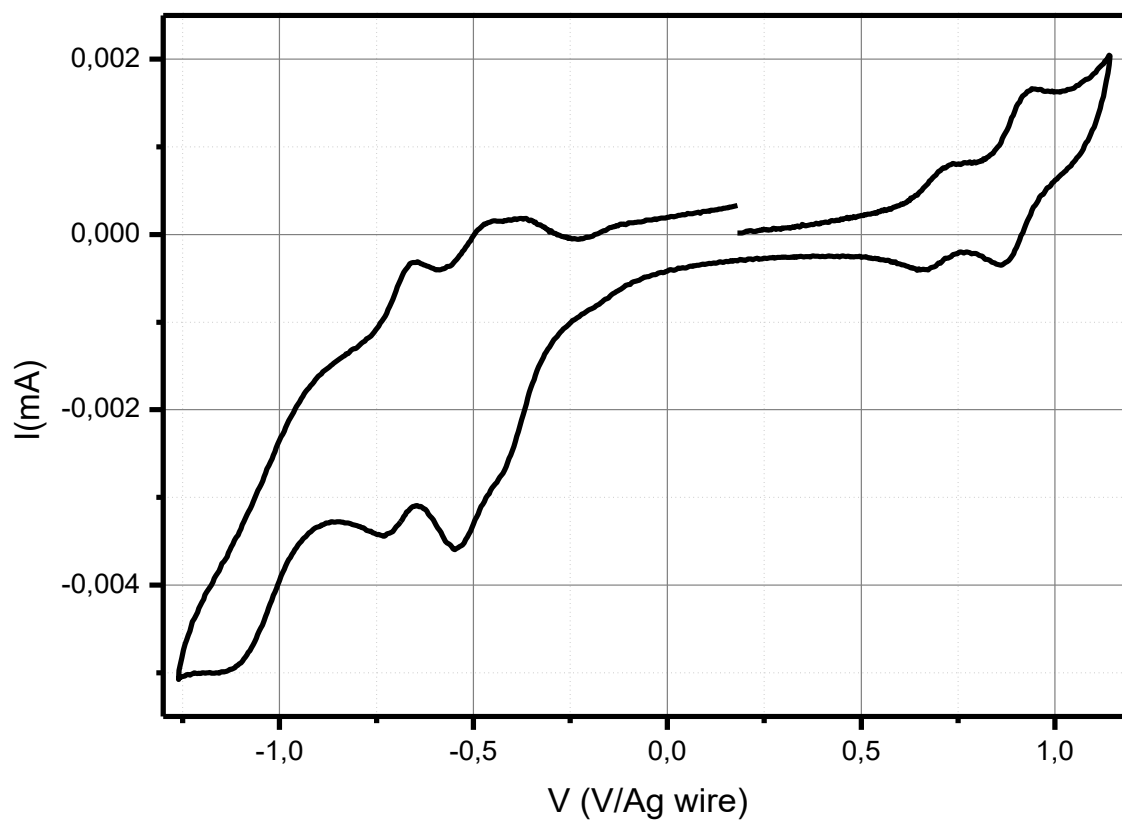

Compound A-D-A8

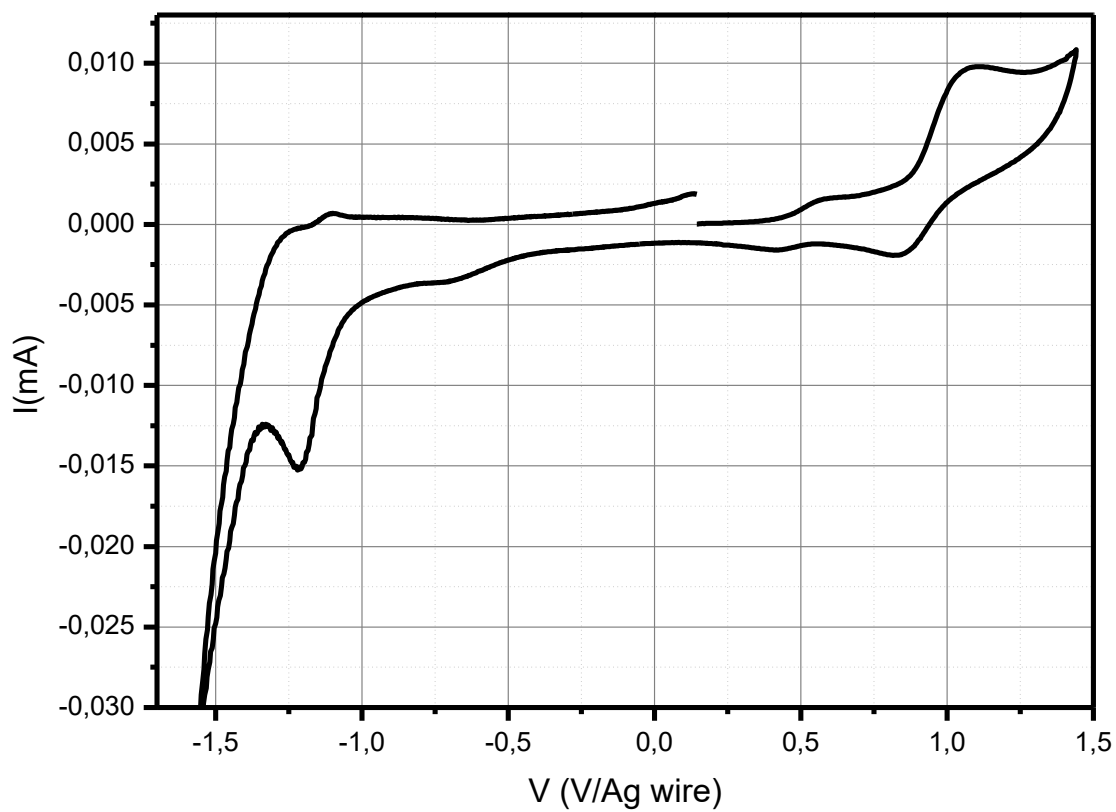

Compound A-D-A10

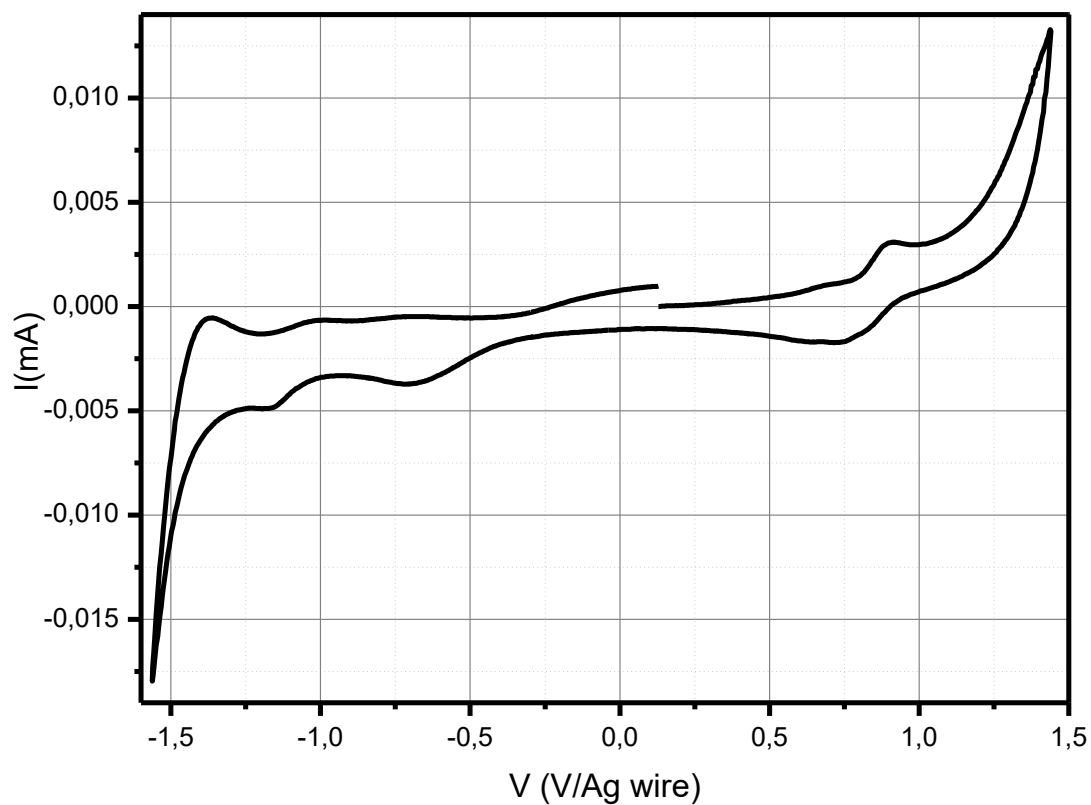

Compound A-D-A11

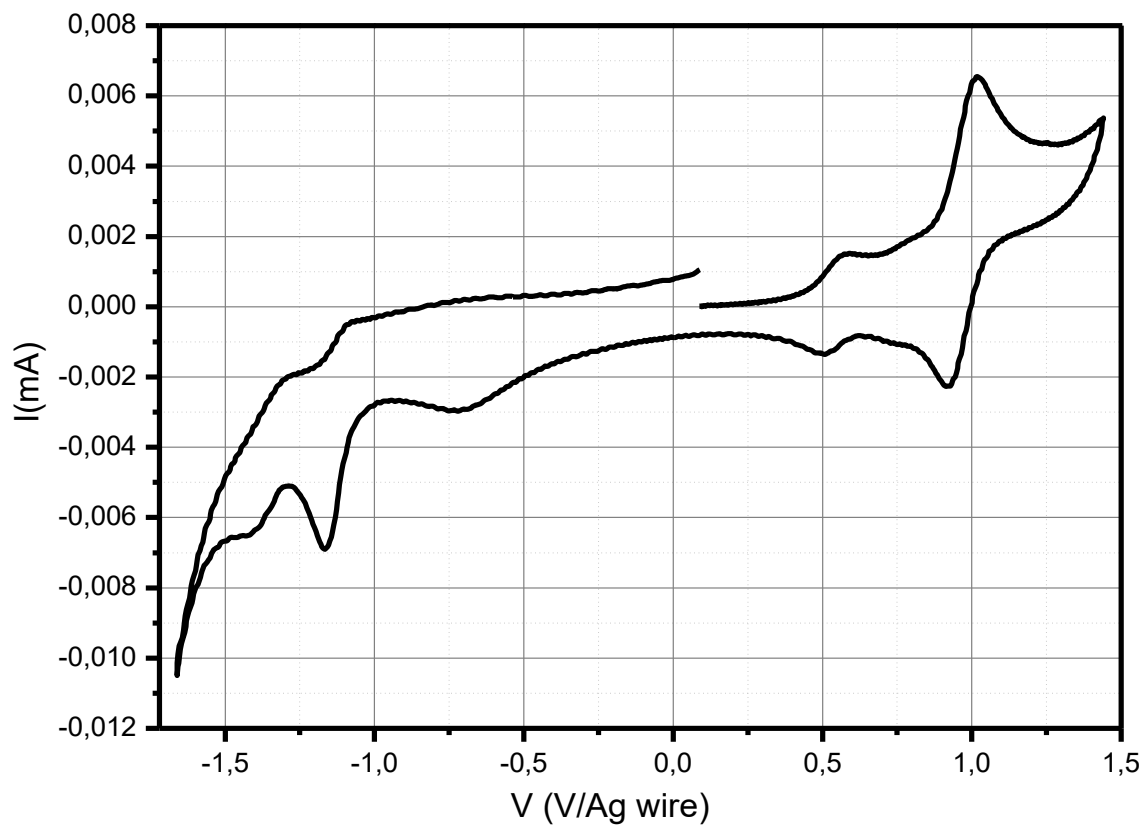

## Optimized geometries and HOMO LUMO electronic distributions of all compounds

Computational details: All quantum mechanical calculations were computed using Gaussian Package [1]. All geometry optimizations were performed using density functional theory (DFT) with the global hybrid exchange-correlation functional B3LYP [2] and all minima on the potential energy surface were verified via a calculation of vibrational frequencies, ensuring no imaginary frequencies were present. The Pople double-zeta basis set with a double set of polarization functions on non-hydrogen atoms (6-3111G(d,p))[3,4] was used throughout. This computational approach was chosen in consistency with previous works, as it provides good agreement with experimental data. Excited states were probed using time dependent density functional theory (TD-DFT) using the same functional. All transitions (singlet-singlet) were calculated vertically with respect to the singlet ground state geometry. Solvent effects were taken into account by using the implicit polarizable continuum model (PCM) [5,6]. DCM where chosen in analogy with the experiments. Computed spectra were simulated by convoluting each transition with Gaussians functions-centered on each absorption maximum- using a constant full width at half maximum (FWHM) value of 0.2 eV. The assignment of electronic transitions for  $\lambda_{\max}$  has been determined with GaussSum 3.0 software [7]

1. Frisch, M.J.; Trucks, G.W.; Schlegel, H.B.; Scuseria, G.E.; Robb, M.A.; Cheeseman, J.R.; Montgomery, Jr., J.A.; Vreven, T.; Kudin, K.N.; Burant, J.C.; Millam, J.M.; Iyengar, S.S.; Tomasi, J.; Barone, V.; Mennucci, B.; Cossi, M.; Scalmani, G.; Rega, N.; Petersson, G.A.; Nakatsuji, H.; Hada, M.; Ehara, M.; Toyota, K.; Fukuda, R.; Hasegawa, J.; Ishida, M.; Nakajima, T.; Honda, Y.; Kitao, O.; Nakai, H.; Klene, M.; Li, X.; Knox, J.E.; Hratchian, H.P.; Cross, J.B.; Bakken, V.; Adamo, C.; Jaramillo, J.; Gomperts, R.; Stratmann, R.E.; Yazyev, O.; Austin, A.J.; Cammi, R.; Pomelli, C.; Ochterski, J.W.; Ayala, P.Y.; Morokuma, K.; Voth, G.A.; Salvador, P.; Dannenberg, J.J.; Zakrzewski, V.G.; Dapprich, S.; Daniels, A. D.; Strain, M.C.; Farkas, O.; Malick, D.K.; Rabuck, A.D.; Raghavachari, K.; Foresman, J.B.; Ortiz, J.V.; Cui, Q.; Baboul, A.G.; Clifford, S.; Cioslowski, J.; Stefanov, B.B.; Liu, G.; Liashenko, A.; Piskorz, P.; Komaromi, I.; Martin, R.L.; Fox, D.J.; Keith, T.; Al-Laham, M.A.; Peng, C.Y.; Nanayakkara, A.; Challacombe, M.; Gill, P.M.W.; Johnson, B.; Chen, W.; Wong, M.W.; Gonzalez, C.; Pople, J.A. Gaussian, Inc., Wallingford CT, **2009**
2. Lee, C.; Yang, W.; Parr, R.G. Development of the Colle-Salvetti correlation-energy formula into a functional of the electron density. *Phys. Rev. B. Condens. Matter.* **1988**, *37*, 785-789 <https://doi.org/10.1103/PhysRevB.37.785>
3. Becke, A.D. A new mixing of Hartree-Fock and local density-functional theories *J. Chem. Phys.* **1993**, *98*, 1372-1377 <https://doi.org/10.1063/1.464304>
4. Hehre, W.J.; Ditchfield, R.; Pople, J.A. Self-consistent molecular orbital methods. XII. Further extensions of Gaussian-type basis sets for use in molecular orbital studies of organic molecules. *J. Chem. Phys.* **1972**, *56*, 2257-2261 <https://doi.org/10.1063/1.1677527>
5. Tomasi, J.; Mennucci, B.; Cancès, E. The IEF version of the PCM solvation method: an overview of a new method addressed to study molecular solutes at the QM ab initio level. *J. Mol. Struct. THEOCHEM* **1999**, *464*, 211-226 [https://doi.org/10.1016/S0166-1280\(98\)00553-3](https://doi.org/10.1016/S0166-1280(98)00553-3)
6. Scalmani, G.; Frisch, M.J. Continuous surface charge polarizable continuum models of solvation. I. General formalism. *J. Chem. Phys.* **2010**, *132*, 114110 <https://doi.org/10.1063/1.3359469>
7. O'Boyle, N.M.; Tenderholt, A.L.; Langner, K.M. cclib: A library for package-independent computational chemistry algorithms. *J. Comp. Chem.* **2008**, *29*, 839-845 <https://doi.org/10.1002/jcc.20823>



Compound D-A0

D-A0

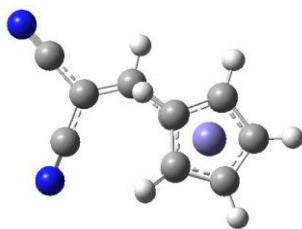

Homo

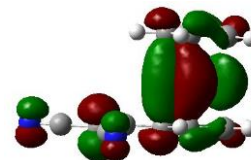

Lumo

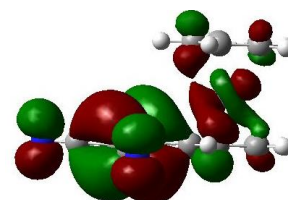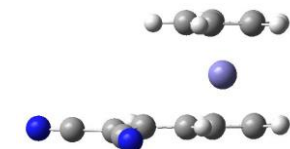

Compound D-A1

D-A1

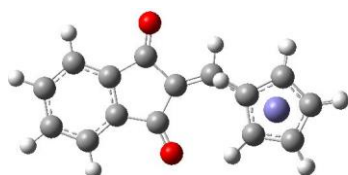

Homo

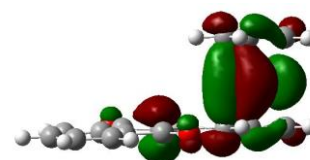

Lumo

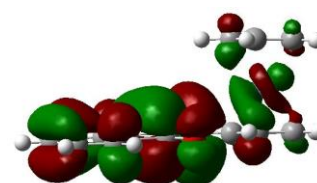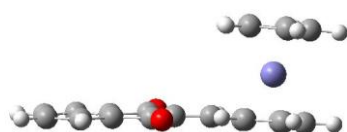

Compound D-A2

D-A2

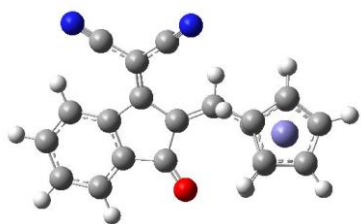

Homo

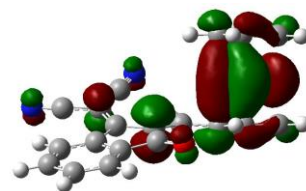

Lumo

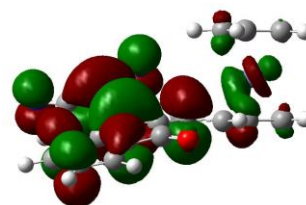

Compound D-A3

D-A3

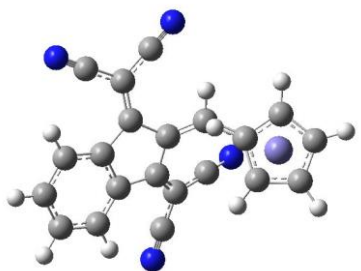

Homo

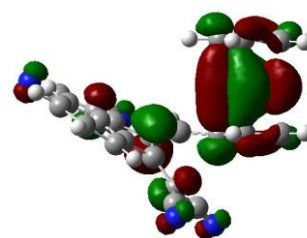

Lumo

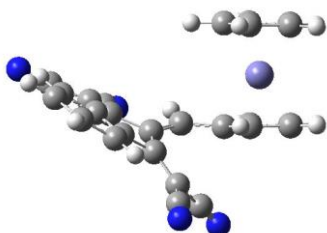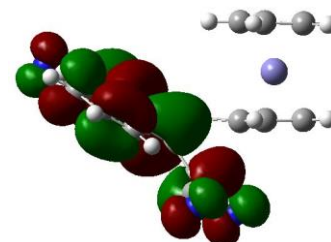

Compound D-A4

D-A4

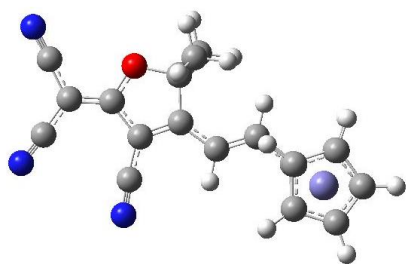

Homo

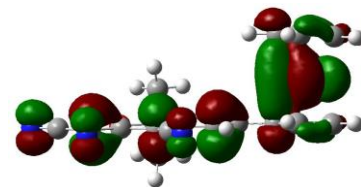

Lumo

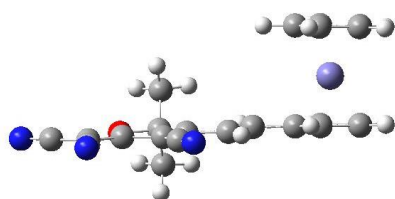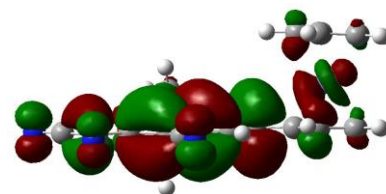

Compound D-A5

D-A5

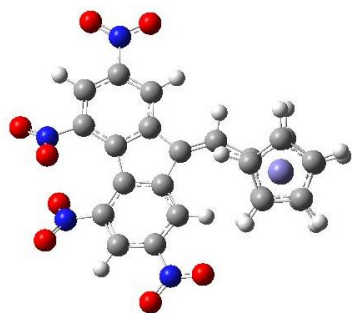

Homo

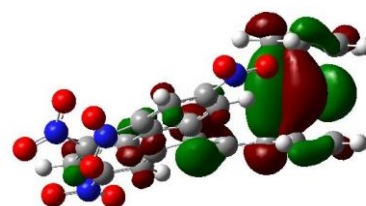

Lumo

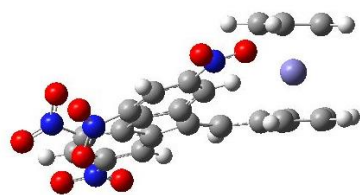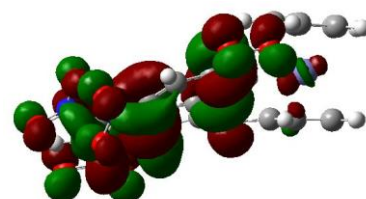

Compound D-A6

D-A6

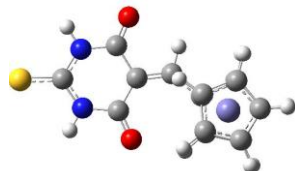

Homo

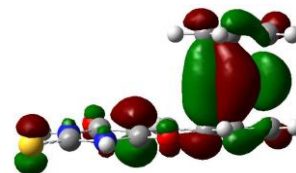

Lumo

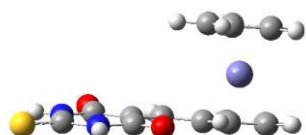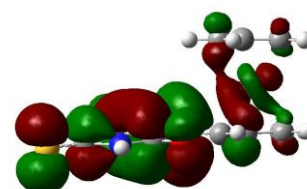

Compound D-A7

D-A7

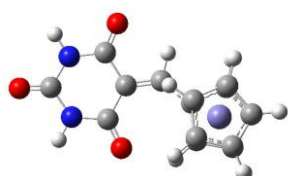

Homo

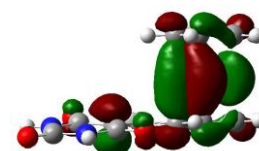

Lumo

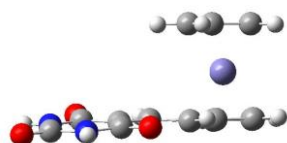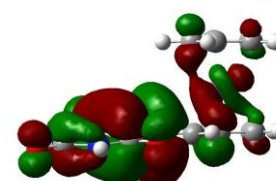

Compound D-A8

D-A8

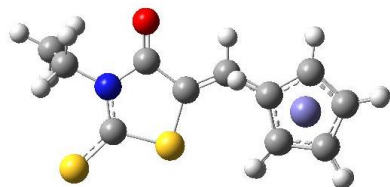

Homo

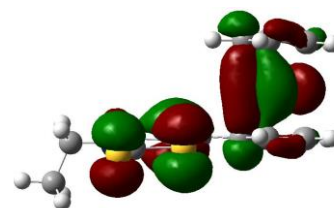

Lumo

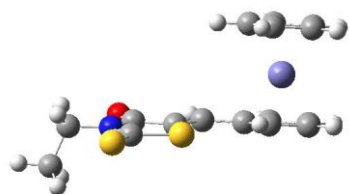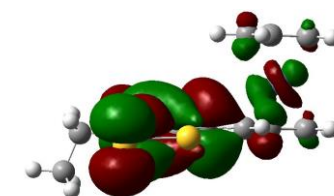

Compound D-A9

D-A9

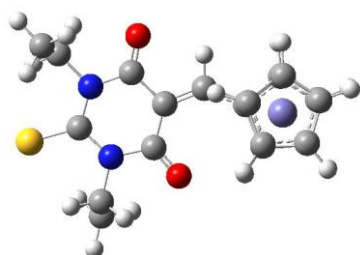

Homo

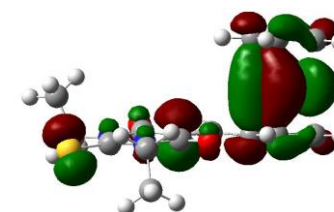

Lumo

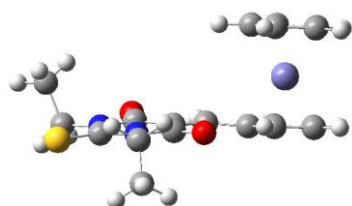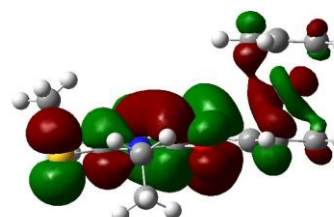

Compound D-A10

D-A10

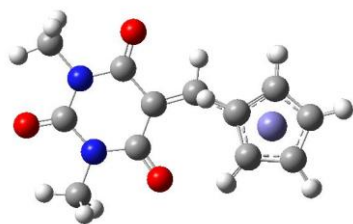

Homo

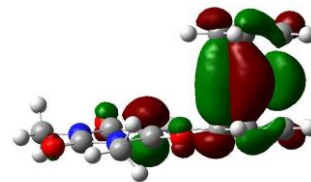

Lumo

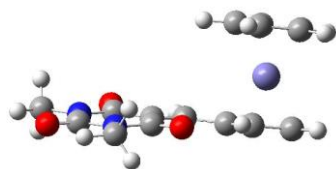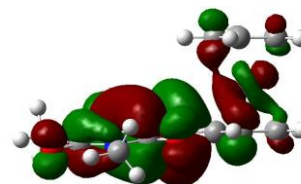

Compound D-A11

D-A11

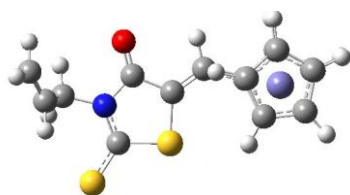

Homo

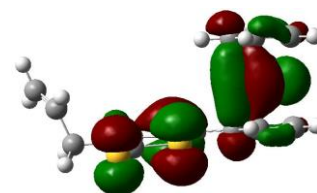

Lumo

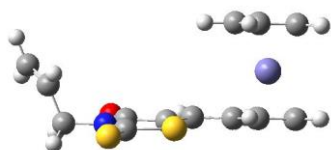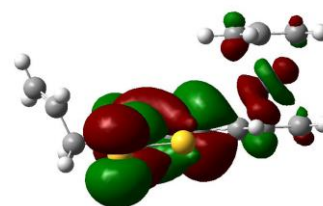

## Compound A-D-A0

A-D-A0

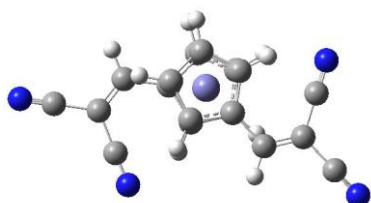

Homo

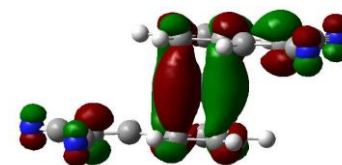

Lumo

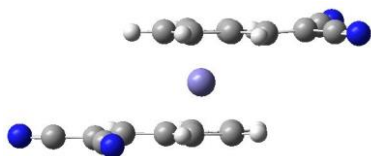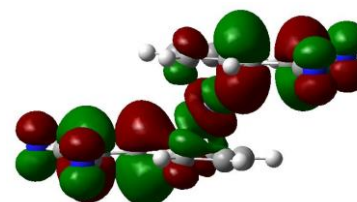

## Compound A-D-A1

A-D-A1

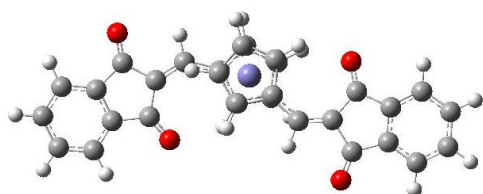

Homo

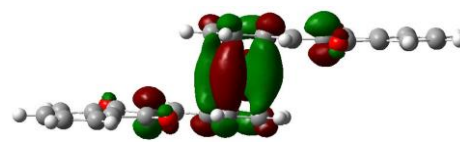

Lumo

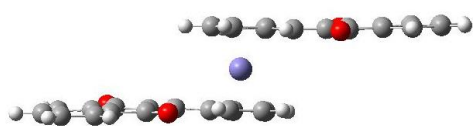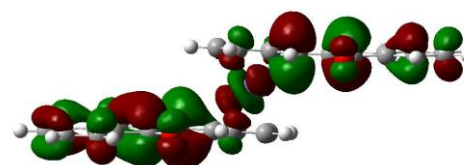

## Compound A-D-A2

A-D-A2

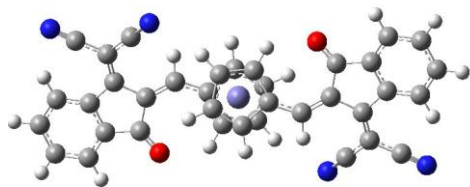

Homo

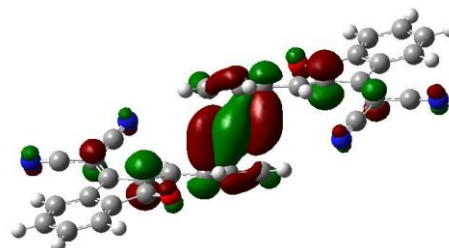

Lumo

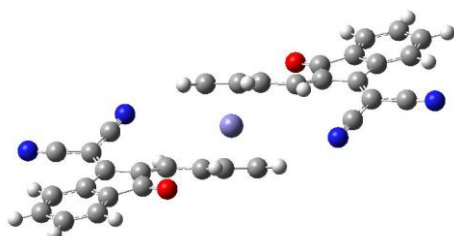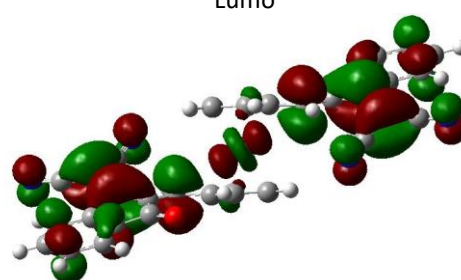

## Compound A-D-A3

A-D-A3

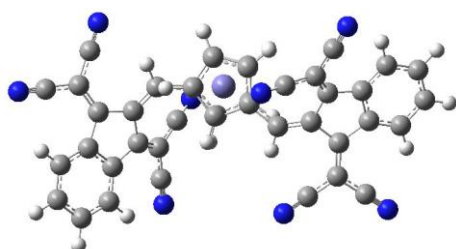

Homo

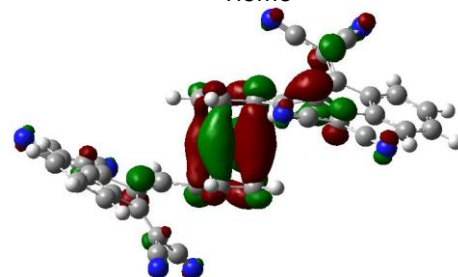

Lumo

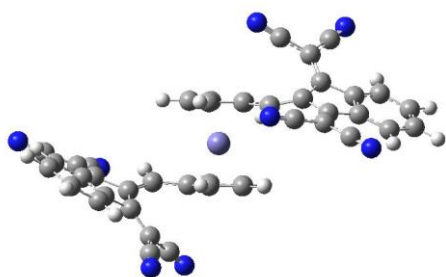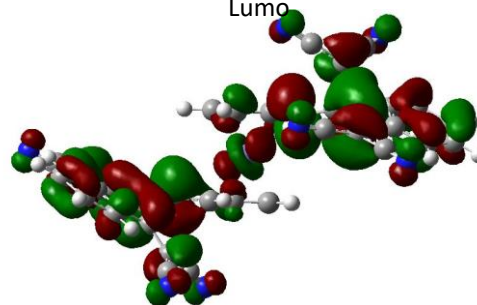



## Compound A-D-A4

A-D-A4

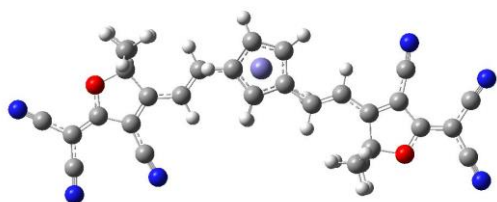

Homo

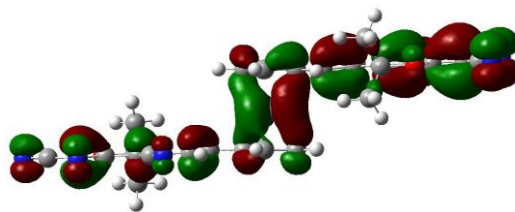

Lumo

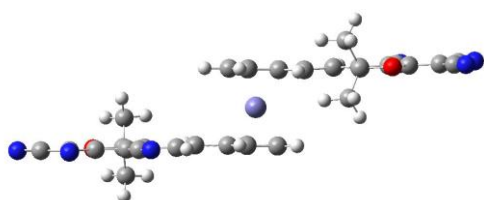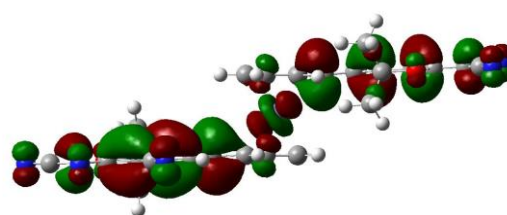

## Compound A-D-A5

A-D-A5

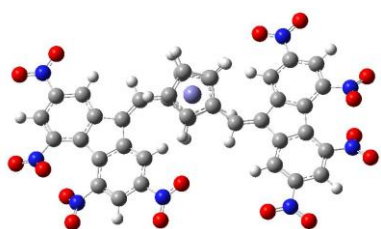

Homo-1

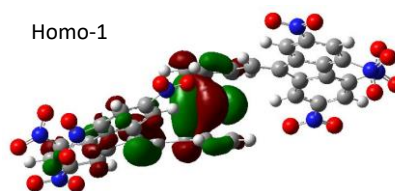

Homo

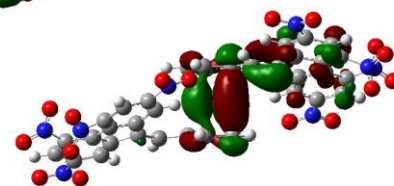

Lumo

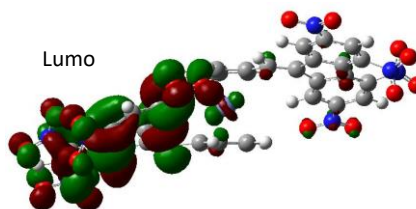

Lumo+1

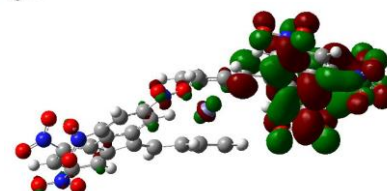

## Compound A-D-A6

A-D-A6

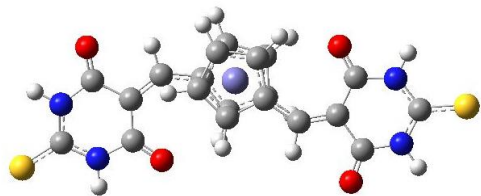

Homo

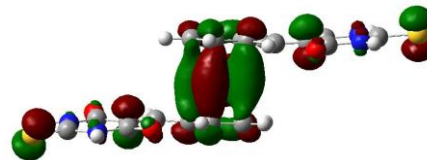

Lumo

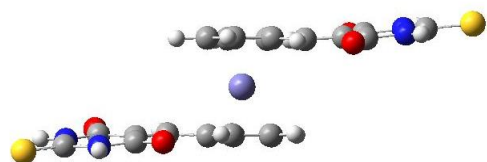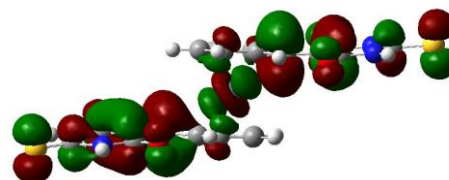

## Compound A-D-A7

A-D-A7

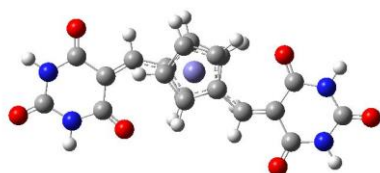

Homo

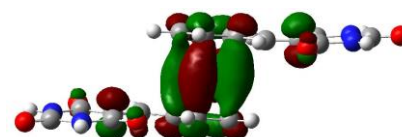

Lumo

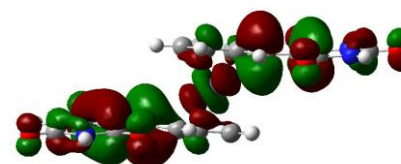

## Compound A-D-A8

A-D-A8

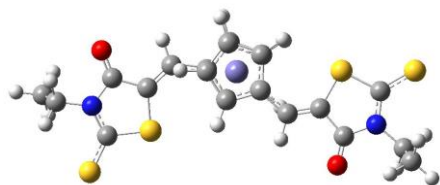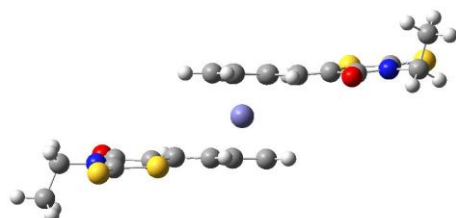

Homo-1

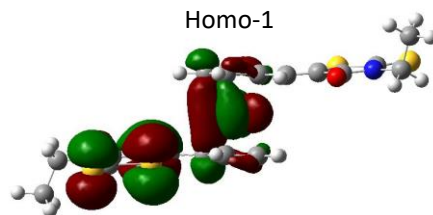

Homo

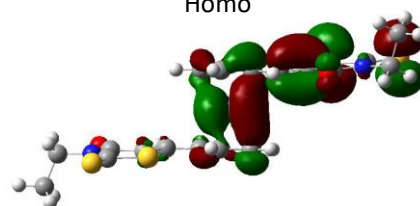

Lumo

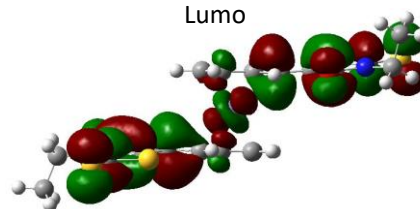

## Compound A-D-A9

A-D-A9

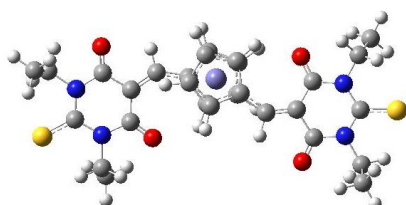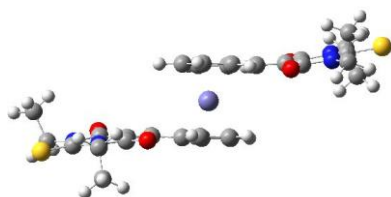

Homo - 1

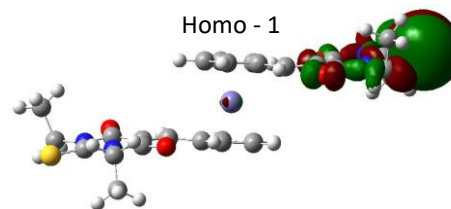

Homo

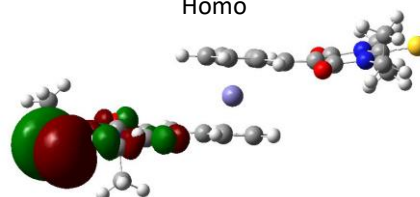

Lumo

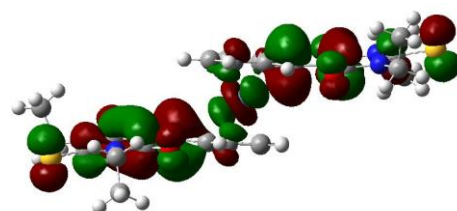

## Compound A-D-A10

A-D-A10

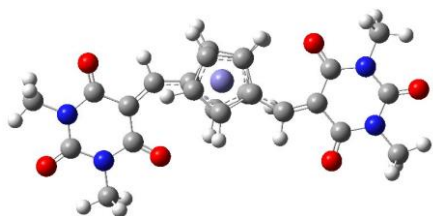

Homo

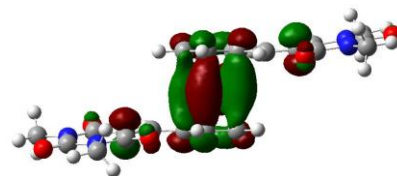

Lumo

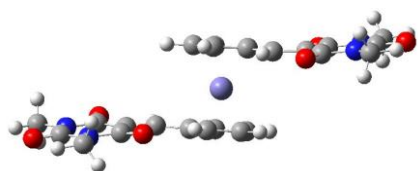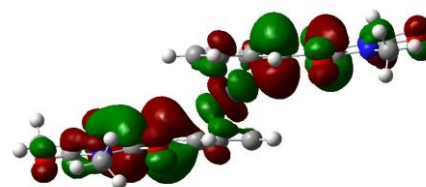

## Compound A-D-A11

A-D-A11

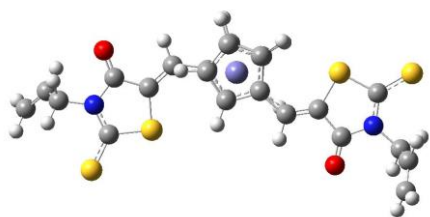

Homo-1

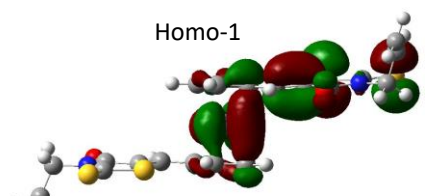

Homo

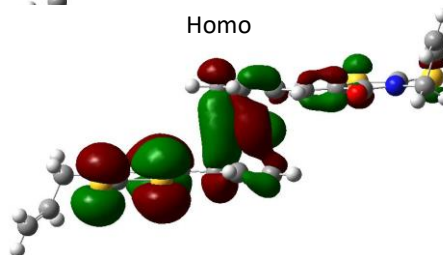

Lumo

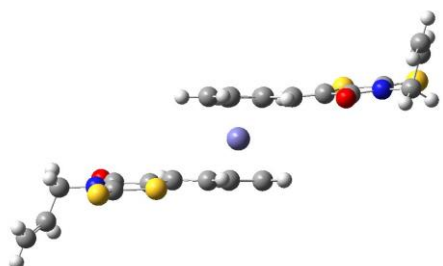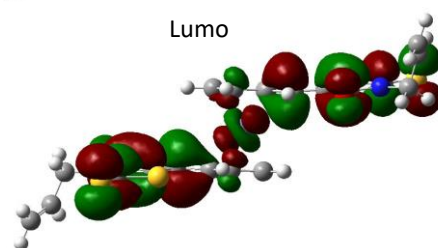

### Energy levels of D-A0-D-A-11

|      | <b>Homo-1</b> | <b>Homo</b> | <b>Lumo</b> | <b>Lumo+1</b> |
|------|---------------|-------------|-------------|---------------|
| AD0  | -6,400        | -6,326      | -2,773      | -1,208        |
| AD1  | -5,961        | -5,887      | -2,657      | -2,240        |
| AD2  | -6,170        | -6,071      | -3,291      | -2,789        |
| AD3  | -6,478        | -6,360      | -3,613      | -3,549        |
| AD4  | -6,493        | -6,336      | -3,459      | -1,437        |
| AD5  | -6,573        | -6,474      | -4,150      | -3,479        |
| AD6  | -6,283        | -6,207      | -3,020      | -1,260        |
| AD7  | -6,210        | -6,145      | -2,793      | -1,011        |
| AD8  | -6,056        | -5,908      | -2,586      | -1,202        |
| AD9  | -6,107        | -6,063      | -2,840      | -1,083        |
| AD10 | -6,074        | -6,009      | -2,613      | -0,886        |
| AD11 | -6,065        | -5,920      | -2,602      | -1,234        |

### Energy levels of A-D-A0-A-D-A-11

|       | <b>Homo-1</b> | <b>Homo</b> | <b>Lumo</b> | <b>Lumo+1</b> |
|-------|---------------|-------------|-------------|---------------|
| ADA0  | -7,065        | -7,015      | -3,465      | -3,060        |
| ADA1  | -6,249        | -6,185      | -2,983      | -2,675        |
| ADA2  | -6,561        | -6,401      | -3,577      | -3,423        |
| ADA3  | -6,933        | -6,901      | -3,963      | -3,889        |
| ADA4  | -6,930        | -6,877      | -3,983      | -3,749        |
| ADA5  | -6,573        | -6,474      | -4,150      | -3,479        |
| ADA6  | -6,771        | -6,709      | -3,531      | -3,185        |
| ADA7  | -6,697        | -6,629      | -3,312      | -2,922        |
| ADA8  | -6,275        | -6,273      | -2,934      | -2,695        |
| ADA9  | -6,306        | -6,299      | -3,264      | -2,921        |
| ADA10 | -6,459        | -6,392      | -3,049      | -2,664        |
| ADA11 | -6,291        | -6,289      | -2,951      | -2,711        |

### Simulated absorption spectra of D-A0-D-A-11 in the 300-1000 nm range

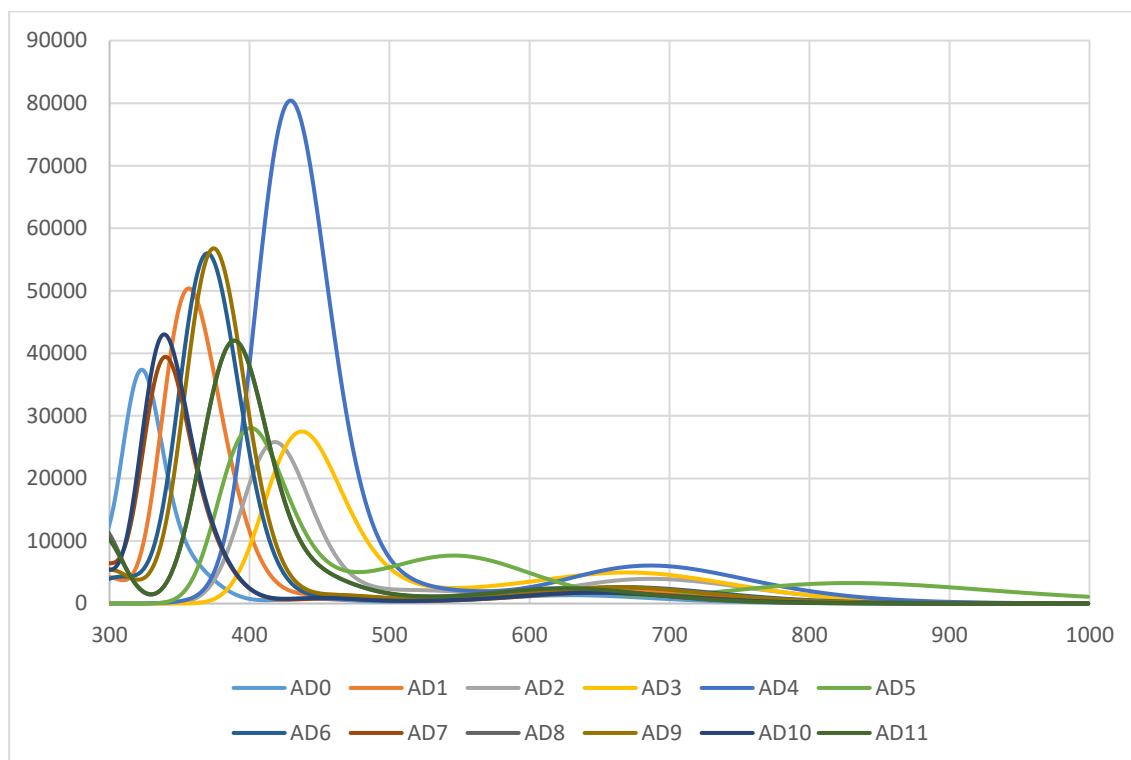

### Simulated absorption spectra of A-D-A0-A-D-A-11 in the 300-1000 nm range

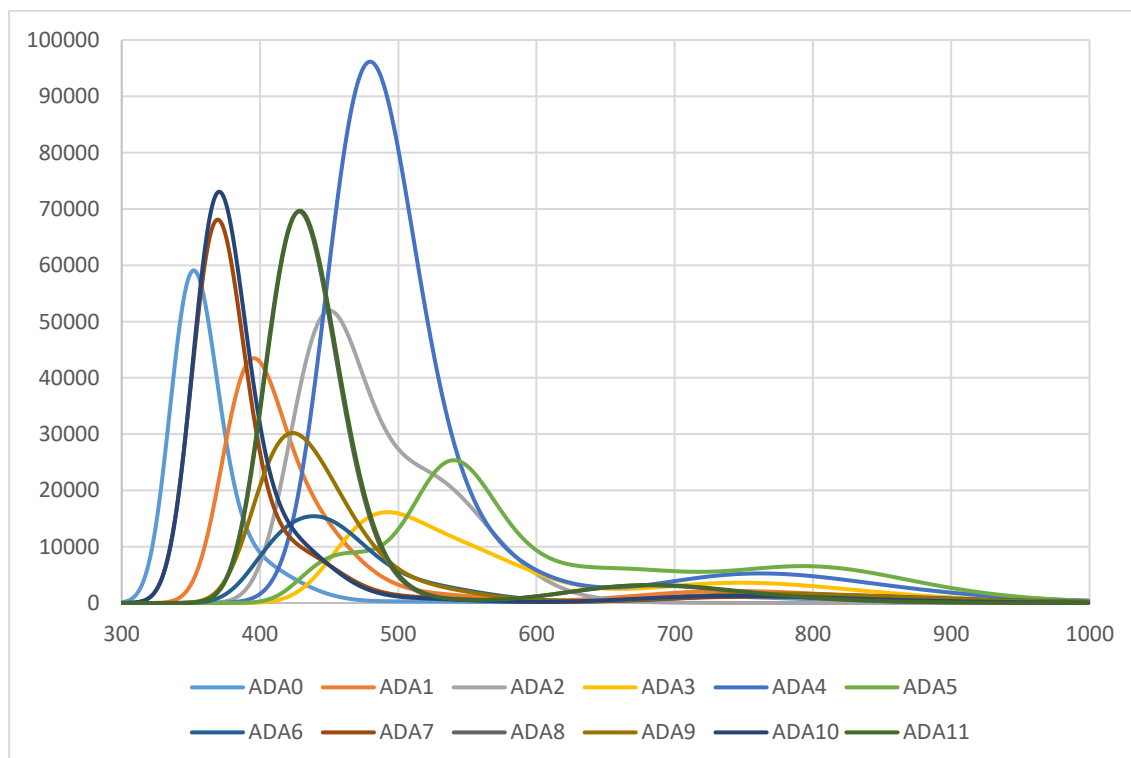

Main transitions involved in the different absorption bands observed in the simulated UV-visible absorption spectra of D-A dyads **D-A<sub>x</sub>**, **x = 0-11** and A-D-A triads **A-D-A<sub>x</sub>**, **x = 0-11**.

| <b>AD 0</b> |                 |                |                                                                                  |                                                  |
|-------------|-----------------|----------------|----------------------------------------------------------------------------------|--------------------------------------------------|
| No.         | Wavelength (nm) | Osc. Strengt h | Major contribs                                                                   | Minor contribs                                   |
| 1           | 669.316524575   | 0.0004         | H-1->LUMO (64%), H-1->L+2 (24%)                                                  | HOMO->L+1 (9%)                                   |
| 2           | 632.15312809    | 0.019          | H-1->L+1 (13%), HOMO->LUMO (51%),<br>HOMO->L+2 (31%)                             |                                                  |
| 3           | 536.333404041   | 0.0039         | H-3->LUMO (11%), H-3->L+2 (10%), H-2->LUMO (24%), H-2->L+2 (20%), H-1->L+1 (29%) |                                                  |
| 4           | 500.299382666   | 0.0001         | H-2->L+1 (24%), HOMO->L+1 (62%)                                                  | H-3->L+1 (5%), H-1->LUMO (6%)                    |
| 5           | 443.243933263   | 0.011          | H-2->LUMO (20%), H-1->L+1 (41%),<br>HOMO->LUMO (27%)                             | H-3->LUMO (3%), H-2->L+2 (3%), HOMO->L+2 (3%)    |
| 6           | 422.505343371   | 0.0005         | H-3->L+1 (10%), H-2->L+1 (22%), H-1->LUMO (27%), H-1->L+2 (34%)                  | HOMO->L+1 (4%)                                   |
| 7           | 359.27033617    | 0.0717         | H-1->L+1 (11%), HOMO->LUMO (15%),<br>HOMO->L+2 (58%)                             | H-3->LUMO (5%), H-2->LUMO (8%)                   |
| 8           | 352.227821057   | 0.0005         | H-3->L+1 (12%), H-2->L+1 (22%), H-1->L+2 (39%), HOMO->L+1 (21%)                  |                                                  |
| 9           | 324.684944776   | 0.391          | H-3->LUMO (32%), H-2->LUMO (40%),<br>H-2->L+2 (10%)                              | H-5->LUMO (4%), H-4->LUMO (4%), H-3->L+2 (5%)    |
| 10          | 319.934438656   | 0.0315         | H-4->LUMO (38%), H-3->LUMO (20%),<br>H-2->L+2 (25%)                              | H-3->L+2 (7%), H-2->LUMO (3%),<br>HOMO->L+2 (2%) |
| 11          | 317.720813398   | 0.138          | H-4->LUMO (55%), H-3->LUMO (26%),<br>H-2->L+2 (11%)                              | H-3->L+2 (3%)                                    |
| 12          | 285.316288142   | 0.0244         | H-6->LUMO (63%), H-5->LUMO (29%)                                                 | H-6->L+2 (3%)                                    |
| 13          | 284.19793933    | 0.1047         | H-6->LUMO (30%), H-5->LUMO (60%)                                                 | H-2->LUMO (2%)                                   |
| 14          | 260.695542405   | 0.0001         | HOMO->L+3 (94%)                                                                  | H-3->L+3 (2%), H-2->L+3 (3%)                     |
| 15          | 251.892877049   | 0.0007         | H-1->L+3 (99%)                                                                   |                                                  |
| 16          | 246.788735867   | 0.0004         | H-3->L+1 (68%), H-2->L+1 (26%)                                                   |                                                  |
| 17          | 241.684586768   | 0.0            | HOMO->L+4 (97%)                                                                  |                                                  |
| 18          | 239.462671918   | 0.0174         | H-4->L+1 (39%), H-3->L+2 (40%), H-2->L+2 (15%)                                   |                                                  |
| 19          | 238.499938467   | 0.0002         | H-1->L+4 (97%)                                                                   |                                                  |
| 20          | 236.900399366   | 0.0005         | H-5->L+1 (72%), H-4->L+2 (11%)                                                   | H-7->L+1 (2%), H-6->L+2 (6%)                     |

| AD 1 |                 |               |                                                                                     |                                                                                              |
|------|-----------------|---------------|-------------------------------------------------------------------------------------|----------------------------------------------------------------------------------------------|
| No.  | Wavelength (nm) | Osc. Strength | Major contribs                                                                      | Minor contribs                                                                               |
| 1    | 689.222263673   | 0.0003        | H-1->LUMO (64%), H-1->L+2 (18%)                                                     | H-1->L+4 (8%), HOMO->L+3 (7%)                                                                |
| 2    | 653.063961086   | 0.0347        | H-1->L+3 (10%), HOMO->LUMO (54%), HOMO->L+2 (19%), HOMO->L+4 (11%)                  |                                                                                              |
| 3    | 542.481702088   | 0.007         | H-3->LUMO (15%), H-2->LUMO (19%), H-2->L+2 (11%), H-1->L+3 (29%)                    | H-3->L+2 (9%), H-3->L+4 (5%), H-2->L+4 (7%)                                                  |
| 4    | 505.913383981   | 0.0001        | H-2->L+3 (19%), HOMO->L+3 (63%)                                                     | H-3->L+3 (6%), H-1->LUMO (7%)                                                                |
| 5    | 460.257602688   | 0.0188        | H-2->LUMO (15%), H-1->L+3 (37%), HOMO->LUMO (29%)                                   | H-3->LUMO (4%), HOMO->L+2 (3%), HOMO->L+4 (5%)                                               |
| 6    | 437.10274286    | 0.0003        | H-3->L+3 (14%), H-2->L+3 (18%), H-1->LUMO (25%), H-1->L+2 (17%), H-1->L+4 (20%)     |                                                                                              |
| 7    | 417.975906052   | 0.0022        | HOMO->L+1 (98%)                                                                     |                                                                                              |
| 8    | 403.135077263   | 0.0           | H-1->L+1 (98%)                                                                      |                                                                                              |
| 9    | 381.70122841    | 0.0086        | H-4->LUMO (84%)                                                                     | H-10->L+1 (3%), H-9->L+1 (2%), H-4->L+1 (4%)                                                 |
| 10   | 378.415923002   | 0.2201        | H-2->LUMO (21%), H-1->L+3 (13%), HOMO->LUMO (14%), HOMO->L+2 (28%), HOMO->L+4 (19%) |                                                                                              |
| 11   | 363.078929988   | 0.0003        | H-10->LUMO (5%), H-9->LUMO (5%), H-4->LUMO (5%)                                     |                                                                                              |
| 12   | 356.153605114   | 0.0001        | H-4->L+1 (79%)                                                                      |                                                                                              |
| 13   | 353.331983506   | 0.6318        | H-3->L+3 (19%), H-2->L+3 (19%), H-1->L+2 (19%), H-1->L+4 (15%), HOMO->L+3 (23%)     |                                                                                              |
| 14   | 338.87499115    | 0.0176        | H-3->LUMO (57%), H-2->LUMO (31%)                                                    | H-4->LUMO (2%), HOMO->L+4 (2%)                                                               |
| 15   | 332.272586729   | 0.0033        | H-2->L+1 (85%)                                                                      | H-3->L+1 (8%)                                                                                |
| 16   | 330.74799395    | 0.0072        | H-5->LUMO (91%)                                                                     |                                                                                              |
| 17   | 313.764881721   | 0.0008        | H-3->LUMO (15%), H-3->L+4 (10%), H-2->L+2 (17%), H-2->L+4 (18%)                     | H-6->LUMO (3%), H-5->LUMO (5%), H-3->L+2 (8%), H-2->LUMO (9%), H-1->L+3 (5%), HOMO->L+2 (3%) |
| 18   | 302.267767839   | 0.0021        | H-3->L+1 (86%), H-2->L+1 (10%)                                                      |                                                                                              |
| 19   | 297.902864106   | 0.0566        | H-10->LUMO (39%), H-9->LUMO (49%), H-4->L+1 (11%)                                   |                                                                                              |
| 20   | 295.989765594   | 0.0026        | H-6->LUMO (84%)                                                                     | H-7->L+1 (4%)                                                                                |
|      |                 |               | H-10->LUMO (32%), H-10->L+1 (10%), H-9->LUMO (25%), H-8->LUMO (14%)                 | H-9->L+1 (9%)                                                                                |



| <b>AD 2</b> |                 |               |                                                                                  |                                                                                                           |
|-------------|-----------------|---------------|----------------------------------------------------------------------------------|-----------------------------------------------------------------------------------------------------------|
| No.         | Wavelength (nm) | Osc. Strength | Major contribs                                                                   | Minor contribs                                                                                            |
| 1           | 744.963005541   | 0.0004        | H-1->LUMO (57%), H-1->L+1 (19%), H-1->L+2 (12%)                                  | H-1->L+5 (6%), HOMO->L+3 (4%)                                                                             |
| 2           | 688.342177505   | 0.0577        | HOMO->LUMO (53%), HOMO->L+1 (14%), HOMO->L+2 (12%), HOMO->L+5 (10%)              | H-1->L+3 (6%)                                                                                             |
| 3           | 557.232328145   | 0.0121        | H-3->LUMO (18%), H-3->L+2 (11%), H-2->LUMO (15%), H-1->L+3 (19%)                 | H-3->L+1 (9%), H-3->L+5 (8%), H-2->L+1 (6%), H-2->L+2 (6%), H-2->L+5 (4%)                                 |
| 4           | 515.934388965   | 0.0183        | H-1->L+3 (10%), HOMO->LUMO (37%), HOMO->L+1 (24%)                                | H-1->LUMO (2%), HOMO->L+2 (5%), HOMO->L+3 (8%), HOMO->L+5 (6%)                                            |
| 5           | 512.861191364   | 0.0023        | H-1->LUMO (18%), HOMO->L+3 (45%)                                                 | H-3->L+3 (2%), H-2->L+3 (7%), H-1->L+1 (3%), H-1->L+2 (3%), H-1->L+3 (4%), H-1->L+5 (5%), HOMO->LUMO (5%) |
| 6           | 482.35369208    | 0.0003        | H-3->L+3 (12%), H-2->L+3 (12%), H-1->LUMO (22%), H-1->L+1 (30%), HOMO->L+3 (11%) | H-1->L+2 (6%), H-1->L+5 (5%)                                                                              |
| 7           | 463.630966316   | 0.0098        | H-2->LUMO (15%), H-1->L+3 (34%), HOMO->L+1 (40%)                                 | H-3->LUMO (2%)                                                                                            |
| 8           | 433.026659026   | 0.0003        | H-3->L+3 (14%), H-1->L+1 (45%), H-1->L+2 (10%), H-1->L+5 (17%)                   | H-2->L+3 (8%)                                                                                             |
| 9           | 418.102761895   | 0.3765        | H-3->LUMO (14%), H-2->LUMO (63%), HOMO->L+1 (10%)                                |                                                                                                           |
| 10          | 388.458166533   | 0.0093        | H-3->LUMO (41%), HOMO->L+2 (17%), HOMO->L+5 (16%)                                | H-3->L+5 (3%), H-1->L+3 (7%), HOMO->L+1 (6%)                                                              |

| <b>AD 3</b> |                 |               |                                                                                 |                                                            |
|-------------|-----------------|---------------|---------------------------------------------------------------------------------|------------------------------------------------------------|
| No.         | Wavelength (nm) | Osc. Strength | Major contribs                                                                  | Minor contribs                                             |
| 1           | 746.892728989   | 0.0004        | H-1->L+1 (76%), H-1->L+2 (11%)                                                  | H-1->L+4 (3%), HOMO->L+3 (3%)                              |
| 2           | 683.108501445   | 0.065         | HOMO->L+1 (67%), HOMO->L+2 (11%)                                                | H-1->L+3 (4%), HOMO->L+4 (5%), HOMO->L+6 (3%)              |
| 3           | 597.571780471   | 0.0205        | HOMO->LUMO (97%)                                                                |                                                            |
| 4           | 563.359655635   | 0.004         | H-1->LUMO (85%)                                                                 | H-3->L+1 (4%), H-1->L+3 (3%)                               |
| 5           | 553.007105318   | 0.01          | H-3->L+1 (27%), H-3->L+2 (11%), H-2->L+1 (16%), H-1->LUMO (13%), H-1->L+3 (10%) | H-3->L+4 (4%), H-3->L+6 (3%), H-2->L+2 (3%), H-1->L+4 (2%) |

|    |               |        |                                                                                 |                                                                                                                          |
|----|---------------|--------|---------------------------------------------------------------------------------|--------------------------------------------------------------------------------------------------------------------------|
| 6  | 507.1757875   | 0.001  | HOMO->L+3 (48%)                                                                 | H-3->L+3 (4%), H-2->L+3 (8%), H-1->L+1 (9%), H-1->L+2 (4%), H-1->L+4 (2%), H-1->L+6 (3%), HOMO->L+4 (9%), HOMO->L+5 (3%) |
| 7  | 492.371998778 | 0.021  | H-1->L+3 (33%),<br>HOMO->L+1 (20%)                                              | H-3->L+1 (5%), H-2->L+1 (5%), H-1->L+4 (7%), H-1->L+5 (2%), HOMO->L+2 (9%), HOMO->L+4 (5%),<br>HOMO->L+6 (4%)            |
| 8  | 462.420531897 | 0.0067 | H-3->L+3 (20%), H-2->LUMO (10%), H-1->L+1 (11%), H-1->L+2 (15%), H-1->L+4 (10%) | H-3->L+4 (3%), H-2->L+3 (9%), H-1->L+5 (4%), H-1->L+6 (8%)                                                               |
| 9  | 452.860665542 | 0.0881 | H-2->LUMO (77%)                                                                 | H-4->LUMO (5%), H-3->L+3 (2%)                                                                                            |
| 10 | 433.072035391 | 0.3293 | H-2->L+1 (67%)                                                                  | H-3->L+1 (6%), H-2->LUMO (4%), H-1->L+3 (3%), HOMO->L+1 (6%),<br>HOMO->L+2 (3%)                                          |

#### AD 4

| No. | Wavelength (nm) | Osc. Strength | Major contribs                                                                                        | Minor contribs                                                                                      |
|-----|-----------------|---------------|-------------------------------------------------------------------------------------------------------|-----------------------------------------------------------------------------------------------------|
| 1   | 736.160747015   | 0.0005        | H-1->LUMO (74%), H-1->L+3 (12%)                                                                       | H-1->L+1 (4%), H-1->L+2 (4%),<br>HOMO->L+2 (3%)                                                     |
| 2   | 687.578710139   | 0.089         | HOMO->LUMO (62%),<br>HOMO->L+3 (14%)                                                                  | H-2->LUMO (4%), H-1->L+2 (4%),<br>HOMO->L+1 (4%), HOMO->L+2 (4%)                                    |
| 3   | 553.179819802   | 0.0187        | H-3->LUMO (36%), H-3->L+3 (18%), H-1->L+2 (18%)                                                       | H-3->L+1 (5%), H-3->L+2 (5%),<br>H-2->LUMO (6%), H-1->L+3 (5%)                                      |
| 4   | 512.140910456   | 0.0001        | H-3->L+2 (7%), H-3->L+3 (2%),<br>H-2->L+2 (9%), H-2->L+3 (3%),<br>HOMO->L+2 (48%),<br>HOMO->L+3 (14%) | H-1->LUMO (9%), H-1->L+3 (4%)                                                                       |
| 5   | 488.453661948   | 0.0367        | H-3->LUMO (10%), H-1->L+2 (31%), HOMO->LUMO (22%), HOMO->L+3 (13%)                                    | H-2->LUMO (6%), H-1->L+3 (9%),<br>HOMO->L+2 (3%)                                                    |
| 6   | 457.793423964   | 0.0001        | H-3->L+2 (26%), H-1->LUMO (15%), H-1->L+3 (29%)                                                       | H-3->L+3 (8%), H-2->L+2 (4%),<br>H-1->L+1 (4%), H-1->L+2 (7%),<br>H-1->L+6 (4%)                     |
| 7   | 429.456851445   | 1.1775        | H-2->LUMO (76%),<br>HOMO->LUMO (11%)                                                                  | H-1->L+2 (2%), HOMO->L+3 (3%)                                                                       |
| 8   | 395.35775833    | 0.0309        | H-3->LUMO (35%), H-1->L+2 (11%), HOMO->L+3 (23%)                                                      | H-3->L+3 (3%), H-2->LUMO (6%),<br>H-1->L+3 (4%), HOMO->LUMO (3%),<br>HOMO->L+1 (6%), HOMO->L+2 (6%) |
| 9   | 362.951384696   | 0.0017        | H-5->LUMO (51%), H-3->L+2 (14%)                                                                       | H-4->LUMO (4%), H-3->L+3 (4%),<br>H-1->L+2 (2%), H-1->L+3 (8%),<br>HOMO->L+2 (8%), HOMO->L+3 (3%)   |
| 10  | 357.622639858   | 0.002         | H-5->LUMO (39%), H-3->L+2 (17%), H-1->L+3 (10%), HOMO->L+2 (10%)                                      | H-7->LUMO (3%), H-4->LUMO (4%),<br>H-3->L+3 (4%), H-1->L+1                                          |

(3%), H-1->L+2 (4%), HOMO->L+3 (4%)

**AD 5**

| No. | Wavelength (nm) | Osc. Strength | Major contribs                                                                                           | Minor contribs                                                                                                                                                |
|-----|-----------------|---------------|----------------------------------------------------------------------------------------------------------|---------------------------------------------------------------------------------------------------------------------------------------------------------------|
| 1   | 833.507179914   | 0.0162        | H-1->LUMO (47%), HOMO->LUMO (32%)                                                                        | H-1->L+1 (4%), H-1->L+4 (7%), H-1->L+8 (4%)<br>H-1->L+1 (2%), H-1->L+4 (4%), H-1->L+8 (2%), HOMO->L+8 (3%)                                                    |
| 2   | 828.660560167   | 0.0323        | H-1->LUMO (27%), HOMO->LUMO (57%)<br>HOMO->LUMO (10%), HOMO->L+1 (25%), HOMO->L+4 (29%), HOMO->L+8 (20%) | H-2->LUMO (3%), H-1->L+7 (8%)                                                                                                                                 |
| 3   | 642.338581557   | 0.0025        | H-1->LUMO (25%), H-1->L+1 (17%), H-1->L+4 (30%), H-1->L+8 (18%)                                          | HOMO->L+7 (8%)                                                                                                                                                |
| 4   | 629.713002246   | 0.0004        | H-3->LUMO (14%), H-3->L+4 (10%), H-3->L+8 (12%), H-2->LUMO (45%)                                         | H-3->L+1 (4%), H-2->L+8 (2%), H-1->L+7 (6%)                                                                                                                   |
| 5   | 580.722215514   | 0.0392        | H-3->LUMO (11%), H-2->LUMO (40%), H-1->L+7 (20%)                                                         | H-3->L+4 (3%), H-3->L+8 (5%), HOMO->L+1 (8%), HOMO->L+4 (2%), HOMO->L+8 (2%)<br>H-3->LUMO (5%), H-3->L+8 (2%), HOMO->L+2 (7%), HOMO->L+4 (9%), HOMO->L+8 (4%) |
| 6   | 547.294928102   | 0.0489        | H-2->LUMO (10%), HOMO->L+1 (58%)<br>H-1->L+1 (50%), HOMO->L+7 (32%)                                      | H-3->L+7 (3%), H-2->L+7 (5%), H-1->L+2 (3%), H-1->L+8 (5%)<br>H-1->L+7 (4%), HOMO->L+1 (5%)                                                                   |
| 7   | 536.914052539   | 0.0225        | H-2->LUMO (10%), HOMO->L+1 (58%)<br>H-1->L+1 (50%), HOMO->L+7 (32%)                                      | H-3->L+7 (3%), H-2->L+7 (5%), H-1->L+2 (3%), H-1->L+8 (5%)<br>H-1->L+7 (4%), HOMO->L+1 (5%)                                                                   |
| 8   | 520.3298347     | 0.0001        | H-2->LUMO (10%), HOMO->L+1 (58%)<br>H-1->L+1 (50%), HOMO->L+7 (32%)                                      | H-3->L+7 (3%), H-2->L+7 (5%), H-1->L+2 (3%), H-1->L+8 (5%)<br>H-1->L+7 (4%), HOMO->L+1 (5%)                                                                   |
| 9   | 502.978470638   | 0.0148        | HOMO->L+2 (85%)<br>H-3->L+7 (13%), H-1->L+1 (17%), H-1->L+2 (15%), H-1->L+4 (15%), HOMO->L+7 (24%)       | H-2->L+7 (9%)                                                                                                                                                 |
| 10  | 500.279195466   | 0.0           | H-3->LUMO (48%), H-1->L+7 (24%), HOMO->L+4 (14%)                                                         | H-3->L+8 (3%), H-1->L+2 (3%), HOMO->L+2 (2%)<br>H-3->LUMO (2%), H-3->L+7 (3%), H-1->L+1 (8%), H-1->L+8 (3%)                                                   |
| 11  | 481.1743432     | 0.0299        | H-3->LUMO (48%), H-1->L+7 (24%), HOMO->L+4 (14%)                                                         | H-3->L+8 (3%), H-1->L+2 (3%), HOMO->L+2 (2%)<br>H-3->LUMO (2%), H-3->L+7 (3%), H-1->L+1 (8%), H-1->L+8 (3%)                                                   |
| 12  | 476.917309737   | 0.0017        | H-1->L+2 (76%)                                                                                           | H-3->L+1 (3%), H-3->L+4 (8%), H-3->L+8 (5%), H-2->L+4 (5%), HOMO->L+3 (2%), HOMO->L+8 (5%)                                                                    |
| 13  | 457.236292271   | 0.0004        | HOMO->L+3 (94%)                                                                                          | H-3->L+1 (3%), H-3->L+4 (8%), H-3->L+8 (5%), H-2->L+4 (5%), HOMO->L+3 (2%), HOMO->L+8 (5%)                                                                    |
| 14  | 447.564049571   | 0.0011        | H-3->LUMO (13%), H-2->L+1 (23%), H-1->L+7 (13%), HOMO->L+4 (16%)                                         | H-3->L+7 (3%), H-1->L+2 (2%), H-1->L+4 (7%), H-1->L+8 (4%)                                                                                                    |
| 15  | 434.209543364   | 0.0001        | H-1->L+3 (81%)<br>H-4->LUMO (42%), H-3->L+7 (10%), H-1->L+3 (10%),                                       | H-2->L+1 (7%), H-2->L+7 (2%)                                                                                                                                  |
| 16  | 429.055587127   | 0.0011        | H-1->L+3 (81%)<br>H-4->LUMO (42%), H-3->L+7 (10%), H-1->L+3 (10%),                                       | H-2->L+1 (7%), H-2->L+7 (2%)                                                                                                                                  |

|    |               |        |                                                                                                      |                                                                                             |
|----|---------------|--------|------------------------------------------------------------------------------------------------------|---------------------------------------------------------------------------------------------|
| 17 | 428.595799959 | 0.0015 | H-1->L+4 (14%), H-1->L+8 (10%)<br>H-4->LUMO (48%), H-3->L+7 (10%), H-1->L+4 (16%),<br>H-1->L+8 (11%) | H-1->L+3 (7%)<br>H-4->LUMO (7%), H-3->L+1 (5%), H-3->L+4 (3%), H-3->L+8 (2%), H-2->L+2 (2%) |
| 18 | 425.433870954 | 0.0678 | H-2->L+1 (61%), HOMO->L+4 (10%)                                                                      |                                                                                             |
| 19 | 407.159676241 | 0.1097 | H-5->LUMO (51%), H-2->L+2 (42%)                                                                      |                                                                                             |
| 20 | 394.992491039 | 0.2802 | H-5->LUMO (39%), H-2->L+2 (50%)                                                                      | H-6->LUMO (2%), H-3->L+1 (2%), H-2->L+3 (3%)                                                |

#### AD 6

| No. | Wavelength (nm) | Osc. Strength | Major contribs                                                                      | Minor contribs                                                                               |
|-----|-----------------|---------------|-------------------------------------------------------------------------------------|----------------------------------------------------------------------------------------------|
| 1   | 727.222670023   | 0.0005        | H-1->LUMO (70%), H-1->L+1 (12%), H-1->L+3 (10%)                                     | HOMO->L+2 (5%)                                                                               |
| 2   | 669.714217103   | 0.0379        | HOMO->LUMO (60%), HOMO->L+1 (12%), HOMO->L+3 (15%)                                  | H-1->L+2 (8%)                                                                                |
| 3   | 554.739118623   | 0.0079        | H-4->LUMO (21%), H-3->LUMO (21%), H-1->L+2 (21%)                                    | H-4->L+1 (8%), H-4->L+3 (9%), H-3->L+1 (6%), H-3->L+3 (8%)                                   |
| 4   | 503.386898141   | 0.0001        | H-3->L+2 (15%), HOMO->L+2 (65%)                                                     | H-4->L+2 (7%), H-1->LUMO (6%)                                                                |
| 5   | 469.352638599   | 0.015         | H-3->LUMO (10%), H-1->L+2 (46%), HOMO->LUMO (24%)                                   | H-4->LUMO (5%), HOMO->L+1 (3%), HOMO->L+3 (7%)                                               |
| 6   | 441.256292306   | 0.0003        | H-4->L+2 (17%), H-3->L+2 (15%), H-1->LUMO (20%), H-1->L+1 (12%), H-1->L+3 (31%)     |                                                                                              |
| 7   | 424.865303996   | 0.0003        | H-2->LUMO (95%)                                                                     | H-2->L+1 (3%)                                                                                |
| 8   | 382.218980863   | 0.3503        | H-3->LUMO (27%), H-1->L+2 (12%), HOMO->LUMO (14%), HOMO->L+1 (19%), HOMO->L+3 (23%) |                                                                                              |
| 9   | 363.984948514   | 0.5669        | H-5->LUMO (10%), H-4->LUMO (44%), H-3->LUMO (32%)                                   | H-1->L+2 (3%), HOMO->L+1 (3%), HOMO->L+3 (6%)                                                |
| 10  | 355.683610684   | 0.0022        | H-4->L+2 (21%), H-3->L+2 (15%), H-1->L+1 (11%), H-1->L+3 (17%), HOMO->L+2 (22%)     | H-8->LUMO (3%), H-6->LUMO (7%)                                                               |
| 11  | 346.034588368   | 0.0036        | H-6->LUMO (89%)                                                                     |                                                                                              |
| 12  | 336.556890828   | 0.0128        | H-4->LUMO (19%), H-4->L+3 (17%), H-3->L+1 (10%), H-3->L+3 (20%)                     | H-7->LUMO (6%), H-4->L+1 (6%), H-3->LUMO (4%), H-1->L+2 (6%), HOMO->L+1 (3%), HOMO->L+3 (3%) |
| 13  | 327.195505798   | 0.0254        | H-5->LUMO (83%)                                                                     | H-4->LUMO (6%), H-3->LUMO (3%), H-3->L+3 (2%)                                                |

|    |               |        |                                     |                                                                                                                              |
|----|---------------|--------|-------------------------------------|------------------------------------------------------------------------------------------------------------------------------|
| 14 | 310.286283128 | 0.0011 | H-9->LUMO (81%)                     | H-8->LUMO (4%), H-7->LUMO (8%), H-2->L+1 (4%)<br>H-9->LUMO (3%), H-8->L+1 (3%)                                               |
| 15 | 304.989159235 | 0.0026 | H-8->LUMO (87%)                     |                                                                                                                              |
| 16 | 304.002042498 | 0.0485 | H-7->LUMO (80%)                     | H-9->LUMO (8%)                                                                                                               |
| 17 | 284.217483924 | 0.0052 | H-10->LUMO (92%)                    | H-9->L+4 (3%)                                                                                                                |
| 18 | 279.911936181 | 0.0148 | HOMO->L+1 (52%),<br>HOMO->L+3 (36%) | H-2->L+1 (5%)                                                                                                                |
| 19 | 279.508077488 | 0.0014 | H-1->L+1 (56%), H-1->L+3 (32%)      | H-2->L+1 (5%)<br>H-9->LUMO (4%), H-2->LUMO (3%), H-2->L+3 (6%), H-1->L+1 (4%), H-1->L+3 (2%), HOMO->L+1 (3%), HOMO->L+3 (2%) |
| 20 | 278.103703316 | 0.001  | H-2->L+1 (74%)                      |                                                                                                                              |

### AD 7

| No. | Wavelength (nm) | Osc. Strength | Major contribs                                                     | Minor contribs                                                                                                 |
|-----|-----------------|---------------|--------------------------------------------------------------------|----------------------------------------------------------------------------------------------------------------|
| 1   | 699.408771999   | 0.0004        | H-1->LUMO (68%), H-1->L+2 (23%)                                    | HOMO->L+1 (7%)                                                                                                 |
| 2   | 652.548384275   | 0.0253        | H-1->L+1 (10%), HOMO->LUMO (56%), HOMO->L+2 (29%)                  |                                                                                                                |
| 3   | 546.42658886    | 0.0051        | H-2->LUMO (31%), H-2->L+2 (23%), H-1->L+1 (25%)                    | H-3->LUMO (9%), H-3->L+2 (8%)                                                                                  |
| 4   | 502.285662827   | 0.0001        | H-2->L+1 (23%), HOMO->L+1 (64%)                                    | H-3->L+1 (3%), H-1->LUMO (6%)                                                                                  |
| 5   | 456.49555601    | 0.0115        | H-2->LUMO (18%), H-1->L+1 (45%), HOMO->LUMO (25%)                  | HOMO->L+2 (6%)                                                                                                 |
| 6   | 430.754935247   | 0.0005        | H-2->L+1 (25%), H-1->LUMO (23%), H-1->L+2 (37%)                    | H-3->L+1 (8%), HOMO->L+1 (3%)                                                                                  |
| 7   | 367.916534652   | 0.1126        | H-2->LUMO (14%), H-1->L+1 (11%), HOMO->LUMO (14%), HOMO->L+2 (53%) |                                                                                                                |
| 8   | 353.291710869   | 0.0001        | H-3->L+1 (10%), H-2->L+1 (27%), H-1->L+2 (32%), HOMO->L+1 (21%)    | H-7->LUMO (3%), HOMO->L+2 (2%)                                                                                 |
| 9   | 339.431634167   | 0.5129        | H-3->LUMO (64%), H-2->LUMO (25%)                                   |                                                                                                                |
| 10  | 332.254778144   | 0.0165        | H-4->LUMO (91%)                                                    | H-5->LUMO (3%)<br>H-6->LUMO (4%), H-5->LUMO (5%), H-3->L+2 (8%), H-2->LUMO (8%), H-1->L+1 (4%), HOMO->L+2 (4%) |
| 11  | 327.01427708    | 0.0383        | H-3->LUMO (20%), H-2->L+2 (43%)                                    | H-4->LUMO (4%), H-2->L+2 (3%)                                                                                  |
| 12  | 325.477628468   | 0.0016        | H-5->LUMO (88%)                                                    |                                                                                                                |

|    |               |        |                                                      |                                               |
|----|---------------|--------|------------------------------------------------------|-----------------------------------------------|
| 13 | 295.650975325 | 0.0022 | H-7->LUMO (92%)                                      | H-7->L+2 (4%)                                 |
| 14 | 293.808367526 | 0.0881 | H-6->LUMO (90%)                                      |                                               |
| 15 | 273.08692102  | 0.0081 | H-10->LUMO (86%)<br>H-8->LUMO (75%), HOMO->L+3 (19%) | H-9->LUMO (4%), H-8->LUMO (3%), H-5->L+3 (5%) |
| 16 | 258.284259343 | 0.0087 | H-8->LUMO (19%), HOMO->L+3 (78%)                     | H-10->LUMO (2%)                               |
| 17 | 251.117398198 | 0.0318 | H-1->L+3 (96%)                                       |                                               |
| 18 | 248.764432208 | 0.0012 | H-3->L+1 (73%), H-2->L+1 (20%)                       |                                               |
| 19 | 244.940916299 | 0.0    |                                                      | H-9->LUMO (3%), HOMO->L+6 (3%)                |
| 20 | 243.737109798 | 0.0047 | HOMO->L+4 (89%)                                      |                                               |

### AD 8

| No. | Wavelength (nm) | Osc. Strength | Major contribs                                                               | Minor contribs                                              |
|-----|-----------------|---------------|------------------------------------------------------------------------------|-------------------------------------------------------------|
| 1   | 646.121178864   | 0.0003        | H-1->LUMO (49%), H-1->L+1 (15%), H-1->L+3 (20%), HOMO->L+2 (11%)             |                                                             |
| 2   | 627.545644644   | 0.0344        | H-1->L+2 (15%), HOMO->LUMO (39%), HOMO->L+1 (13%), HOMO->L+3 (22%)           | H-2->LUMO (3%), H-2->L+3 (2%)                               |
| 3   | 528.446820443   | 0.0102        | H-4->LUMO (19%), H-4->L+1 (12%), H-4->L+3 (21%), H-1->L+2 (37%)              | HOMO->LUMO (3%)                                             |
| 4   | 506.016623183   | 0.0001        | H-4->L+2 (20%), H-2->L+2 (14%), H-1->LUMO (10%), HOMO->L+2 (52%)             |                                                             |
| 5   | 450.802432506   | 0.0536        | H-4->L+1 (4%), H-4->L+3 (6%), H-2->LUMO (6%), HOMO->L+1 (2%), HOMO->L+3 (7%) |                                                             |
| 6   | 437.735464667   | 0.0006        | H-4->LUMO (13%), H-1->L+2 (22%), HOMO->LUMO (39%)                            |                                                             |
| 7   | 413.777175985   | 0.0003        | H-4->L+2 (27%), H-1->LUMO (36%), H-1->L+3 (24%)                              | H-1->L+1 (6%)                                               |
| 8   | 393.750612971   | 0.5032        | H-3->LUMO (94%)                                                              | H-3->L+1 (5%)                                               |
| 9   | 371.532747033   | 0.1928        | H-2->LUMO (49%), H-1->L+2 (10%), HOMO->LUMO (17%), HOMO->L+3 (10%)           | H-4->LUMO (3%), HOMO->L+1 (9%)                              |
| 10  | 360.38773657    | 0.0           | H-4->LUMO (24%), H-2->LUMO (39%), HOMO->L+3 (15%)                            | H-1->L+2 (9%), HOMO->L+1 (9%)                               |
| 11  | 331.384489796   | 0.0005        | H-4->L+2 (38%), H-1->L+1 (13%), H-1->L+3 (20%), HOMO->L+2 (24%)              | H-1->LUMO (2%)                                              |
| 12  | 319.184926919   | 0.001         | H-4->LUMO (36%), H-4->L+1 (10%), H-4->L+3 (32%)                              | H-2->L+1 (3%), H-2->L+3 (6%), H-1->L+2 (4%), HOMO->L+1 (2%) |
|     |                 |               | H-5->LUMO (96%)                                                              |                                                             |

|    |               |        |                                                                                      |                                                                              |
|----|---------------|--------|--------------------------------------------------------------------------------------|------------------------------------------------------------------------------|
| 13 | 301.84830922  | 0.0647 | H-6->LUMO (47%), HOMO->L+1 (32%), HOMO->L+3 (16%)                                    |                                                                              |
| 14 | 297.195917859 | 0.0259 | H-7->LUMO (56%), H-6->LUMO (16%), HOMO->L+1 (12%)                                    | HOMO->L+3 (9%)                                                               |
| 15 | 293.398156591 | 0.0023 | H-1->L+1 (61%), H-1->L+3 (30%)                                                       | H-7->LUMO (3%)                                                               |
| 16 | 290.933435827 | 0.0589 | H-10->LUMO (30%), H-9->LUMO (10%), H-7->LUMO (18%), H-6->LUMO (14%), HOMO->L+1 (12%) | H-3->L+1 (3%), HOMO->L+3 (7%)                                                |
| 17 | 286.967232987 | 0.0403 | H-10->LUMO (44%), H-8->LUMO (14%), H-6->LUMO (12%)                                   | H-7->LUMO (9%), H-3->L+1 (7%), H-2->L+1 (3%), HOMO->L+1 (4%), HOMO->L+3 (3%) |
| 18 | 284.106766756 | 0.0138 | H-8->LUMO (76%)                                                                      | H-10->LUMO (7%), H-8->L+1 (3%), H-7->LUMO (3%)                               |
| 19 | 277.599339525 | 0.0021 | H-10->LUMO (10%), H-3->L+1 (79%)                                                     | H-3->LUMO (5%), H-3->L+3 (3%)                                                |
| 20 | 272.54065113  | 0.0207 | H-9->LUMO (33%), H-2->L+1 (54%)                                                      | H-10->LUMO (4%), HOMO->L+3 (2%)                                              |

#### AD 9

| No. | Wavelength (nm) | Osc. Strength | Major contribs                                                                   | Minor contribs                                                                      |
|-----|-----------------|---------------|----------------------------------------------------------------------------------|-------------------------------------------------------------------------------------|
| 1   | 712.675708526   | 0.0004        | H-1->LUMO (68%), H-1->L+1 (14%), H-1->L+3 (10%)                                  | HOMO->L+2 (6%)                                                                      |
| 2   | 663.194399637   | 0.038         | HOMO->LUMO (57%), HOMO->L+1 (14%), HOMO->L+3 (14%)                               | H-1->L+2 (9%)                                                                       |
| 3   | 550.209430249   | 0.008         | H-4->LUMO (28%), H-4->L+1 (12%), H-4->L+3 (11%), H-3->LUMO (10%), H-1->L+2 (23%) | H-5->LUMO (3%), H-3->L+1 (3%), H-3->L+3 (3%)                                        |
| 4   | 504.000784603   | 0.0001        | H-4->L+2 (13%), H-3->L+2 (11%), HOMO->L+2 (64%)                                  | H-1->LUMO (6%)                                                                      |
| 5   | 468.607578094   | 0.0002        | H-2->LUMO (89%)                                                                  | H-2->L+1 (3%), H-1->L+2 (4%)                                                        |
| 6   | 465.091878656   | 0.0179        | H-4->LUMO (9%), H-3->LUMO (8%), H-2->LUMO (7%), HOMO->L+1 (3%), HOMO->L+3 (6%)   | HOMO->L+1 (3%), HOMO->L+3 (6%)                                                      |
| 7   | 438.773376552   | 0.0004        | H-1->L+2 (40%), HOMO->LUMO (23%)                                                 | H-5->L+2 (2%), H-3->L+2 (7%)                                                        |
| 8   | 382.101186551   | 0.4823        | H-4->L+2 (23%), H-1->LUMO (22%), H-1->L+1 (13%), H-1->L+3 (27%)                  | HOMO->LUMO (14%), H-3->LUMO (34%), H-1->L+2 (10%), HOMO->L+1 (18%), HOMO->L+3 (19%) |
| 9   | 366.188767831   | 0.4337        | H-4->LUMO (28%), H-3->LUMO (42%)                                                 | H-5->LUMO (8%), H-1->L+2 (5%), HOMO->L+1 (7%), HOMO->L+3 (8%)                       |

|    |               |        |                                                                 |                                                                                            |
|----|---------------|--------|-----------------------------------------------------------------|--------------------------------------------------------------------------------------------|
| 10 | 355.469460169 | 0.0003 | H-4->L+2 (29%), H-1->L+1 (14%), H-1->L+3 (17%), HOMO->L+2 (23%) | H-10->LUMO (3%), H-6->LUMO (2%), H-5->L+2 (3%), H-3->L+2 (6%)                              |
| 11 | 340.410172457 | 0.0019 | H-6->LUMO (95%)                                                 |                                                                                            |
| 12 | 334.866152633 | 0.0057 | H-5->LUMO (10%), H-4->LUMO (27%), H-4->L+3 (19%)                | H-7->LUMO (4%), H-4->L+1 (9%), H-3->L+1 (7%), H-3->L+3 (7%), H-1->L+2 (5%), HOMO->L+3 (3%) |
| 13 | 329.894348541 | 0.0178 | H-5->LUMO (70%)                                                 | H-9->LUMO (5%), H-4->L+1 (4%), H-4->L+3 (6%), H-3->LUMO (4%), H-3->L+3 (4%)                |
| 14 | 319.217798693 | 0.0034 | H-9->LUMO (75%)                                                 | H-8->LUMO (7%), H-5->LUMO (6%), H-2->L+1 (5%)                                              |
| 15 | 303.503446702 | 0.0277 | H-8->LUMO (78%)                                                 | H-11->LUMO (5%), H-9->LUMO (4%), H-7->LUMO (9%)                                            |
| 16 | 301.386049424 | 0.0084 | H-10->LUMO (81%)                                                | H-10->L+1 (2%), H-7->LUMO (8%)                                                             |
| 17 | 301.012874826 | 0.0306 | H-7->LUMO (70%)                                                 | H-11->LUMO (4%), H-10->LUMO (6%), H-9->LUMO (4%), H-8->LUMO (5%)                           |
| 18 | 293.412043289 | 0.0005 | H-2->L+1 (80%)                                                  | H-9->LUMO (6%), H-2->LUMO (3%), H-2->L+3 (9%)                                              |
| 19 | 288.388986351 | 0.0143 | H-11->LUMO (84%)                                                | H-8->LUMO (7%)                                                                             |
| 20 | 275.367447001 | 0.0152 | HOMO->L+1 (50%), HOMO->L+3 (43%)                                |                                                                                            |

#### AD 9

| No. | Wavelength (nm) | Osc. Strength | Major contribs                                                                   | Minor contribs                                |
|-----|-----------------|---------------|----------------------------------------------------------------------------------|-----------------------------------------------|
| 1   | 685.905028835   | 0.0004        | H-1->LUMO (65%), H-1->L+2 (25%)                                                  | HOMO->L+1 (8%)                                |
| 2   | 646.424363984   | 0.0249        | H-1->L+1 (11%), HOMO->LUMO (54%), HOMO->L+2 (30%)                                |                                               |
| 3   | 542.268163979   | 0.0053        | H-3->LUMO (11%), H-3->L+2 (10%), H-2->LUMO (25%), H-2->L+2 (21%), H-1->L+1 (27%) |                                               |
| 4   | 502.794894409   | 0.0001        | H-2->L+1 (23%), HOMO->L+1 (63%)                                                  | H-3->L+1 (4%), H-1->LUMO (6%)                 |
| 5   | 451.936257973   | 0.0128        | H-2->LUMO (18%), H-1->L+1 (42%), HOMO->LUMO (27%)                                | H-3->LUMO (3%), H-2->L+2 (2%), HOMO->L+2 (5%) |
| 6   | 427.915348285   | 0.0006        | H-3->L+1 (10%), H-2->L+1 (22%), H-1->LUMO (25%), H-1->L+2 (35%)                  | HOMO->L+1 (3%)                                |
| 7   | 366.795435218   | 0.1266        | H-2->LUMO (13%), H-1->L+1 (11%), HOMO->LUMO (15%), HOMO->L+2 (53%)               | H-3->LUMO (2%)                                |



|    |               |        |                                                                 |                                                                                               |
|----|---------------|--------|-----------------------------------------------------------------|-----------------------------------------------------------------------------------------------|
| 8  | 353.331983506 | 0.0003 | H-3->L+1 (13%), H-2->L+1 (24%), H-1->L+2 (34%), HOMO->L+1 (21%) |                                                                                               |
| 9  | 338.50490898  | 0.5328 | H-3->LUMO (56%), H-2->LUMO (28%)                                | H-5->LUMO (7%)                                                                                |
| 10 | 332.183562888 | 0.0674 | H-5->LUMO (80%)                                                 | H-4->LUMO (9%), H-3->LUMO (7%)                                                                |
| 11 | 325.999666103 | 0.0007 | H-4->LUMO (79%)                                                 | H-5->LUMO (8%), H-2->L+2 (4%)                                                                 |
| 12 | 324.31125559  | 0.0164 | H-3->LUMO (16%), H-3->L+2 (11%), H-2->L+2 (39%)                 | H-6->LUMO (3%), H-5->LUMO (3%), H-4->LUMO (8%), H-2->LUMO (9%), H-1->L+1 (3%), HOMO->L+2 (3%) |
| 13 | 292.064245865 | 0.0038 | H-8->LUMO (72%), H-7->LUMO (18%)                                | H-8->L+2 (4%), H-6->LUMO (3%)                                                                 |
| 14 | 290.531207996 | 0.0694 | H-6->LUMO (88%)                                                 | H-8->LUMO (3%)                                                                                |
| 15 | 285.191592704 | 0.0148 | H-8->LUMO (18%), H-7->LUMO (79%)                                |                                                                                               |
| 16 | 276.140210277 | 0.0146 | H-10->LUMO (92%)                                                | H-5->L+4 (4%)                                                                                 |
| 17 | 252.559925469 | 0.0987 | H-9->LUMO (98%)                                                 |                                                                                               |
| 18 | 247.142928643 | 0.0042 | HOMO->L+3 (79%)                                                 | H-3->L+1 (8%), H-2->L+1 (3%), HOMO->L+5 (4%)                                                  |
| 19 | 246.59240043  | 0.0001 | H-3->L+1 (60%), H-2->L+1 (24%), HOMO->L+3 (10%)                 |                                                                                               |
| 20 | 244.945755403 | 0.0195 | HOMO->L+4 (94%)                                                 |                                                                                               |

#### AD 10

| No. | Wavelength (nm) | Osc. Strength | Major contribs                                                                   | Minor contribs                                |
|-----|-----------------|---------------|----------------------------------------------------------------------------------|-----------------------------------------------|
| 1   | 685.905028835   | 0.0004        | H-1->LUMO (65%), H-1->L+2 (25%)                                                  | HOMO->L+1 (8%)                                |
| 2   | 646.424363984   | 0.0249        | H-1->L+1 (11%), HOMO->LUMO (54%), HOMO->L+2 (30%)                                |                                               |
| 3   | 542.268163979   | 0.0053        | H-3->LUMO (11%), H-3->L+2 (10%), H-2->LUMO (25%), H-2->L+2 (21%), H-1->L+1 (27%) |                                               |
| 4   | 502.794894409   | 0.0001        | H-2->L+1 (23%), HOMO->L+1 (63%)                                                  | H-3->L+1 (4%), H-1->LUMO (6%)                 |
| 5   | 451.936257973   | 0.0128        | H-2->LUMO (18%), H-1->L+1 (42%), HOMO->LUMO (27%)                                | H-3->LUMO (3%), H-2->L+2 (2%), HOMO->L+2 (5%) |
| 6   | 427.915348285   | 0.0006        | H-3->L+1 (10%), H-2->L+1 (22%), H-1->LUMO (25%), H-1->L+2 (35%)                  | HOMO->L+1 (3%)                                |
| 7   | 366.795435218   | 0.1266        | H-2->LUMO (13%), H-1->L+1 (11%), HOMO->LUMO (15%), HOMO->L+2 (53%)               | H-3->LUMO (2%)                                |
| 8   | 353.331983506   | 0.0003        | H-3->L+1 (13%), H-2->L+1 (24%), H-1->L+2 (34%), HOMO->L+1 (21%)                  |                                               |

|    |               |        |                                                                    |                                                                                               |
|----|---------------|--------|--------------------------------------------------------------------|-----------------------------------------------------------------------------------------------|
| 9  | 338.50490898  | 0.5328 | (34%), HOMO->L+1 (21%)<br>H-3->LUMO (56%), H-2->LUMO (28%)         | H-5->LUMO (7%)<br>H-4->LUMO (9%), H-3->LUMO (7%)                                              |
| 10 | 332.183562888 | 0.0674 | H-5->LUMO (80%)                                                    | H-5->LUMO (8%), H-2->L+2 (4%)                                                                 |
| 11 | 325.999666103 | 0.0007 | H-4->LUMO (79%)                                                    | H-6->LUMO (3%), H-5->LUMO (3%), H-4->LUMO (8%), H-2->LUMO (9%), H-1->L+1 (3%), HOMO->L+2 (3%) |
| 12 | 324.31125559  | 0.0164 | H-3->LUMO (16%), H-3->L+2 (11%), H-2->L+2 (39%)                    | H-8->L+2 (4%), H-6->LUMO (3%)                                                                 |
| 13 | 292.064245865 | 0.0038 | H-8->LUMO (72%), H-7->LUMO (18%)                                   | H-8->LUMO (3%)                                                                                |
| 14 | 290.531207996 | 0.0694 | H-6->LUMO (88%)                                                    | H-8->LUMO (3%)                                                                                |
| 15 | 285.191592704 | 0.0148 | H-8->LUMO (18%), H-7->LUMO (79%)                                   |                                                                                               |
| 16 | 276.140210277 | 0.0146 | H-10->LUMO (92%)                                                   | H-5->L+4 (4%)                                                                                 |
| 17 | 252.559925469 | 0.0987 | H-9->LUMO (98%)                                                    |                                                                                               |
| 18 | 247.142928643 | 0.0042 | HOMO->L+3 (79%)<br>H-3->L+1 (60%), H-2->L+1 (24%), HOMO->L+3 (10%) | H-3->L+1 (8%), H-2->L+1 (3%), HOMO->L+5 (4%)                                                  |
| 19 | 246.59240043  | 0.0001 |                                                                    |                                                                                               |
| 20 | 244.945755403 | 0.0195 | HOMO->L+4 (94%)                                                    |                                                                                               |

#### AD 11

| No. | Wavelength (nm) | Osc. Strength | Major contribs                                                     | Minor contribs                                                               |
|-----|-----------------|---------------|--------------------------------------------------------------------|------------------------------------------------------------------------------|
| 1   | 647.403232271   | 0.0003        | H-1->LUMO (50%), H-1->L+1 (15%), H-1->L+3 (20%), HOMO->L+2 (11%)   |                                                                              |
| 2   | 628.2133817     | 0.0348        | H-1->L+2 (15%), HOMO->LUMO (39%), HOMO->L+1 (12%), HOMO->L+3 (22%) | H-2->LUMO (3%)                                                               |
| 3   | 528.762337991   | 0.0103        | H-4->LUMO (19%), H-4->L+1 (11%), H-4->L+3 (21%), H-1->L+2 (37%)    | HOMO->LUMO (3%)                                                              |
| 4   | 506.181893575   | 0.0001        | H-4->L+2 (20%), H-2->L+2 (13%), H-1->LUMO (10%), HOMO->L+2 (53%)   |                                                                              |
| 5   | 451.90331321    | 0.0527        | H-4->LUMO (12%), H-1->L+2 (22%), HOMO->LUMO (39%)                  | H-4->L+1 (4%), H-4->L+3 (5%), H-2->LUMO (6%), HOMO->L+1 (2%), HOMO->L+3 (7%) |
| 6   | 438.633669469   | 0.0005        | H-4->L+2 (27%), H-1->LUMO (36%), H-1->L+3 (24%)                    | H-1->L+1 (6%)                                                                |

|    |               |        |                                                                                       |                                                                                                                  |
|----|---------------|--------|---------------------------------------------------------------------------------------|------------------------------------------------------------------------------------------------------------------|
| 7  | 412.332279132 | 0.001  | H-3->LUMO (94%)<br>H-2->LUMO (48%), H-1->L+2 (10%), HOMO->LUMO (16%), HOMO->L+3 (10%) | H-3->L+1 (5%)<br>H-4->LUMO (3%), HOMO->L+1 (9%)                                                                  |
| 8  | 394.151173106 | 0.4965 | H-4->LUMO (25%), H-2->LUMO (39%), HOMO->L+3 (14%)                                     | H-1->L+2 (9%), HOMO->L+1 (9%)                                                                                    |
| 9  | 371.967457735 | 0.2011 | H-4->L+2 (38%), H-1->L+1 (12%), H-1->L+3 (19%), HOMO->L+2 (24%)                       |                                                                                                                  |
| 10 | 360.513486122 | 0.0    | H-4->LUMO (36%), H-4->L+3 (31%)                                                       | H-1->LUMO (2%)<br>H-4->L+1 (9%), H-2->L+1 (3%),<br>H-2->L+3 (6%), H-1->L+2 (4%),<br>HOMO->L+1 (2%)               |
| 11 | 332.094586737 | 0.0005 | H-5->LUMO (96%)<br>H-6->LUMO (39%),<br>HOMO->L+1 (37%),<br>HOMO->L+3 (17%)            |                                                                                                                  |
| 12 | 320.116167959 | 0.001  | H-7->LUMO (33%), H-6->LUMO (25%), HOMO->L+1 (12%)                                     | H-11->LUMO (2%), H-8->LUMO (9%), H-1->L+1 (3%),<br>HOMO->L+3 (8%)                                                |
| 13 | 303.555462277 | 0.0552 | H-11->LUMO (16%), H-8->LUMO (34%), H-7->LUMO (34%)                                    |                                                                                                                  |
| 14 | 298.347313358 | 0.0226 | H-8->LUMO (10%), H-1->L+1 (54%), H-1->L+3 (23%)                                       | H-1->L+1 (8%), H-1->L+3 (3%)                                                                                     |
| 15 | 296.039237392 | 0.0043 | H-10->LUMO (10%), H-7->LUMO (21%), H-6->LUMO (24%), HOMO->L+1 (10%)                   | H-11->LUMO (4%)<br>H-11->LUMO (9%), H-9->LUMO (5%), H-8->LUMO (5%), H-3->L+1 (2%), H-2->L+1 (4%), HOMO->L+3 (6%) |
| 16 | 295.763819209 | 0.0021 | H-9->LUMO (86%)                                                                       | H-9->L+1 (3%)<br>H-11->LUMO (3%), H-8->LUMO (8%), H-3->LUMO (5%), H-2->L+1 (6%)                                  |
| 17 | 290.211584224 | 0.0881 | H-3->L+1 (73%)<br>H-11->LUMO (10%), H-10->LUMO (26%), H-3->L+1 (12%), H-2->L+1 (40%)  |                                                                                                                  |
| 18 | 284.93598008  | 0.0101 |                                                                                       |                                                                                                                  |
| 19 | 279.899297933 | 0.005  |                                                                                       |                                                                                                                  |
| 20 | 274.198184338 | 0.0072 |                                                                                       | H-8->LUMO (6%)                                                                                                   |

#### ADA 0

| No. | Wavelength (nm) | Osc. Strength | Major contribs                                  | Minor contribs                               |
|-----|-----------------|---------------|-------------------------------------------------|----------------------------------------------|
| 1   | 716.298994813   | 0.016         | H-1->LUMO (71%), H-1->L+3 (18%)                 | HOMO->L+2 (7%)                               |
| 2   | 684.844194721   | 0.002         | HOMO->LUMO (61%), HOMO->L+3 (21%)               | H-1->L+1 (4%), H-1->L+2 (8%)                 |
| 3   | 563.052647649   | 0.0002        | H-3->LUMO (39%), H-3->L+3 (19%), H-1->L+2 (20%) | H-4->LUMO (9%), H-4->L+3 (4%), H-1->L+1 (4%) |

|    |               |        |                                                                                                                       |                                                                              |
|----|---------------|--------|-----------------------------------------------------------------------------------------------------------------------|------------------------------------------------------------------------------|
| 4  | 515.977331609 | 0.0038 | H-3->L+2 (22%), HOMO->L+1 (21%), HOMO->L+2 (46%)<br>H-3->LUMO (22%), H-1->L+1 (22%), H-1->L+2 (35%), HOMO->LUMO (16%) | H-3->L+1 (3%), H-1->LUMO (4%)                                                |
| 5  | 447.725671718 | 0.0003 |                                                                                                                       | H-3->L+3 (2%)<br>H-4->L+2 (5%), H-3->L+1 (5%), H-1->LUMO (5%), H-1->L+3 (4%) |
| 6  | 419.972200434 | 0.0344 | H-3->L+2 (26%), HOMO->L+1 (51%)<br>H-1->L+1 (62%), H-1->L+2 (21%), HOMO->L+3 (12%)                                    | HOMO->LUMO (4%)                                                              |
| 7  | 397.984762341 | 0.0009 | H-1->LUMO (12%), H-1->L+3 (14%), HOMO->L+1 (25%), HOMO->L+2 (28%)                                                     | H-4->L+2 (2%), H-3->L+1 (6%), H-3->L+2 (9%)                                  |
| 8  | 393.325908928 | 0.0717 | H-2->LUMO (95%)                                                                                                       |                                                                              |
| 9  | 352.628535302 | 0.791  | H-3->L+1 (21%), H-1->L+3 (53%), HOMO->L+2 (10%)                                                                       | H-6->LUMO (3%), H-3->L+2 (2%), H-1->LUMO (6%)                                |
| 10 | 343.598805599 | 0.0898 |                                                                                                                       |                                                                              |

#### ADA 1

| No. | Wavelength (nm) | Osc. Strength | Major contribs                                                                                                        | Minor contribs                                                                                                                 |
|-----|-----------------|---------------|-----------------------------------------------------------------------------------------------------------------------|--------------------------------------------------------------------------------------------------------------------------------|
| 1   | 745.142093949   | 0.0292        | H-1->LUMO (69%), H-1->L+4 (15%)<br>HOMO->LUMO (61%), HOMO->L+4 (17%)                                                  | H-1->L+7 (4%), HOMO->L+5 (5%)<br>H-1->L+1 (3%), H-1->L+5 (7%), HOMO->L+7 (6%)                                                  |
| 2   | 711.326408561   | 0.0026        | H-3->LUMO (36%), H-3->L+4 (14%), H-1->L+5 (17%)<br>H-3->L+5 (14%), HOMO->L+1 (32%), HOMO->L+5 (38%)                   | H-6->LUMO (8%), H-6->L+4 (4%), H-3->L+7 (5%), H-1->L+1 (4%)<br>H-3->L+1 (2%), H-1->LUMO (4%), HOMO->L+6 (2%)                   |
| 3   | 573.390339047   | 0.0005        | H-3->L+5 (14%), HOMO->L+1 (32%), HOMO->L+5 (38%)<br>H-3->LUMO (18%), H-1->L+1 (39%), H-1->L+5 (22%), HOMO->LUMO (13%) | H-6->L+5 (3%), H-3->L+1 (3%), HOMO->L+5 (9%), HOMO->L+6 (3%)<br>H-1->L+6 (6%), HOMO->LUMO (7%), HOMO->L+4 (6%), HOMO->L+7 (5%) |
| 4   | 529.078232535   | 0.0184        | H-1->L+1 (47%), H-1->L+5 (24%)<br>H-3->L+5 (14%), H-1->LUMO (19%), H-1->L+4 (13%), H-1->L+7 (10%), HOMO->L+5 (15%)    | H-6->L+5 (3%), H-3->L+1 (7%), HOMO->L+1 (6%), HOMO->L+6 (2%)                                                                   |
| 5   | 467.900192513   | 0.0009        | H-5->LUMO (28%), H-4->L+1 (11%), H-2->LUMO (46%)<br>H-5->L+1 (12%), H-4->LUMO (35%), HOMO->L+2 (30%)                  | H-5->L+1 (3%), H-4->LUMO (2%)<br>H-4->L+1 (5%), H-2->LUMO (2%), HOMO->L+3 (5%)                                                 |
| 6   | 449.169267877   | 0.1265        |                                                                                                                       |                                                                                                                                |
| 7   | 428.092649031   | 0.0004        |                                                                                                                       |                                                                                                                                |
| 8   | 415.427016292   | 0.1343        |                                                                                                                       |                                                                                                                                |
| 9   | 391.586738084   | 0.5402        |                                                                                                                       |                                                                                                                                |
| 10  | 389.973242576   | 0.012         |                                                                                                                       |                                                                                                                                |

| <b>ADA 2</b> |                 |               |                                                                   |                                                                                           |
|--------------|-----------------|---------------|-------------------------------------------------------------------|-------------------------------------------------------------------------------------------|
| No.          | Wavelength (nm) | Osc. Strength | Major contribs                                                    | Minor contribs                                                                            |
| 1            | 827.720094881   | 0.0           | H-1->LUMO (62%), H-1->L+2 (15%), H-1->L+4 (14%)                   | H-1->L+9 (3%), HOMO->L+5 (3%)                                                             |
| 2            | 731.383866283   | 0.0           | HOMO->LUMO (55%), HOMO->L+2 (12%), HOMO->L+4 (15%)                | H-1->L+5 (5%), HOMO->L+9 (6%)                                                             |
| 3            | 596.450632666   | 0.0           | H-4->LUMO (13%), H-3->LUMO (30%), H-3->L+4 (11%), H-1->L+5 (13%)  | H-7->LUMO (3%), H-4->L+2 (4%), H-4->L+4 (6%), H-4->L+9 (2%), H-3->L+2 (8%), H-3->L+9 (4%) |
| 4            | 528.739788529   | 0.292         | HOMO->L+1 (95%)                                                   | HOMO->L+3 (4%)                                                                            |
| 5            | 505.027262779   | 0.0           | H-3->L+5 (23%),                                                   |                                                                                           |
| 6            | 503.305159585   | 0.0024        | HOMO->L+5 (63%)                                                   | H-4->L+5 (3%), H-1->LUMO (5%)                                                             |
| 7            | 484.124142961   | 0.0           | H-1->L+1 (93%), H-1->L+5 (33%), HOMO->LUMO (32%), HOMO->L+2 (20%) | H-1->L+3 (7%)                                                                             |
| 8            | 451.557682967   | 0.0001        | H-1->LUMO (30%), H-1->L+2 (34%), H-1->L+4 (11%)                   | H-3->LUMO (4%), HOMO->L+4 (5%), HOMO->L+9 (3%)                                            |
| 9            | 448.97408297    | 0.7539        | H-2->LUMO (94%)                                                   | H-4->L+5 (4%), H-3->L+5 (9%), H-1->L+9 (6%)                                               |
| 10           | 448.454418245   | 0.0           | H-1->L+5 (31%), HOMO->L+2 (48%)                                   | H-3->LUMO (9%), H-2->L+1 (2%), H-1->L+2 (2%), HOMO->LUMO (3%)                             |

  

| <b>ADA 3</b> |                 |               |                                                                  |                                                                                                           |
|--------------|-----------------|---------------|------------------------------------------------------------------|-----------------------------------------------------------------------------------------------------------|
| No.          | Wavelength (nm) | Osc. Strength | Major contribs                                                   | Minor contribs                                                                                            |
| 1            | 752.605275053   | 0.0502        | H-1->LUMO (57%), H-1->L+2 (12%), H-1->L+4 (15%)                  | H-2->LUMO (3%), H-1->L+7 (2%), HOMO->L+5 (3%)                                                             |
| 2            | 714.853511371   | 0.003         | HOMO->LUMO (49%), HOMO->L+2 (11%), HOMO->L+4 (17%)               | H-1->L+3 (5%), H-1->L+5 (5%), HOMO->L+7 (3%)                                                              |
| 3            | 570.82961792    | 0.0087        | H-4->LUMO (21%), H-4->L+4 (15%), H-3->LUMO (10%), H-1->L+5 (10%) | H-4->L+2 (5%), H-4->L+7 (3%), H-3->L+2 (2%), H-3->L+4 (5%), H-1->L+3 (4%), HOMO->L+3 (5%), HOMO->L+5 (2%) |
| 4            | 561.726137243   | 0.0827        | HOMO->L+1 (10%), HOMO->L+3 (60%), HOMO->L+5 (11%)                | H-3->L+5 (2%), H-1->LUMO (3%)                                                                             |
| 5            | 523.117982415   | 0.0065        | HOMO->LUMO (21%), HOMO->L+2 (62%)                                | H-1->L+1 (3%), H-1->L+2 (2%), HOMO->L+1 (6%), HOMO->L+3 (3%)                                              |

|    |               |        |                                                                                       |                                                                                                                                |
|----|---------------|--------|---------------------------------------------------------------------------------------|--------------------------------------------------------------------------------------------------------------------------------|
| 6  | 522.324611418 | 0.0276 | HOMO->L+1 (70%),<br>HOMO->L+2 (10%)<br>H-1->L+1 (45%), H-1->L+2 (14%), H-1->L+3 (22%) | H-1->LUMO (3%), H-1->L+1 (6%), H-1->L+2 (2%), HOMO->L+3 (4%)<br>H-3->LUMO (2%), HOMO->L+1 (4%), HOMO->L+2 (3%), HOMO->L+3 (2%) |
| 7  | 511.844911911 | 0.0059 | H-1->LUMO (18%),<br>H-1->L+1 (11%), H-1->L+2 (56%)                                    | HOMO->L+1 (6%), HOMO->L+2 (2%)                                                                                                 |
| 8  | 508.090291829 | 0.0076 | H-1->L+1 (31%), H-1->L+3 (48%)                                                        | H-4->LUMO (2%), H-3->LUMO (4%), H-1->L+5 (2%), HOMO->LUMO (5%)                                                                 |
| 9  | 500.178283896 | 0.0021 |                                                                                       | H-4->L+3 (2%), H-4->L+5 (9%), H-3->L+3 (2%), H-3->L+5 (9%), HOMO->L+6 (8%)                                                     |
| 10 | 482.222367906 | 0.1944 | HOMO->L+3 (20%),<br>HOMO->L+5 (29%)                                                   |                                                                                                                                |

#### ADA 4

| No. | Wavelength (nm) | Osc. Strength | Major contribs                                                                                                              | Minor contribs                                                                 |
|-----|-----------------|---------------|-----------------------------------------------------------------------------------------------------------------------------|--------------------------------------------------------------------------------|
| 1   | 766.896721793   | 0.0688        | H-2->LUMO (15%), H-1->LUMO (58%)                                                                                            | H-2->L+5 (3%), H-1->L+2 (5%), H-1->L+5 (9%), HOMO->L+4 (4%)                    |
| 2   | 733.287159997   | 0.0095        | HOMO->LUMO (59%),<br>HOMO->L+5 (12%)                                                                                        | H-3->LUMO (4%), H-1->L+1 (4%), H-1->L+4 (4%), HOMO->L+2 (6%)                   |
| 3   | 577.826317809   | 0.0036        | H-4->LUMO (38%), H-4->L+5 (15%), H-1->L+4 (11%)                                                                             | H-6->LUMO (2%), H-4->L+2 (7%), H-3->LUMO (4%), H-2->L+4 (4%), H-1->L+1 (5%)    |
| 4   | 560.887550383   | 0.0941        | HOMO->L+1 (64%), HOMO->L+4 (15%)                                                                                            | H-4->L+4 (4%), H-3->L+1 (3%), H-3->L+4 (4%), H-1->LUMO (3%), HOMO->L+3 (3%)    |
| 5   | 502.346716147   | 0.007         | H-4->LUMO (10%), H-2->L+1 (12%), H-1->L+1 (55%)                                                                             | H-3->LUMO (9%), H-1->L+4 (3%), HOMO->LUMO (6%)                                 |
| 6   | 484.294336206   | 0.6827        | H-4->L+4 (11%), HOMO->L+1 (27%), HOMO->L+4 (26%)                                                                            | H-4->L+1 (3%), H-3->L+4 (8%), H-2->LUMO (9%), H-1->LUMO (7%)                   |
| 7   | 474.835100196   | 0.7398        | H-2->LUMO (55%), H-1->LUMO (20%)<br>H-2->L+4 (10%), H-1->L+1 (16%), H-1->L+4 (32%),<br>HOMO->LUMO (13%),<br>HOMO->L+5 (10%) | H-4->L+1 (2%), H-4->L+4 (7%), H-3->L+4 (2%),<br>HOMO->L+1 (3%), HOMO->L+4 (3%) |
| 8   | 458.504467336   | 0.0011        | H-4->L+1 (10%), H-4->L+4 (16%), H-2->LUMO (16%), H-1->L+5 (15%), HOMO->L+4 (11%)                                            | H-4->LUMO (5%), HOMO->L+2 (3%)                                                 |
| 9   | 436.02670305    | 0.0129        | H-3->LUMO (39%), H-2->L+1 (47%)                                                                                             | H-3->L+1 (4%), H-2->L+5 (4%), H-1->LUMO (7%), H-1->L+2 (4%)                    |
| 10  | 421.413932267   | 0.005         |                                                                                                                             | H-6->LUMO (2%), H-1->L+1 (2%), HOMO->LUMO (4%)                                 |

**ADA 5**

| No. | Wavelength (nm) | Osc. Strength | Major contribs                                                       | Minor contribs                                                                                                                                |
|-----|-----------------|---------------|----------------------------------------------------------------------|-----------------------------------------------------------------------------------------------------------------------------------------------|
| 1   | 804.517507055   | 0.0657        | H-1->LUMO (44%), H-1->L+2 (12%), H-1->L+6 (16%), H-1->L+15 (10%)     | HOMO->L+12 (3%)                                                                                                                               |
| 2   | 784.114552316   | 0.0028        | HOMO->LUMO (44%), HOMO->L+2 (10%), HOMO->L+6 (14%), HOMO->L+15 (12%) | H-1->L+1 (3%), H-1->L+12 (3%)                                                                                                                 |
| 3   | 676.695737432   | 0.048         | HOMO->L+1 (89%)                                                      | HOMO->LUMO (2%)                                                                                                                               |
| 4   | 656.24407459    | 0.0038        | H-1->L+1 (80%)                                                       | H-1->LUMO (5%), HOMO->LUMO (8%)                                                                                                               |
| 5   | 605.864899395   | 0.0336        | H-1->LUMO (31%), HOMO->LUMO (18%)                                    | H-2->LUMO (4%), H-1->L+2 (5%), H-1->L+6 (7%), H-1->L+15 (3%), HOMO->L+2 (5%), HOMO->L+6 (7%), HOMO->L+12 (3%), HOMO->L+15 (4%)                |
| 6   | 600.088054848   | 0.0064        | H-1->LUMO (16%), HOMO->LUMO (24%), HOMO->L+6 (10%)                   | H-1->L+1 (9%), H-1->L+2 (4%), H-1->L+6 (6%), H-1->L+15 (3%), HOMO->L+2 (8%), HOMO->L+12 (3%), HOMO->L+15 (5%)                                 |
| 7   | 583.427570525   | 0.0007        | H-4->LUMO (13%), H-4->L+6 (13%), H-4->L+15 (15%), H-1->L+12 (13%)    | H-4->L+2 (8%), H-3->LUMO (6%), H-3->L+2 (3%), H-3->L+6 (5%), H-3->L+15 (4%), H-1->L+1 (5%), H-1->L+9 (3%), H-1->L+14 (2%)                     |
| 8   | 540.424518404   | 0.2432        | H-2->LUMO (83%)                                                      | HOMO->L+12 (3%)                                                                                                                               |
| 9   | 537.915714401   | 0.0212        | H-2->L+1 (58%)                                                       | H-4->L+12 (2%), H-3->LUMO (3%), H-3->L+1 (2%), H-3->L+12 (2%), H-1->L+2 (3%), HOMO->L+3 (5%), HOMO->L+9 (5%), HOMO->L+12 (6%)                 |
| 10  | 532.029664488   | 0.0056        | H-2->L+1 (28%), HOMO->L+12 (14%)                                     | H-4->L+12 (5%), H-3->LUMO (4%), H-3->L+12 (5%), H-1->L+2 (4%), H-1->L+6 (3%), HOMO->L+1 (2%), HOMO->L+3 (7%), HOMO->L+9 (8%), HOMO->L+14 (2%) |
| 11  | 494.769116933   | 0.0001        | H-3->LUMO (27%), H-2->L+1 (11%), H-1->L+3 (25%), HOMO->L+2 (14%)     | H-1->L+9 (6%), H-1->L+12 (7%)                                                                                                                 |
| 12  | 484.521446763   | 0.0401        | HOMO->L+3 (70%)                                                      | H-4->L+12 (3%), H-3->L+1 (4%), H-3->L+12 (2%), H-1->L+2 (3%), HOMO->L+12 (5%)                                                                 |

|    |               |        |                                                                               |                                                                                                                                          |
|----|---------------|--------|-------------------------------------------------------------------------------|------------------------------------------------------------------------------------------------------------------------------------------|
| 13 | 479.833557848 | 0.0038 | H-3->L+1 (59%),<br>H-1->L+2 (14%)                                             | H-3->LUMO (4%), HOMO->L+2 (5%)                                                                                                           |
| 14 | 472.392718937 | 0.0039 | H-3->LUMO<br>(17%), H-1->L+3<br>(55%)                                         | H-1->L+2 (5%), H-1->L+4 (2%), H-1->L+12 (5%), HOMO->L+2 (5%)                                                                             |
| 15 | 471.781556363 | 0.0051 | H-3->LUMO<br>(22%), H-3->L+1<br>(10%), HOMO->L+2 (42%),<br>HOMO->L+6<br>(10%) | HOMO->L+4 (4%), HOMO->L+5 (3%)                                                                                                           |
| 16 | 465.913317847 | 0.0172 | H-3->L+1 (17%),<br>H-1->L+2 (41%),<br>H-1->L+6 (11%)                          | H-4->L+12 (3%), H-1->L+3 (6%), H-1->L+4 (3%), H-1->L+5 (4%), H-1->L+15 (3%)                                                              |
| 17 | 453.191728241 | 0.0036 | H-4->LUMO<br>(15%), HOMO->L+4 (13%),<br>HOMO->L+5<br>(10%)                    | H-3->LUMO (9%), H-3->L+2 (3%), H-2->L+3 (3%), H-1->L+3 (2%), H-1->L+4 (6%), H-1->L+5 (4%), H-1->L+9 (7%), H-1->L+12 (8%), HOMO->L+6 (8%) |
| 18 | 447.128252055 | 0.0306 | HOMO->L+4<br>(31%), HOMO->L+5 (47%)                                           | H-1->L+4 (2%), HOMO->L+9 (7%)                                                                                                            |
| 19 | 441.617784549 | 0.0253 | H-4->L+1 (20%),<br>H-1->L+4 (53%)                                             | H-4->L+12 (2%), H-1->L+5 (3%), HOMO->L+4 (2%), HOMO->L+5 (2%), HOMO->L+9 (4%)                                                            |
| 20 | 439.504406282 | 0.0001 | HOMO->L+4<br>(19%), HOMO->L+5 (19%),<br>HOMO->L+6<br>(14%)                    | H-4->LUMO (8%), H-2->L+3 (4%), H-1->L+4 (8%), H-1->L+5 (9%), H-1->L+9 (2%), H-1->L+12 (3%), HOMO->L+2 (4%)                               |

#### ADA 6

| No. | Wavelength (nm) | Osc. Strength | Major contribs                                          | Minor contribs                                                                                   |
|-----|-----------------|---------------|---------------------------------------------------------|--------------------------------------------------------------------------------------------------|
| 1   | 794.974307593   | 0.02          | H-1->LUMO (74%), H-1->L+2 (12%)                         | H-1->L+5 (6%), HOMO->L+3 (2%)                                                                    |
| 2   | 734.460002442   | 0.0027        | HOMO->LUMO (64%),<br>HOMO->L+2 (13%)                    | H-1->L+1 (3%), H-1->L+3 (4%),<br>HOMO->L+5 (8%)                                                  |
| 3   | 592.772007134   | 0.0004        | H-6->LUMO (43%), H-6->L+2 (13%)                         | H-8->LUMO (3%), H-6->L+5 (8%),<br>H-5->LUMO (7%), H-1->L+1 (2%),<br>H-1->L+3 (8%), H-1->L+4 (5%) |
| 4   | 526.472157164   | 0.0349        | HOMO->L+1 (37%),<br>HOMO->L+3 (28%),<br>HOMO->L+4 (11%) | H-6->L+3 (7%), H-6->L+4 (4%), H-5->L+3 (3%), H-1->LUMO (3%)                                      |
| 5   | 476.038368256   | 0.0012        | H-1->L+1 (46%), H-1->L+3 (18%), HOMO->LUMO (10%)        | H-6->LUMO (9%), H-5->LUMO (4%), H-1->L+4 (7%)                                                    |
| 6   | 454.587493628   | 0.1615        | H-6->L+3 (10%),<br>HOMO->L+1 (56%),<br>HOMO->L+4 (10%)  | H-6->L+1 (2%), H-6->L+4 (5%), H-5->L+3 (2%), HOMO->L+3 (8%)                                      |



|    |               |        |                                                                 |                                                                              |
|----|---------------|--------|-----------------------------------------------------------------|------------------------------------------------------------------------------|
| 7  | 444.738478414 | 0.002  | H-3->LUMO (36%), H-3->L+1 (17%), H-2->LUMO (37%)                | H-2->L+1 (6%)                                                                |
| 8  | 444.164910125 | 0.0001 | H-3->LUMO (37%), H-2->LUMO (36%), H-2->L+1 (18%)                | H-3->L+1 (6%)                                                                |
| 9  | 434.148725444 | 0.0004 | H-1->L+1 (41%), H-1->L+3 (18%), H-1->L+4 (18%)                  | HOMO->LUMO (6%), HOMO->L+2 (4%), HOMO->L+5 (6%)                              |
| 10 | 415.566257792 | 0.136  | H-6->L+3 (13%), H-1->LUMO (17%), H-1->L+2 (12%), H-1->L+5 (15%) | H-6->L+1 (8%), H-6->L+4 (6%), HOMO->L+1 (3%), HOMO->L+3 (8%), HOMO->L+4 (6%) |

#### ADA 7

| No. | Wavelength (nm) | Osc. Strength | Major contribs                                                    | Minor contribs                                 |
|-----|-----------------|---------------|-------------------------------------------------------------------|------------------------------------------------|
| 1   | 766.091158009   | 0.0148        | H-1->LUMO (74%), H-1->L+3 (17%)                                   | HOMO->L+2 (5%)                                 |
| 2   | 714.153522333   | 0.0022        | HOMO->LUMO (64%), HOMO->L+3 (21%)                                 | H-1->L+1 (3%), H-1->L+2 (7%)                   |
| 3   | 582.058086532   | 0.0002        | H-3->LUMO (48%), H-3->L+3 (21%), H-1->L+2 (15%)                   | H-4->LUMO (5%), H-4->L+3 (2%), H-1->L+1 (2%)   |
| 4   | 518.653808878   | 0.012         | H-3->L+2 (19%), HOMO->L+1 (26%), HOMO->L+2 (46%)                  | H-3->L+1 (2%), H-1->LUMO (3%)                  |
| 5   | 462.248128448   | 0.0005        | H-3->LUMO (16%), H-1->L+1 (32%), H-1->L+2 (35%), HOMO->LUMO (13%) |                                                |
| 6   | 436.318246805   | 0.0972        | H-3->L+2 (19%), HOMO->L+1 (63%)                                   | H-3->L+1 (3%), HOMO->L+2 (8%)                  |
| 7   | 418.3143595     | 0.0006        | H-1->L+1 (56%), H-1->L+2 (26%), HOMO->L+3 (10%)                   | HOMO->LUMO (4%)                                |
| 8   | 405.415581101   | 0.0519        | H-3->L+2 (18%), H-1->LUMO (15%), H-1->L+3 (22%), HOMO->L+2 (20%)  | H-3->L+1 (9%), HOMO->L+1 (8%)                  |
| 9   | 369.572531931   | 0.9676        | H-2->LUMO (97%)                                                   |                                                |
| 10  | 352.568370051   | 0.0471        | H-3->L+1 (42%), H-1->L+3 (37%)                                    | H-8->LUMO (4%), H-1->LUMO (4%), HOMO->L+2 (8%) |

#### ADA 8

| No. | Wavelength (nm) | Osc. Strength | Major contribs                                   | Minor contribs                                                              |
|-----|-----------------|---------------|--------------------------------------------------|-----------------------------------------------------------------------------|
| 1   | 682.206410324   | 0.0439        | H-2->LUMO (14%), H-1->LUMO (43%), H-1->L+2 (11%) | H-2->L+2 (5%), H-2->L+5 (4%), H-1->L+5 (9%), HOMO->L+3 (3%), HOMO->L+4 (6%) |
| 2   | 668.198291631   | 0.0026        | HOMO->LUMO (45%), HOMO->L+2 (14%),               | H-3->LUMO (4%), H-2->L+4 (2%), H-1->L+1 (3%), H-1->L+3 (3%), H-1->L+4 (5%)  |

|    |               |        |                                                                                                   |                                                                                                                                           |
|----|---------------|--------|---------------------------------------------------------------------------------------------------|-------------------------------------------------------------------------------------------------------------------------------------------|
| 3  | 547.802734999 | 0.0009 | HOMO->L+5<br>(13%)<br>H-6->LUMO<br>(27%), H-6->L+2<br>(14%), H-6->L+5<br>(14%), H-1->L+4<br>(13%) | H-3->LUMO (3%), H-2->L+3 (3%), H-2->L+4 (5%), H-1->L+1 (3%), H-1->L+3 (6%)                                                                |
| 4  | 522.390633742 | 0.0045 | H-6->L+4 (10%),<br>HOMO->L+1<br>(19%), HOMO->L+3 (14%),<br>HOMO->L+4<br>(23%)                     | H-6->L+3 (4%), H-3->L+3 (5%), H-3->L+4 (9%), H-1->LUMO (6%)                                                                               |
| 5  | 448.421979139 | 0.0131 | H-6->LUMO<br>(12%), H-3->LUMO (12%),<br>H-1->L+1 (20%),<br>HOMO->LUMO<br>(12%)                    | H-6->L+2 (4%), H-6->L+5 (3%), H-2->L+1 (5%), H-2->L+3 (2%), H-2->L+4 (3%), H-1->L+3 (5%), H-1->L+4 (9%),<br>HOMO->L+1 (8%)                |
| 6  | 444.499311699 | 0.129  | H-6->L+4 (10%),<br>HOMO->L+1<br>(59%)                                                             | H-6->L+1 (2%), H-6->L+3 (5%), H-3->L+4 (4%), H-1->L+1 (4%), HOMO->L+4 (5%)                                                                |
| 7  | 426.604937592 | 0.7574 | H-2->LUMO<br>(18%), H-1->LUMO (37%)                                                               | H-6->L+3 (2%), H-6->L+4 (5%), H-2->L+5 (2%), H-1->L+1 (8%), H-1->L+2 (3%), H-1->L+5 (4%), HOMO->LUMO (3%), HOMO->L+1 (4%), HOMO->L+4 (3%) |
| 8  | 425.185847093 | 0.1501 | H-1->L+1 (42%),<br>H-1->L+4 (11%)                                                                 | H-2->LUMO (3%), H-2->L+1 (4%), H-2->L+4 (4%), H-1->LUMO (8%), HOMO->LUMO (8%), HOMO->L+2 (3%),<br>HOMO->L+5 (5%)                          |
| 9  | 420.370899207 | 0.008  | H-5->LUMO<br>(41%), H-5->L+1<br>(25%), H-4->LUMO (18%)                                            | H-4->L+1 (7%)                                                                                                                             |
| 10 | 419.787347257 | 0.0028 | H-5->LUMO<br>(16%), H-4->LUMO (40%),<br>H-4->L+1 (29%)                                            | H-5->L+1 (8%)                                                                                                                             |

#### ADA 9

| No. | Wavelength (nm) | Osc. Strength | Major contribs                                  | Minor contribs                                                                    |
|-----|-----------------|---------------|-------------------------------------------------|-----------------------------------------------------------------------------------|
| 1   | 779.627699253   | 0.0227        | H-3->LUMO (63%), H-3->L+2 (12%)                 | H-3->L+5 (4%), H-2->LUMO (2%), H-1->LUMO (7%), HOMO->L+3 (3%)                     |
| 2   | 725.435568499   | 0.0026        | HOMO->LUMO (62%),<br>HOMO->L+2 (14%)            | H-3->L+1 (3%), H-3->L+3 (4%),<br>HOMO->L+5 (8%)                                   |
| 3   | 586.490979244   | 0.0005        | H-6->LUMO (44%), H-6->L+2 (14%), H-3->L+3 (10%) | H-8->LUMO (3%), H-6->L+5 (8%),<br>H-5->LUMO (4%), H-3->L+1 (2%),<br>H-3->L+4 (3%) |

|    |               |        |                                                                   |                                                                                              |
|----|---------------|--------|-------------------------------------------------------------------|----------------------------------------------------------------------------------------------|
| 4  | 524.423454074 | 0.0308 | H-6->L+3 (10%),<br>HOMO->L+1 (33%),<br>HOMO->L+3 (33%)            | H-6->L+4 (3%), H-5->L+3 (4%), H-3->LUMO (3%), HOMO->L+4 (7%)                                 |
| 5  | 489.93990758  | 0.0016 | H-2->LUMO (59%), H-2->L+1 (15%)                                   | H-3->LUMO (6%), H-3->L+1 (3%), H-1->LUMO (9%), H-1->L+1 (5%)                                 |
| 6  | 489.630333355 | 0.0015 | H-2->LUMO (12%), H-1->LUMO (58%), H-1->L+1 (18%)                  | H-3->LUMO (3%), H-2->L+1 (6%)                                                                |
| 7  | 471.351098739 | 0.0018 | H-6->LUMO (11%), H-3->L+1 (36%), H-3->L+3 (20%), HOMO->LUMO (11%) | H-5->LUMO (4%), H-3->L+4 (4%), H-2->L+1 (2%), H-1->L+1 (3%), H-1->L+3 (2%)                   |
| 8  | 452.002161911 | 0.1907 | H-6->L+3 (12%), HOMO->L+1 (59%)                                   | H-6->L+1 (2%), H-6->L+4 (3%), H-5->L+3 (2%), HOMO->L+3 (9%), HOMO->L+4 (6%)                  |
| 9  | 431.714868248 | 0.0005 | H-3->L+1 (40%), H-3->L+3 (18%), H-3->L+4 (10%)                    | H-1->L+1 (4%), HOMO->LUMO (6%), HOMO->L+2 (5%), HOMO->L+5 (6%)                               |
| 10 | 415.413097273 | 0.3607 | H-6->L+3 (15%), H-3->LUMO (17%), H-3->L+2 (10%), H-3->L+5 (11%)   | H-6->L+1 (7%), H-6->L+4 (3%), H-4->LUMO (9%), HOMO->L+1 (3%), HOMO->L+3 (9%), HOMO->L+4 (3%) |

#### ADA 10

| No. | Wavelength (nm) | Osc. Strength | Major contribs                                                                    | Minor contribs                                  |
|-----|-----------------|---------------|-----------------------------------------------------------------------------------|-------------------------------------------------|
| 1   | 750.010241439   | 0.0169        | H-1->LUMO (72%), H-1->L+3 (18%)                                                   | HOMO->L+2 (5%)                                  |
| 2   | 705.417575172   | 0.0022        | HOMO->LUMO (63%), HOMO->L+3 (22%)                                                 | H-1->L+1 (3%), H-1->L+2 (7%)                    |
| 3   | 575.626505466   | 0.0003        | H-3->LUMO (44%), H-3->L+3 (21%), H-1->L+2 (17%)                                   | H-4->LUMO (6%), H-4->L+3 (3%), H-1->L+1 (3%)    |
| 4   | 518.111964113   | 0.0099        | H-3->L+2 (20%), HOMO->L+1 (23%), HOMO->L+2 (46%)                                  | H-3->L+1 (2%), H-1->LUMO (4%)                   |
| 5   | 458.40275451    | 0.0006        | H-3->LUMO (18%), H-1->L+1 (28%), H-1->L+2 (35%), HOMO->LUMO (14%)                 | H-4->L+2 (2%), H-3->L+1 (3%), HOMO->L+2 (6%)    |
| 6   | 432.981292168   | 0.1007        | H-3->L+2 (19%), HOMO->L+1 (63%)                                                   | H-4->L+2 (2%), H-3->L+1 (3%), HOMO->L+2 (6%)    |
| 7   | 414.648985025   | 0.0005        | H-1->L+1 (59%), H-1->L+2 (24%), HOMO->L+3 (10%)                                   | HOMO->LUMO (4%)                                 |
| 8   | 404.081064473   | 0.0749        | H-3->L+2 (17%), H-1->LUMO (16%), H-1->L+3 (21%), HOMO->L+1 (10%), HOMO->L+2 (21%) | H-4->L+2 (2%), H-3->L+1 (7%)                    |
| 9   | 370.301036414   | 1.0402        | H-2->LUMO (97%)                                                                   | H-10->LUMO (3%), H-1->LUMO (4%), HOMO->L+2 (9%) |
| 10  | 350.812611092   | 0.0402        | H-3->L+1 (36%), H-1->L+3 (40%)                                                    |                                                 |

**ADA 11**

| No. | Wavelength (nm) | Osc. Strength | Major contribs                                                    | Minor contribs                                                                                                                                          |
|-----|-----------------|---------------|-------------------------------------------------------------------|---------------------------------------------------------------------------------------------------------------------------------------------------------|
| 1   | 684.01298142    | 0.0447        | H-2->LUMO (14%), H-1->LUMO (44%), H-1->L+2 (11%)                  | H-2->L+2 (5%), H-2->L+5 (4%), H-1->L+5 (9%), HOMO->L+3 (3%), HOMO->L+4 (7%)                                                                             |
| 2   | 669.858949766   | 0.0027        | HOMO->LUMO (46%), HOMO->L+2 (14%), HOMO->L+5 (14%)                | H-2->L+4 (2%), H-1->L+1 (3%), H-1->L+3 (3%), H-1->L+4 (5%)                                                                                              |
| 3   | 548.602623948   | 0.001         | H-6->LUMO (27%), H-6->L+2 (14%), H-6->L+5 (14%), H-1->L+4 (14%)   | H-4->LUMO (2%), H-2->L+3 (2%), H-2->L+4 (5%), H-1->L+1 (3%), H-1->L+3 (6%)                                                                              |
| 4   | 523.405070129   | 0.0052        | H-6->L+4 (10%), HOMO->L+1 (20%), HOMO->L+3 (13%), HOMO->L+4 (24%) | H-6->L+3 (4%), H-4->L+3 (3%), H-4->L+4 (6%), H-3->L+4 (4%), H-1->LUMO (6%)                                                                              |
| 5   | 449.543847035   | 0.0137        | H-6->LUMO (12%), H-1->L+1 (21%), HOMO->LUMO (12%)                 | H-6->L+2 (3%), H-6->L+5 (3%), H-4->LUMO (8%), H-3->LUMO (5%), H-2->L+1 (5%), H-2->L+3 (2%), H-2->L+4 (3%), H-1->L+3 (5%), H-1->L+4 (9%), HOMO->L+1 (7%) |
| 6   | 445.5215531     | 0.1359        | H-6->L+4 (10%), HOMO->L+1 (59%)                                   | H-6->L+1 (2%), H-6->L+3 (5%), H-4->L+4 (3%), H-1->L+1 (4%), HOMO->L+4 (6%)                                                                              |
| 7   | 427.148739104   | 0.7308        | H-2->LUMO (18%), H-1->LUMO (35%)                                  | H-6->L+3 (2%), H-6->L+4 (5%), H-2->L+5 (2%), H-1->L+1 (8%), H-1->L+2 (3%), H-1->L+5 (4%), HOMO->LUMO (3%), HOMO->L+1 (3%), HOMO->L+4 (3%)               |
| 8   | 425.88689548    | 0.1416        | H-1->L+1 (41%), H-1->L+4 (12%)                                    | H-2->LUMO (3%), H-2->L+1 (3%), H-2->L+4 (4%), H-1->LUMO (7%), HOMO->LUMO (9%), HOMO->L+2 (3%), HOMO->L+5 (5%)                                           |
| 9   | 421.91585453    | 0.0433        | H-4->LUMO (25%), H-4->L+1 (14%), H-3->LUMO (33%), H-3->L+1 (18%)  | H-1->LUMO (2%)                                                                                                                                          |
| 10  | 418.554429182   | 0.0009        | H-5->LUMO (58%), H-5->L+1 (37%)                                   | H-5->L+2 (3%)                                                                                                                                           |

## Cartesian coordinates of the optimized structures

### AD 0

|    |             |             |             |
|----|-------------|-------------|-------------|
| H  | 1.82875800  | -0.90121900 | -3.32031100 |
| C  | 1.57287800  | -0.04668500 | -2.71244600 |
| H  | 3.46612900  | 1.14713200  | -2.71766800 |
| C  | 2.44316100  | 1.03924200  | -2.39088200 |
| H  | -0.51824800 | -0.50316300 | -2.10650400 |
| C  | 0.33028300  | 0.15930100  | -2.06356400 |
| C  | 1.74912500  | 1.92489000  | -1.53415400 |
| C  | 0.41203200  | 1.40421000  | -1.33396900 |
| H  | 2.13077700  | 2.84048400  | -1.10767700 |
| Fe | 1.83423500  | 0.06646700  | -0.64079300 |
| H  | 4.54596900  | -0.54078300 | -0.12997300 |
| C  | 2.66012100  | -1.74237700 | -0.05178500 |
| C  | 3.54902800  | -0.67244200 | 0.26293500  |
| C  | 1.43507000  | -1.51880800 | 0.64533000  |
| C  | 2.87484100  | 0.21486500  | 1.15379000  |
| H  | 3.27327100  | 1.13225900  | 1.55990400  |
| C  | 1.57066400  | -0.31145400 | 1.39079700  |
| H  | 0.80441200  | 0.14540800  | 1.99935600  |
| C  | -0.53411600 | 2.03977000  | -0.46886000 |
| H  | -0.14802600 | 2.88721000  | 0.08912100  |
| C  | -1.85781600 | 1.75310000  | -0.25884900 |
| H  | 0.55393800  | -2.14060300 | 0.59820900  |
| C  | -2.56892200 | 0.70882900  | -0.91759400 |
| N  | -3.16617900 | -0.13117500 | -1.44274000 |
| C  | -2.61402600 | 2.52933700  | 0.66934800  |
| N  | -3.23120800 | 3.15659600  | 1.42053700  |
| H  | 2.86743200  | -2.56170900 | -0.72351500 |

### AD 1

|    |             |             |             |
|----|-------------|-------------|-------------|
| H  | 2.44166000  | -1.30727800 | -3.01944100 |
| C  | 1.98861600  | -0.41895100 | -2.60537500 |
| H  | 3.62770700  | 1.09697200  | -2.78483900 |
| C  | 2.62058100  | 0.85684300  | -2.47922500 |
| H  | -0.04506900 | -1.12466600 | -1.99058800 |
| C  | 0.68476500  | -0.33600200 | -2.05719400 |
| C  | 1.71233100  | 1.73701300  | -1.84521500 |
| C  | 0.48150200  | 1.01497800  | -1.59004100 |
| H  | 1.88836400  | 2.77317100  | -1.59663200 |
| Fe | 2.07944100  | 0.13790300  | -0.59310500 |
| H  | 4.81381800  | 0.16686300  | 0.12264700  |
| C  | 3.17155000  | -1.33070600 | 0.38257300  |
| C  | 3.83053100  | -0.07118700 | 0.49974100  |
| C  | 1.87948900  | -1.21067900 | 0.97688800  |
| C  | 2.94693000  | 0.82959500  | 1.16623200  |
| H  | 3.14518600  | 1.86729400  | 1.38824500  |
| C  | 1.74388900  | 0.12319200  | 1.46199800  |
| H  | 0.86632100  | 0.53807500  | 1.93525300  |
| C  | -0.62149200 | 1.62049200  | -0.90124000 |
| H  | -0.41522600 | 2.63251800  | -0.55324900 |

|   |             |             |             |
|---|-------------|-------------|-------------|
| H | 1.12924100  | -1.98505800 | 1.02918900  |
| C | -1.88625100 | 1.20078900  | -0.61085800 |
| C | -2.81628400 | 2.09961600  | 0.12586700  |
| C | -2.61331500 | -0.05569200 | -0.90444800 |
| C | -4.10886500 | 1.36979000  | 0.26032200  |
| C | -3.98985100 | 0.11315600  | -0.34344200 |
| C | -5.29690000 | 1.77093200  | 0.86088100  |
| C | -5.05682500 | -0.77774600 | -0.36324900 |
| C | -6.37091600 | 0.87923200  | 0.84353100  |
| H | -5.38401000 | 2.74530800  | 1.32674300  |
| C | -6.25212600 | -0.37988200 | 0.23863400  |
| H | -4.96079300 | -1.74993100 | -0.83192100 |
| H | -7.31113100 | 1.16101500  | 1.30312700  |
| H | -7.10263500 | -1.05170400 | 0.24016700  |
| O | -2.21766600 | -1.05759400 | -1.48390100 |
| O | -2.57770400 | 3.22304400  | 0.54409000  |
| H | 3.56936800  | -2.21165000 | -0.09837900 |

## AD 2

|    |             |             |             |
|----|-------------|-------------|-------------|
| H  | -0.11376000 | -3.65258200 | -0.40198300 |
| C  | -0.26870500 | -2.61344800 | -0.65075200 |
| H  | 0.40154200  | -2.51445700 | -2.78536400 |
| C  | 0.00847700  | -2.00982200 | -1.91586200 |
| H  | -1.02197200 | -1.74978300 | 1.26551100  |
| C  | -0.73642200 | -1.61520300 | 0.23787100  |
| C  | -0.27495200 | -0.62900300 | -1.81587700 |
| C  | -0.77384200 | -0.35992000 | -0.47747000 |
| H  | -0.16180700 | 0.10838200  | -2.59673900 |
| Fe | 1.16516300  | -1.10887900 | -0.42359300 |
| H  | 3.01988500  | 0.65843700  | -1.64501800 |
| C  | 3.14828800  | -1.45797400 | -0.92237300 |
| C  | 2.90918700  | -0.05356700 | -0.84132100 |
| C  | 2.85431100  | -2.03065100 | 0.35029500  |
| C  | 2.47111500  | 0.23868400  | 0.48370400  |
| H  | 2.17779900  | 1.21040900  | 0.85202700  |
| C  | 2.43340900  | -0.98105200 | 1.22084500  |
| H  | 2.12105000  | -1.09350100 | 2.24797400  |
| C  | -1.05277000 | 0.98300100  | -0.06200700 |
| H  | -0.73959200 | 1.69905700  | -0.81277300 |
| H  | 2.91071800  | -3.07915000 | 0.60138700  |
| C  | -1.67221300 | 1.51559700  | 1.04189000  |
| C  | -1.87552500 | 2.94825900  | 1.27894800  |
| C  | -2.41538200 | 0.78231600  | 2.10558700  |
| C  | -2.87600400 | 3.08453800  | 2.36254200  |
| C  | -3.17363100 | 1.80617000  | 2.86332500  |
| C  | -3.50526900 | 4.20056300  | 2.92158600  |
| C  | -4.06402100 | 1.60799200  | 3.90835000  |
| C  | -4.40903800 | 4.00405500  | 3.96736900  |
| C  | -4.68619900 | 2.72597200  | 4.46331500  |
| H  | -4.26591400 | 0.60823000  | 4.27389400  |
| H  | -5.38922300 | 2.60757900  | 5.27923800  |

|   |             |             |             |
|---|-------------|-------------|-------------|
| H | -4.90516800 | 4.86376900  | 4.40198400  |
| H | -3.32237200 | 5.20278700  | 2.56561500  |
| C | -1.21112000 | 4.00227000  | 0.68110800  |
| C | -1.48473900 | 5.37123400  | 0.96603700  |
| N | -1.66193600 | 6.49978100  | 1.15187100  |
| C | -0.13985800 | 3.85625900  | -0.24775300 |
| N | 0.74756500  | 3.80956300  | -0.98968800 |
| O | -2.44088300 | -0.41779800 | 2.32533500  |
| H | 3.46556600  | -1.99803100 | -1.80176200 |

### AD 3

|    |             |             |             |
|----|-------------|-------------|-------------|
| H  | 0.98585200  | -2.80815500 | -1.57806900 |
| C  | 0.70420200  | -1.77062000 | -1.67455300 |
| H  | 1.91183100  | -1.09186800 | -3.43197100 |
| C  | 1.19950300  | -0.85904700 | -2.65523700 |
| H  | -0.68201800 | -1.49209500 | 0.04096600  |
| C  | -0.18076400 | -1.07217700 | -0.81581000 |
| C  | 0.63733100  | 0.41449900  | -2.40190700 |
| C  | -0.26089400 | 0.29606700  | -1.27033700 |
| H  | 0.81887300  | 1.32028100  | -2.96069600 |
| Fe | 1.68592400  | -0.18566100 | -0.73550100 |
| H  | 4.41139200  | -0.36455400 | -1.45971800 |
| C  | 3.25172000  | -1.03020400 | 0.33394300  |
| C  | 3.75830700  | -0.11651600 | -0.63659300 |
| C  | 2.39695000  | -0.30650700 | 1.21840500  |
| C  | 3.21614900  | 1.17281700  | -0.35563300 |
| H  | 3.39271500  | 2.07436700  | -0.92242100 |
| C  | 2.37930500  | 1.05353200  | 0.79326100  |
| H  | 1.80178300  | 1.84877800  | 1.24055400  |
| C  | -0.88684500 | 1.44103700  | -0.67331400 |
| H  | -0.41794100 | 2.37155000  | -0.97000600 |
| H  | 1.84503400  | -0.71979000 | 2.04897200  |
| C  | -1.88567600 | 1.53649400  | 0.26231200  |
| C  | -2.07774400 | 2.71728700  | 1.12280800  |
| C  | -2.74682900 | 0.48221800  | 0.81236800  |
| C  | -2.66808700 | 2.22045900  | 2.37518200  |
| C  | -3.05396500 | 0.86841500  | 2.19419800  |
| C  | -2.87080600 | 2.84779100  | 3.60462000  |
| C  | -3.63454900 | 0.15007600  | 3.23779400  |
| C  | -3.44156500 | 2.11708700  | 4.64627400  |
| C  | -3.81653900 | 0.78399400  | 4.46654700  |
| H  | -3.92351800 | -0.88413300 | 3.12047700  |
| H  | -4.25001600 | 0.23166900  | 5.29145400  |
| H  | -3.58949500 | 2.59165900  | 5.60871100  |
| H  | -2.58385800 | 3.87509000  | 3.77147400  |
| C  | -1.80898200 | 4.03260300  | 0.81134700  |
| C  | -2.01343900 | 5.11248700  | 1.71758500  |
| N  | -2.16178700 | 6.02392800  | 2.41471600  |
| C  | -1.36004900 | 4.46089700  | -0.47155200 |
| N  | -1.00604300 | 4.85530600  | -1.50012900 |
| C  | -3.33745300 | -0.53452800 | 0.09708200  |

|   |             |             |             |
|---|-------------|-------------|-------------|
| C | -3.23927700 | -0.64017100 | -1.32077200 |
| N | -3.23133300 | -0.73737900 | -2.47308200 |
| C | -4.20828300 | -1.49768300 | 0.68405900  |
| N | -4.91495700 | -2.30223700 | 1.12167700  |
| H | 3.45612100  | -2.08948800 | 0.37429200  |

**AD 4**

|    |             |             |             |
|----|-------------|-------------|-------------|
| H  | 0.82778100  | -1.18342600 | -3.34483500 |
| C  | 0.81946100  | -0.25875700 | -2.78782200 |
| H  | 2.82248100  | 0.62157700  | -3.26133900 |
| C  | 1.87932900  | 0.69804700  | -2.74202800 |
| H  | -1.15371800 | -0.33355700 | -1.75788500 |
| C  | -0.22696600 | 0.18772900  | -1.94156200 |
| C  | 1.49631500  | 1.74196100  | -1.86430300 |
| C  | 0.16923800  | 1.45242200  | -1.37030200 |
| H  | 2.08037800  | 2.61395100  | -1.60998300 |
| Fe | 1.50367300  | -0.04544300 | -0.82643700 |
| H  | 4.15374000  | -1.02853700 | -0.77082400 |
| C  | 2.17270100  | -1.91533300 | -0.22700200 |
| C  | 3.24564000  | -0.97657400 | -0.18919000 |
| C  | 1.15292700  | -1.45699800 | 0.66017200  |
| C  | 2.89053600  | 0.06398400  | 0.72006100  |
| H  | 3.48503600  | 0.93431800  | 0.95349800  |
| C  | 1.59916100  | -0.23647000 | 1.24583000  |
| H  | 1.03937400  | 0.37449200  | 1.93828700  |
| C  | -0.54023400 | 2.27298300  | -0.42991900 |
| H  | 0.02432600  | 3.11545200  | -0.04661600 |
| H  | 0.20296000  | -1.93749600 | 0.83906400  |
| C  | -1.83025900 | 2.08139800  | -0.02563900 |
| H  | -2.38116300 | 1.24183800  | -0.43693400 |
| C  | -2.54666700 | 2.88452400  | 0.89897400  |
| C  | -3.85580800 | 2.65667100  | 1.29070300  |
| C  | -2.05520500 | 4.12391600  | 1.62959800  |
| C  | -4.65278000 | 1.58556400  | 0.82402200  |
| N  | -5.25555700 | 0.69044900  | 0.40745000  |
| C  | -4.24714900 | 3.67347400  | 2.23066400  |
| O  | -3.23473400 | 4.51239300  | 2.43213800  |
| C  | -5.43783100 | 3.88822400  | 2.90641600  |
| C  | -0.93452000 | 3.84626200  | 2.63381100  |
| H  | -1.20342200 | 3.02183700  | 3.29587600  |
| H  | -0.00834000 | 3.59122900  | 2.11882600  |
| H  | -0.76148600 | 4.74153500  | 3.23328400  |
| C  | -1.76293900 | 5.30953800  | 0.70748000  |
| H  | -0.87189100 | 5.12291900  | 0.10804900  |
| H  | -2.60268100 | 5.49368200  | 0.03570300  |
| H  | -1.59084800 | 6.20012400  | 1.31412200  |
| C  | -5.55059100 | 4.99017100  | 3.79353400  |
| N  | -5.65445700 | 5.88574400  | 4.52034000  |
| C  | -6.57300200 | 3.05372100  | 2.76210500  |
| N  | -7.52618000 | 2.40132600  | 2.67814300  |
| H  | 2.12778700  | -2.80202500 | -0.84127400 |



**AD 5**

|    |             |             |             |
|----|-------------|-------------|-------------|
| H  | 0.85871900  | -1.99622300 | -2.94610900 |
| C  | 0.70822400  | -0.99259800 | -2.57811100 |
| H  | 2.12724600  | 0.21617600  | -3.81639200 |
| C  | 1.37480300  | 0.17989900  | -3.04347500 |
| H  | -0.83385300 | -1.30627500 | -1.02112300 |
| C  | -0.16664800 | -0.62770600 | -1.52434800 |
| C  | 0.90306200  | 1.27921300  | -2.28974700 |
| C  | -0.07415000 | 0.80421500  | -1.33420400 |
| H  | 1.21396500  | 2.30833900  | -2.39450700 |
| Fe | 1.77399900  | -0.10801700 | -1.01309300 |
| H  | 4.51299900  | -0.12030100 | -1.69783000 |
| C  | 3.23912900  | -1.46064400 | -0.43844000 |
| C  | 3.83798800  | -0.23843200 | -0.86355300 |
| C  | 2.38684600  | -1.17353400 | 0.66963500  |
| C  | 3.35452600  | 0.80691700  | -0.02177300 |
| H  | 3.60437900  | 1.85410000  | -0.10140100 |
| C  | 2.46024400  | 0.22704000  | 0.92602000  |
| H  | 1.90734700  | 0.76278800  | 1.68339600  |
| C  | -0.78918600 | 1.72058900  | -0.48388600 |
| H  | -0.66426900 | 2.74580100  | -0.82234100 |
| H  | 1.78201100  | -1.88998400 | 1.20495500  |
| C  | -1.62525300 | 1.59478100  | 0.59181800  |
| C  | -2.39742800 | 2.72804200  | 1.10846100  |
| C  | -1.99950600 | 0.46622600  | 1.43898300  |
| C  | -2.40831000 | 4.04972200  | 0.66506900  |
| C  | -3.21544900 | 2.30728100  | 2.19476500  |
| C  | -1.44569600 | -0.81009200 | 1.52500300  |
| C  | -3.03849100 | 0.86575400  | 2.33523300  |
| C  | -3.20910800 | 4.95937000  | 1.33380900  |
| H  | -1.81393000 | 4.38294400  | -0.17352600 |
| C  | -3.92919500 | 3.30243700  | 2.89042000  |
| C  | -1.99591300 | -1.71401700 | 2.41940100  |
| H  | -0.58928200 | -1.09784800 | 0.93787900  |
| C  | -3.63760500 | -0.13732000 | 3.12075100  |
| C  | -3.95790800 | 4.61526400  | 2.45815200  |
| C  | -3.11739800 | -1.41665800 | 3.18951100  |
| H  | -4.51533000 | 5.36278000  | 3.00184700  |
| H  | -3.58361100 | -2.16860700 | 3.80787600  |
| N  | -1.40263800 | -3.05722600 | 2.53023800  |
| O  | -1.93116500 | -3.85615200 | 3.29383300  |
| O  | -0.40777300 | -3.30150900 | 1.85544300  |
| N  | -4.93522700 | 0.05451900  | 3.79151700  |
| O  | -5.17119600 | -0.59816400 | 4.79635700  |
| O  | -5.72999800 | 0.82031400  | 3.25512700  |
| N  | -4.54772900 | 3.06578800  | 4.20664600  |
| O  | -5.55333500 | 3.69508300  | 4.49550400  |
| O  | -3.96982800 | 2.28881600  | 4.96021400  |
| N  | -3.23552300 | 6.35984600  | 0.87535300  |
| O  | -3.95213000 | 7.14709500  | 1.48211200  |

|   |             |             |             |
|---|-------------|-------------|-------------|
| O | -2.54291200 | 6.65940800  | -0.09052900 |
| H | 3.38409500  | -2.42933500 | -0.89251800 |

#### AD 6

|    |             |             |             |
|----|-------------|-------------|-------------|
| H  | 2.08885900  | -0.87661600 | -3.32916100 |
| C  | 1.73751400  | -0.05073200 | -2.72903400 |
| H  | 3.57974500  | 1.20078000  | -2.49363600 |
| C  | 2.53167500  | 1.05076600  | -2.28344000 |
| H  | -0.40120900 | -0.57516900 | -2.36601800 |
| C  | 0.42656700  | 0.09375700  | -2.21757300 |
| C  | 1.71980900  | 1.88193300  | -1.48191400 |
| C  | 0.37894200  | 1.31639900  | -1.44470100 |
| H  | 2.02218900  | 2.79301300  | -0.98729800 |
| Fe | 1.76956500  | 0.00436000  | -0.63607900 |
| H  | 4.43435100  | -0.56432100 | 0.10881200  |
| C  | 2.57745500  | -1.80497100 | -0.02547100 |
| C  | 3.40854400  | -0.72812900 | 0.40290400  |
| C  | 1.28789400  | -1.62832300 | 0.55952200  |
| C  | 2.63465900  | 0.11651500  | 1.25364500  |
| H  | 2.97238600  | 1.02783900  | 1.72336800  |
| C  | 1.32705700  | -0.44333700 | 1.35123900  |
| H  | 0.49675200  | -0.01978900 | 1.89660000  |
| C  | -0.61923500 | 1.90892500  | -0.61257400 |
| H  | -0.22804700 | 2.73411900  | -0.02223900 |
| H  | 0.42944600  | -2.26572000 | 0.41174800  |
| C  | -1.96327300 | 1.71267700  | -0.38555200 |
| C  | -2.56839800 | 2.61496300  | 0.61628200  |
| C  | -2.81724000 | 0.73172900  | -1.05676000 |
| N  | -3.94067800 | 2.45716500  | 0.83625000  |
| O  | -1.96880900 | 3.46918700  | 1.25216100  |
| N  | -4.17168100 | 0.75188500  | -0.68279300 |
| O  | -2.47042600 | -0.08147700 | -1.89932000 |
| H  | -4.35306800 | 3.07465300  | 1.52470600  |
| C  | -4.77449500 | 1.56213700  | 0.23234200  |
| H  | -4.76173400 | 0.07391100  | -1.14937400 |
| S  | -6.40476400 | 1.46796200  | 0.58725400  |
| H  | 2.86519700  | -2.59745800 | -0.69977500 |

#### AD 7

|    |             |             |             |
|----|-------------|-------------|-------------|
| H  | 2.08586900  | -0.86581400 | -3.33698200 |
| C  | 1.73241600  | -0.04460100 | -2.73163900 |
| H  | 3.56808800  | 1.21708100  | -2.49785800 |
| C  | 2.52178100  | 1.05945600  | -2.28432400 |
| H  | -0.40268400 | -0.58181300 | -2.36188900 |
| C  | 0.42217300  | 0.09083100  | -2.21432100 |
| C  | 1.70702500  | 1.88247100  | -1.47629800 |
| C  | 0.37081300  | 1.30844100  | -1.43539500 |
| H  | 2.00599100  | 2.79309900  | -0.97868800 |
| Fe | 1.77359200  | 0.00104600  | -0.63974700 |
| H  | 4.44251500  | -0.55321400 | 0.10385700  |
| C  | 2.59323800  | -1.80497600 | -0.03456400 |

|   |             |             |             |
|---|-------------|-------------|-------------|
| C | 3.41753900  | -0.72407500 | 0.39691400  |
| C | 1.30251300  | -1.63792600 | 0.55079300  |
| C | 2.63813500  | 0.11339100  | 1.24974600  |
| H | 2.97014100  | 1.02556500  | 1.72195800  |
| C | 1.33377700  | -0.45458300 | 1.34542600  |
| H | 0.50084400  | -0.03790500 | 1.89205100  |
| C | -0.63197500 | 1.90045600  | -0.60383400 |
| H | -0.24055500 | 2.72499800  | -0.01252700 |
| H | 0.44807100  | -2.28025700 | 0.40095900  |
| C | -1.97386400 | 1.70791800  | -0.37843200 |
| C | -2.57802700 | 2.62063400  | 0.62195100  |
| C | -2.82932900 | 0.72160000  | -1.04950600 |
| N | -3.94402900 | 2.47195600  | 0.84112400  |
| O | -1.96554700 | 3.47335100  | 1.24972900  |
| N | -4.17806700 | 0.74318000  | -0.68345200 |
| O | -2.46847700 | -0.09316500 | -1.88622200 |
| H | -4.36412200 | 3.09075400  | 1.52376300  |
| C | -4.79256900 | 1.56779300  | 0.23510000  |
| H | -4.77574900 | 0.06760300  | -1.14383300 |
| O | -5.98144900 | 1.50429300  | 0.49079800  |
| H | 2.88610300  | -2.59410000 | -0.71063600 |

#### AD 8

|    |             |             |             |
|----|-------------|-------------|-------------|
| H  | -3.40142800 | -2.11378100 | 1.84751100  |
| C  | -2.84713900 | -1.19482300 | 1.73080500  |
| H  | -4.30341500 | 0.35814900  | 2.42106600  |
| C  | -3.32577700 | 0.11557300  | 2.03305100  |
| H  | -0.92529600 | -1.90933600 | 0.87193400  |
| C  | -1.53071300 | -1.08329400 | 1.21018400  |
| C  | -2.31022300 | 1.04532500  | 1.69658900  |
| C  | -1.16967700 | 0.31328400  | 1.19744700  |
| H  | -2.36345600 | 2.11909800  | 1.79826000  |
| Fe | -2.84207000 | -0.02124700 | 0.00763100  |
| H  | -5.53460800 | 0.57053300  | -0.62533300 |
| C  | -4.07778400 | -0.95472200 | -1.37355700 |
| C  | -4.57676300 | 0.34678000  | -1.07056400 |
| C  | -2.76491600 | -0.80952300 | -1.91405300 |
| C  | -3.57294100 | 1.29775500  | -1.42283400 |
| H  | -3.63866100 | 2.36779700  | -1.29550900 |
| C  | -2.45533300 | 0.58205100  | -1.94565700 |
| H  | -1.52215900 | 1.01587700  | -2.27299800 |
| H  | -2.11229100 | -1.61231800 | -2.22235800 |
| C  | 1.22945000  | 0.41450000  | 0.39618800  |
| S  | 1.70664400  | -1.28977600 | 0.37471800  |
| C  | 2.36314000  | 1.25460000  | -0.02449900 |
| C  | 3.34039500  | -0.89647100 | -0.16752500 |
| O  | 2.37793400  | 2.46861400  | -0.12331600 |
| N  | 3.48715700  | 0.45420700  | -0.31583200 |
| S  | 4.48106900  | -2.06831800 | -0.44532700 |
| C  | 4.74670600  | 1.08818300  | -0.74546700 |
| H  | 4.46179000  | 1.98482800  | -1.29465400 |

|   |             |             |             |
|---|-------------|-------------|-------------|
| H | 5.23382800  | 0.39494500  | -1.42944800 |
| C | 5.65702300  | 1.43501600  | 0.43061200  |
| H | 5.16889800  | 2.13435700  | 1.11237000  |
| H | 5.93999600  | 0.53924100  | 0.98665600  |
| H | 6.56846700  | 1.90556800  | 0.05398700  |
| C | 0.03942400  | 0.95358500  | 0.74829200  |
| H | 0.00818500  | 2.03927600  | 0.70130400  |
| H | -4.59224700 | -1.88758600 | -1.19817000 |

### AD 9

|    |             |             |             |
|----|-------------|-------------|-------------|
| H  | 2.09393000  | -0.84769000 | -3.31982600 |
| C  | 1.73848700  | -0.03655800 | -2.70213200 |
| H  | 3.58118900  | 1.20331900  | -2.41296900 |
| C  | 2.53037200  | 1.05032500  | -2.21904600 |
| H  | -0.40519700 | -0.56339900 | -2.37773100 |
| C  | 0.42152400  | 0.09952000  | -2.20226700 |
| C  | 1.70983800  | 1.86265100  | -1.40633900 |
| C  | 0.36726400  | 1.30070700  | -1.39773300 |
| H  | 2.00907400  | 2.75943800  | -0.88429400 |
| Fe | 1.74771300  | -0.03694600 | -0.60963500 |
| H  | 4.40022700  | -0.62658600 | 0.16489800  |
| C  | 2.54519800  | -1.86191800 | -0.03196600 |
| C  | 3.36942100  | -0.79675900 | 0.43717700  |
| C  | 1.24607200  | -1.69895100 | 0.53576300  |
| C  | 2.58159900  | 0.02687200  | 1.29578000  |
| H  | 2.91177900  | 0.92593300  | 1.79370900  |
| C  | 1.27214100  | -0.53409100 | 1.35740800  |
| H  | 0.43295200  | -0.12370200 | 1.89919500  |
| C  | -0.63638500 | 1.88976900  | -0.56437400 |
| H  | -0.23640300 | 2.69697800  | 0.04376800  |
| H  | 0.38996400  | -2.33176900 | 0.35765200  |
| C  | -1.98446500 | 1.71702400  | -0.34682500 |
| C  | -2.57603500 | 2.61998600  | 0.65309900  |
| C  | -2.83767500 | 0.75517500  | -1.03013600 |
| N  | -3.96477800 | 2.52783900  | 0.86006700  |
| O  | -1.92671600 | 3.43807500  | 1.29202600  |
| N  | -4.20332700 | 0.73850400  | -0.66244200 |
| O  | -2.44575600 | -0.02679900 | -1.88488800 |
| C  | -4.78741200 | 1.60273300  | 0.24345900  |
| C  | -4.52644300 | 3.49247500  | 1.84167900  |
| C  | -4.49146000 | 2.96522900  | 3.27353400  |
| H  | -5.54400000 | 3.70675600  | 1.52985300  |
| H  | -3.92835400 | 4.39577500  | 1.75283400  |
| H  | -4.90682100 | 3.72101500  | 3.94547300  |
| H  | -5.08844900 | 2.05684200  | 3.37357200  |
| H  | -3.46817500 | 2.75461600  | 3.59016300  |
| C  | -5.02988600 | -0.28399000 | -1.35545900 |
| C  | -5.60684600 | 0.21973900  | -2.67573500 |
| H  | -5.82056300 | -0.57167200 | -0.66948500 |
| H  | -4.37758800 | -1.13675100 | -1.52480100 |
| H  | -6.19326000 | -0.57763600 | -3.14001300 |

|   |             |             |             |
|---|-------------|-------------|-------------|
| H | -6.26430100 | 1.07651700  | -2.51673700 |
| H | -4.81295000 | 0.50528000  | -3.36848300 |
| S | -6.43464500 | 1.53381900  | 0.58614300  |
| H | 2.84398700  | -2.63776300 | -0.72069800 |

#### AD 10

|    |             |             |             |
|----|-------------|-------------|-------------|
| H  | 2.07391400  | -0.87355700 | -3.33755300 |
| C  | 1.71880400  | -0.05186300 | -2.73374200 |
| H  | 3.54600500  | 1.22575800  | -2.51900700 |
| C  | 2.50251100  | 1.06032600  | -2.29754000 |
| H  | -0.40944700 | -0.60320000 | -2.34554700 |
| C  | 0.41058100  | 0.07697000  | -2.20779900 |
| C  | 1.68536600  | 1.88098000  | -1.48842100 |
| C  | 0.35464300  | 1.29697400  | -1.43428800 |
| H  | 1.98067500  | 2.79630700  | -0.99716100 |
| Fe | 1.77575600  | 0.00384800  | -0.64394300 |
| H  | 4.45256300  | -0.51434000 | 0.10040700  |
| C  | 2.61837400  | -1.78916500 | -0.03069300 |
| C  | 3.42973700  | -0.69597000 | 0.39458800  |
| C  | 1.32614700  | -1.63484200 | 0.55498500  |
| C  | 2.64064800  | 0.13629700  | 1.24364100  |
| H  | 2.96191700  | 1.05485100  | 1.71095600  |
| C  | 1.34313400  | -0.44685400 | 1.34317000  |
| H  | 0.50554100  | -0.03759300 | 1.88826600  |
| C  | -0.64871200 | 1.89852800  | -0.60492900 |
| H  | -0.25165500 | 2.72665400  | -0.02297100 |
| H  | 0.47946300  | -2.28828300 | 0.40896000  |
| C  | -1.98968400 | 1.71871500  | -0.37316600 |
| C  | -2.58339800 | 2.64724100  | 0.61351900  |
| C  | -2.84595100 | 0.72843600  | -1.02794500 |
| N  | -3.95319900 | 2.53881400  | 0.84367300  |
| O  | -1.94147800 | 3.49278500  | 1.22627100  |
| N  | -4.20479800 | 0.74981500  | -0.69144800 |
| O  | -2.45758400 | -0.09940500 | -1.84224800 |
| C  | -4.79536000 | 1.61906300  | 0.22174400  |
| O  | -5.98923400 | 1.57749600  | 0.46804100  |
| C  | -4.53734300 | 3.46924300  | 1.82228100  |
| H  | -4.06875100 | 3.32118500  | 2.79497700  |
| H  | -4.36495900 | 4.49580400  | 1.50020500  |
| H  | -5.60115600 | 3.27025000  | 1.88555000  |
| C  | -5.06276900 | -0.23850000 | -1.36356900 |
| H  | -5.01888200 | -0.09013200 | -2.44226900 |
| H  | -4.71542700 | -1.24516000 | -1.13205700 |
| H  | -6.07797000 | -0.10262800 | -1.00844700 |
| H  | 2.92048600  | -2.57851000 | -0.70246200 |

#### AD 11

|   |            |             |             |
|---|------------|-------------|-------------|
| H | 2.16276800 | -0.16092900 | -3.38558500 |
| C | 1.78402100 | 0.51048800  | -2.62989400 |
| H | 3.55460500 | 1.80222000  | -2.17663700 |
| C | 2.52222500 | 1.54988100  | -1.98772000 |

|    |             |             |             |
|----|-------------|-------------|-------------|
| H  | -0.29719500 | -0.21901500 | -2.35165300 |
| C  | 0.47655100  | 0.48036000  | -2.07685200 |
| C  | 1.67747800  | 2.16512600  | -1.03029600 |
| C  | 0.38503500  | 1.52259000  | -1.08367100 |
| H  | 1.93897300  | 2.98069400  | -0.37257300 |
| Fe | 1.86912000  | 0.15760400  | -0.57670200 |
| H  | 4.56927700  | -0.36653900 | 0.08297200  |
| C  | 2.79860100  | -1.67822700 | -0.30787400 |
| C  | 3.55554700  | -0.64829100 | 0.32532500  |
| C  | 1.49976400  | -1.69857300 | 0.28322300  |
| C  | 2.72546600  | -0.03053100 | 1.30788900  |
| H  | 3.00124400  | 0.79780100  | 1.94296800  |
| C  | 1.45674200  | -0.68184600 | 1.28201900  |
| H  | 0.60009300  | -0.42460600 | 1.88708700  |
| H  | 0.68614400  | -2.35221500 | 0.00710400  |
| C  | -2.00492500 | 1.49569800  | -0.24970700 |
| S  | -2.79641500 | 0.37621700  | -1.36982200 |
| C  | -2.98509200 | 2.00541500  | 0.72328700  |
| C  | -4.36229200 | 0.58688500  | -0.58382700 |
| O  | -2.77923800 | 2.79351600  | 1.62783300  |
| N  | -4.25958800 | 1.45482400  | 0.46780400  |
| S  | -5.72764000 | -0.19288700 | -1.11071400 |
| C  | -5.40344600 | 1.82313600  | 1.32491900  |
| H  | -6.28796400 | 1.80884700  | 0.68623800  |
| H  | -5.22454900 | 2.84153200  | 1.66715100  |
| C  | -0.71100600 | 1.89097400  | -0.22571800 |
| H  | -0.47789500 | 2.61340500  | 0.55252900  |
| C  | -5.57052800 | 0.88428400  | 2.48964100  |
| H  | -5.70347700 | -0.16500000 | 2.24013000  |
| C  | -5.59262000 | 1.28120800  | 3.75917100  |
| H  | -5.74842100 | 0.57592900  | 4.56770800  |
| H  | -5.46202800 | 2.32358300  | 4.03334100  |
| H  | 3.13966300  | -2.31221600 | -1.11249500 |

#### ADA 0

|    |             |             |             |
|----|-------------|-------------|-------------|
| H  | 1.72776000  | -0.91708700 | -3.37467100 |
| C  | 1.50162000  | -0.06230100 | -2.75518900 |
| H  | 3.41468700  | 1.09831300  | -2.80161100 |
| C  | 2.39988300  | 1.00329100  | -2.44727200 |
| H  | -0.57745100 | -0.49439900 | -2.09383200 |
| C  | 0.28154200  | 0.15521500  | -2.06871300 |
| C  | 1.74151800  | 1.89139100  | -1.56410600 |
| C  | 0.40587000  | 1.38888700  | -1.32964800 |
| H  | 2.15105500  | 2.79324300  | -1.13441700 |
| Fe | 1.82757700  | 0.02500900  | -0.68615000 |
| H  | 4.55391300  | -0.39124300 | -0.07836300 |
| C  | 2.73985600  | -1.73319800 | -0.07496200 |
| C  | 3.55671400  | -0.59577600 | 0.27465600  |
| C  | 1.46759600  | -1.56321000 | 0.59267000  |
| C  | 2.80753400  | 0.22650500  | 1.15214200  |
| H  | 3.14038700  | 1.16292000  | 1.57302800  |

|   |             |             |             |
|---|-------------|-------------|-------------|
| C | 1.52601400  | -0.37171800 | 1.35086100  |
| H | 0.72328800  | 0.03755600  | 1.94533900  |
| C | -0.51487200 | 2.04647100  | -0.44512700 |
| H | -0.10050500 | 2.88180000  | 0.11031000  |
| C | -1.83838400 | 1.78906100  | -0.22314700 |
| C | 3.00398700  | -2.83777900 | -0.95404000 |
| H | 2.14816800  | -3.47086000 | -1.16595800 |
| C | 4.17918400  | -3.22043400 | -1.53709600 |
| H | 0.63050400  | -2.24127700 | 0.52252600  |
| C | 5.42363800  | -2.54681800 | -1.35878900 |
| N | 6.44265800  | -2.01690900 | -1.22655600 |
| C | 4.21230400  | -4.36913100 | -2.38531000 |
| N | 4.24535400  | -5.29822300 | -3.07287400 |
| C | -2.57877100 | 0.75902000  | -0.87503500 |
| N | -3.19775400 | -0.06880600 | -1.39294000 |
| C | -2.57047400 | 2.58216400  | 0.71240300  |
| N | -3.16786600 | 3.22103600  | 1.46872000  |

### ADA 1

|    |             |             |             |
|----|-------------|-------------|-------------|
| H  | 1.85832800  | -1.30332400 | -3.39385300 |
| C  | 1.48077700  | -0.41631900 | -2.90727100 |
| H  | 3.16350100  | 1.03859900  | -3.16893300 |
| C  | 2.17868400  | 0.82400000  | -2.78305300 |
| H  | -0.51639800 | -1.07276100 | -2.13864700 |
| C  | 0.23721000  | -0.31028600 | -2.23722700 |
| C  | 1.36769700  | 1.70716900  | -2.03080400 |
| C  | 0.13781400  | 1.02228300  | -1.69364600 |
| H  | 1.61171800  | 2.72070900  | -1.74893400 |
| Fe | 1.78183300  | 0.04061400  | -0.88612400 |
| H  | 4.54823200  | 0.16802600  | -0.28693400 |
| C  | 2.99218200  | -1.42195600 | -0.04263800 |
| C  | 3.59277100  | -0.12026800 | 0.11728400  |
| C  | 1.70562800  | -1.37639700 | 0.62056600  |
| C  | 2.70606300  | 0.68314000  | 0.87646000  |
| H  | 2.86598300  | 1.71597200  | 1.14684700  |
| C  | 1.54695900  | -0.09182000 | 1.18995300  |
| H  | 0.68045200  | 0.25766900  | 1.73092800  |
| C  | -0.88099900 | 1.64562100  | -0.89188100 |
| H  | -0.60360300 | 2.63312300  | -0.52364800 |
| C  | 3.43572900  | -2.58746300 | -0.75961900 |
| H  | 2.69369600  | -3.38469500 | -0.79738800 |
| H  | 0.99980700  | -2.19213100 | 0.66845300  |
| C  | 4.60330200  | -2.90920700 | -1.37973400 |
| C  | 4.75797700  | -4.24324700 | -2.02838100 |
| C  | 5.87842500  | -2.17232700 | -1.56026800 |
| C  | 6.13849800  | -4.29597900 | -2.58426500 |
| C  | 6.79131900  | -3.08900600 | -2.30879700 |
| C  | 6.77715800  | -5.31900800 | -3.27659100 |
| C  | 8.10213000  | -2.87180500 | -2.71887300 |
| C  | 8.09281800  | -5.10486900 | -3.68981000 |
| H  | 6.26723200  | -6.25153100 | -3.48695300 |

|   |             |             |             |
|---|-------------|-------------|-------------|
| C | 8.74734300  | -3.89568200 | -3.41413900 |
| H | 8.60425100  | -1.93611300 | -2.50379900 |
| H | 8.61931900  | -5.88188900 | -4.23163800 |
| H | 9.76934100  | -3.75774600 | -3.74749300 |
| C | -2.13327200 | 1.26470500  | -0.52092900 |
| C | -2.96992600 | 2.17213100  | 0.31634700  |
| C | -2.93438600 | 0.04741300  | -0.80103900 |
| C | -4.27747100 | 1.48911900  | 0.51976600  |
| C | -4.25624300 | 0.25190300  | -0.13425000 |
| C | -5.40085900 | 1.91445900  | 1.22053800  |
| C | -5.35895200 | -0.59463400 | -0.10558900 |
| C | -6.50960100 | 1.06749800  | 1.25182100  |
| H | -5.41229200 | 2.87321700  | 1.72507600  |
| C | -6.48880500 | -0.17206800 | 0.59637900  |
| H | -5.33846000 | -1.55150500 | -0.61339600 |
| H | -7.40125900 | 1.36868300  | 1.78920600  |
| H | -7.36485000 | -0.80879700 | 0.63776800  |
| O | -2.62252900 | -0.94695800 | -1.43956900 |
| O | -2.65156400 | 3.26697600  | 0.75361200  |
| O | 6.17209600  | -1.04424800 | -1.19243100 |
| O | 3.91935000  | -5.12842600 | -2.09379000 |

## ADA 2

|    |             |             |             |
|----|-------------|-------------|-------------|
| H  | -0.14668100 | -3.60925400 | -0.56788100 |
| C  | -0.30350300 | -2.56074200 | -0.77411100 |
| H  | 0.31292300  | -2.38464600 | -2.92269400 |
| C  | -0.05370000 | -1.91053800 | -2.02483400 |
| H  | -0.98429600 | -1.76028100 | 1.19285400  |
| C  | -0.73490800 | -1.59183900 | 0.16047000  |
| C  | -0.31924300 | -0.53404500 | -1.86471700 |
| C  | -0.76933200 | -0.31033300 | -0.50350000 |
| H  | -0.20835900 | 0.23302100  | -2.61676700 |
| Fe | 1.16462900  | -1.08464600 | -0.53415500 |
| H  | 3.31231300  | -0.40318100 | -2.26047900 |
| C  | 3.09901700  | -1.85760700 | -0.56774000 |
| C  | 3.06349300  | -0.57442600 | -1.22842300 |
| C  | 2.64948300  | -1.63764300 | 0.79426300  |
| C  | 2.63197800  | 0.39180200  | -0.29114400 |
| H  | 2.47439000  | 1.44071700  | -0.49473500 |
| C  | 2.38312800  | -0.26172000 | 0.95803700  |
| H  | 2.01675100  | 0.20988500  | 1.85731300  |
| C  | -1.02872900 | 1.02045700  | -0.02585500 |
| H  | -0.70097400 | 1.76820600  | -0.73898500 |
| C  | 3.35869500  | -3.18704800 | -1.04897600 |
| H  | 3.03181100  | -3.93674800 | -0.33750400 |
| H  | 2.53940500  | -2.40669700 | 1.54440200  |
| C  | -1.64558100 | 1.50010200  | 1.09786200  |
| C  | -1.83326400 | 2.92345900  | 1.40676800  |
| C  | -2.42856000 | 0.72482200  | 2.10647600  |
| C  | -2.88256700 | 3.01935000  | 2.44430300  |
| C  | -3.21165400 | 1.72194800  | 2.87370400  |



|   |             |             |             |
|---|-------------|-------------|-------------|
| C | -3.52852500 | 4.11631800  | 3.02192200  |
| C | -4.14986700 | 1.48728300  | 3.86858700  |
| C | 3.97476800  | -3.66355400 | -2.17445600 |
| C | 4.75658100  | -2.88535200 | -3.18172800 |
| C | 4.16248200  | -5.08603200 | -2.48739500 |
| C | 5.53899100  | -3.88021500 | -3.95258000 |
| C | 5.21060800  | -5.17885400 | -3.52639800 |
| C | 6.47605300  | -3.64264100 | -4.94785900 |
| C | 5.85608500  | -6.27410800 | -4.10779300 |
| C | 7.11398800  | -4.73976000 | -5.52534400 |
| C | 6.80692300  | -6.03740000 | -5.10157700 |
| H | 5.65045900  | -7.28958800 | -3.80523800 |
| H | 7.31714300  | -6.88000400 | -5.55294600 |
| H | 7.85331300  | -4.59052700 | -6.30317200 |
| H | 6.70130800  | -2.62932200 | -5.25807100 |
| C | -4.48052500 | 3.88251300  | 4.01528100  |
| C | -4.78827500 | 2.58610400  | 4.44230400  |
| H | -4.37562500 | 0.47486100  | 4.18135800  |
| H | -5.52850000 | 2.43915100  | 5.21971000  |
| H | -4.99112600 | 4.72644600  | 4.46372700  |
| H | -3.32239700 | 5.13092300  | 2.71678100  |
| C | 3.43599700  | -6.14926700 | -1.99119400 |
| C | -1.10589400 | 3.98512100  | 0.90851200  |
| C | 3.68798800  | -7.50776400 | -2.34037200 |
| N | 3.84826500  | -8.62743900 | -2.58424800 |
| C | 2.31163300  | -6.01277800 | -1.12522400 |
| N | 1.37764100  | -5.96328900 | -0.44339300 |
| C | -1.35800600 | 5.34466300  | 1.25350300  |
| N | -1.51833400 | 6.46506900  | 1.49396300  |
| C | 0.01954100  | 3.84586000  | 0.04438400  |
| N | 0.95441800  | 3.79409900  | -0.63606400 |
| O | -2.46234400 | -0.48232100 | 2.27345600  |
| O | 4.78997000  | -1.67774600 | -3.34541700 |

### ADA 3

|    |             |             |             |
|----|-------------|-------------|-------------|
| H  | 0.48274200  | -2.93153500 | -2.05473000 |
| C  | 0.23441800  | -1.88164800 | -2.09152600 |
| H  | 1.18272800  | -1.21558800 | -4.00553200 |
| C  | 0.61280500  | -0.97144400 | -3.12227100 |
| H  | -0.85292700 | -1.58421200 | -0.17437300 |
| C  | -0.47366300 | -1.16661800 | -1.09280400 |
| C  | 0.14807900  | 0.31772400  | -2.76354700 |
| C  | -0.56257100 | 0.21022600  | -1.50900100 |
| H  | 0.28284700  | 1.22871200  | -3.32696300 |
| Fe | 1.42587700  | -0.35576100 | -1.29386800 |
| H  | 3.97244900  | -0.41473300 | -2.47756600 |
| C  | 3.16578600  | -1.19277700 | -0.52245400 |
| C  | 3.47709800  | -0.22107900 | -1.53982600 |
| C  | 2.42611000  | -0.49981300 | 0.50946800  |
| C  | 2.97383300  | 1.03625400  | -1.11991600 |
| H  | 3.03303600  | 1.95732300  | -1.67928100 |

|   |             |             |             |
|---|-------------|-------------|-------------|
| C | 2.33828700  | 0.86495900  | 0.14661900  |
| H | 1.83772900  | 1.63649300  | 0.71171100  |
| C | -1.07797900 | 1.36600700  | -0.81667600 |
| H | -0.60460300 | 2.28783800  | -1.13345500 |
| C | 3.35164500  | -2.62269000 | -0.50644700 |
| H | 2.63143600  | -3.12942400 | 0.12488800  |
| H | 2.03237700  | -0.95326200 | 1.40648800  |
| C | -1.97239200 | 1.46613400  | 0.20943600  |
| C | -2.05753200 | 2.64327200  | 1.09930400  |
| C | -2.78877400 | 0.41785300  | 0.84445800  |
| C | -2.48864000 | 2.13263800  | 2.40734500  |
| C | -2.91045600 | 0.78657800  | 2.25816600  |
| C | -2.52509300 | 2.74369000  | 3.66120300  |
| C | -3.36073800 | 0.05758600  | 3.35761500  |
| C | 4.20490900  | -3.42036700 | -1.21310600 |
| C | 5.30029900  | -3.04457900 | -2.12247100 |
| C | 3.97453500  | -4.86431600 | -1.42825500 |
| C | 5.34823100  | -4.07627400 | -3.16304900 |
| C | 4.56462100  | -5.17884900 | -2.73625600 |
| C | 6.01542400  | -4.11072000 | -4.38645800 |
| C | 4.45686700  | -6.31480200 | -3.53926000 |
| C | 5.88655400  | -5.24536300 | -5.18594600 |
| C | 5.11869400  | -6.33447100 | -4.76594200 |
| H | 3.86313300  | -7.16586400 | -3.24086200 |
| H | 5.02983800  | -7.20570800 | -5.40337000 |
| H | 6.38508200  | -5.27866200 | -6.14704000 |
| H | 6.60633000  | -3.27491200 | -4.73180500 |
| C | -2.96674700 | 2.00251500  | 4.75605100  |
| C | -3.37698800 | 0.67517700  | 4.60721900  |
| H | -3.67282000 | -0.97235800 | 3.26348800  |
| H | -3.70756000 | 0.11504700  | 5.47343000  |
| H | -2.98520400 | 2.46299300  | 5.73629800  |
| H | -2.20574800 | 3.76523800  | 3.80365800  |
| C | 3.38047400  | -5.74898400 | -0.55858200 |
| C | -1.83457000 | 3.95754300  | 0.76068500  |
| C | 3.19435300  | -7.13121300 | -0.85161200 |
| N | 3.02282600  | -8.25903000 | -1.04253200 |
| C | 2.94972800  | -5.38955500 | 0.75223800  |
| N | 2.59543400  | -5.14384100 | 1.82563700  |
| C | -1.93719700 | 5.03410900  | 1.68891000  |
| N | -2.00974000 | 5.94044800  | 2.40383400  |
| C | -1.54320800 | 4.38630000  | -0.56755600 |
| N | -1.31418000 | 4.77852900  | -1.63140300 |
| C | -3.48568800 | -0.56827700 | 0.18914900  |
| C | 6.23239300  | -2.06028300 | -1.89783400 |
| C | -3.55306300 | -0.65324800 | -1.23249700 |
| N | -3.67627600 | -0.73259000 | -2.37934700 |
| C | -4.30742000 | -1.51912400 | 0.86237900  |
| N | -4.97902100 | -2.31105100 | 1.37142900  |
| C | 7.30832100  | -1.78877500 | -2.79300800 |
| N | 8.19078400  | -1.53422700 | -3.49574400 |

|   |            |             |             |
|---|------------|-------------|-------------|
| C | 6.28465800 | -1.30665000 | -0.68875600 |
| N | 6.39522600 | -0.70589800 | 0.29287900  |

#### ADA 4

|    |             |             |             |
|----|-------------|-------------|-------------|
| H  | 1.49498800  | -0.59001700 | -3.49365800 |
| C  | 1.41496400  | 0.23503800  | -2.80194700 |
| H  | 3.47553700  | 1.10882400  | -2.83451300 |
| C  | 2.46824600  | 1.13108600  | -2.44773700 |
| H  | -0.68686500 | 0.05975400  | -2.08662700 |
| C  | 0.26153900  | 0.57292500  | -2.04951900 |
| C  | 1.96982900  | 2.03224500  | -1.47310300 |
| C  | 0.58518900  | 1.71078000  | -1.22636600 |
| H  | 2.52067500  | 2.82769200  | -0.99355200 |
| Fe | 1.81339200  | 0.10123800  | -0.75145600 |
| H  | 4.45573500  | -0.79886900 | -0.31713900 |
| C  | 2.45064700  | -1.82826400 | -0.31282500 |
| C  | 3.45187700  | -0.86587600 | 0.07302800  |
| C  | 1.25002700  | -1.50856800 | 0.42330900  |
| C  | 2.88208400  | -0.00078700 | 1.04149100  |
| H  | 3.37763400  | 0.83604100  | 1.50969100  |
| C  | 1.52811500  | -0.40068500 | 1.25986900  |
| H  | 0.82446000  | 0.08543300  | 1.91857800  |
| C  | -0.25365100 | 2.40466100  | -0.28216100 |
| H  | 0.25664400  | 3.14781500  | 0.31987500  |
| C  | 2.54957500  | -2.89220100 | -1.27753600 |
| H  | 1.61373600  | -3.38322100 | -1.51842600 |
| H  | 0.31127500  | -2.03640000 | 0.34713800  |
| C  | 3.70731300  | -3.32464900 | -1.85232500 |
| H  | 4.63460600  | -2.84358100 | -1.56154400 |
| C  | -1.59167600 | 2.20689800  | -0.12935700 |
| H  | -2.08132100 | 1.47018000  | -0.75783200 |
| C  | 3.83744900  | -4.38425000 | -2.79690300 |
| C  | 2.90498600  | -5.17422600 | -3.44244600 |
| C  | 5.21502500  | -4.82249800 | -3.26011500 |
| C  | 3.60509600  | -6.10952400 | -4.29307900 |
| C  | 3.13955300  | -7.10514700 | -5.13555600 |
| O  | 4.91731000  | -5.91815400 | -4.19578800 |
| C  | 1.76602200  | -7.40178500 | -5.31515200 |
| N  | 0.65901200  | -7.68700700 | -5.49929400 |
| C  | 4.06948300  | -7.88774600 | -5.86960200 |
| N  | 4.81729800  | -8.53287600 | -6.47389100 |
| C  | 5.95164600  | -3.74183100 | -4.05408900 |
| H  | 5.33470500  | -3.37284200 | -4.87490900 |
| H  | 6.20995200  | -2.90474700 | -3.40359800 |
| H  | 6.87412700  | -4.15939500 | -4.46097300 |
| C  | 6.06253800  | -5.41116200 | -2.13081700 |
| H  | 6.31235400  | -4.63559900 | -1.40492800 |
| H  | 5.52624100  | -6.21148400 | -1.61871300 |
| H  | 6.99038400  | -5.81012500 | -2.54402100 |
| C  | -2.44133100 | 2.88244200  | 0.79196400  |
| C  | -3.79626700 | 2.64823200  | 0.92383000  |

|   |             |             |             |
|---|-------------|-------------|-------------|
| C | -2.05683500 | 3.96528600  | 1.78640300  |
| C | 1.49969700  | -5.08361200 | -3.31799200 |
| N | 0.35504600  | -4.97448700 | -3.19147200 |
| C | -4.52247700 | 1.70274900  | 0.16142900  |
| N | -5.06354700 | 0.91587500  | -0.49065300 |
| C | -4.32345600 | 3.51393000  | 1.94969500  |
| O | -3.34533800 | 4.26480400  | 2.44644000  |
| C | -5.60477000 | 3.66170100  | 2.45144200  |
| C | -1.11633900 | 3.48487500  | 2.89380200  |
| H | -1.49749300 | 2.57449700  | 3.35894300  |
| H | -0.12194300 | 3.28316800  | 2.49564700  |
| H | -1.03247800 | 4.26377600  | 3.65336200  |
| C | -1.60379600 | 5.27117300  | 1.12978800  |
| H | -0.63203900 | 5.14661000  | 0.65204700  |
| H | -2.32340500 | 5.59570400  | 0.37669300  |
| H | -1.51629400 | 6.04418800  | 1.89489700  |
| C | -5.84796200 | 4.60829500  | 3.48124800  |
| N | -6.05756900 | 5.37722000  | 4.32101700  |
| C | -6.71144100 | 2.90721400  | 1.98955300  |
| N | -7.64570900 | 2.31537900  | 1.64687500  |

#### ADA 5

|    |             |             |             |
|----|-------------|-------------|-------------|
| H  | 0.77314900  | -2.01508600 | -2.97878600 |
| C  | 0.64309700  | -1.01202800 | -2.60086500 |
| H  | 2.06350900  | 0.19360300  | -3.84703000 |
| C  | 1.32707600  | 0.15230300  | -3.05899700 |
| H  | -0.88621500 | -1.31817100 | -1.03030300 |
| C  | -0.21390800 | -0.64458000 | -1.53320500 |
| C  | 0.88283400  | 1.24898200  | -2.28337100 |
| C  | -0.09001100 | 0.78011300  | -1.32515300 |
| H  | 1.21415400  | 2.27284300  | -2.37591000 |
| Fe | 1.74636800  | -0.16712300 | -1.03193100 |
| H  | 4.54707200  | -0.30435900 | -1.61139700 |
| C  | 3.15538800  | -1.54049700 | -0.32540000 |
| C  | 3.80303600  | -0.35421300 | -0.83510100 |
| C  | 2.29420600  | -1.10492800 | 0.74944300  |
| C  | 3.35785700  | 0.75810100  | -0.07627900 |
| H  | 3.66312900  | 1.78213400  | -0.22838400 |
| C  | 2.42213900  | 0.29622200  | 0.89507300  |
| H  | 1.88178100  | 0.91372300  | 1.59655400  |
| C  | -0.79824200 | 1.70724100  | -0.47025700 |
| H  | -0.66818000 | 2.72938900  | -0.81468600 |
| C  | 3.30733800  | -2.94636600 | -0.62822300 |
| H  | 2.89872700  | -3.55953500 | 0.17014600  |
| H  | 1.66802500  | -1.76010500 | 1.33716500  |
| C  | -1.63120400 | 1.58890400  | 0.60331000  |
| C  | -2.38799600 | 2.73349700  | 1.12684600  |
| C  | -2.02433500 | 0.46028400  | 1.44662900  |
| C  | -2.37578600 | 4.05677000  | 0.69141500  |
| C  | -3.21070300 | 2.31943400  | 2.20957300  |
| C  | -1.49526000 | -0.82548400 | 1.52189400  |

|   |             |             |             |
|---|-------------|-------------|-------------|
| C | -3.05720200 | 0.87138300  | 2.34188600  |
| C | -3.16228600 | 4.97525800  | 1.36589500  |
| H | -1.77551000 | 4.38577000  | -0.14465000 |
| C | -3.90751200 | 3.32020100  | 2.91236300  |
| C | -2.06104900 | -1.72617000 | 2.41019600  |
| H | -0.64696100 | -1.12665300 | 0.93073100  |
| C | -3.67554700 | -0.12533200 | 3.11872100  |
| C | -3.91543800 | 4.63641200  | 2.48762000  |
| C | -3.17726800 | -1.41466800 | 3.18025000  |
| H | -4.46194200 | 5.38910700  | 3.03549300  |
| H | -3.65615800 | -2.16164800 | 3.79522200  |
| C | 3.88913300  | -3.66580700 | -1.63065200 |
| C | 4.46995700  | -3.29964200 | -2.92198500 |
| C | 4.06183500  | -5.12125700 | -1.53751800 |
| C | 4.43749900  | -2.08667300 | -3.60486100 |
| C | 5.06931000  | -4.44995900 | -3.51840100 |
| C | 3.67997300  | -5.97840500 | -0.50755100 |
| C | 4.72175100  | -5.60905200 | -2.69801800 |
| C | 5.08697400  | -1.99297700 | -4.82556500 |
| H | 3.90219500  | -1.23398200 | -3.22324400 |
| C | 5.82096400  | -4.25436800 | -4.69130900 |
| C | 3.92488100  | -7.33272100 | -0.65840400 |
| H | 3.20074300  | -5.62373500 | 0.39365900  |
| C | 4.84784100  | -7.00449100 | -2.83254800 |
| C | 5.82095900  | -3.04520400 | -5.36390600 |
| C | 4.48301800  | -7.86903500 | -1.81655900 |
| H | 6.39261800  | -2.91908100 | -6.27095300 |
| H | 4.59409500  | -8.93630500 | -1.93453100 |
| N | 5.03611800  | -0.71838600 | -5.56197000 |
| O | 5.67370000  | -0.63208700 | -6.60352300 |
| O | 4.35272400  | 0.18600500  | -5.09244700 |
| N | 6.77397000  | -5.25888300 | -5.19625400 |
| O | 7.32021400  | -5.97367300 | -4.36213400 |
| O | 7.01129200  | -5.28146900 | -6.39351400 |
| N | 5.20902200  | -7.65248400 | -4.10584200 |
| O | 4.81563300  | -7.11156800 | -5.13440600 |
| O | 5.81607700  | -8.71059900 | -4.06483200 |
| N | 3.53492100  | -8.25435400 | 0.42511600  |
| O | 3.74543600  | -9.45000600 | 0.26185300  |
| O | 3.02587000  | -7.77183300 | 1.42962300  |
| N | -1.48695100 | -3.07878900 | 2.51309700  |
| O | -2.04483600 | -3.88404300 | 3.24726000  |
| O | -0.47666100 | -3.32157400 | 1.86056400  |
| N | -4.97022000 | 0.08584300  | 3.79053000  |
| O | -5.21643600 | -0.56707200 | 4.79217700  |
| O | -5.75084300 | 0.86725900  | 3.25651300  |
| N | -4.53054000 | 3.08388300  | 4.22682200  |
| O | -5.52587100 | 3.72693900  | 4.51909700  |
| O | -3.96474700 | 2.29235600  | 4.97416900  |
| N | -3.16714600 | 6.37930100  | 0.91469800  |
| O | -3.87150700 | 7.17352900  | 1.52580800  |

O -2.47179600 6.67140600 -0.05101200

**ADA 6**

H 2.00385300 -0.91731500 -3.40455000  
C 1.67541500 -0.09008900 -2.79312300  
H 3.52968500 1.15542900 -2.61860700  
C 2.49006800 1.00542600 -2.37095200  
H -0.44818600 -0.61498100 -2.35442300  
C 0.38456700 0.05319600 -2.23360700  
C 1.70561400 1.83474200 -1.53971700  
C 0.36997400 1.26981800 -1.45359400  
H 2.02836400 2.73971400 -1.04679400  
Fe 1.78875500 -0.04427900 -0.69762500  
H 4.44260100 -0.25678200 0.25826200  
C 2.78924200 -1.74031500 -0.03887400  
C 3.43063000 -0.54972900 0.47018600  
C 1.42300700 -1.72058400 0.45609100  
C 2.49319200 0.14941800 1.26623200  
H 2.67066000 1.08901400 1.76714400  
C 1.26100700 -0.57536800 1.26370400  
H 0.34967000 -0.27388900 1.75780500  
C -0.60981800 1.88563600 -0.60604700  
H -0.19639600 2.70831500 -0.02741100  
C 3.20482100 -2.76789900 -0.94914500  
H 2.38060800 -3.41011300 -1.25023200  
H 0.67306800 -2.46686200 0.24088400  
C 4.39177300 -3.16105300 -1.51273300  
C 5.70647500 -2.55239200 -1.27777000  
C 4.30156200 -4.33311800 -2.41593400  
N 5.50818700 -4.78624800 -2.95358600  
H 5.44614100 -5.58817300 -3.56899100  
N 6.78469600 -3.17933600 -1.91905800  
H 7.69251800 -2.76236300 -1.75214100  
O 3.26963700 -4.91415300 -2.71143300  
O 5.93945600 -1.57587900 -0.58418300  
C 6.75229300 -4.26270700 -2.74788900  
C -1.94847500 1.71278000 -0.36382200  
C -2.53296700 2.64372900 0.63084200  
C -2.82594100 0.72916800 -1.00926500  
N -3.90408400 2.51264100 0.86045800  
O -1.91093200 3.49505300 1.24588200  
N -4.17452700 0.78201500 -0.62784700  
O -2.49366100 -0.10746900 -1.83277400  
H -4.30285100 3.14828400 1.54066900  
C -4.75746100 1.62034700 0.27718500  
H -4.78052600 0.10522600 -1.07576900  
S -6.38429900 1.56048000 0.64321600  
S 8.12365000 -4.89716500 -3.45585500

**ADA 7**

H 2.00702500 -0.91497000 -3.40052800

|    |             |             |             |
|----|-------------|-------------|-------------|
| C  | 1.67496500  | -0.08996300 | -2.78803300 |
| H  | 3.52274300  | 1.16517800  | -2.61397400 |
| C  | 2.48411400  | 1.00932200  | -2.36567100 |
| H  | -0.44628200 | -0.62516400 | -2.34701200 |
| C  | 0.38351300  | 0.04675700  | -2.22701800 |
| C  | 1.69537700  | 1.83376900  | -1.53283600 |
| C  | 0.36345900  | 1.26165200  | -1.44550400 |
| H  | 2.01383800  | 2.73991800  | -1.03921600 |
| Fe | 1.79088000  | -0.04602800 | -0.69396400 |
| H  | 4.44778900  | -0.25139700 | 0.25570900  |
| C  | 2.79946900  | -1.73926700 | -0.04052300 |
| C  | 3.43719700  | -0.54774900 | 0.46919800  |
| C  | 1.43471900  | -1.72559800 | 0.45734200  |
| C  | 2.49834900  | 0.14777100  | 1.26765200  |
| H  | 2.67333300  | 1.08758500  | 1.76910400  |
| C  | 1.26892000  | -0.58129200 | 1.26635700  |
| H  | 0.35715300  | -0.28390200 | 1.76214900  |
| C  | -0.62071400 | 1.87685500  | -0.59939500 |
| H  | -0.20778000 | 2.69975300  | -0.02053500 |
| C  | 3.21727300  | -2.76799100 | -0.95148300 |
| H  | 2.39243300  | -3.40996300 | -1.25170600 |
| H  | 0.68722300  | -2.47443800 | 0.24232300  |
| C  | 4.40085300  | -3.16250800 | -1.51625200 |
| C  | 5.71883700  | -2.55064600 | -1.28342500 |
| C  | 4.30374600  | -4.34009100 | -2.41895800 |
| N  | 5.50001800  | -4.79420800 | -2.96130700 |
| H  | 5.44387600  | -5.59621000 | -3.57725700 |
| N  | 6.79215300  | -3.17139500 | -1.92370200 |
| H  | 7.70429900  | -2.76023000 | -1.76603200 |
| O  | 3.26319600  | -4.91460000 | -2.70161000 |
| O  | 5.94109000  | -1.57224600 | -0.58706900 |
| C  | 6.76069800  | -4.26704000 | -2.76220900 |
| O  | 7.75850100  | -4.72892500 | -3.28303500 |
| C  | -1.95801200 | 1.70725500  | -0.35904400 |
| C  | -2.54135000 | 2.64831100  | 0.63350100  |
| C  | -2.83624000 | 0.71912500  | -1.00555100 |
| N  | -3.90720300 | 2.52827000  | 0.85913500  |
| O  | -1.90685600 | 3.49632600  | 1.24269000  |
| N  | -4.18047100 | 0.77500400  | -0.63499300 |
| O  | -2.48968300 | -0.12005000 | -1.82216800 |
| H  | -4.31419600 | 3.16504200  | 1.53341500  |
| C  | -4.77496000 | 1.62867100  | 0.27180500  |
| H  | -4.79381300 | 0.10093800  | -1.07706600 |
| O  | -5.96254600 | 1.59172300  | 0.53336200  |

#### ADA 8

|   |             |             |             |
|---|-------------|-------------|-------------|
| H | 1.94837000  | -1.20954400 | -3.09674500 |
| C | 1.58292600  | -0.36633700 | -2.53016300 |
| H | 3.22145000  | 1.13925900  | -2.76525400 |
| C | 2.26081500  | 0.87580300  | -2.34986400 |
| H | -0.33714100 | -1.14085200 | -1.72171600 |

|    |             |             |             |
|----|-------------|-------------|-------------|
| C  | 0.37001900  | -0.32974000 | -1.79296900 |
| C  | 1.46992300  | 1.68810100  | -1.49821200 |
| C  | 0.27408600  | 0.95855600  | -1.15323800 |
| H  | 1.70922500  | 2.68481000  | -1.15861100 |
| Fe | 1.97233800  | -0.05304700 | -0.50269800 |
| H  | 4.75617800  | 0.04826400  | -0.05593800 |
| C  | 3.20964000  | -1.57979200 | 0.18171700  |
| C  | 3.83145700  | -0.29480900 | 0.38047800  |
| C  | 1.96716700  | -1.56228700 | 0.91578600  |
| C  | 2.99778300  | 0.47395500  | 1.23530100  |
| H  | 3.18618400  | 1.48806800  | 1.55321200  |
| C  | 1.85219600  | -0.30950400 | 1.56761500  |
| H  | 1.02128500  | 0.01245400  | 2.17705600  |
| H  | 1.25720200  | -2.37472900 | 0.95678500  |
| C  | 4.82972800  | -2.93500800 | -1.21162500 |
| S  | 6.27376100  | -1.91361000 | -1.23612400 |
| C  | 5.08452600  | -4.17686200 | -1.96680200 |
| C  | 7.17063100  | -3.08641800 | -2.20717900 |
| O  | 4.30443900  | -5.09360100 | -2.14659700 |
| N  | 6.39593900  | -4.17918200 | -2.48120500 |
| S  | 8.73393300  | -2.81669900 | -2.68572100 |
| C  | 6.87510800  | -5.33482900 | -3.26172400 |
| H  | 7.58266700  | -4.95086400 | -3.99487900 |
| H  | 6.00416900  | -5.72885300 | -3.78415300 |
| C  | 7.51626700  | -6.40679700 | -2.38327300 |
| H  | 8.38709600  | -6.01379100 | -1.85518700 |
| H  | 6.80391500  | -6.79293000 | -1.65148800 |
| H  | 7.84433900  | -7.23820500 | -3.01179500 |
| C  | -1.97720200 | 1.00568300  | 0.00115900  |
| S  | -2.75263200 | -0.46938200 | -0.59155000 |
| C  | -2.89619200 | 1.72352600  | 0.90552700  |
| C  | -4.23013400 | -0.14118500 | 0.32108600  |
| O  | -2.67682800 | 2.77024800  | 1.48657200  |
| N  | -4.11328900 | 1.02489900  | 1.02555800  |
| S  | -5.53227400 | -1.16485100 | 0.28039500  |
| C  | -5.19083200 | 1.56931200  | 1.87224600  |
| H  | -4.69716800 | 2.10136200  | 2.68463700  |
| H  | -5.73081800 | 0.71831600  | 2.28434100  |
| C  | -6.12686500 | 2.49718300  | 1.10104000  |
| H  | -5.58434000 | 3.35245900  | 0.69327100  |
| H  | -6.61898100 | 1.96831300  | 0.28265200  |
| H  | -6.89812300 | 2.87336700  | 1.77746700  |
| C  | 3.64250500  | -2.70710400 | -0.60754100 |
| H  | 2.91821700  | -3.50974100 | -0.72016700 |
| C  | -0.75010800 | 1.49192500  | -0.28849100 |
| H  | -0.51738300 | 2.44016100  | 0.18927500  |

#### ADA 9

|   |            |             |             |
|---|------------|-------------|-------------|
| H | 2.00242000 | -0.89137100 | -3.43596800 |
| C | 1.66417000 | -0.07859900 | -2.81061400 |
| H | 3.50504300 | 1.18243700  | -2.60794300 |



|    |             |             |             |
|----|-------------|-------------|-------------|
| C  | 2.46638000  | 1.01691900  | -2.36605300 |
| H  | -0.45435000 | -0.63298000 | -2.38753600 |
| C  | 0.36988700  | 0.04221600  | -2.25242500 |
| C  | 1.66999000  | 1.82243500  | -1.52219900 |
| C  | 0.33962100  | 1.24320300  | -1.44940800 |
| H  | 1.98218500  | 2.72129300  | -1.01151300 |
| Fe | 1.77256000  | -0.07099500 | -0.71582300 |
| H  | 4.42492200  | -0.27225300 | 0.24499100  |
| C  | 2.79127600  | -1.76948900 | -0.08677700 |
| C  | 3.41643600  | -0.58170800 | 0.44741900  |
| C  | 1.42322000  | -1.77285500 | 0.40397100  |
| C  | 2.46810500  | 0.09350500  | 1.25219900  |
| H  | 2.63374300  | 1.02589800  | 1.77044700  |
| C  | 1.24422700  | -0.64435500 | 1.23199700  |
| H  | 0.32758800  | -0.36226300 | 1.72776800  |
| C  | -0.64394200 | 1.84462900  | -0.59195800 |
| H  | -0.22550900 | 2.65464000  | -0.00015600 |
| C  | 3.21220200  | -2.78156300 | -1.01546700 |
| H  | 2.38533400  | -3.41302400 | -1.32982000 |
| H  | 0.68239000  | -2.52326500 | 0.17197900  |
| C  | 4.39518800  | -3.17539000 | -1.58722400 |
| C  | 5.70167600  | -2.57299000 | -1.34223200 |
| C  | 4.29504500  | -4.32810300 | -2.50229800 |
| N  | 5.49462800  | -4.83014000 | -3.03368300 |
| N  | 6.80566800  | -3.15541000 | -2.00123900 |
| O  | 3.23361900  | -4.85840200 | -2.79978200 |
| O  | 5.88502200  | -1.60947200 | -0.61289700 |
| C  | 6.74227900  | -4.27188200 | -2.81504000 |
| C  | -1.98348300 | 1.68091800  | -0.34792800 |
| C  | -2.55525700 | 2.60461500  | 0.65012900  |
| C  | -2.85548400 | 0.70917600  | -0.99996800 |
| N  | -3.94182000 | 2.53750100  | 0.86433000  |
| O  | -1.88576800 | 3.41617800  | 1.27425900  |
| N  | -4.21659500 | 0.72302700  | -0.62648300 |
| O  | -2.47483800 | -0.10131500 | -1.83170100 |
| C  | -4.78357800 | 1.61734700  | 0.26328900  |
| C  | 8.11313300  | -2.49594600 | -1.74308000 |
| C  | 8.82014100  | -3.05081200 | -0.50953600 |
| H  | 7.89839500  | -1.43799500 | -1.61668900 |
| H  | 8.71868700  | -2.63184200 | -2.63369600 |
| H  | 9.76577700  | -2.52076000 | -0.36833600 |
| H  | 8.21468500  | -2.91039400 | 0.38793700  |
| H  | 9.04036300  | -4.11350600 | -0.62648900 |
| C  | 5.35193700  | -6.02361800 | -3.90921700 |
| C  | 5.11082400  | -5.65553700 | -5.37055200 |
| H  | 4.51230400  | -6.58923100 | -3.51359400 |
| H  | 6.25942700  | -6.60898600 | -3.79855200 |
| H  | 5.00472200  | -6.57073000 | -5.95894400 |
| H  | 4.19572000  | -5.07107400 | -5.48342900 |
| H  | 5.94852500  | -5.08569500 | -5.77690600 |
| C  | -4.48339100 | 3.52405500  | 1.83634100  |

|   |             |             |             |
|---|-------------|-------------|-------------|
| C | -4.45460000 | 3.01197200  | 3.27371200  |
| H | -5.49733400 | 3.75381400  | 1.52393800  |
| H | -3.86892300 | 4.41499400  | 1.73546700  |
| H | -4.85436100 | 3.78288800  | 3.93776300  |
| H | -5.06803100 | 2.11600100  | 3.38540900  |
| H | -3.43470700 | 2.78600700  | 3.59072500  |
| C | -5.06310800 | -0.30159900 | -1.29327700 |
| C | -5.63380500 | 0.18073400  | -2.62408700 |
| H | -5.85678500 | -0.55859900 | -0.59876300 |
| H | -4.42619400 | -1.16960100 | -1.44274600 |
| H | -6.23514300 | -0.61715700 | -3.06773800 |
| H | -6.27563700 | 1.05257800  | -2.48458600 |
| H | -4.83673700 | 0.43537400  | -3.32519000 |
| S | -6.42929400 | 1.58744100  | 0.60629400  |
| S | 8.12438900  | -4.92413800 | -3.51607800 |

#### ADA 10

|    |             |             |             |
|----|-------------|-------------|-------------|
| H  | 2.01294900  | -0.91620300 | -3.40254900 |
| C  | 1.67123500  | -0.09157300 | -2.79481500 |
| H  | 3.50018800  | 1.19297500  | -2.63837400 |
| C  | 2.46519300  | 1.02277700  | -2.38421700 |
| H  | -0.43962300 | -0.65527800 | -2.33900800 |
| C  | 0.37984300  | 0.03040800  | -2.22861000 |
| C  | 1.66658700  | 1.84088400  | -1.55351700 |
| C  | 0.34416800  | 1.24960300  | -1.45529200 |
| H  | 1.97338200  | 2.75524400  | -1.06761900 |
| Fe | 1.79735500  | -0.03150300 | -0.70342100 |
| H  | 4.46412800  | -0.20480600 | 0.22296700  |
| C  | 2.82846300  | -1.71067100 | -0.04411200 |
| C  | 3.45869300  | -0.50858300 | 0.44864800  |
| C  | 1.46845400  | -1.70403500 | 0.46587600  |
| C  | 2.52005600  | 0.18711700  | 1.24841600  |
| H  | 2.69096100  | 1.13358100  | 1.73876400  |
| C  | 1.29756400  | -0.55271500 | 1.26486800  |
| H  | 0.38702100  | -0.25883600 | 1.76501900  |
| C  | -0.64464500 | 1.86414900  | -0.61016300 |
| H  | -0.23275800 | 2.69212800  | -0.03841800 |
| C  | 3.24439700  | -2.75220800 | -0.94491100 |
| H  | 2.41776700  | -3.40006600 | -1.22586200 |
| H  | 0.72627600  | -2.46203400 | 0.26463300  |
| C  | 4.42039800  | -3.15711700 | -1.51638700 |
| C  | 5.73351200  | -2.53720700 | -1.31004400 |
| C  | 4.31305900  | -4.34764400 | -2.39336300 |
| N  | 5.49264800  | -4.83312700 | -2.94965200 |
| N  | 6.82511500  | -3.15901000 | -1.92341900 |
| O  | 3.25569000  | -4.91188600 | -2.64487100 |
| O  | 5.92927000  | -1.53259100 | -0.63936100 |
| C  | 6.75745200  | -4.28422200 | -2.74234200 |
| O  | 7.75334400  | -4.76402900 | -3.25546200 |
| C  | -1.98038500 | 1.69614700  | -0.36453200 |
| C  | -2.56019600 | 2.64267400  | 0.61821100  |

|   |             |             |             |
|---|-------------|-------------|-------------|
| C | -2.85162400 | 0.70204500  | -1.00004500 |
| N | -3.92953600 | 2.55580200  | 0.84934100  |
| O | -1.90276900 | 3.48185400  | 1.22095500  |
| N | -4.20817900 | 0.75074600  | -0.66603000 |
| O | -2.47111600 | -0.14721700 | -1.79440300 |
| C | -4.78536900 | 1.64079600  | 0.23721600  |
| O | -5.97865300 | 1.61964700  | 0.48387400  |
| C | -4.50032300 | 3.50440700  | 1.81901400  |
| H | -4.03833500 | 3.35458800  | 2.79458000  |
| H | -4.30726000 | 4.52475400  | 1.48935000  |
| H | -5.56785400 | 3.32578100  | 1.87941200  |
| C | -5.08114100 | -0.23583700 | -1.32218600 |
| H | -5.02255200 | -0.11445900 | -2.40337900 |
| H | -4.75812700 | -1.24368000 | -1.06211700 |
| H | -6.09652700 | -0.06928400 | -0.98110000 |
| C | 8.14388300  | -2.54794000 | -1.69213800 |
| H | 8.15889500  | -1.53598100 | -2.09708500 |
| H | 8.34195700  | -2.50283200 | -0.62197400 |
| H | 8.89112000  | -3.15802600 | -2.18662200 |
| C | 5.37887300  | -6.01637700 | -3.81732300 |
| H | 4.96745000  | -6.85019700 | -3.24897600 |
| H | 4.71401400  | -5.79507900 | -4.65165500 |
| H | 6.36879800  | -6.26517200 | -4.18247000 |

#### ADA 11

|    |             |             |             |
|----|-------------|-------------|-------------|
| H  | 2.01294900  | -0.91620300 | -3.40254900 |
| C  | 1.67123500  | -0.09157300 | -2.79481500 |
| H  | 3.50018800  | 1.19297500  | -2.63837400 |
| C  | 2.46519300  | 1.02277700  | -2.38421700 |
| H  | -0.43962300 | -0.65527800 | -2.33900800 |
| C  | 0.37984300  | 0.03040800  | -2.22861000 |
| C  | 1.66658700  | 1.84088400  | -1.55351700 |
| C  | 0.34416800  | 1.24960300  | -1.45529200 |
| H  | 1.97338200  | 2.75524400  | -1.06761900 |
| Fe | 1.79735500  | -0.03150300 | -0.70342100 |
| H  | 4.46412800  | -0.20480600 | 0.22296700  |
| C  | 2.82846300  | -1.71067100 | -0.04411200 |
| C  | 3.45869300  | -0.50858300 | 0.44864800  |
| C  | 1.46845400  | -1.70403500 | 0.46587600  |
| C  | 2.52005600  | 0.18711700  | 1.24841600  |
| H  | 2.69096100  | 1.13358100  | 1.73876400  |
| C  | 1.29756400  | -0.55271500 | 1.26486800  |
| H  | 0.38702100  | -0.25883600 | 1.76501900  |
| C  | -0.64464500 | 1.86414900  | -0.61016300 |
| H  | -0.23275800 | 2.69212800  | -0.03841800 |
| C  | 3.24439700  | -2.75220800 | -0.94491100 |
| H  | 2.41776700  | -3.40006600 | -1.22586200 |
| H  | 0.72627600  | -2.46203400 | 0.26463300  |
| C  | 4.42039800  | -3.15711700 | -1.51638700 |
| C  | 5.73351200  | -2.53720700 | -1.31004400 |
| C  | 4.31305900  | -4.34764400 | -2.39336300 |

|   |             |             |             |
|---|-------------|-------------|-------------|
| N | 5.49264800  | -4.83312700 | -2.94965200 |
| N | 6.82511500  | -3.15901000 | -1.92341900 |
| O | 3.25569000  | -4.91188600 | -2.64487100 |
| O | 5.92927000  | -1.53259100 | -0.63936100 |
| C | 6.75745200  | -4.28422200 | -2.74234200 |
| O | 7.75334400  | -4.76402900 | -3.25546200 |
| C | -1.98038500 | 1.69614700  | -0.36453200 |
| C | -2.56019600 | 2.64267400  | 0.61821100  |
| C | -2.85162400 | 0.70204500  | -1.00004500 |
| N | -3.92953600 | 2.55580200  | 0.84934100  |
| O | -1.90276900 | 3.48185400  | 1.22095500  |
| N | -4.20817900 | 0.75074600  | -0.66603000 |
| O | -2.47111600 | -0.14721700 | -1.79440300 |
| C | -4.78536900 | 1.64079600  | 0.23721600  |
| O | -5.97865300 | 1.61964700  | 0.48387400  |
| C | -4.50032300 | 3.50440700  | 1.81901400  |
| H | -4.03833500 | 3.35458800  | 2.79458000  |
| H | -4.30726000 | 4.52475400  | 1.48935000  |
| H | -5.56785400 | 3.32578100  | 1.87941200  |
| C | -5.08114100 | -0.23583700 | -1.32218600 |
| H | -5.02255200 | -0.11445900 | -2.40337900 |
| H | -4.75812700 | -1.24368000 | -1.06211700 |
| H | -6.09652700 | -0.06928400 | -0.98110000 |
| C | 8.14388300  | -2.54794000 | -1.69213800 |
| H | 8.15889500  | -1.53598100 | -2.09708500 |
| H | 8.34195700  | -2.50283200 | -0.62197400 |
| H | 8.89112000  | -3.15802600 | -2.18662200 |
| C | 5.37887300  | -6.01637700 | -3.81732300 |
| H | 4.96745000  | -6.85019700 | -3.24897600 |
| H | 4.71401400  | -5.79507900 | -4.65165500 |
| H | 6.36879800  | -6.26517200 | -4.18247000 |

Modification of the UV-visible absorption spectra of DA0-DA11 and ADA0-ADA11 in DMSO at room temperature over time

DA0

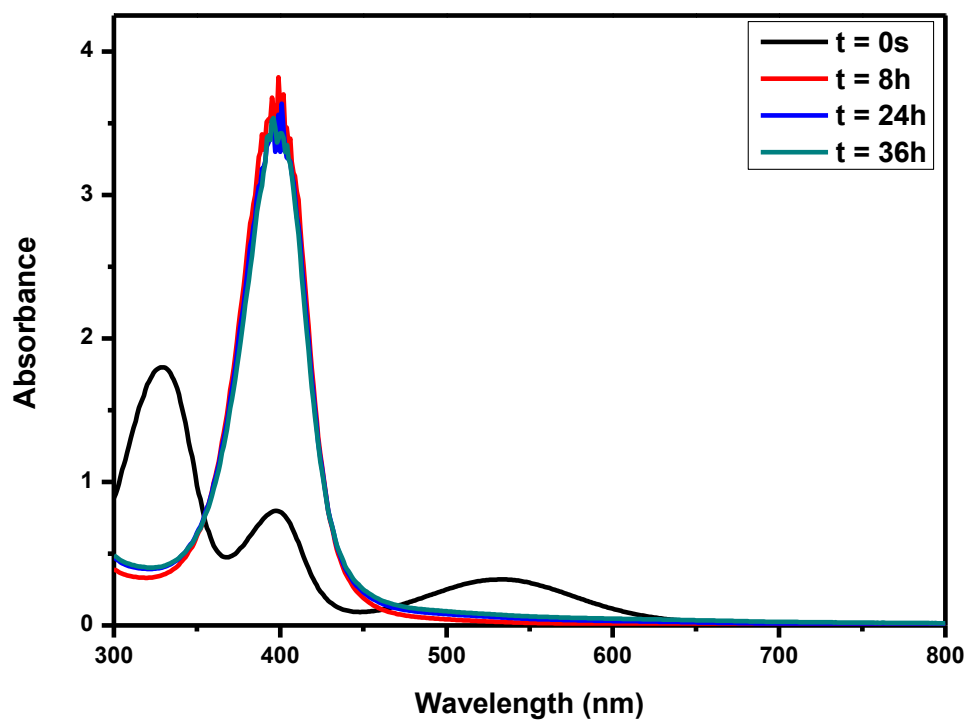

DA1

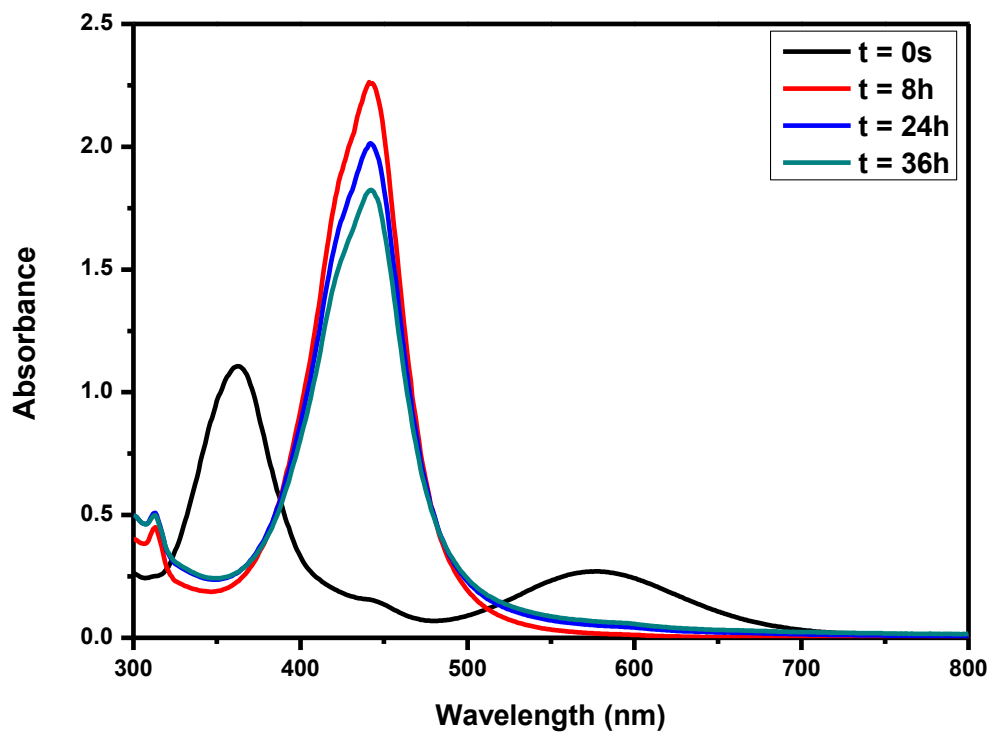

DA2

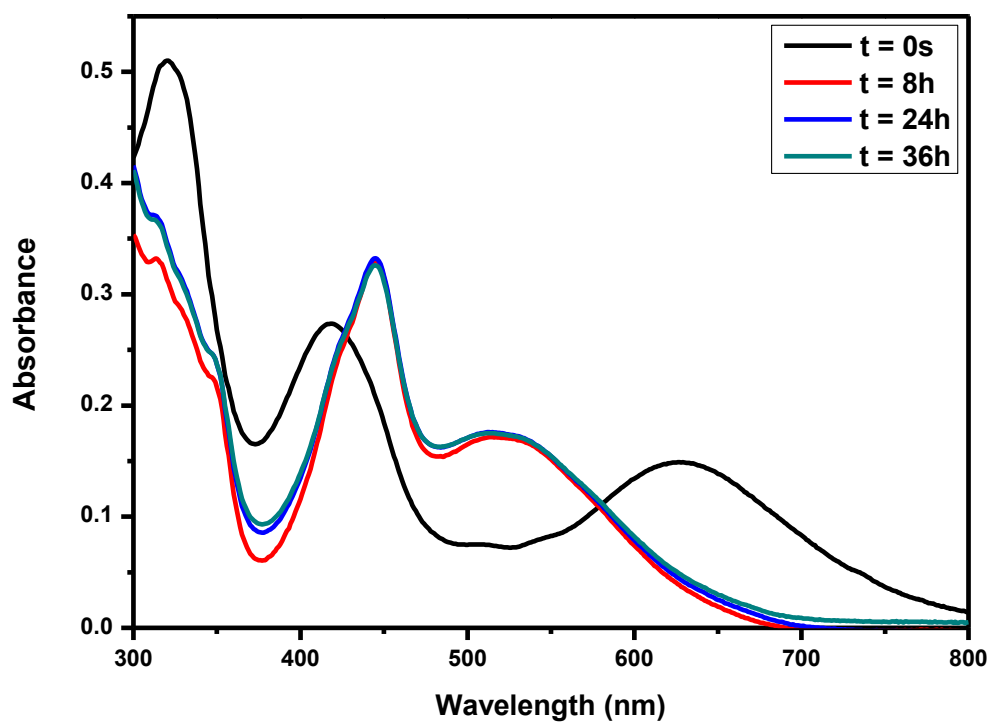

DA3

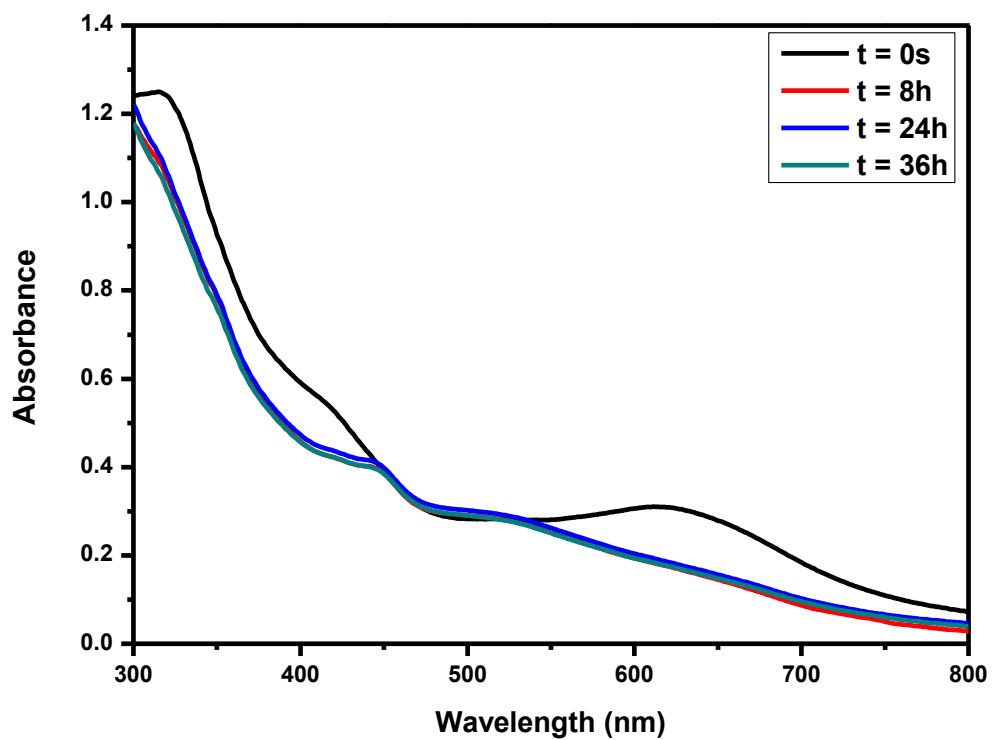

DA4

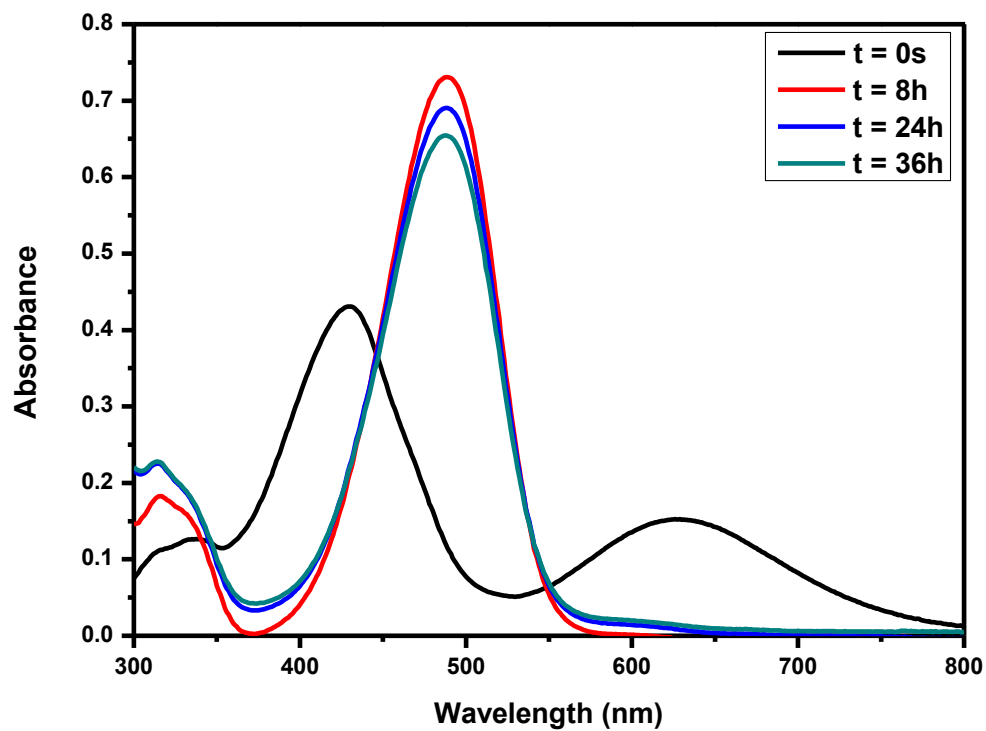

DA5

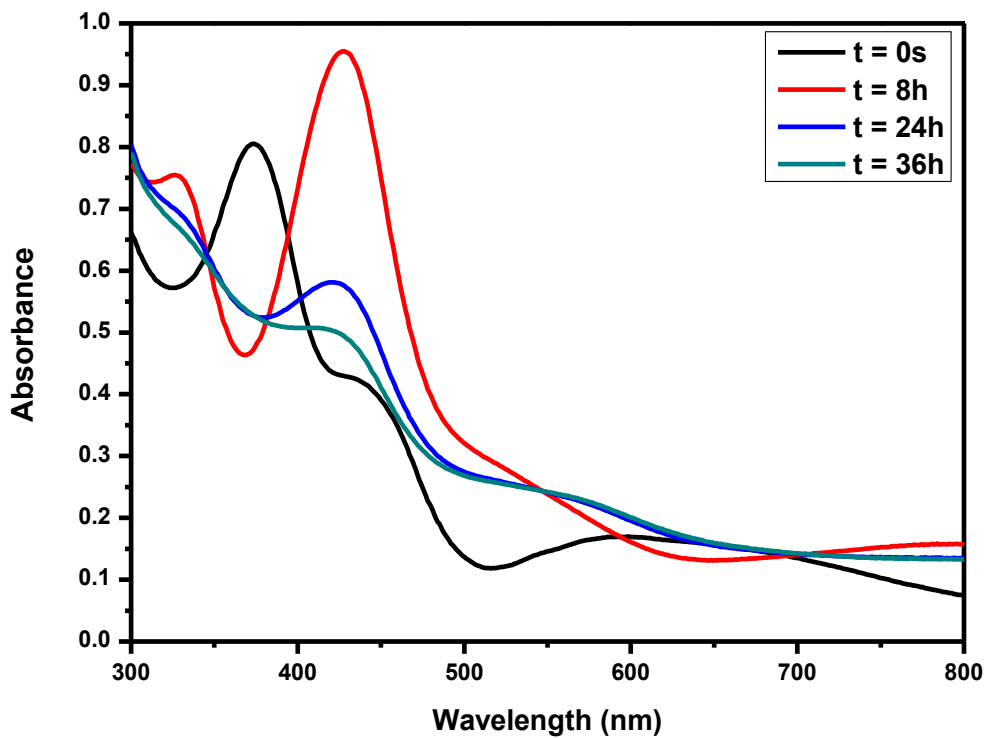

DA6

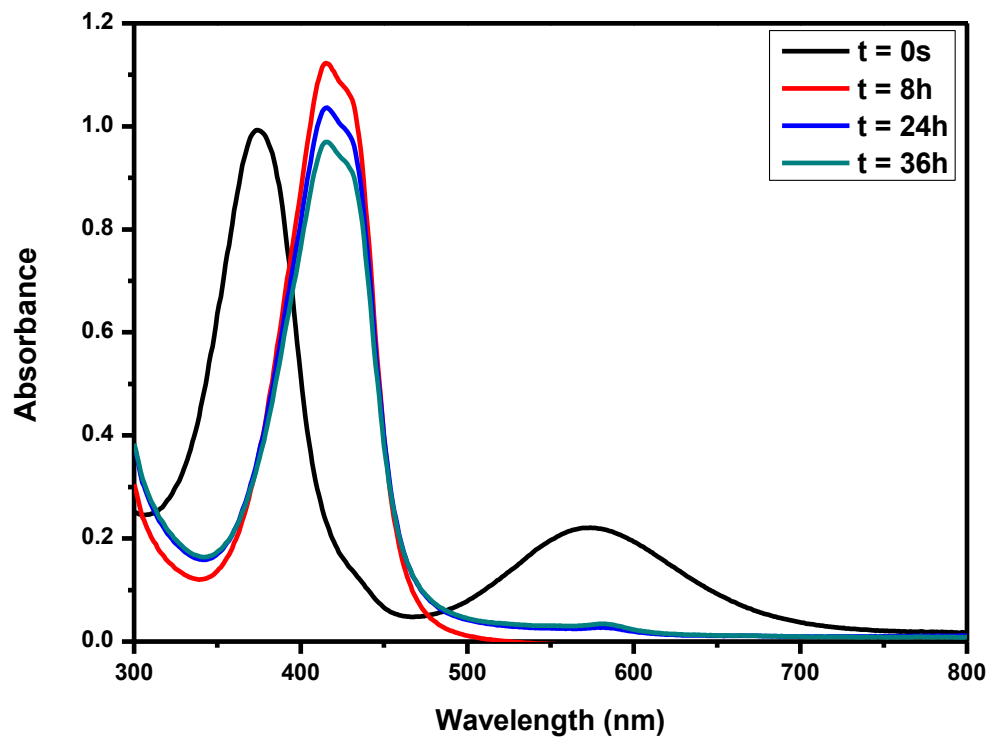

DA7

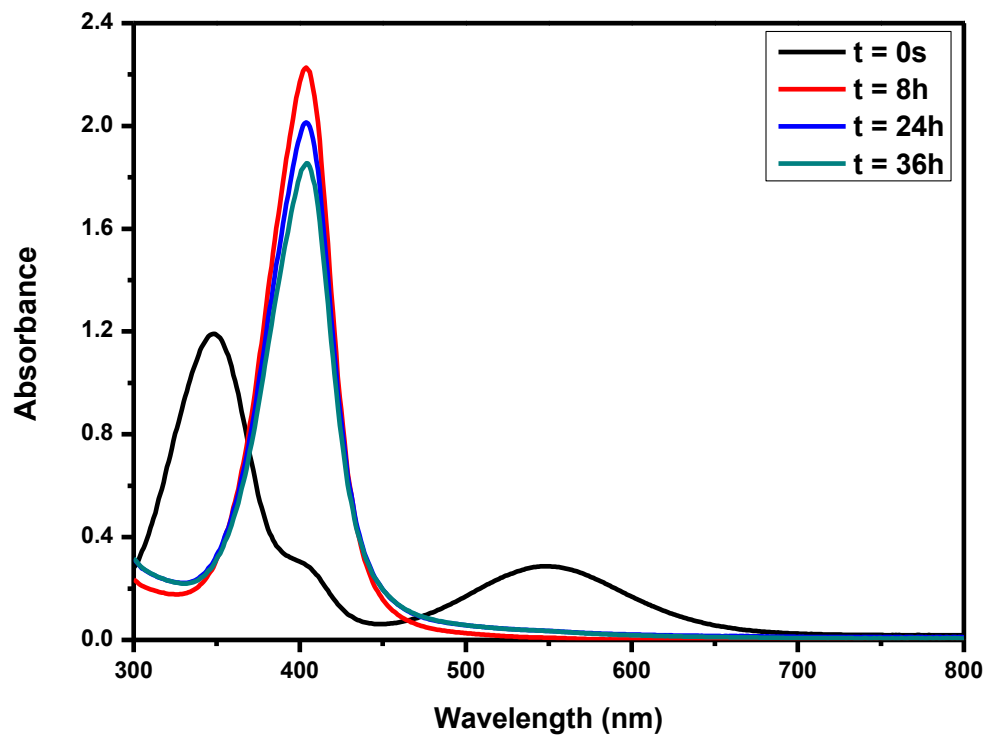



DA8

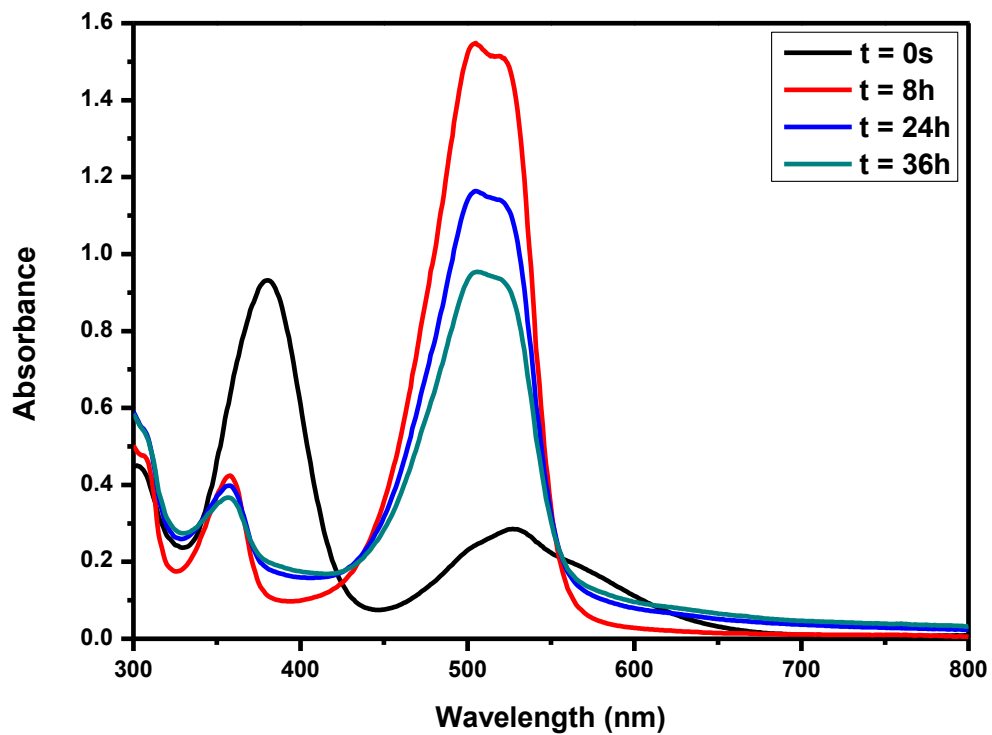

DA9

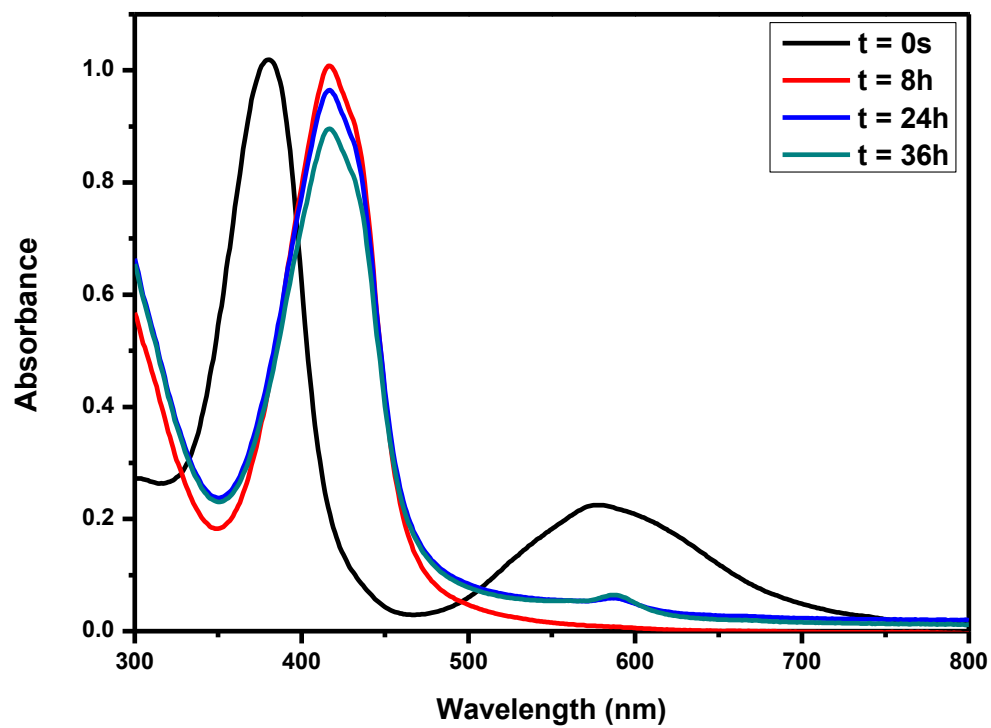

DA10

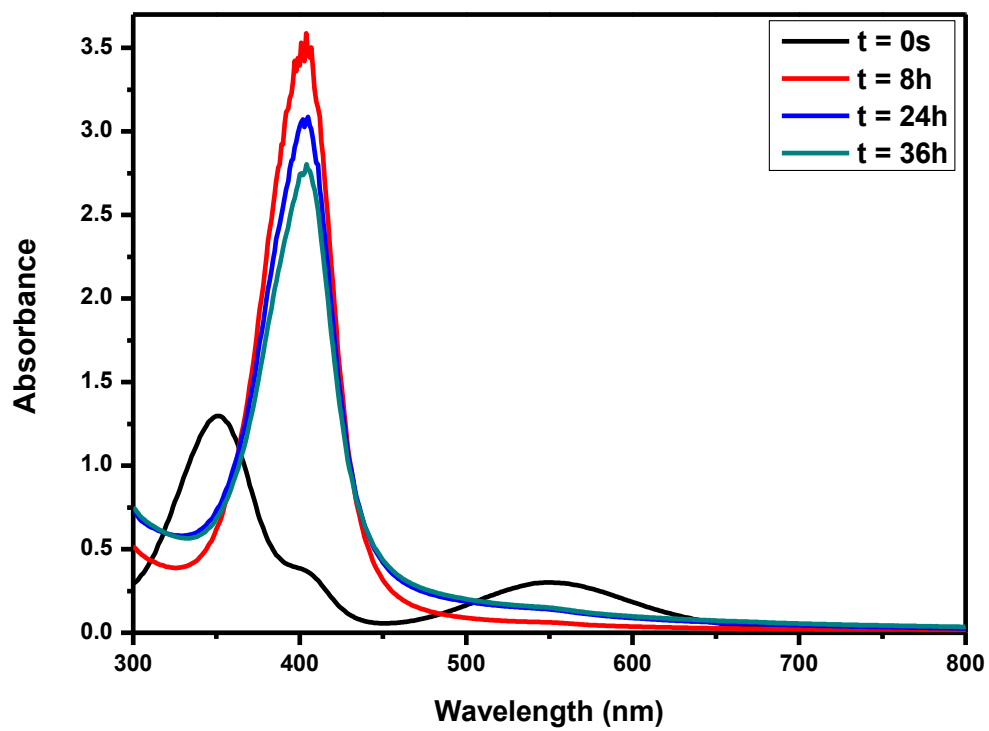

DA11

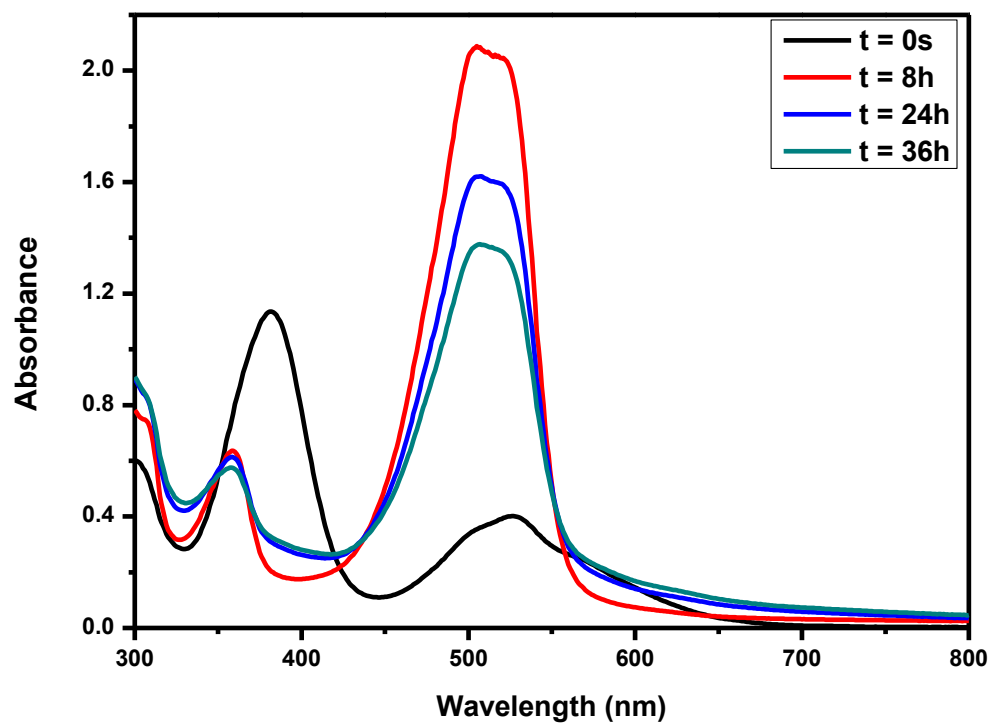

ADA0

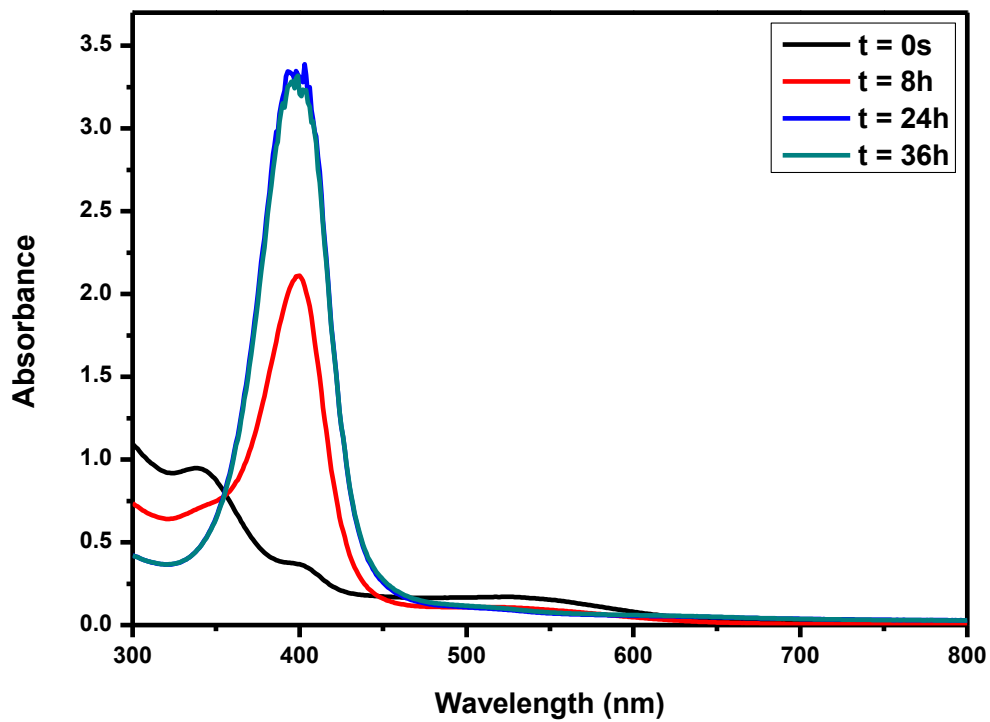

ADA1

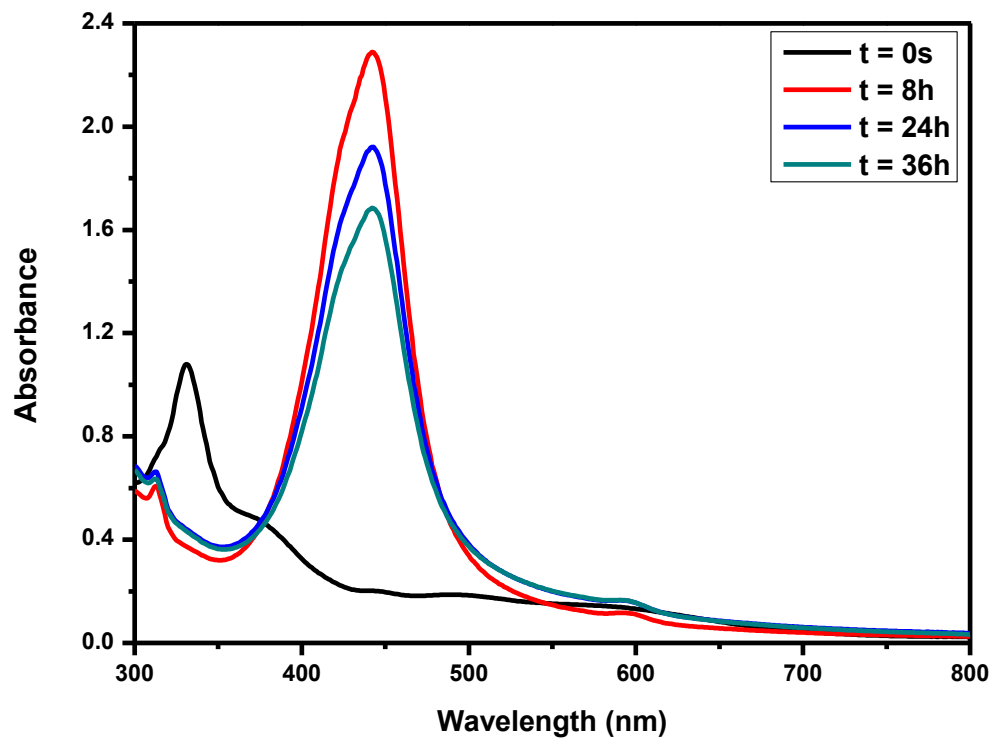

ADA2

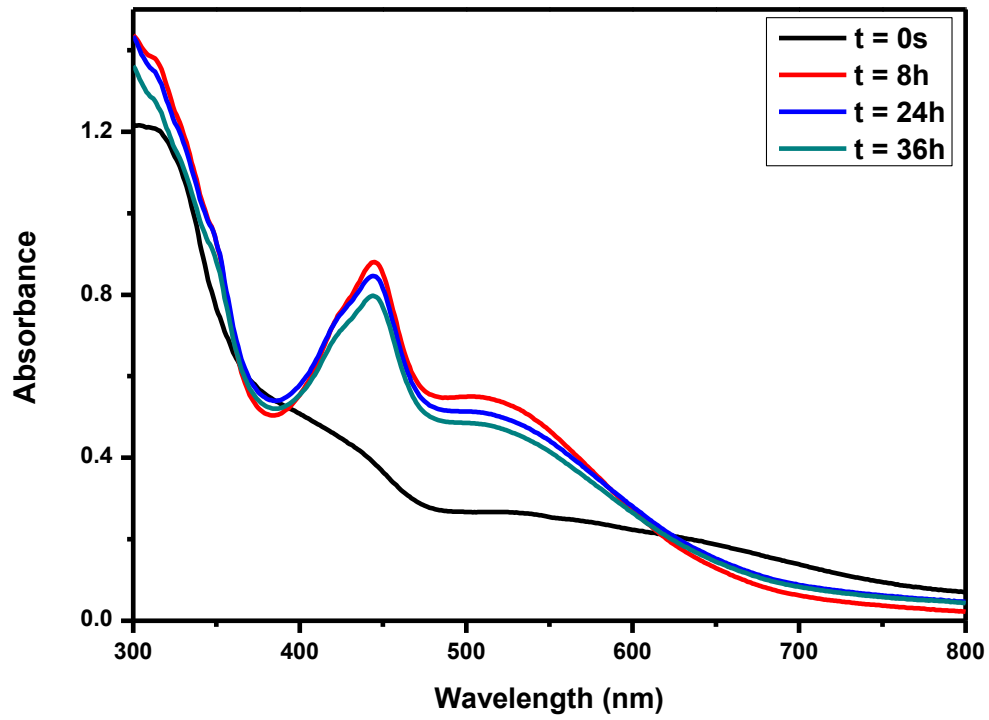

ADA3

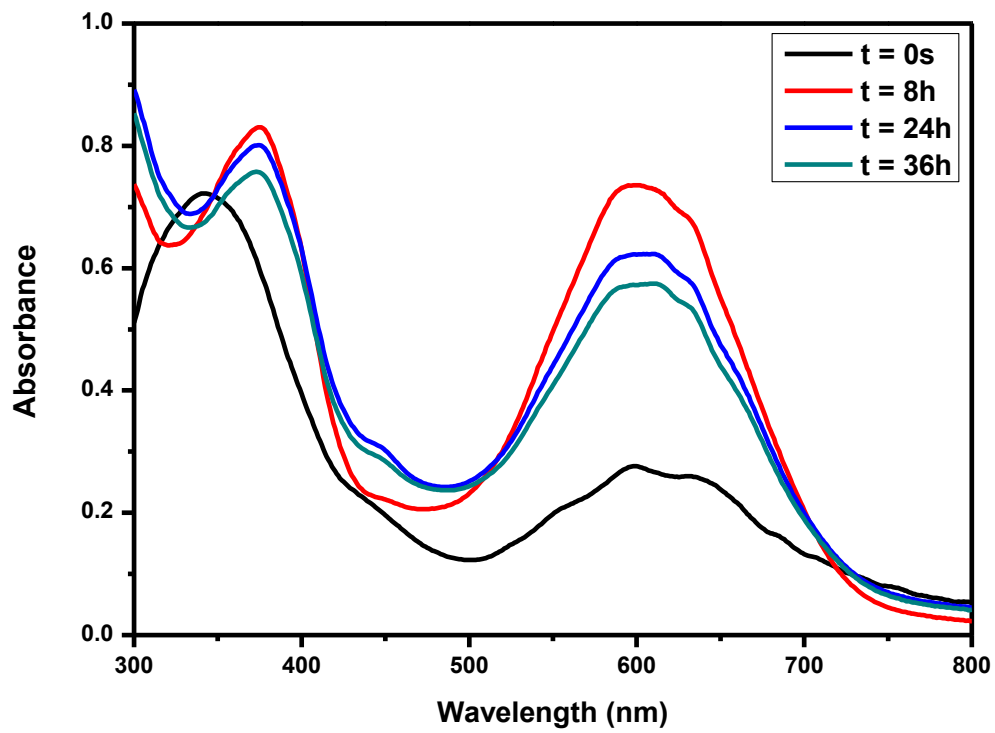

ADA4

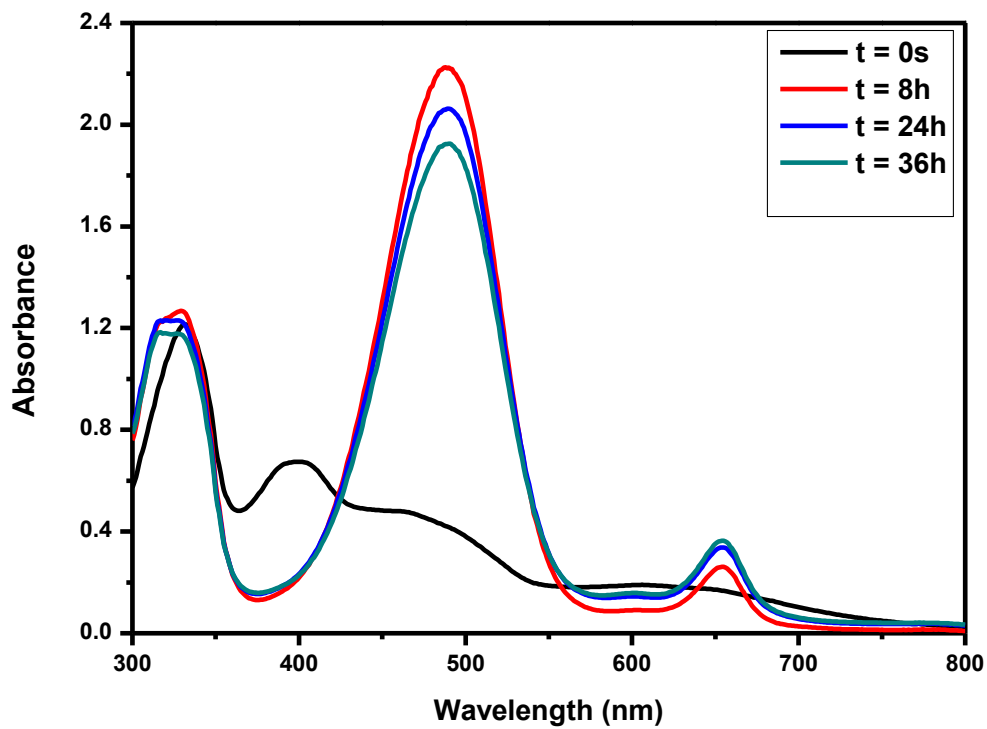

ADA5

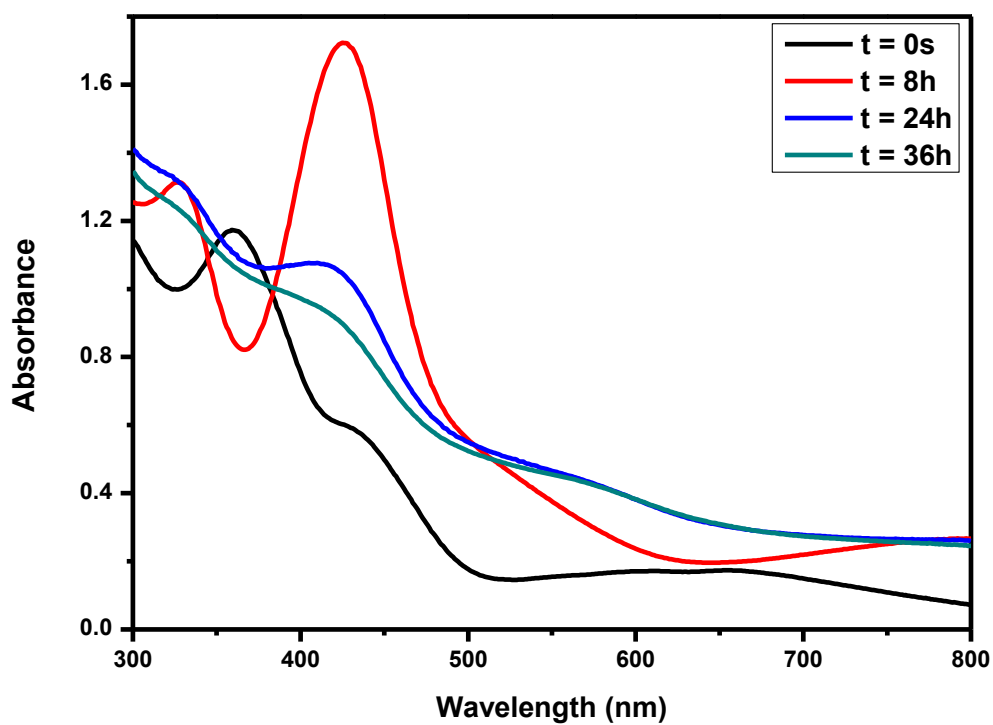

ADA6

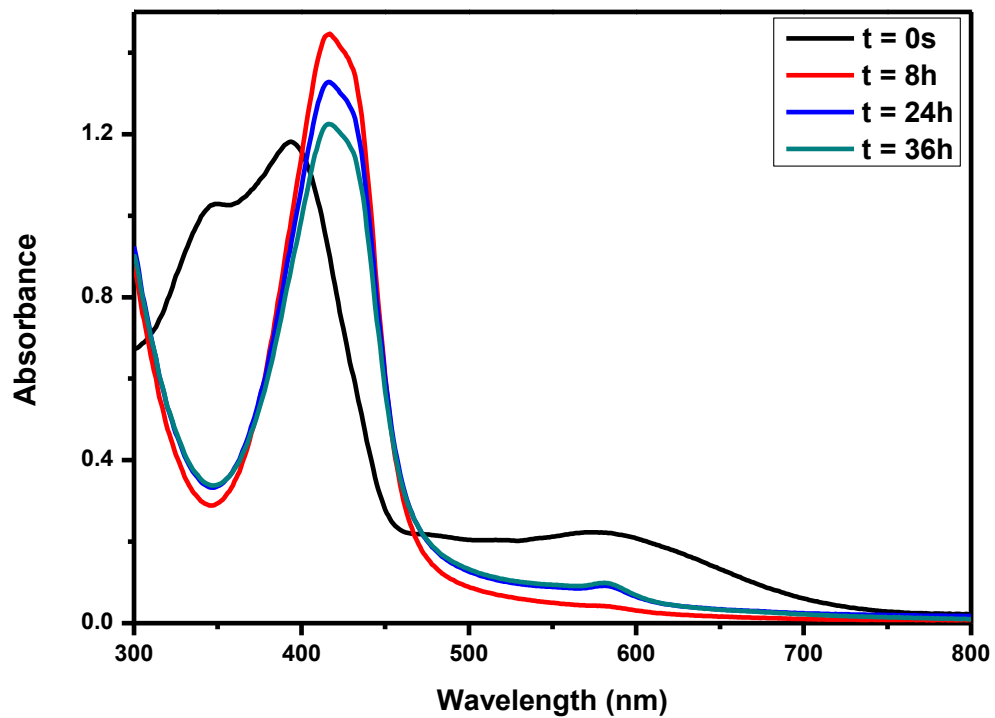

ADA7

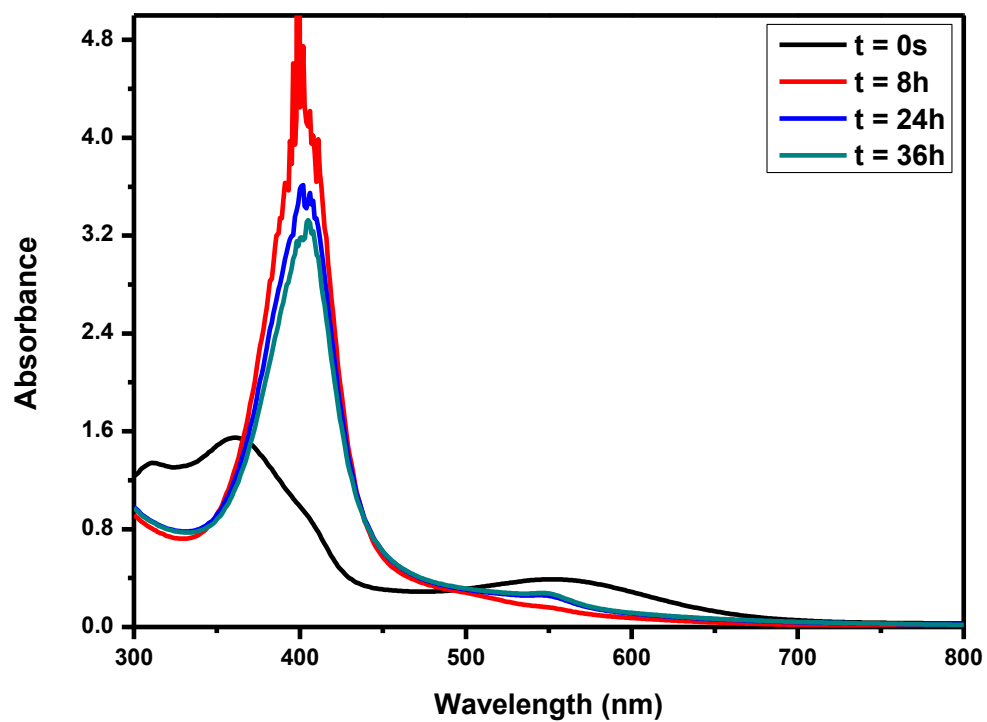

ADA8

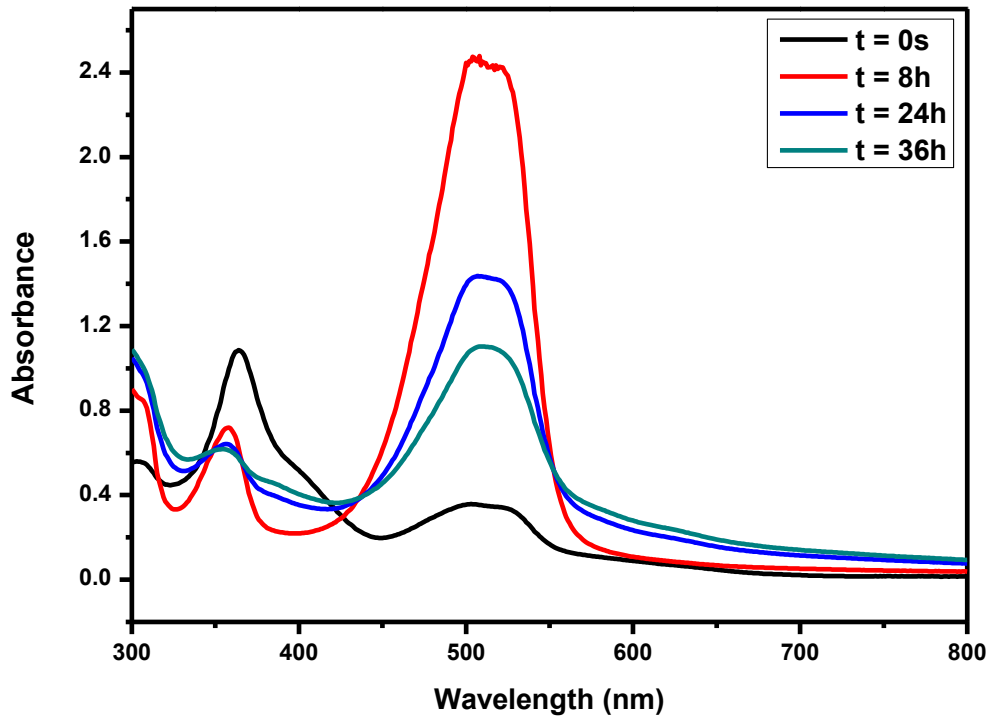

ADA9

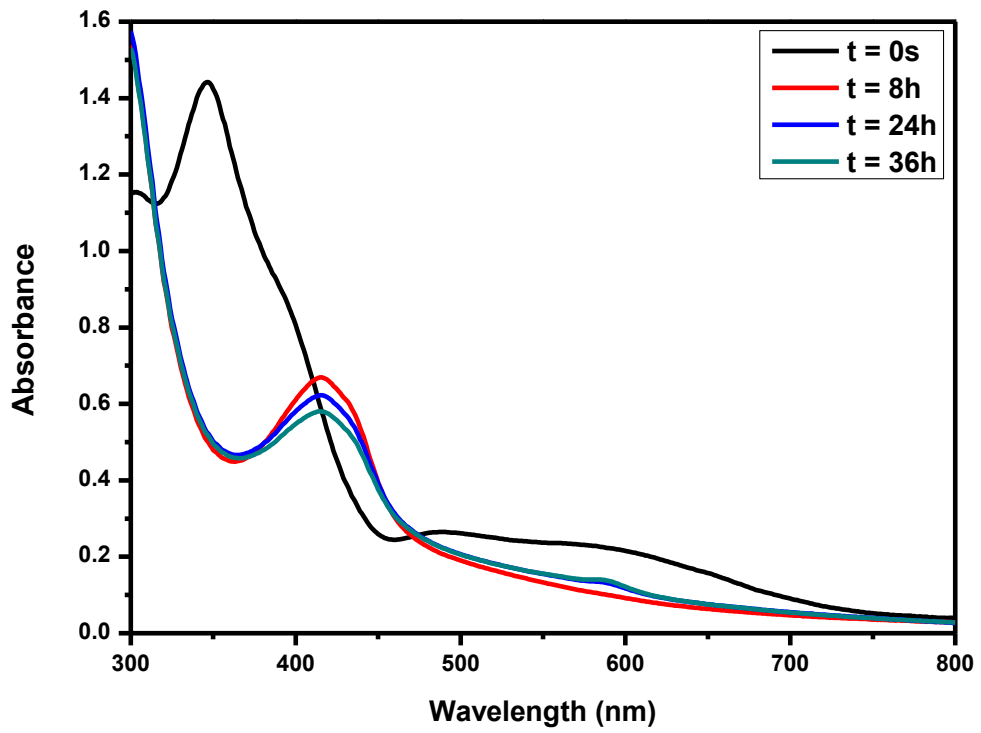

ADA10

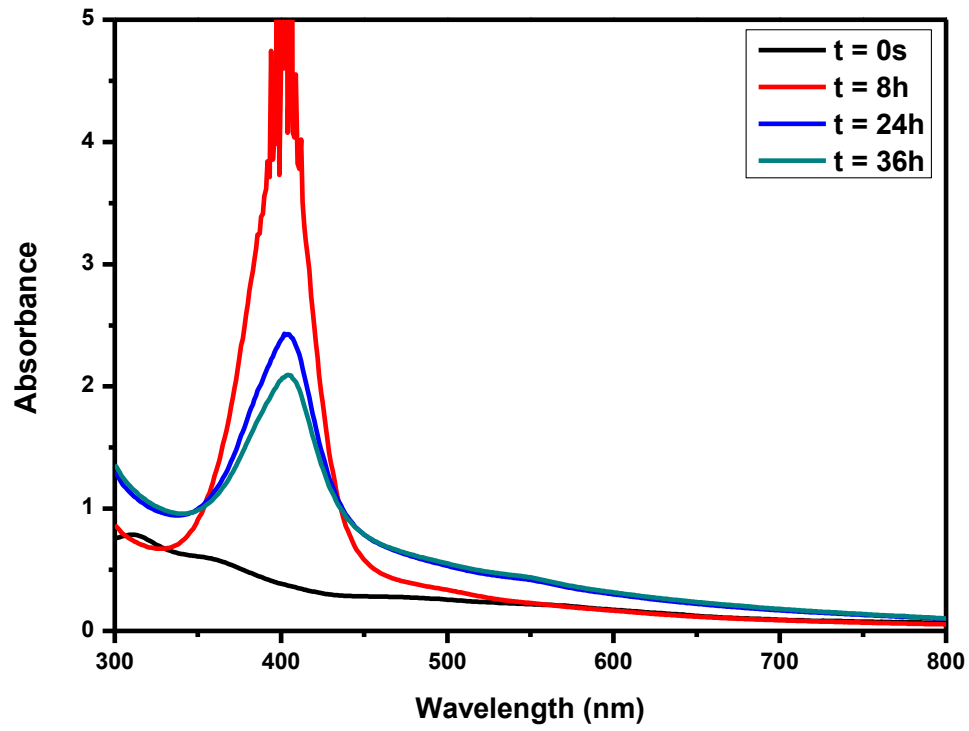

ADA11

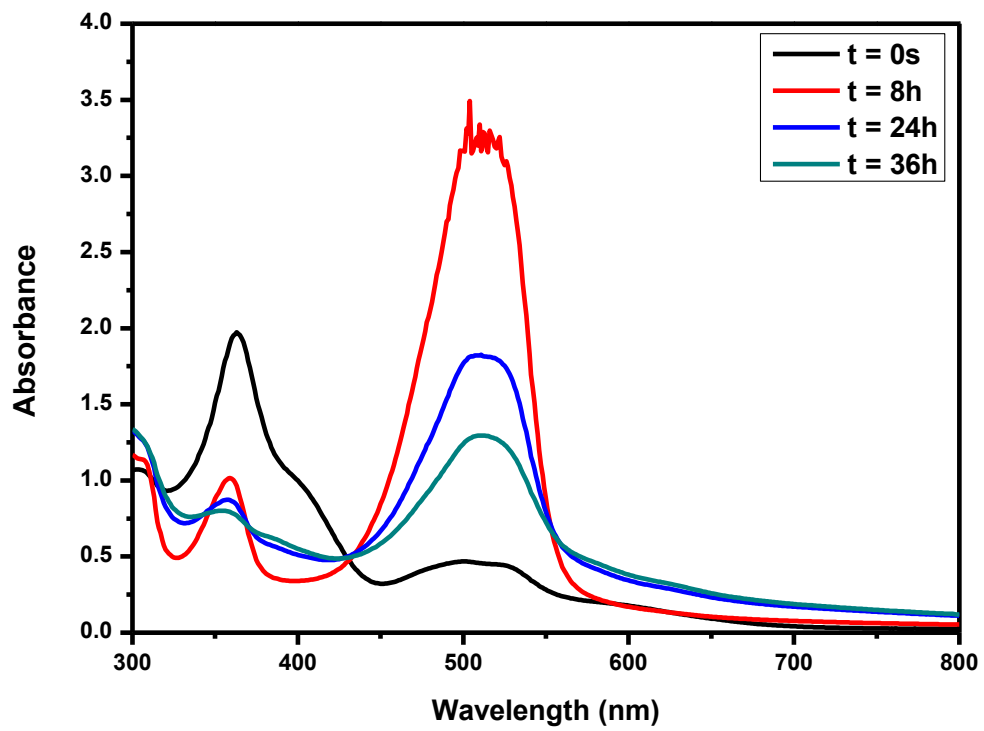



Modification of the UV-visible absorption spectra of A-D-A0 in different solvents at room temperature over time

Acetone

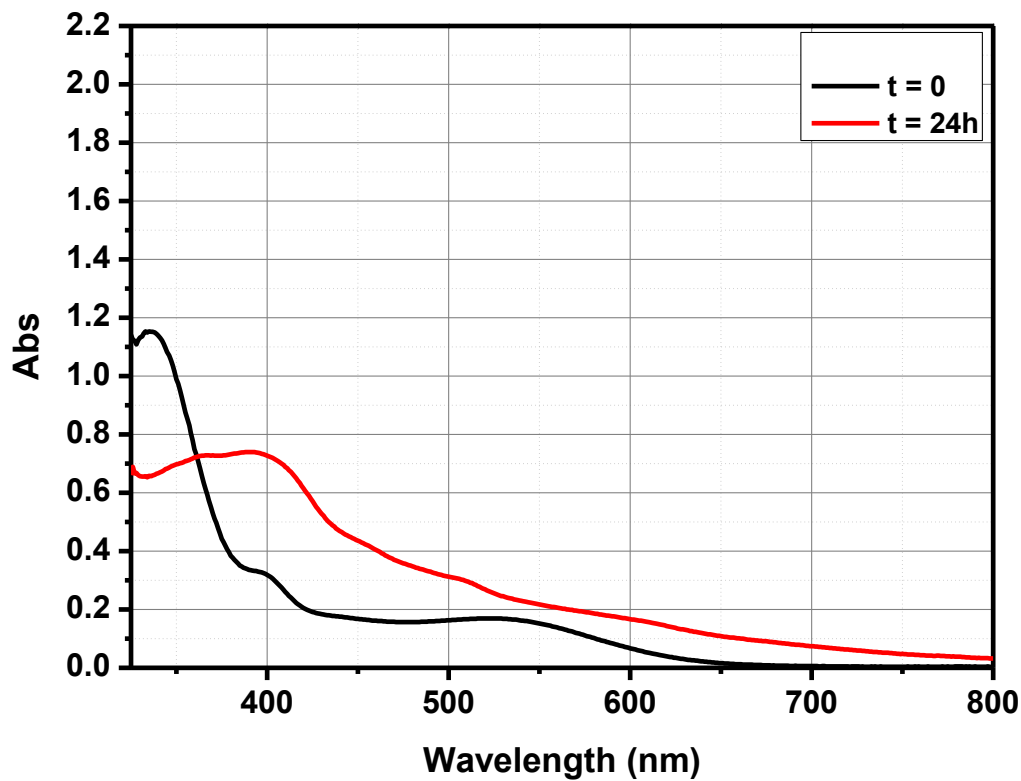

Acetonitrile

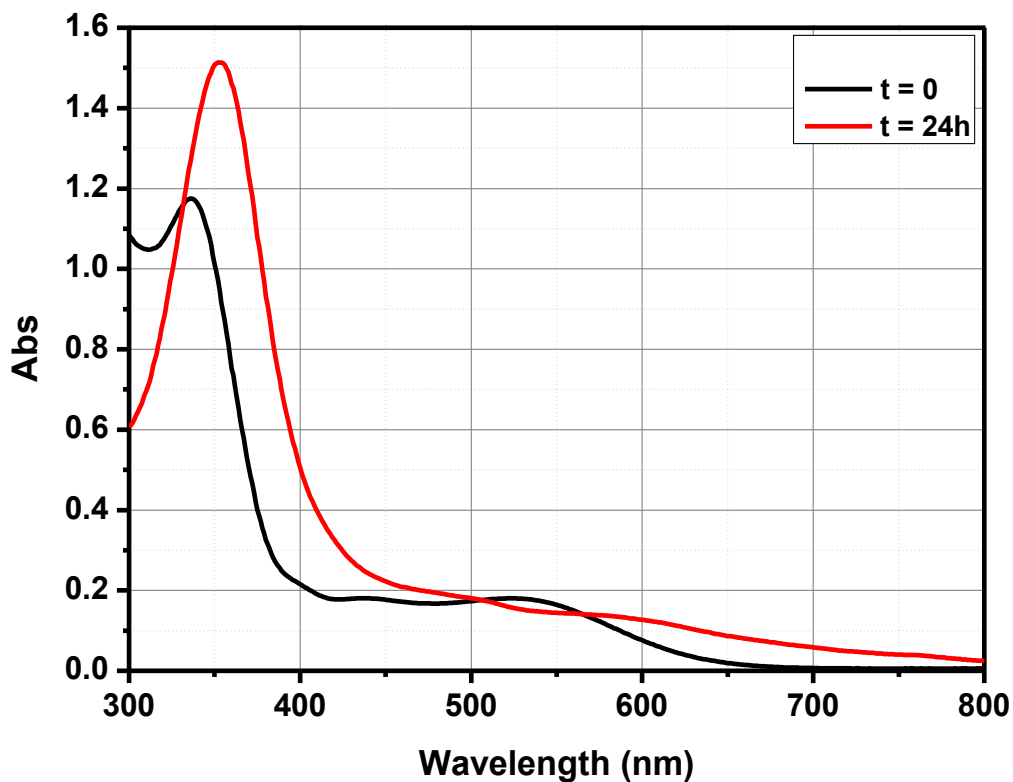

AcOEt

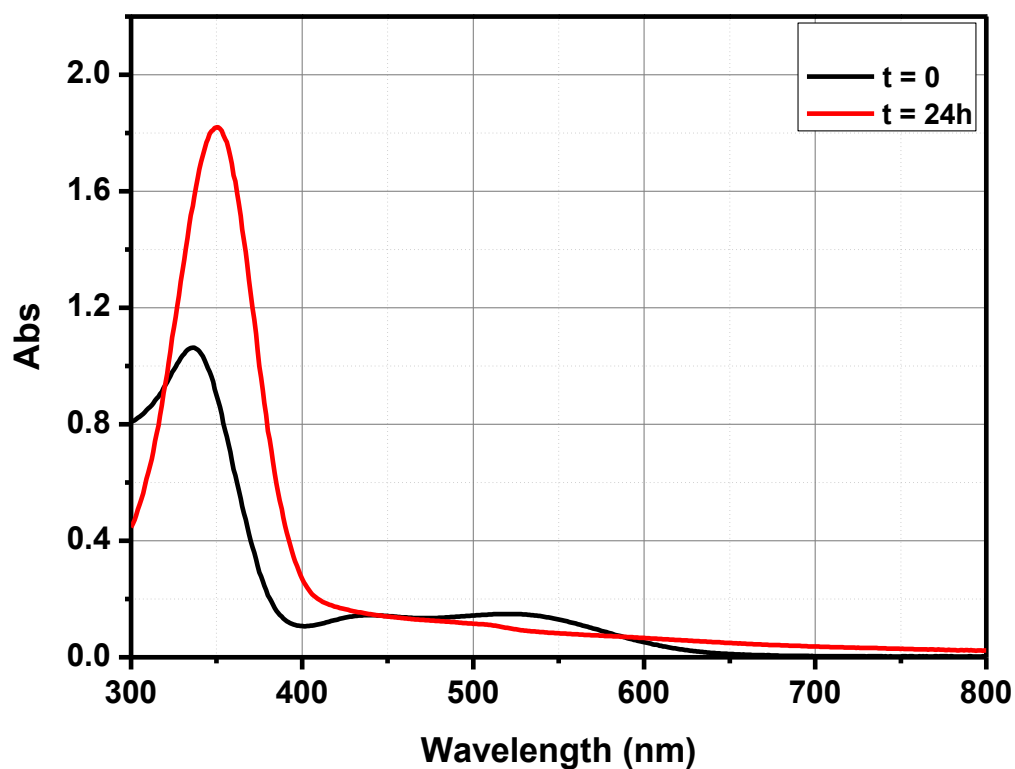

Anisole

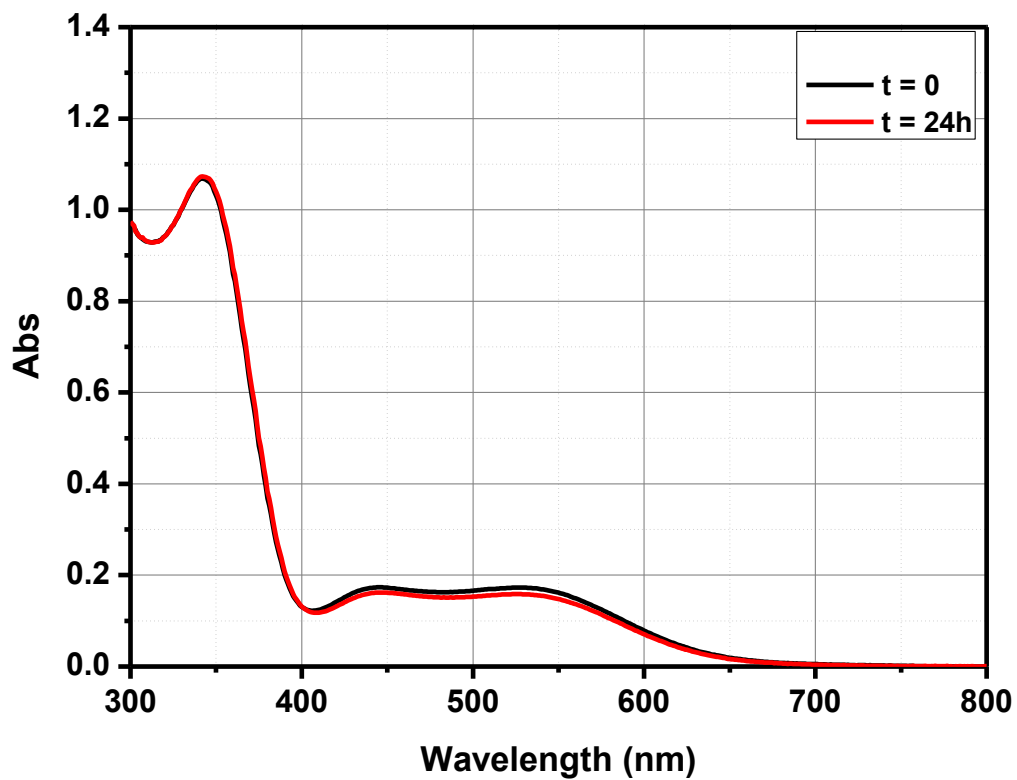

### Chloroforme

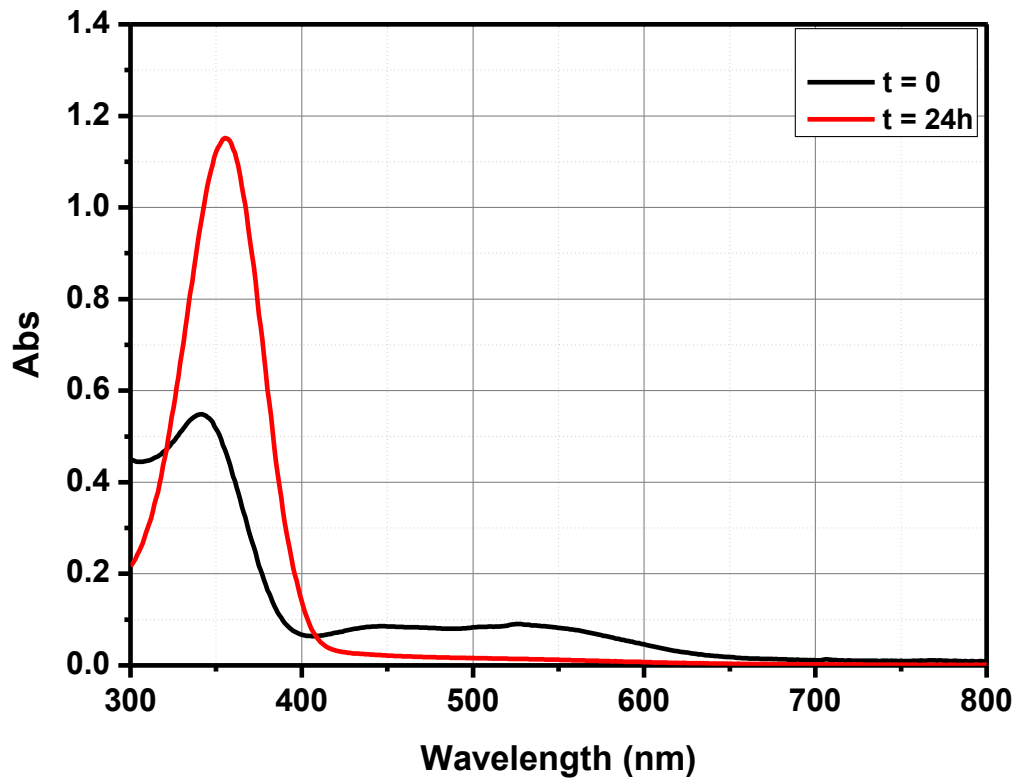

### 1,2-Dichloroethane

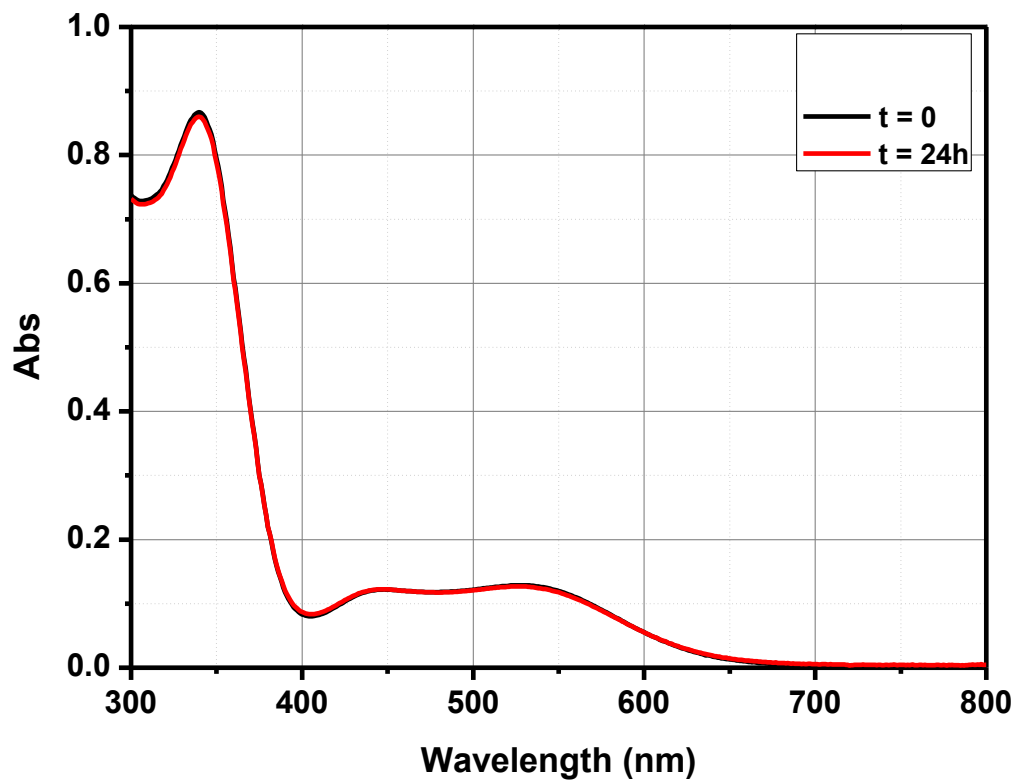

Dichloromethane

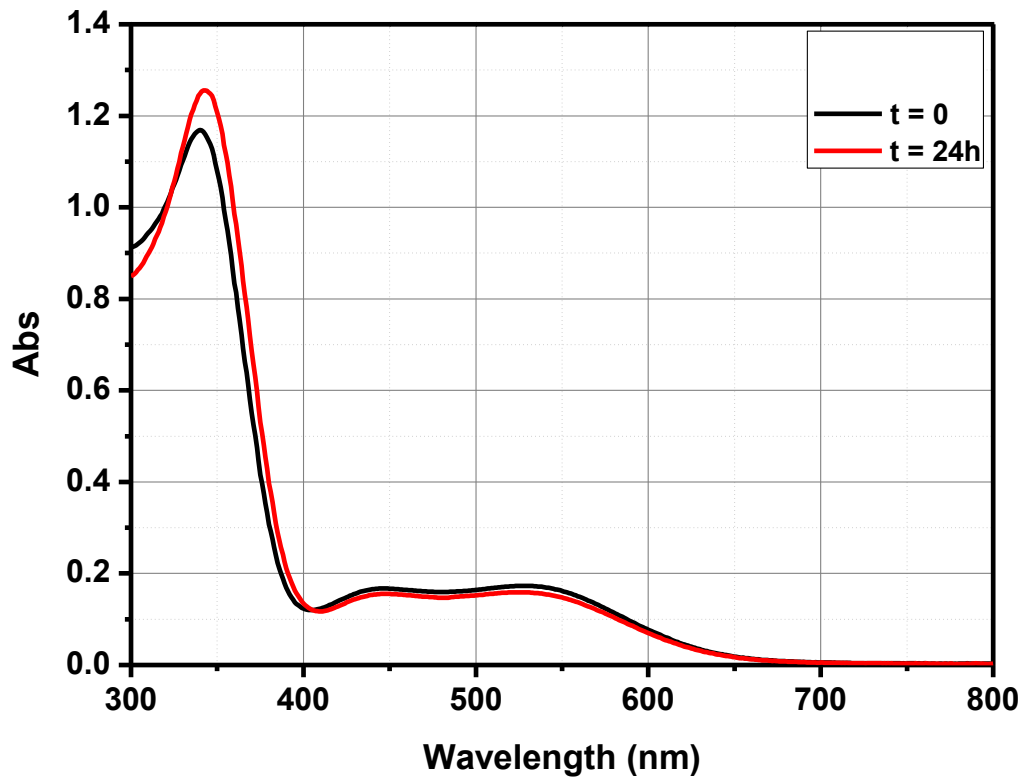

Diethyl carbonate

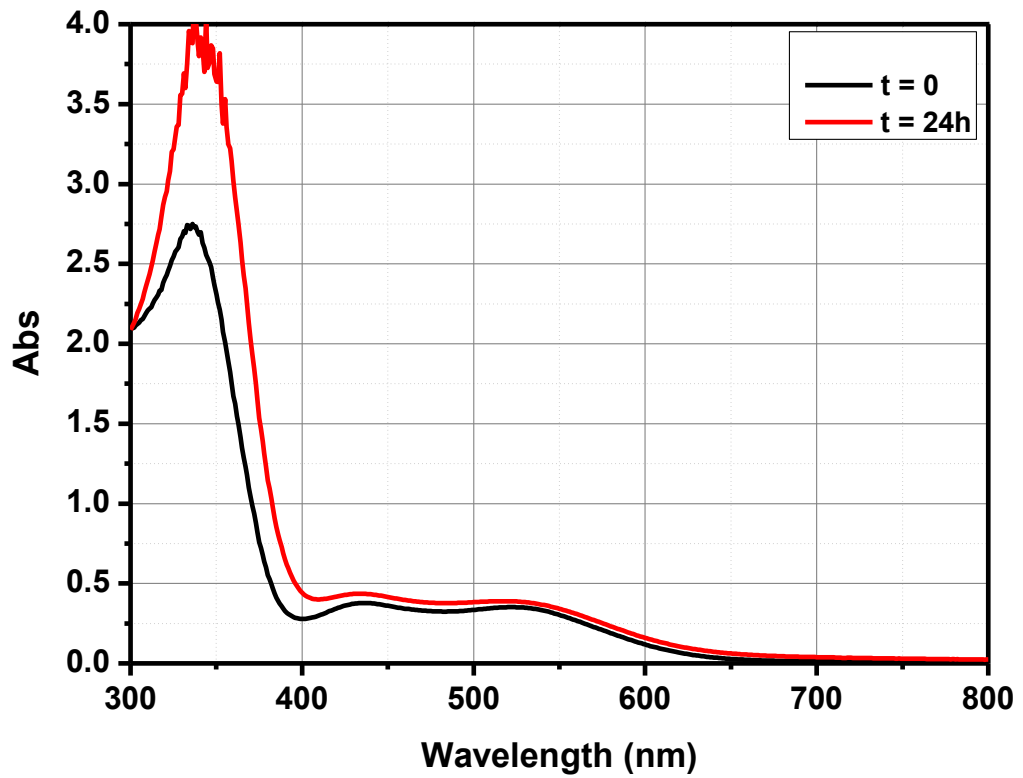

### Diglyme

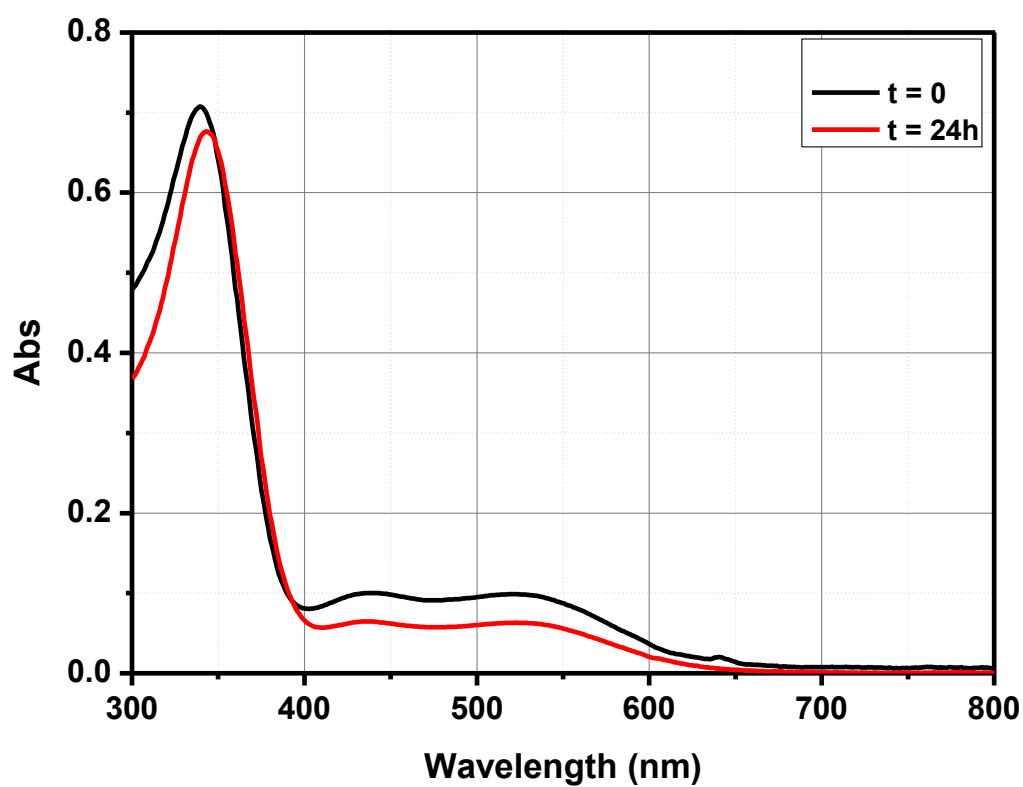

### Dioxane

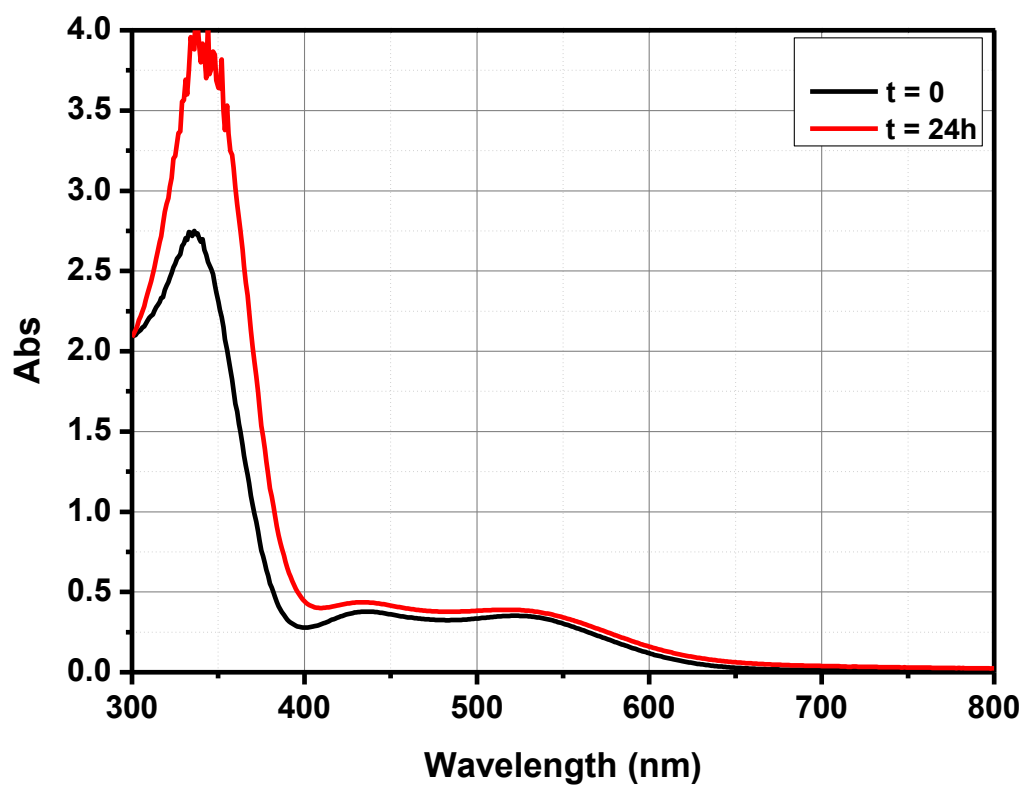

### Dimethylacetamide

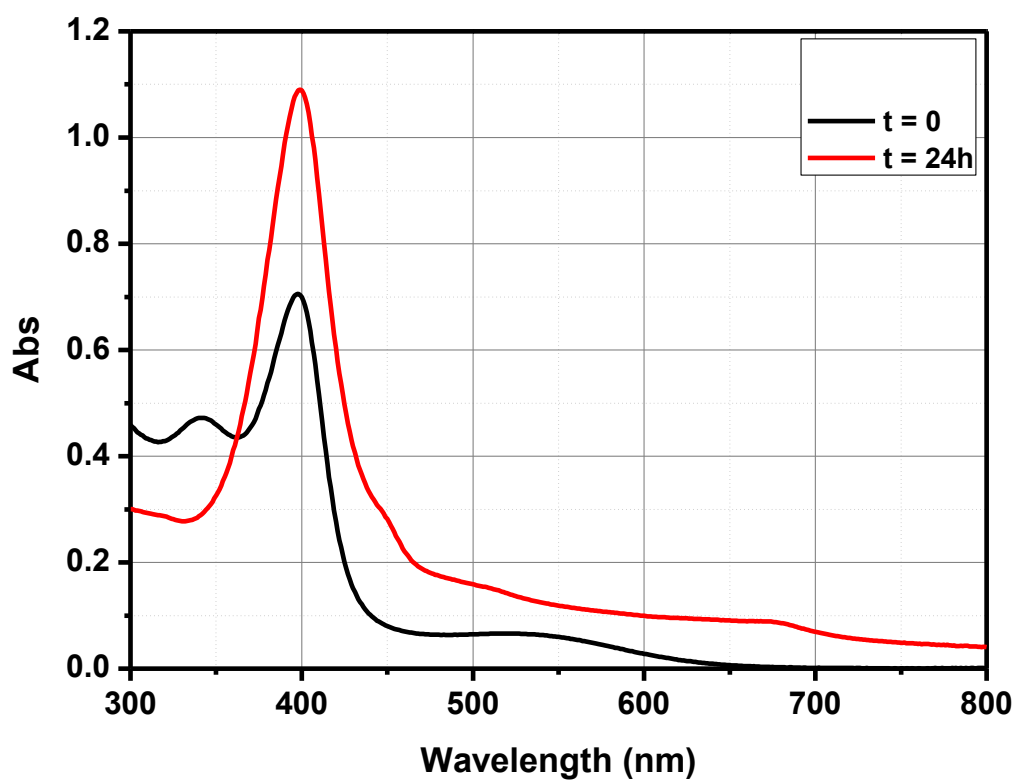

### DMF

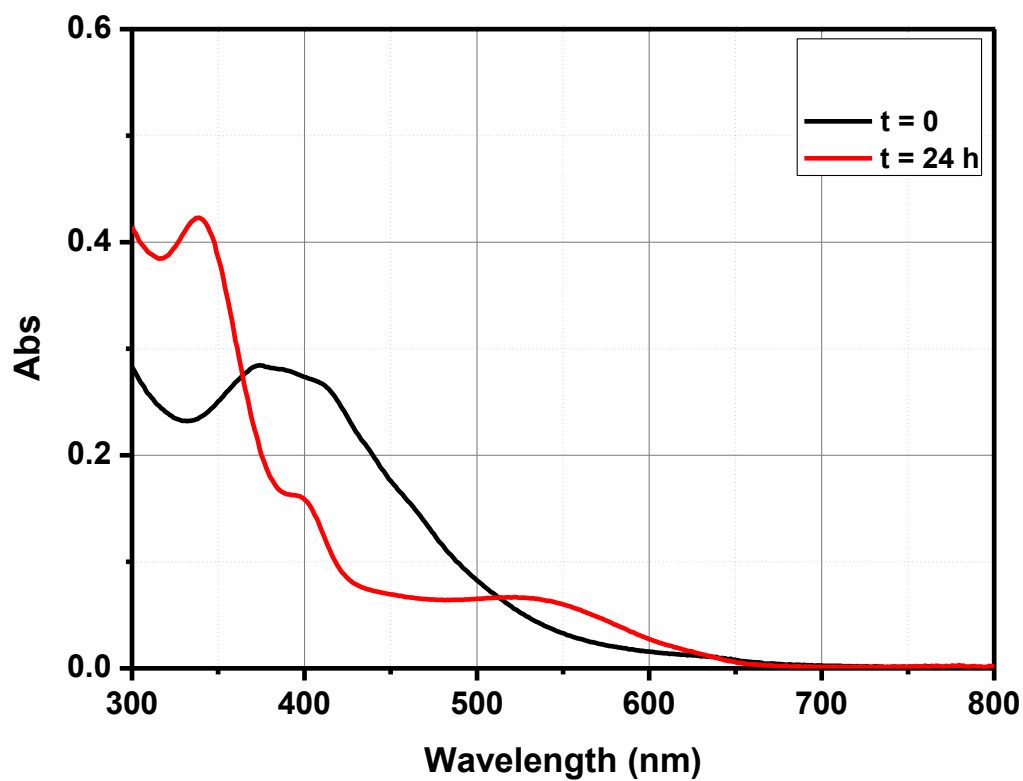

Diethyl ether

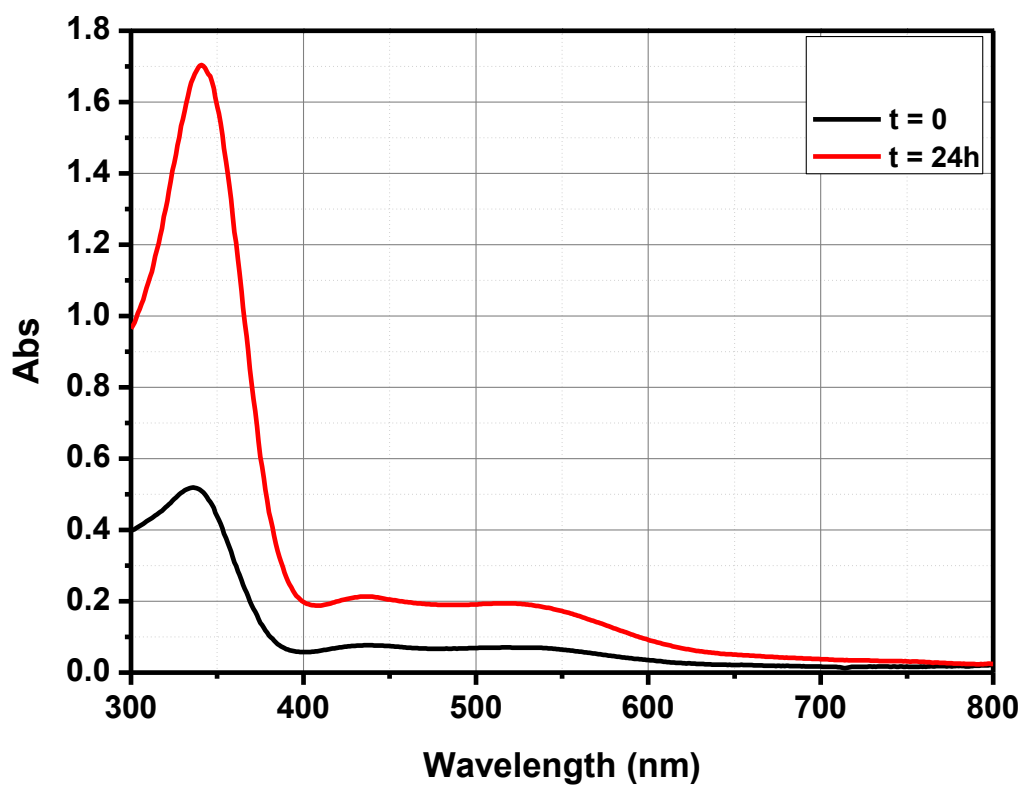

THF

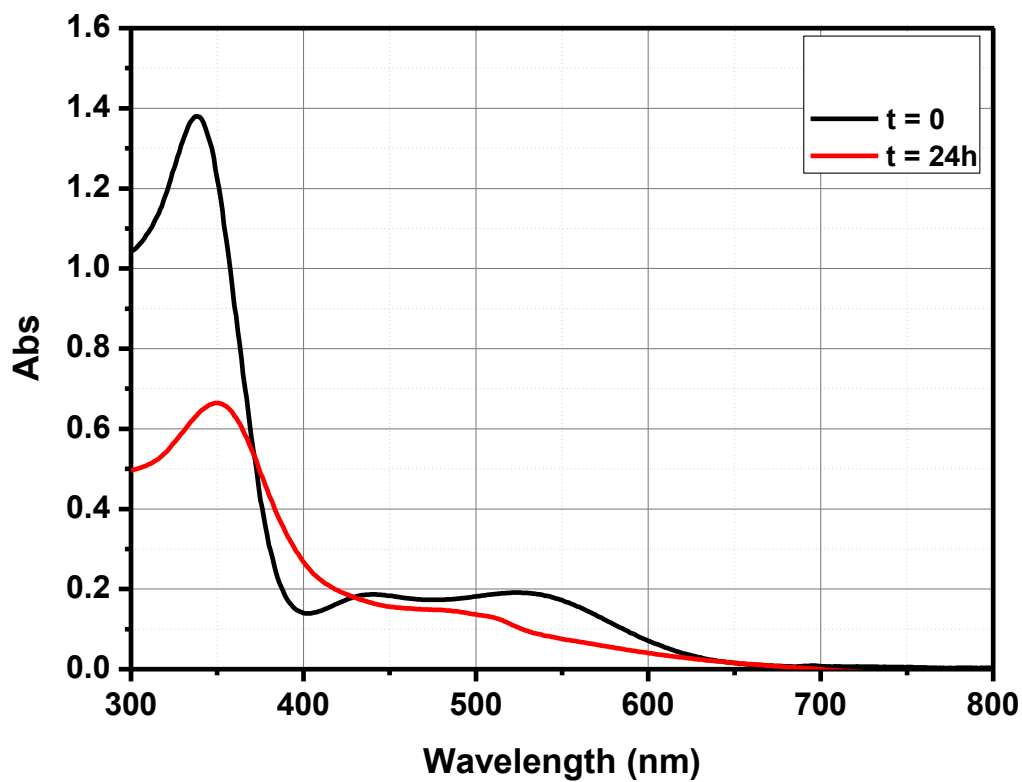

Toluene

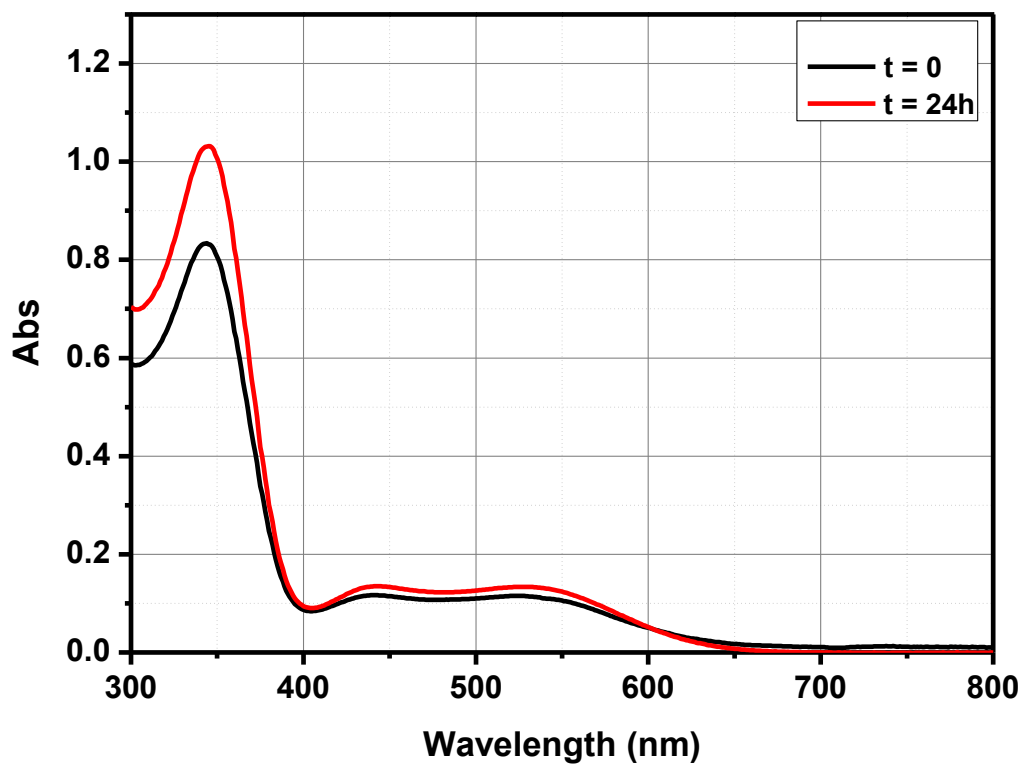

Xylene

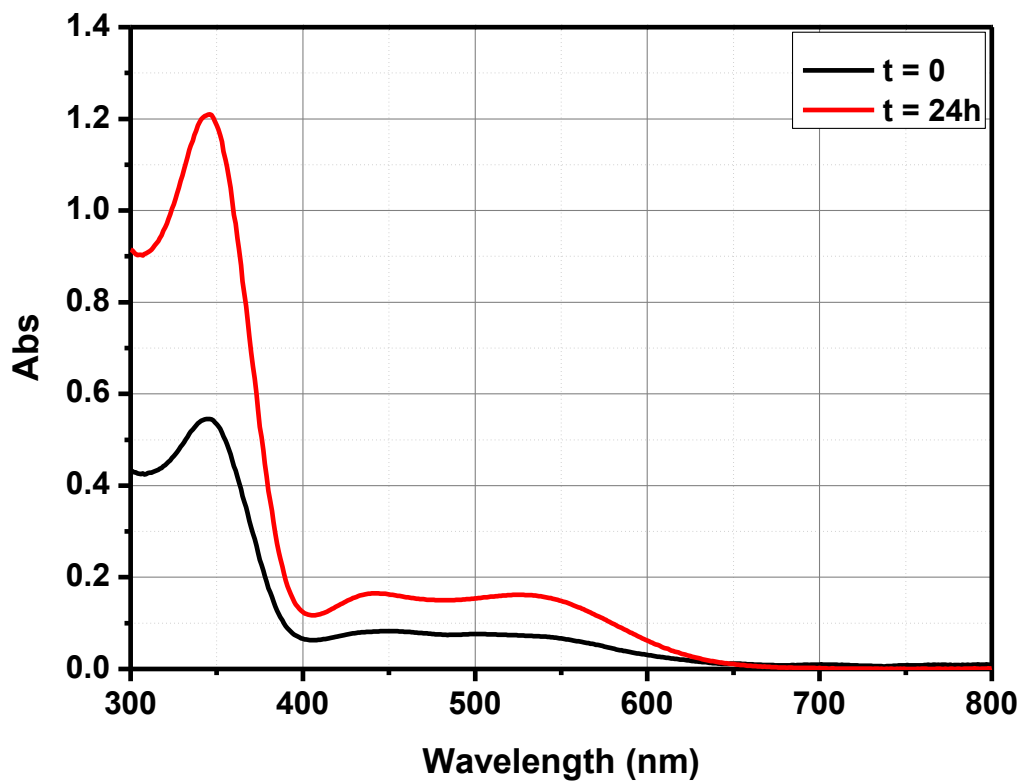



# $^1\text{H}$ and $^{13}\text{C}$ NMR spectra of the different dyes

## $^1\text{H}$ NMR spectrum of D-A0

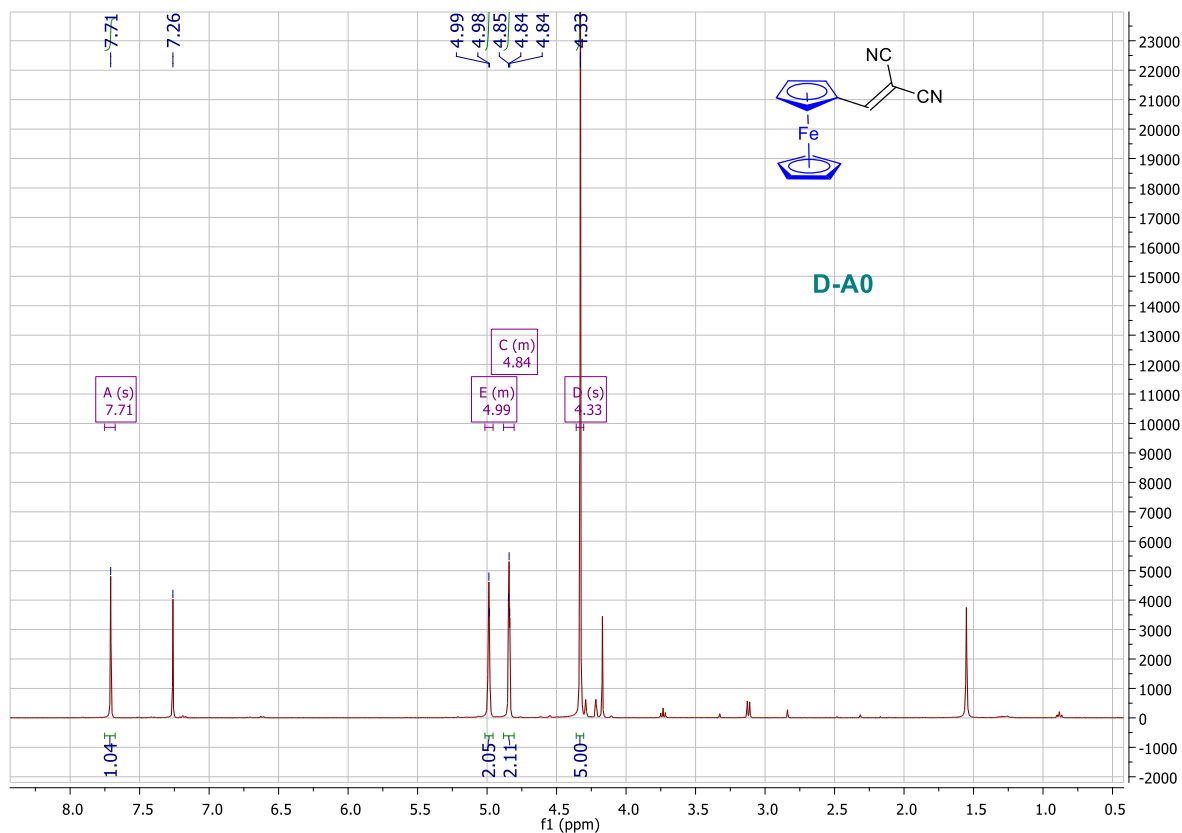

## $^{13}\text{C}$ NMR spectrum of D-A0

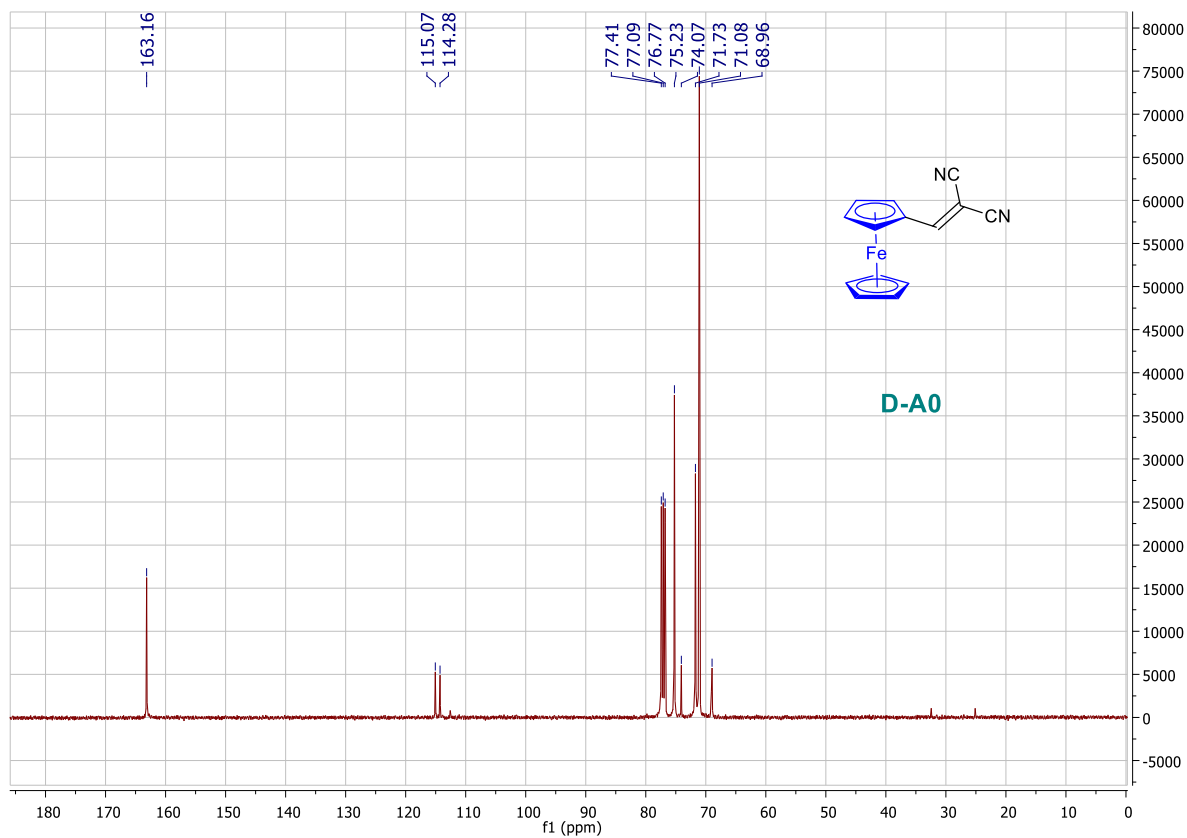

### <sup>1</sup>H NMR spectrum of D-A1

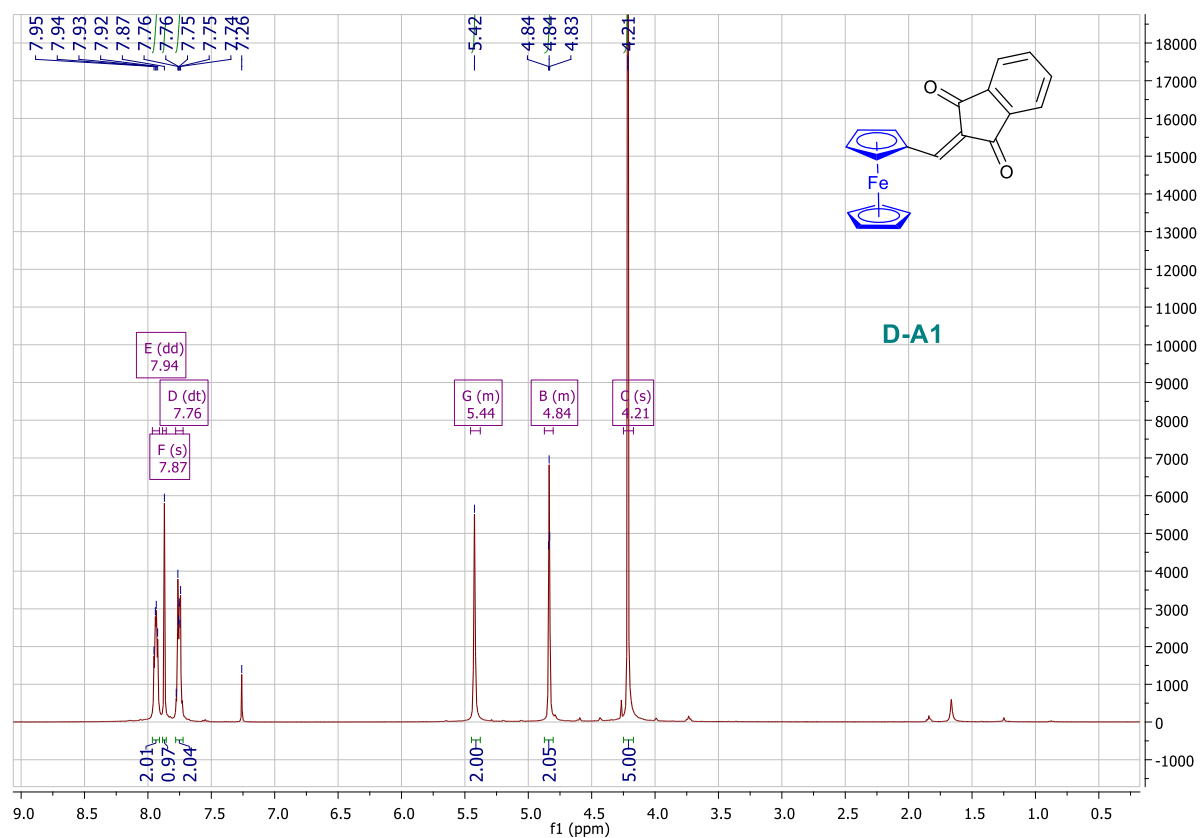

### <sup>13</sup>C NMR spectrum of D-A1

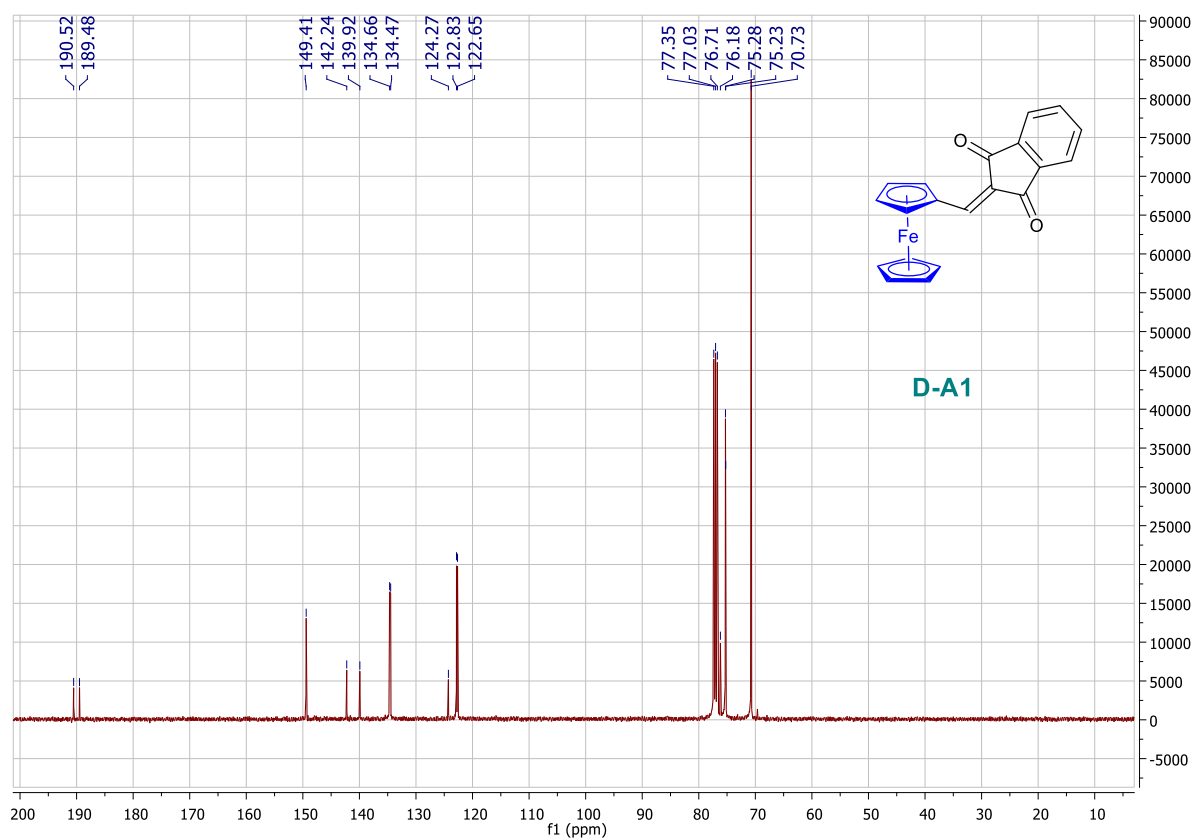

### <sup>1</sup>H NMR spectrum of D-A2

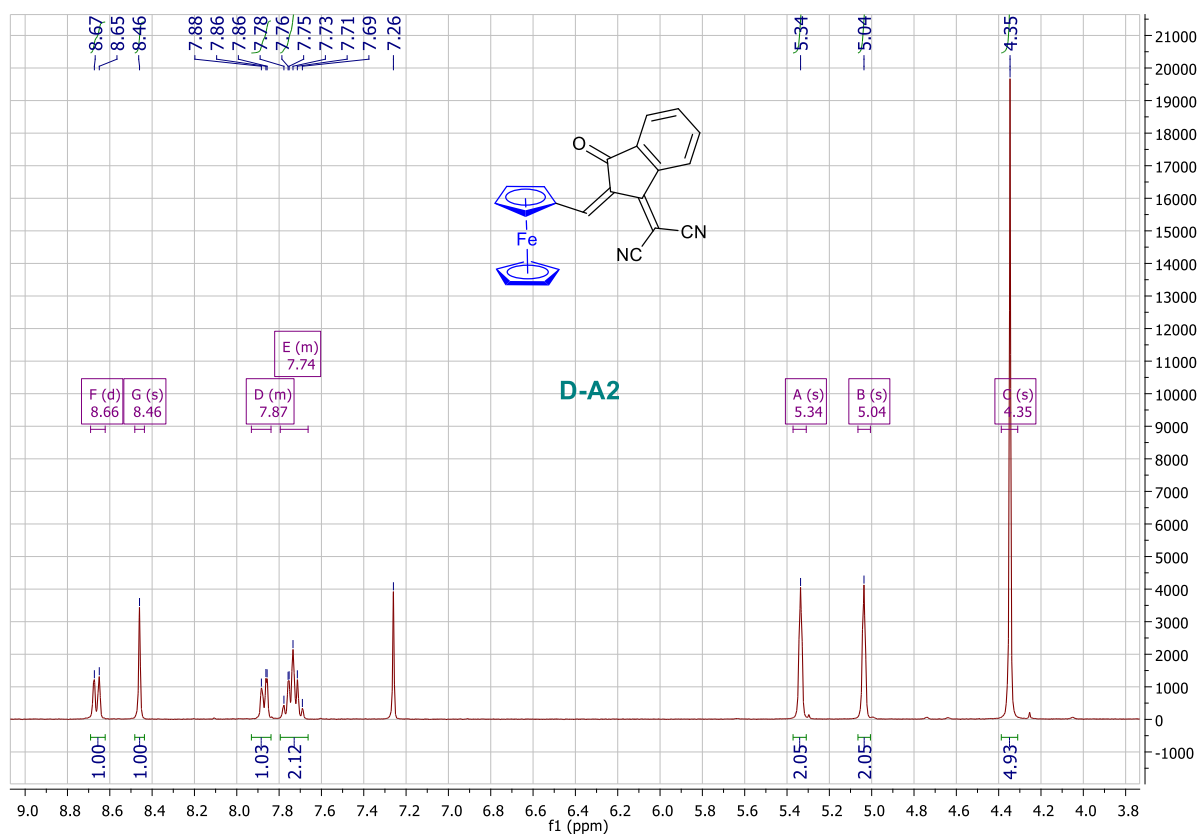

### <sup>13</sup>C NMR spectrum of D-A2

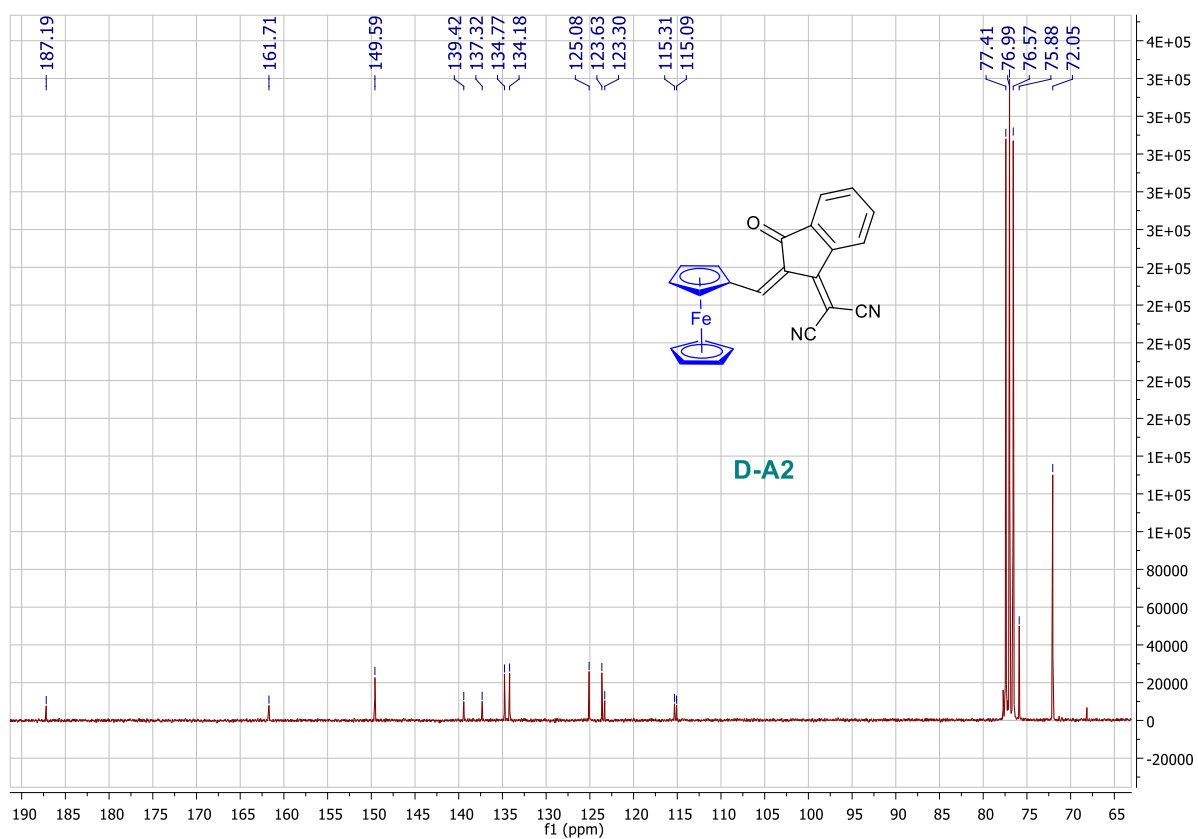

<sup>1</sup>H NMR spectrum of D-A3

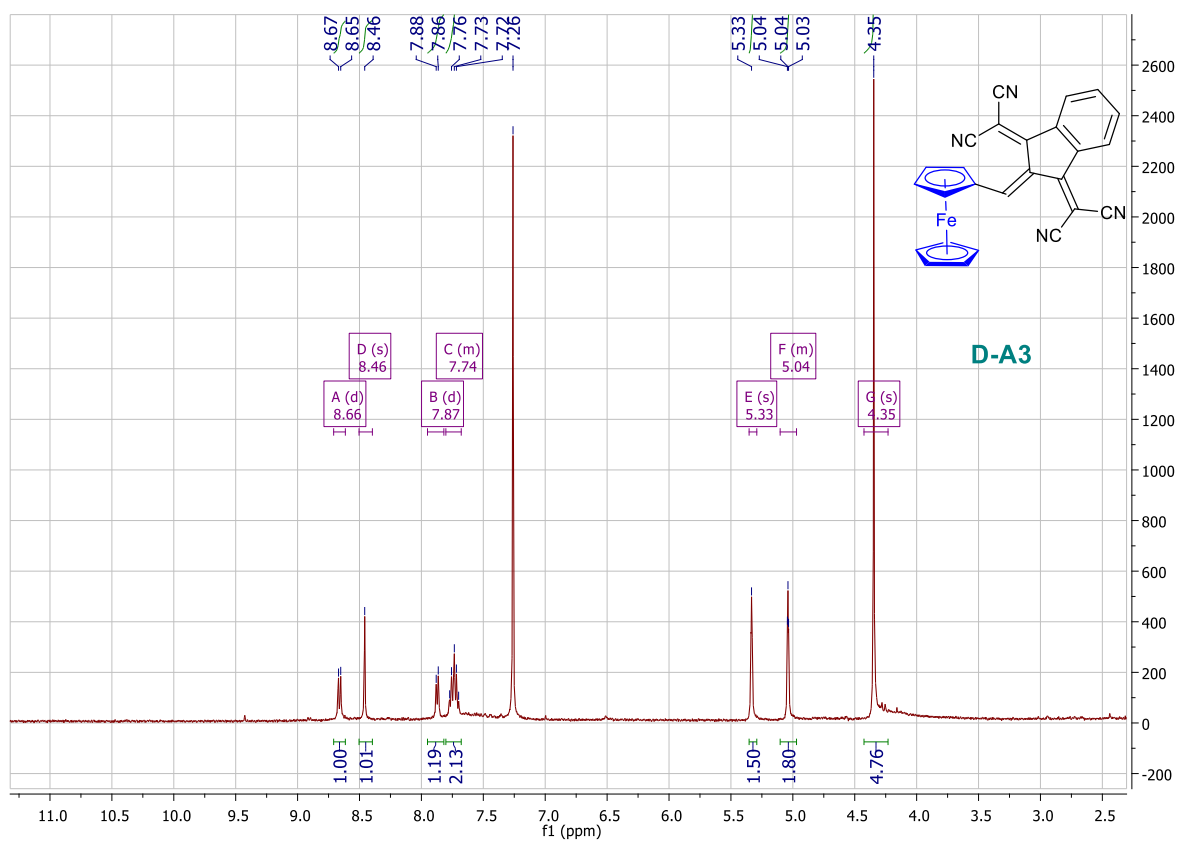

<sup>13</sup>C NMR spectrum of D-A3

**NOT SUFFICIENTLY SOLUBLE**

### <sup>1</sup>H NMR spectrum of D-A4

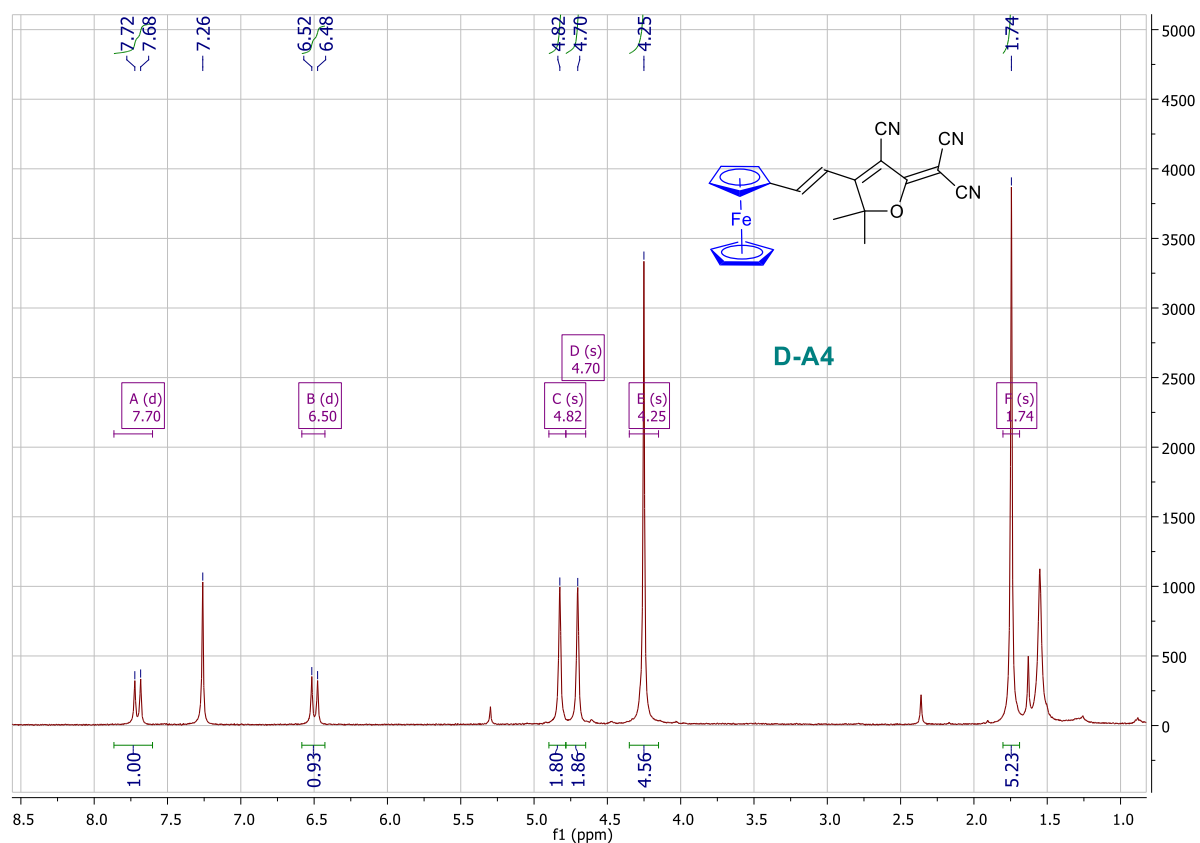

### <sup>13</sup>C NMR spectrum of D-A4

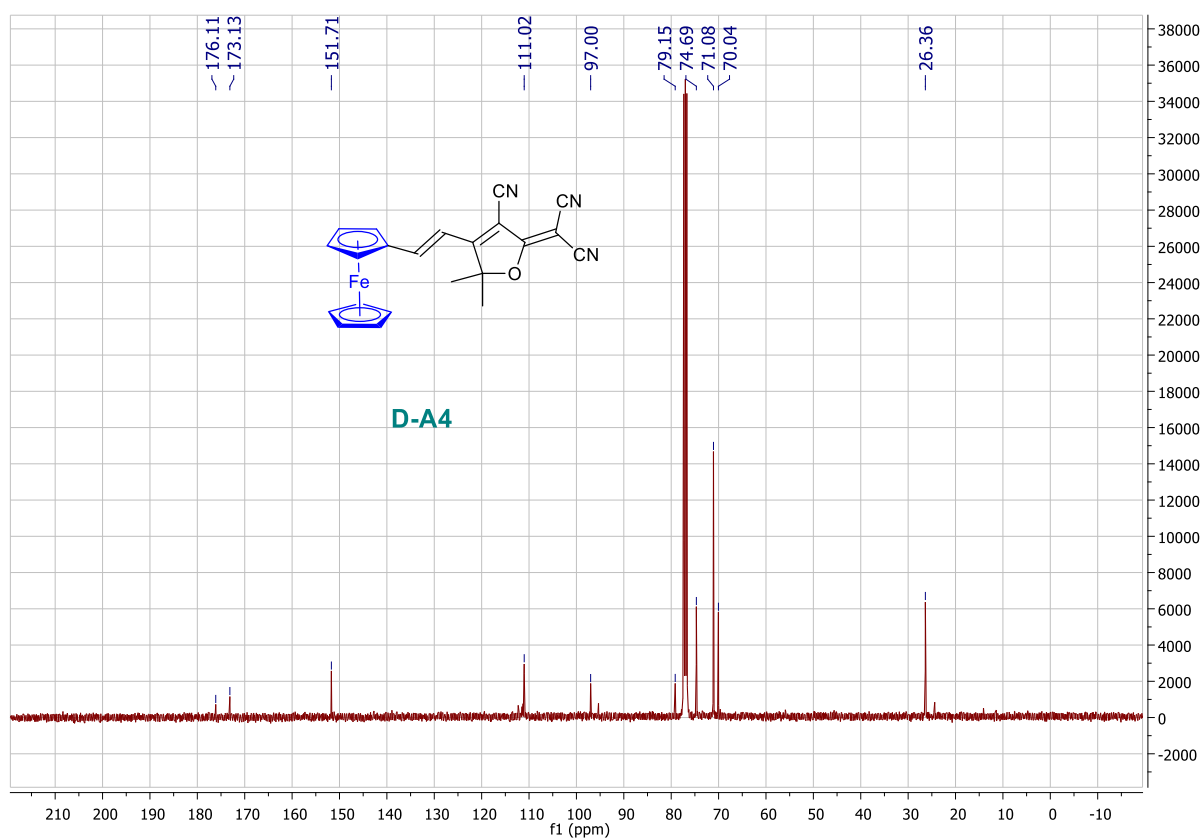

<sup>1</sup>H NMR spectrum of D-A5

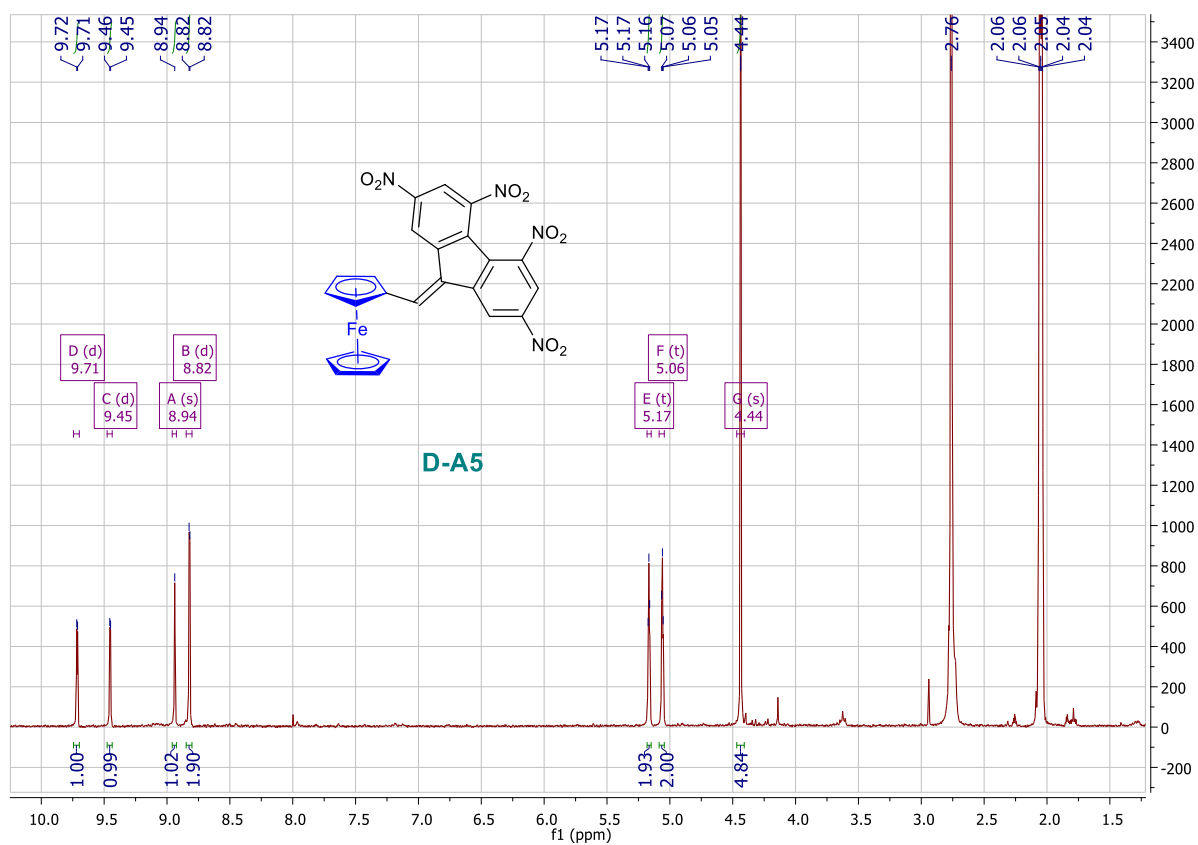

<sup>13</sup>C NMR spectrum of D-A5

**NOT SUFFICIENTLY SOLUBLE**

$^1\text{H}$  NMR spectrum of **D-A6**

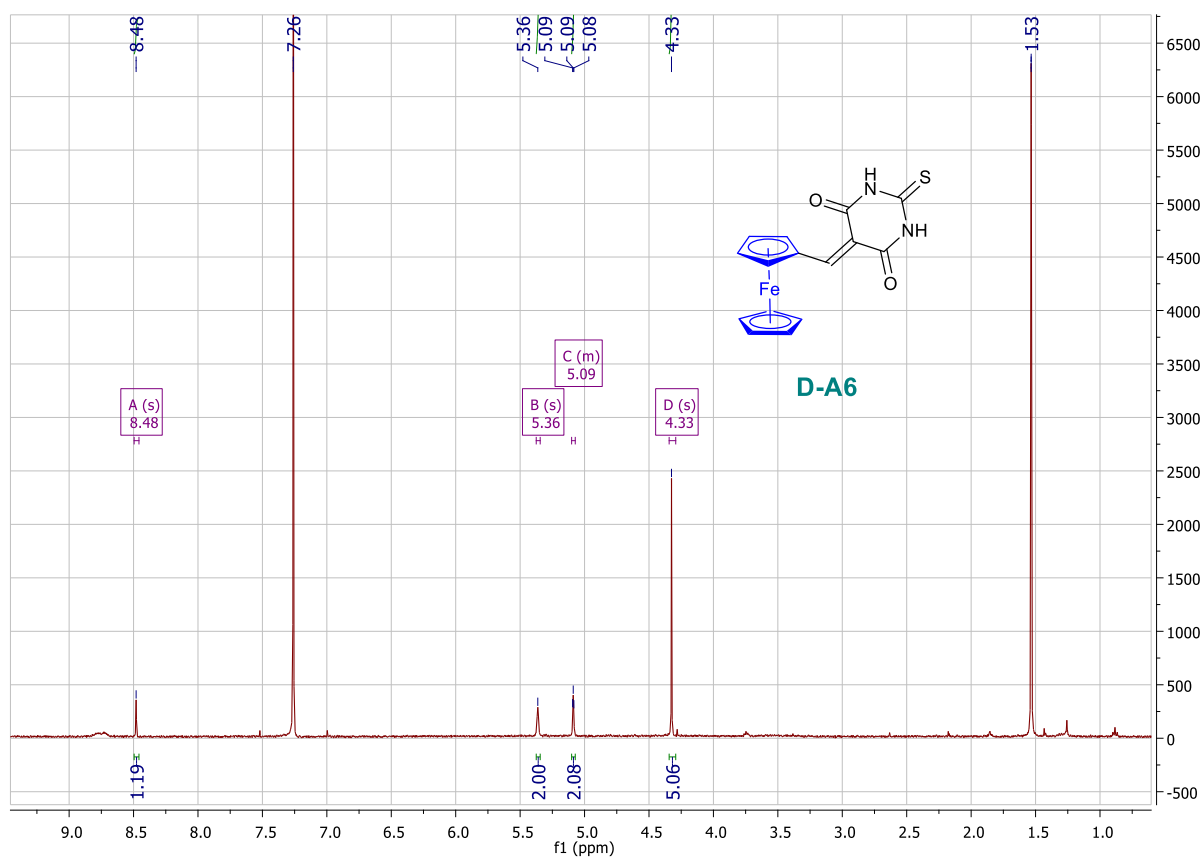

$^{13}\text{C}$  NMR spectrum of **D-A6**

**NOT SUFFICIENTLY SOLUBLE**

$^1\text{H}$  NMR spectrum of D-A7

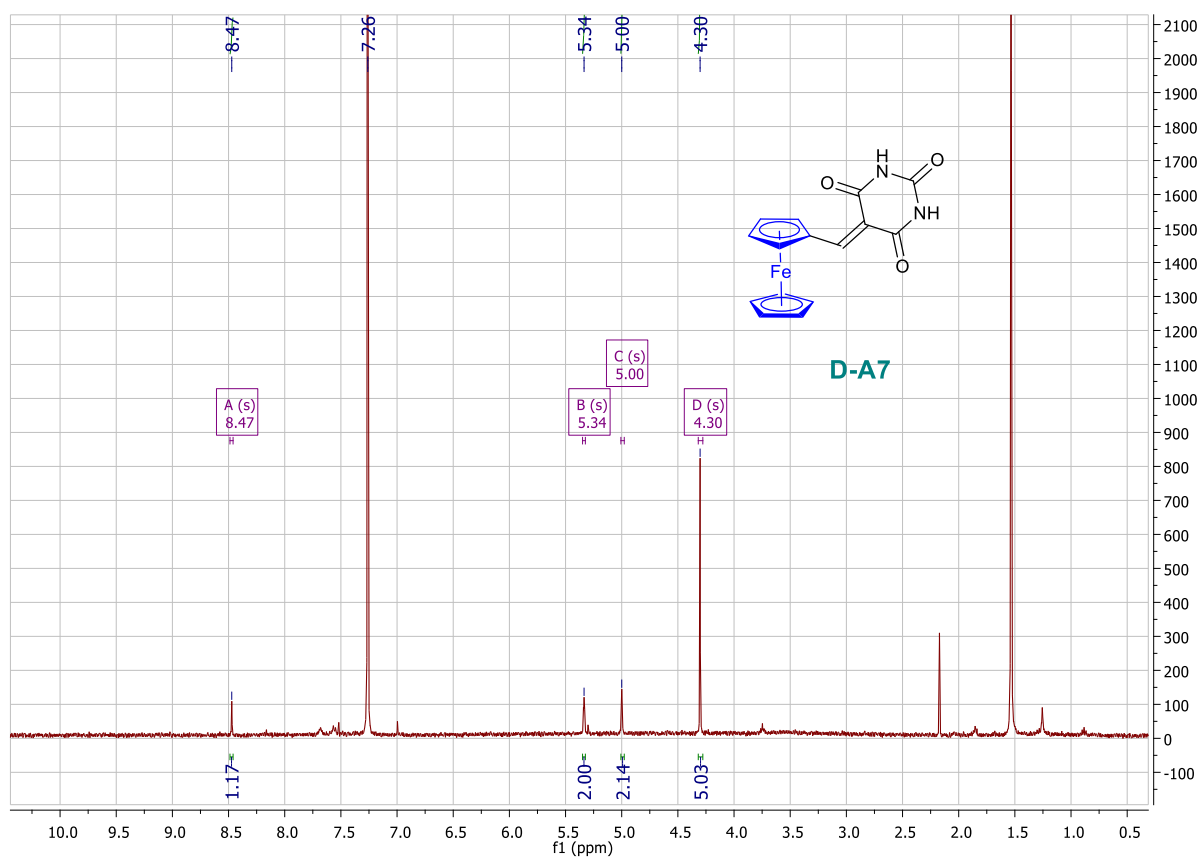

$^{13}\text{C}$  NMR spectrum of D-A7

**NOT SUFFICIENTLY SOLUBLE**



<sup>1</sup>H NMR spectrum of D-A8

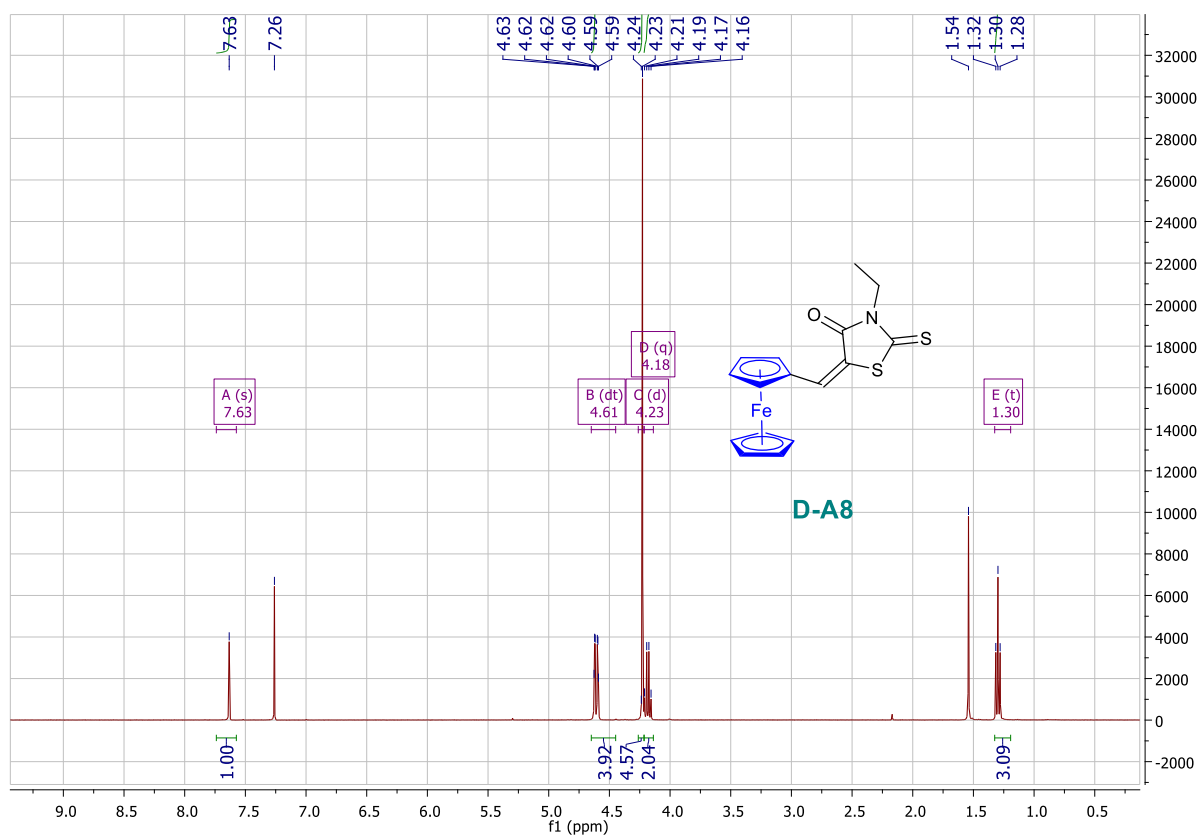

<sup>13</sup>C NMR spectrum of D-A8

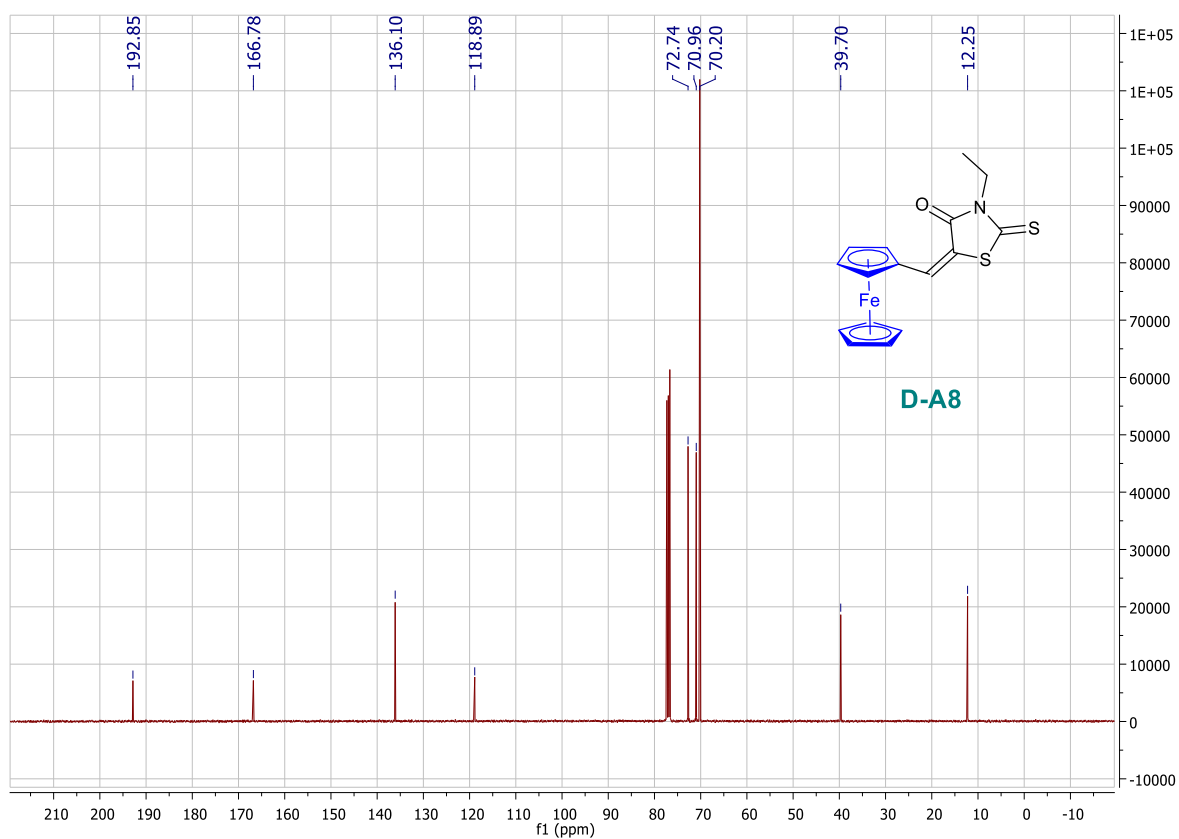

### <sup>1</sup>H NMR spectrum of D-A9

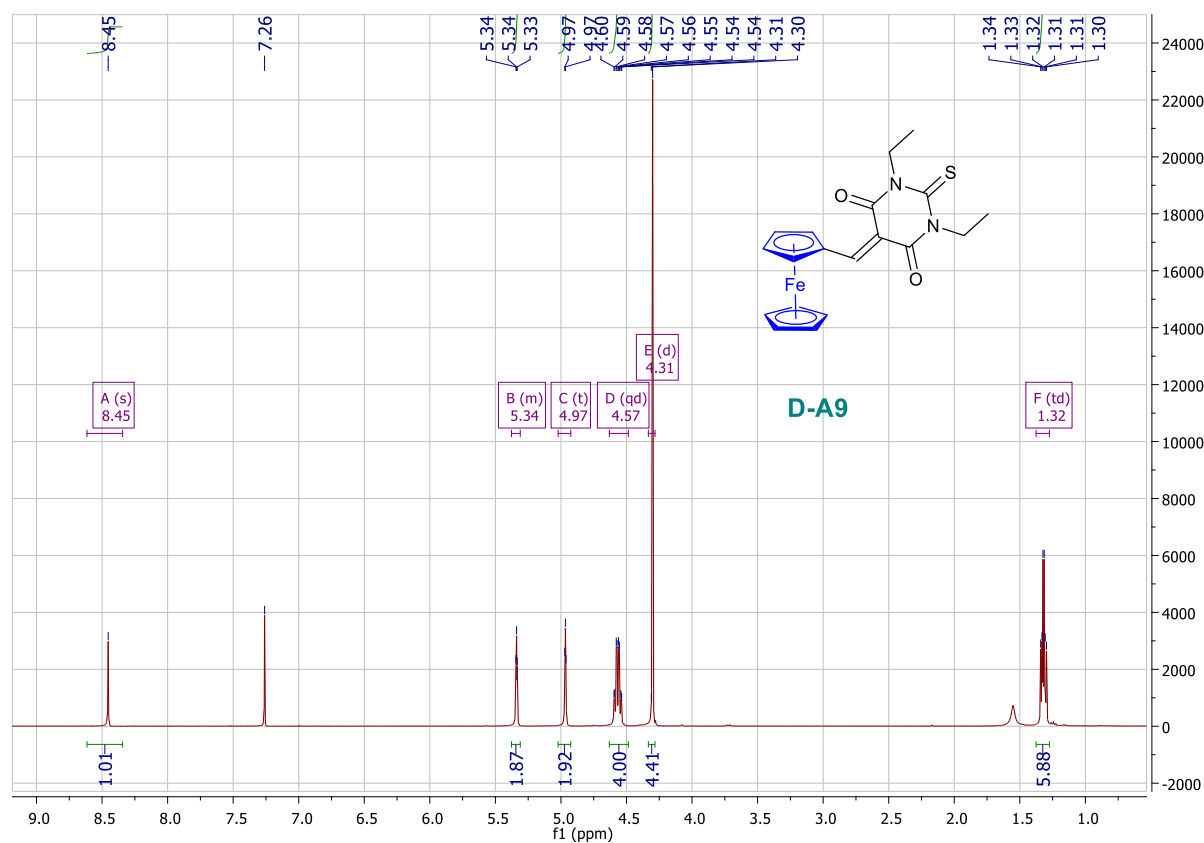

### <sup>13</sup>C NMR spectrum of D-A9

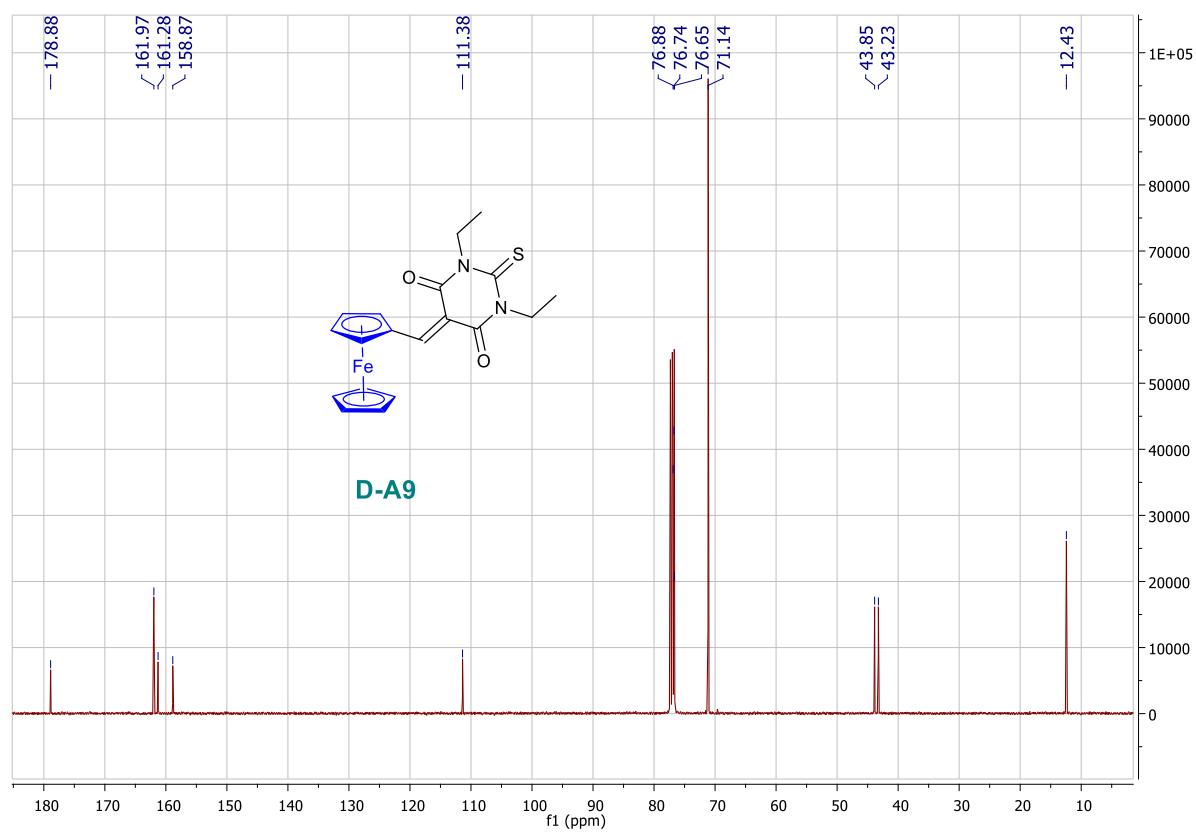

### $^1\text{H}$ NMR spectrum of D-A10

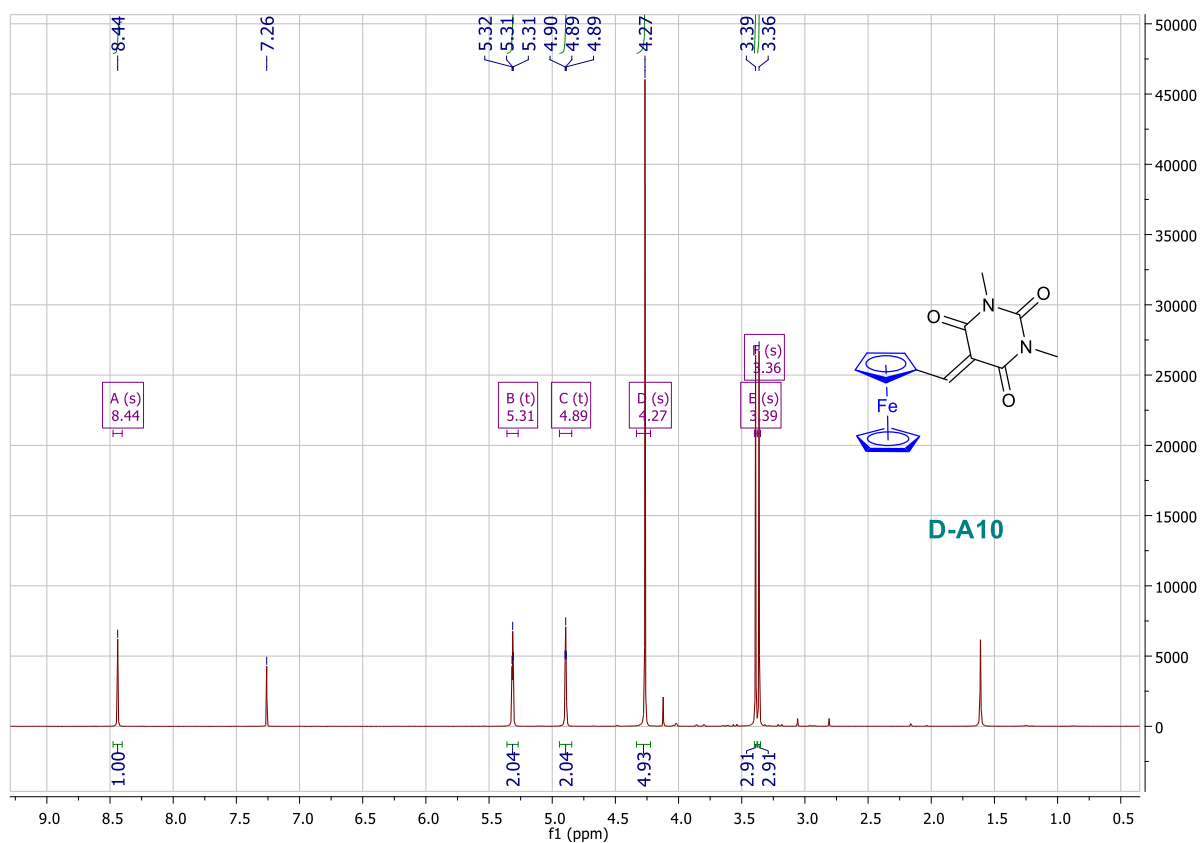

### $^{13}\text{C}$ NMR spectrum of D-A10

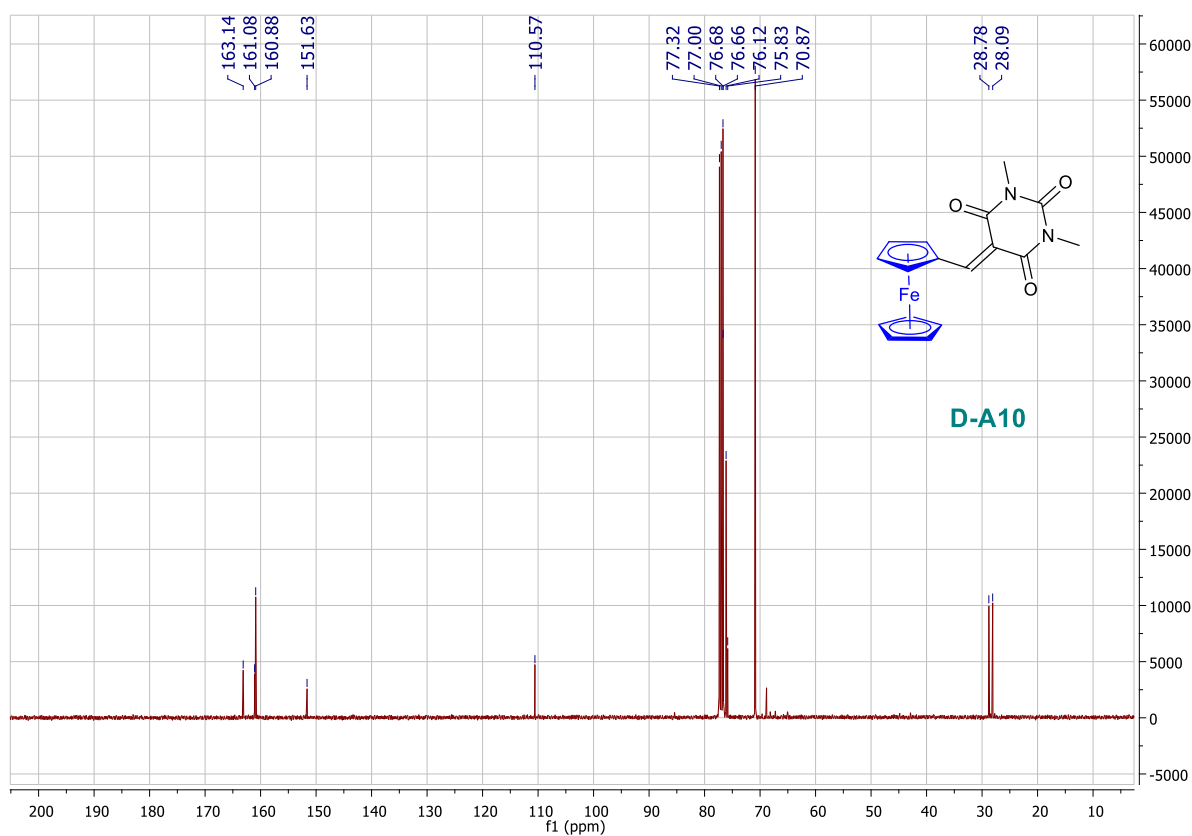

### <sup>1</sup>H NMR spectrum of D-A11

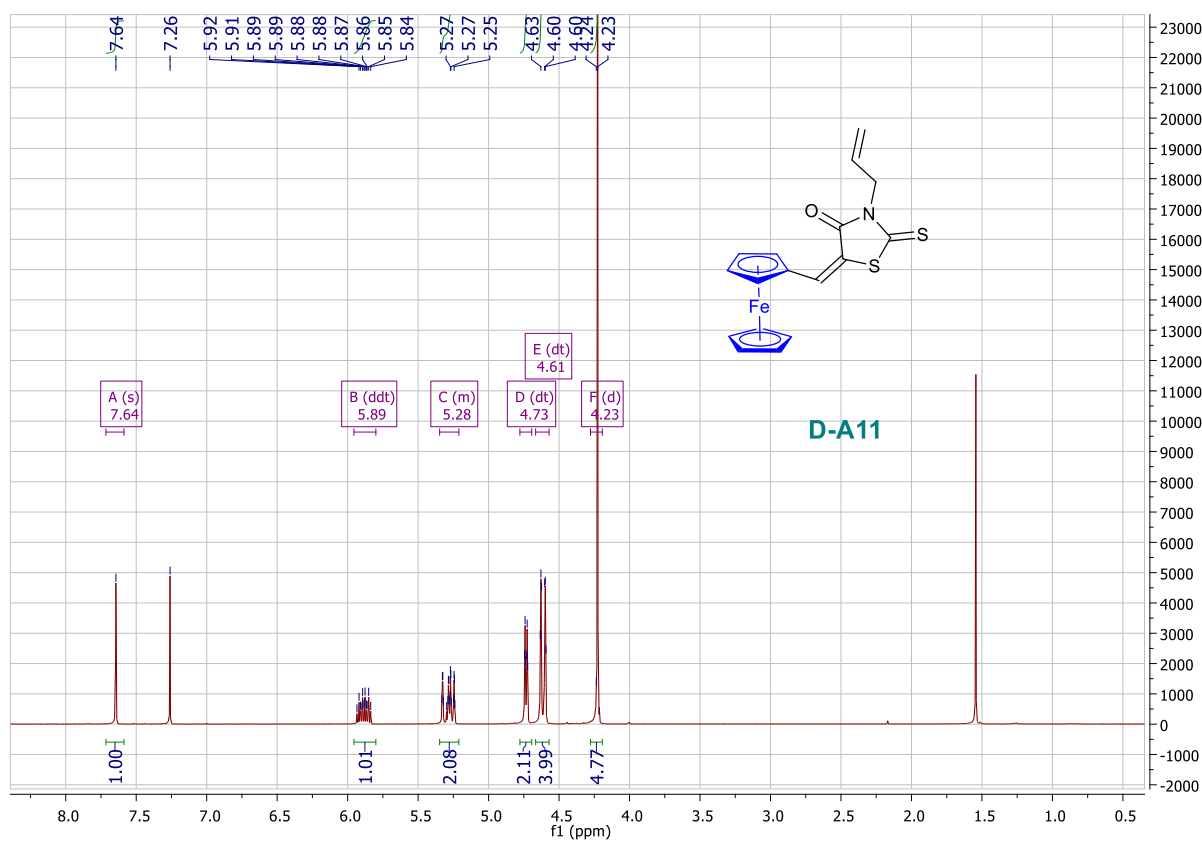

### <sup>13</sup>C NMR spectrum of D-A11

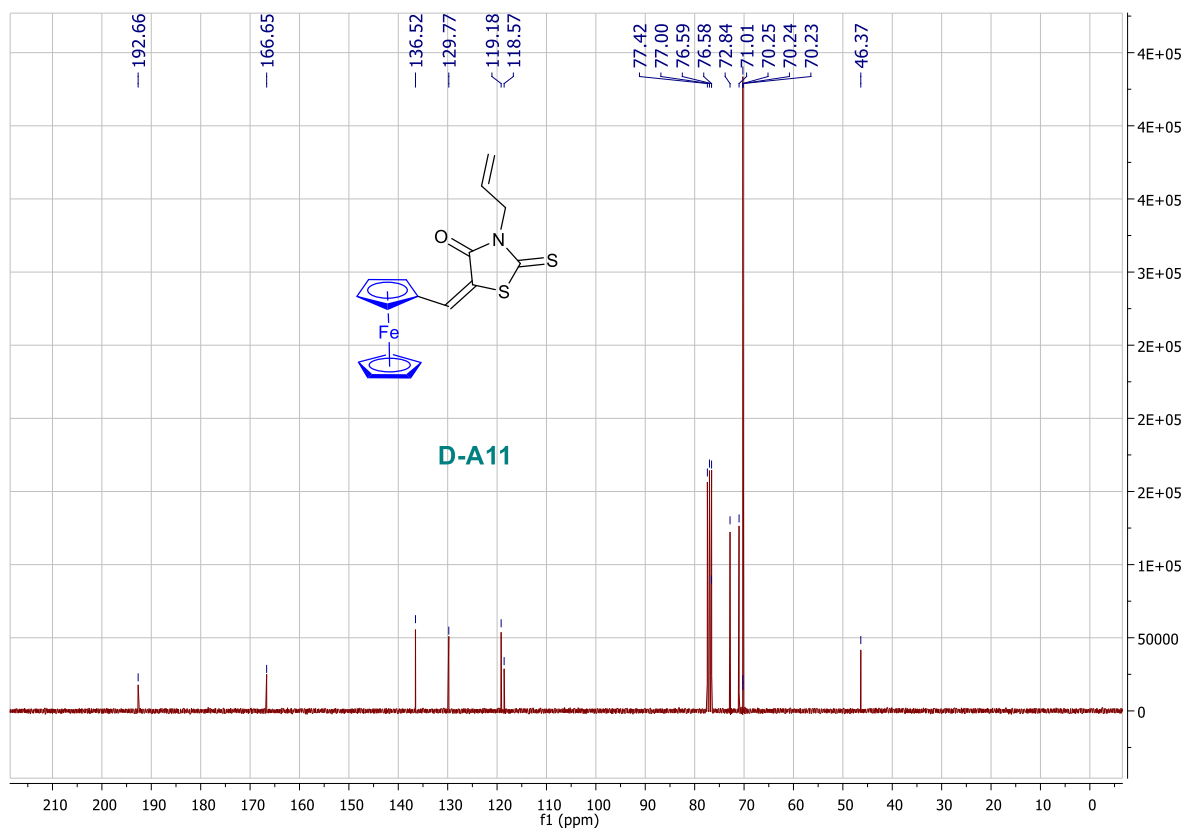

<sup>1</sup>H NMR spectrum of A-D-A0

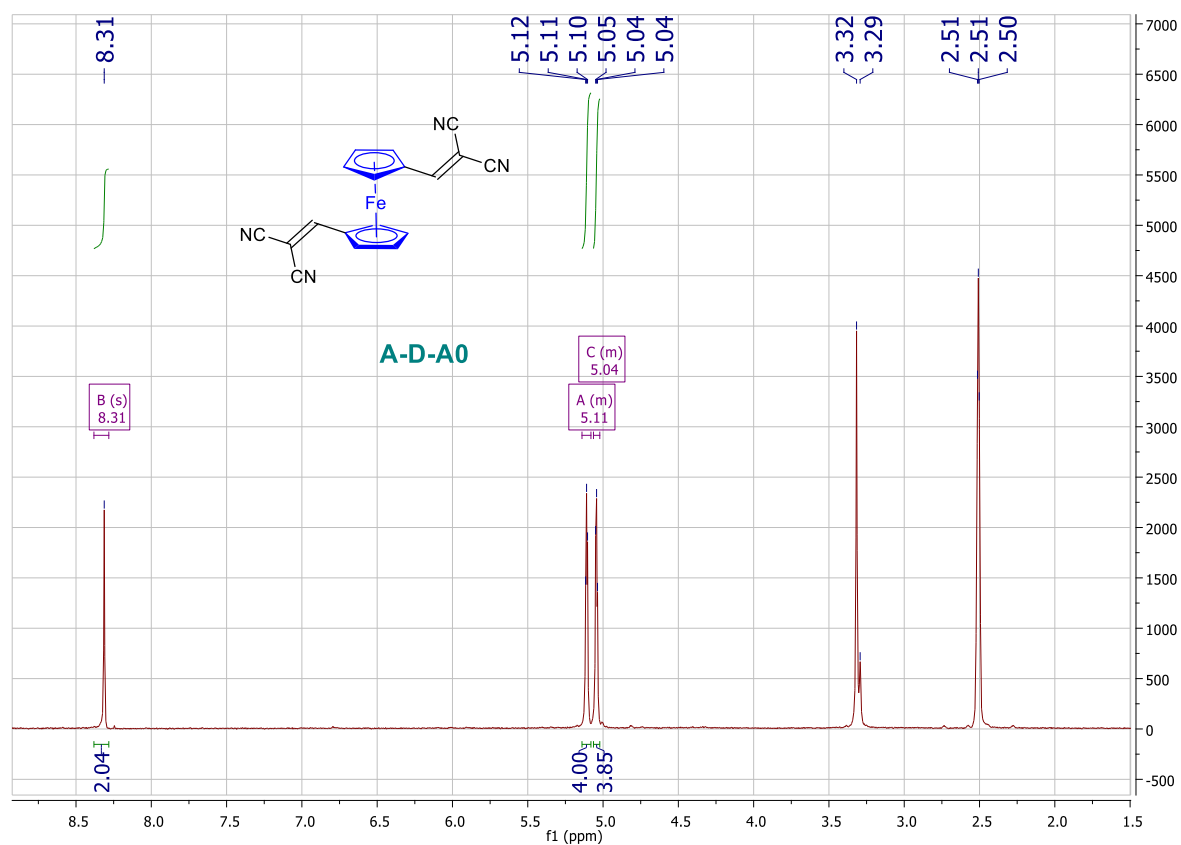

<sup>13</sup>C NMR spectrum of A-D-A0

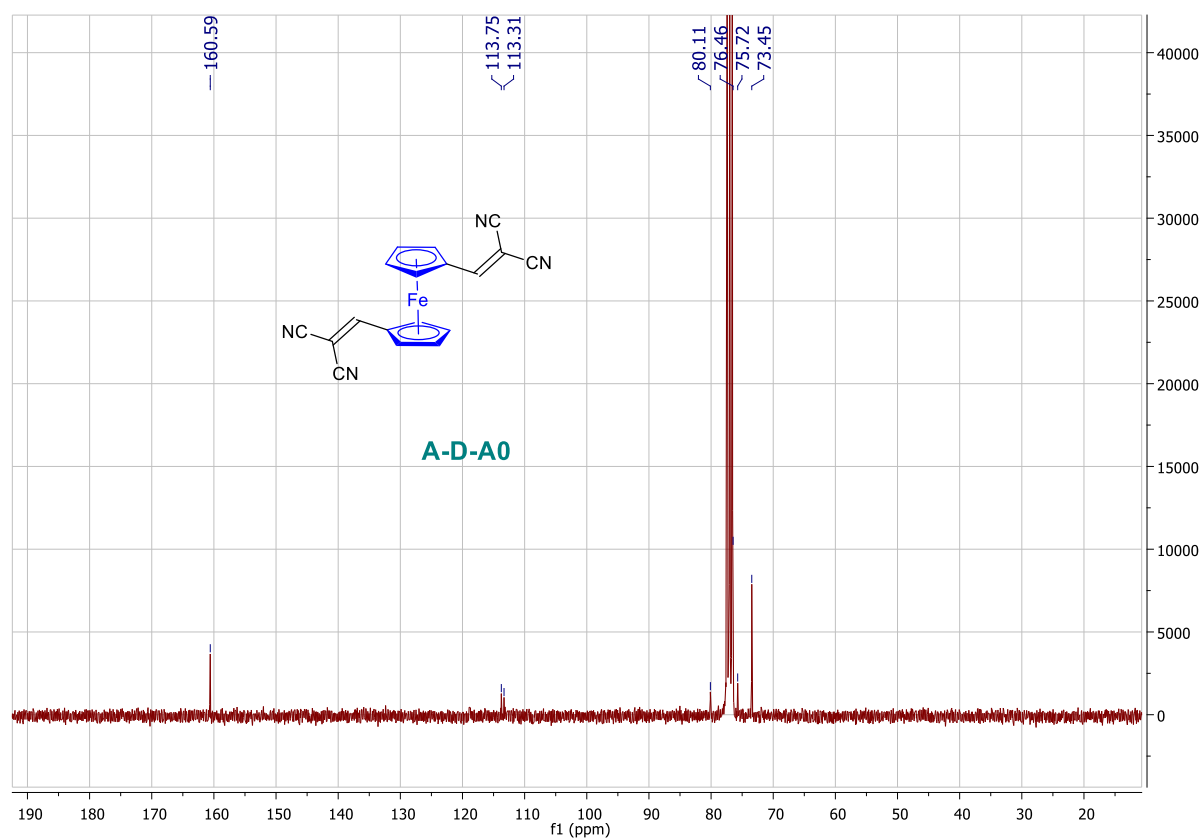

### <sup>1</sup>H NMR spectrum of A-D-A1

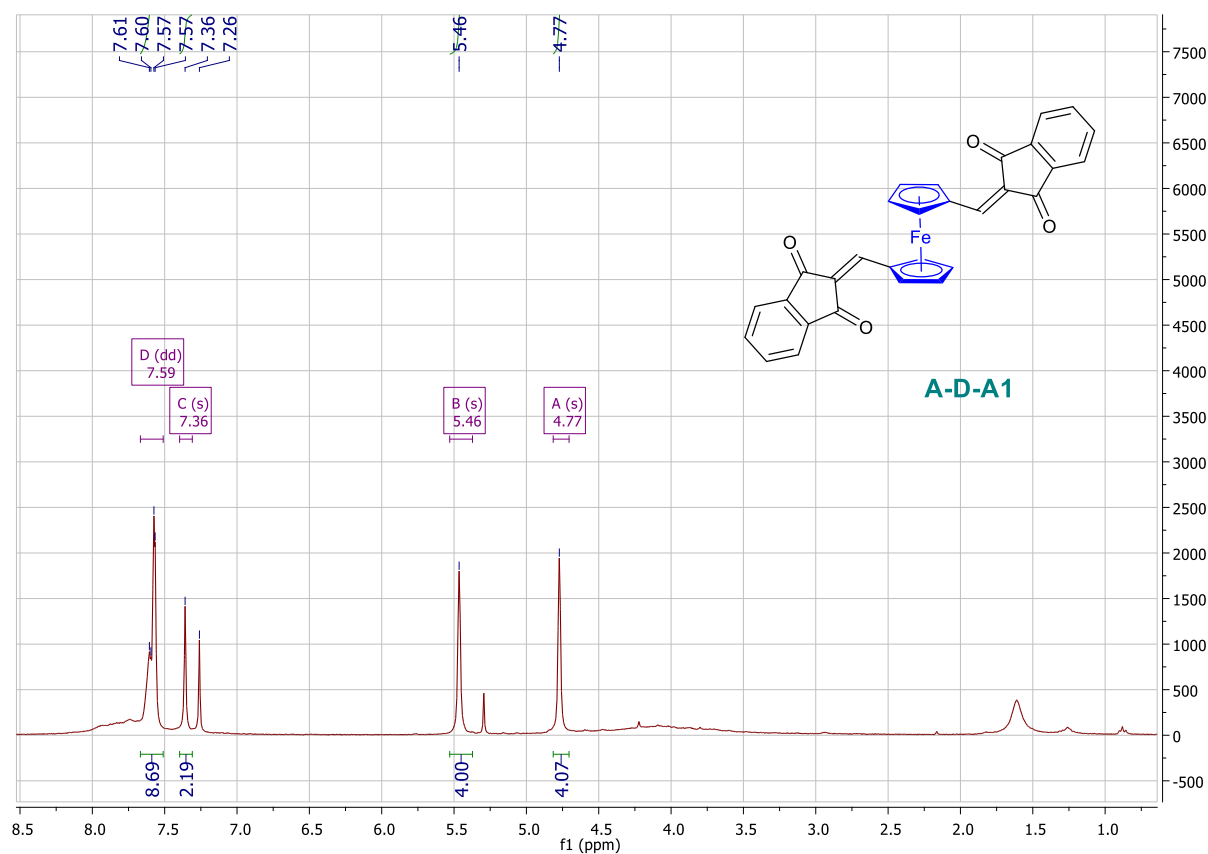

### <sup>13</sup>C NMR spectrum of A-D-A1

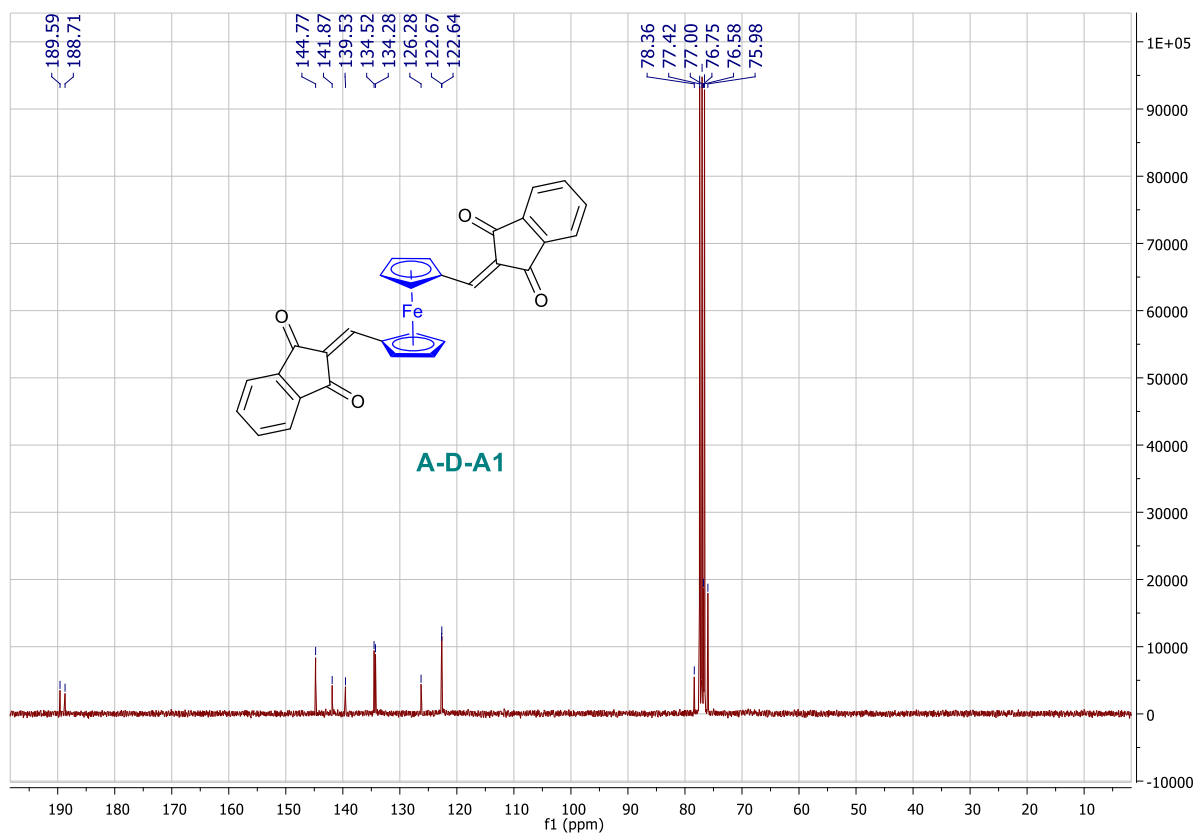

$^1\text{H}$  NMR spectrum of **A-D-A2**

**NOT SUFFICIENTLY SOLUBLE**

$^{13}\text{C}$  NMR spectrum of **A-D-A2**

**NOT SUFFICIENTLY SOLUBLE**

$^1\text{H}$  NMR spectrum of **A-D-A3**

**NOT SUFFICIENTLY SOLUBLE**

$^{13}\text{C}$  NMR spectrum of **A-D-A3**

**NOT SUFFICIENTLY SOLUBLE**

$^1\text{H}$  NMR spectrum of **A-D-A4**

**NOT SUFFICIENTLY SOLUBLE**

$^{13}\text{C}$  NMR spectrum of **A-D-A4**

**NOT SUFFICIENTLY SOLUBLE**

$^1\text{H}$  NMR spectrum of A-D-A5

**NOT SUFFICIENTLY SOLUBLE**

$^{13}\text{C}$  NMR spectrum of A-D-A5

**NOT SUFFICIENTLY SOLUBLE**

$^1\text{H}$  NMR spectrum of A-D-A6

**NOT SUFFICIENTLY SOLUBLE**

$^{13}\text{C}$  NMR spectrum of A-D-A6

**NOT SUFFICIENTLY SOLUBLE**

$^1\text{H}$  NMR spectrum of A-D-A7

**NOT SUFFICIENTLY SOLUBLE**

$^{13}\text{C}$  NMR spectrum of A-D-A7

**NOT SUFFICIENTLY SOLUBLE**



### <sup>1</sup>H NMR spectrum of A-D-A8

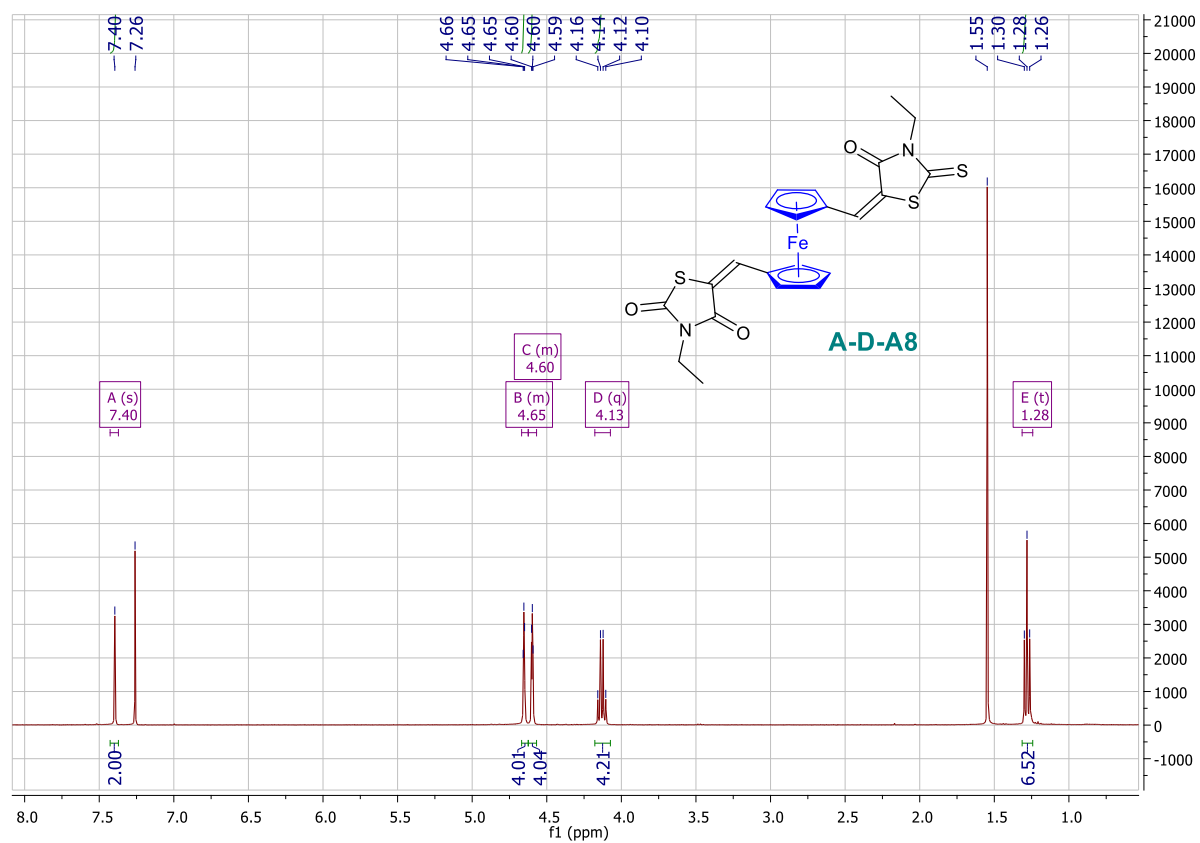

### <sup>13</sup>C NMR spectrum of A-D-A8

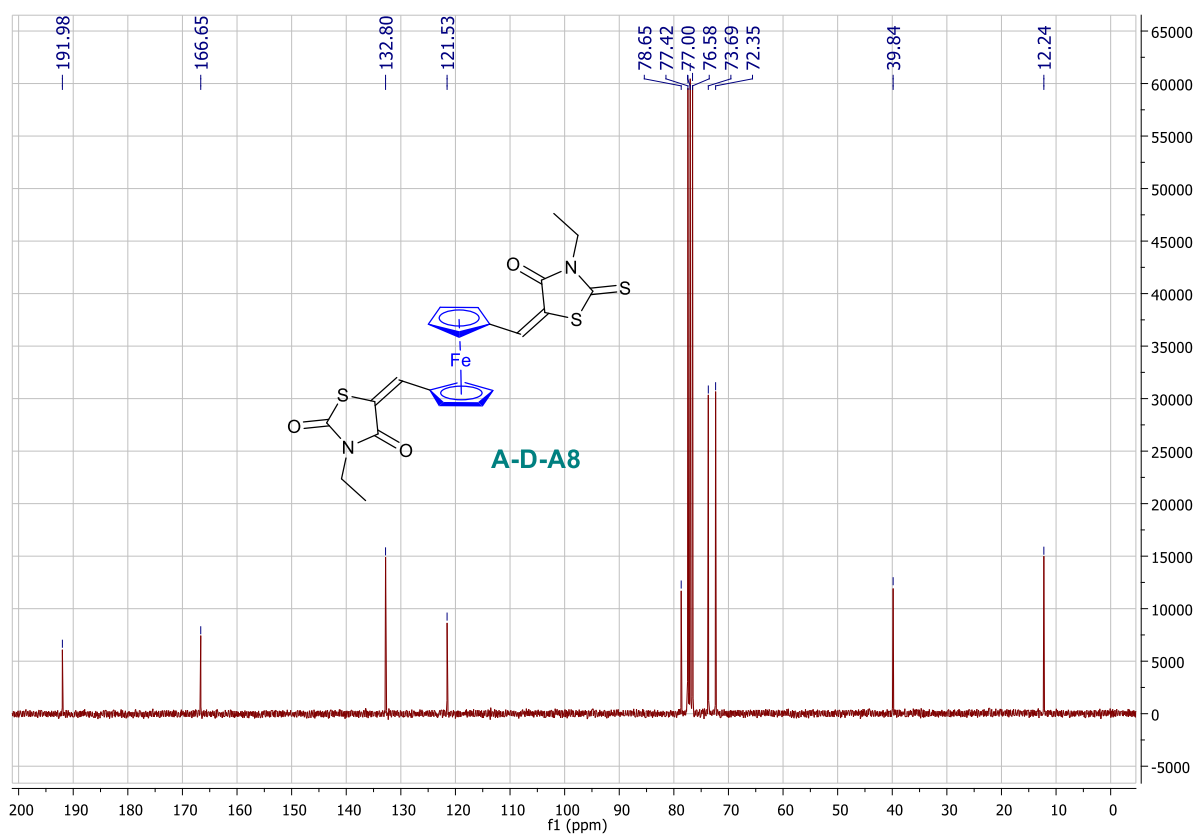

### <sup>1</sup>H NMR spectrum of A-D-A9

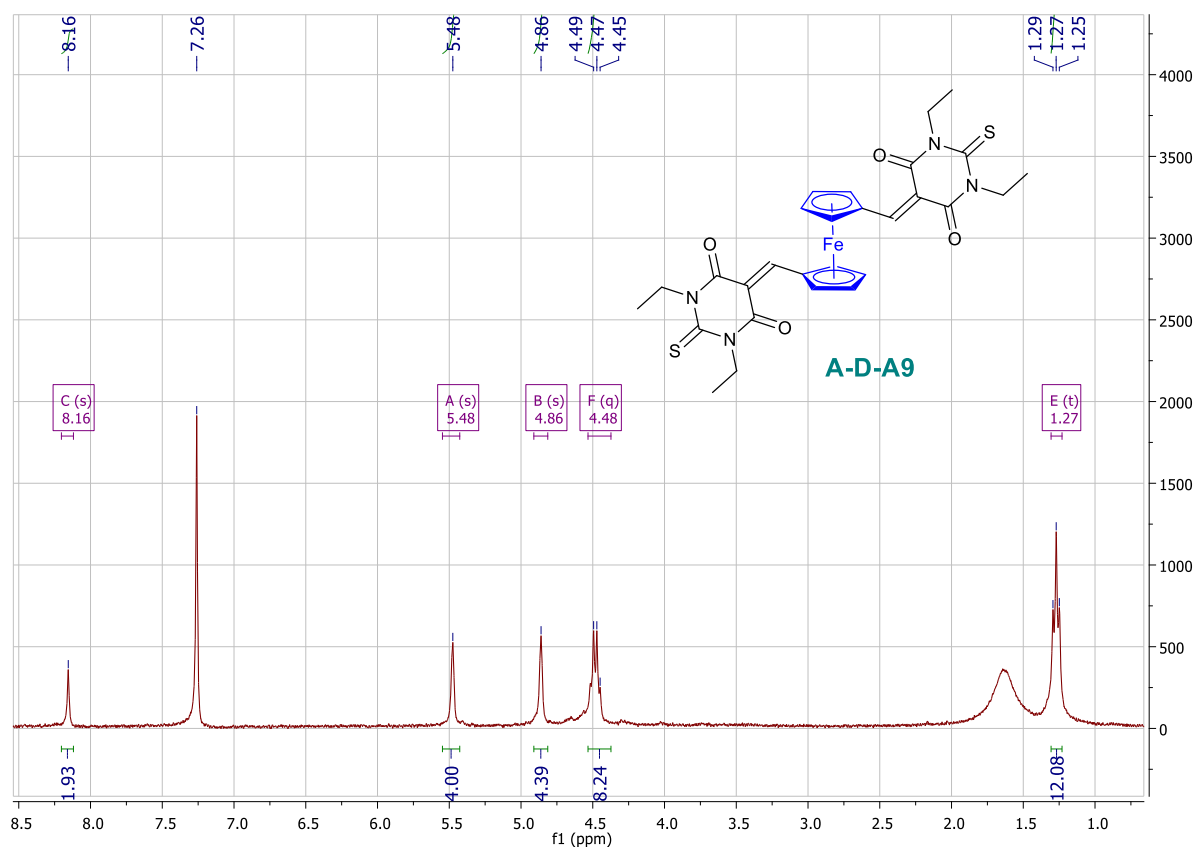

### <sup>13</sup>C NMR spectrum of A-D-A9

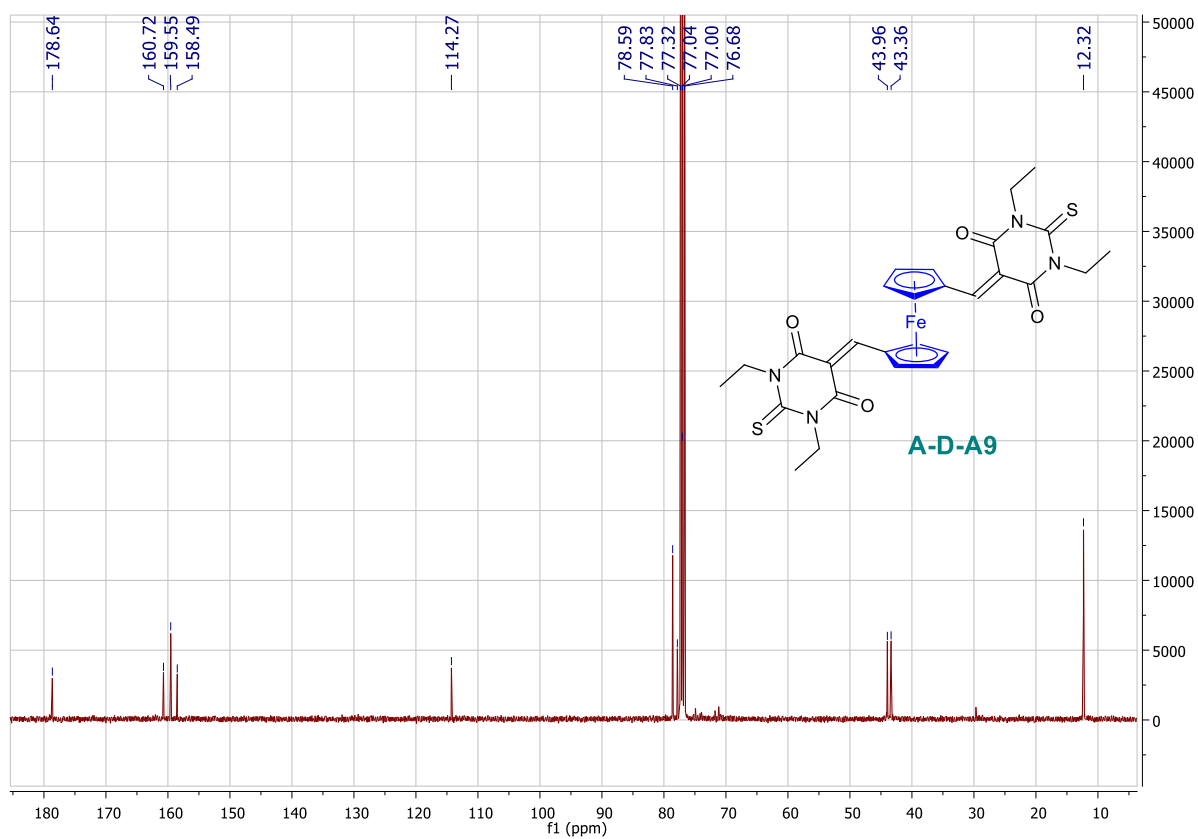

<sup>1</sup>H NMR spectrum of A-D-A10

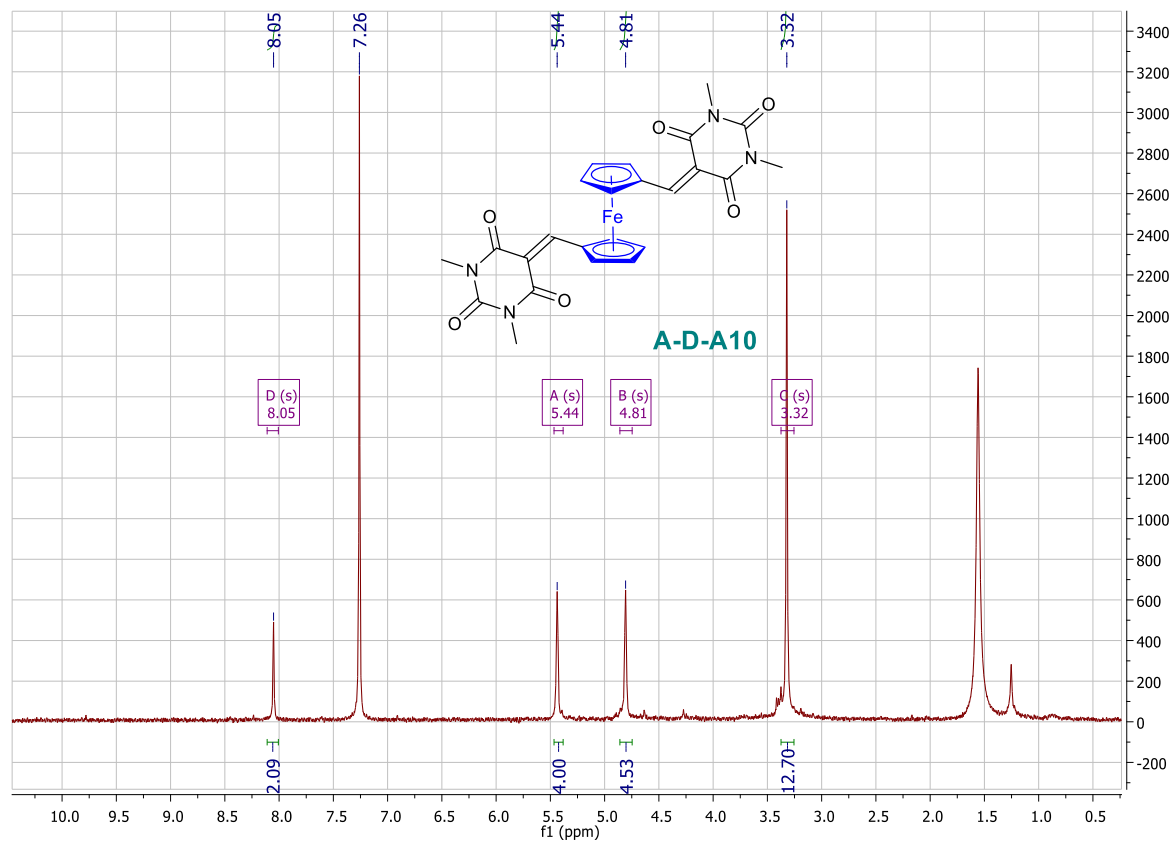

<sup>13</sup>C NMR spectrum of A-D-A10

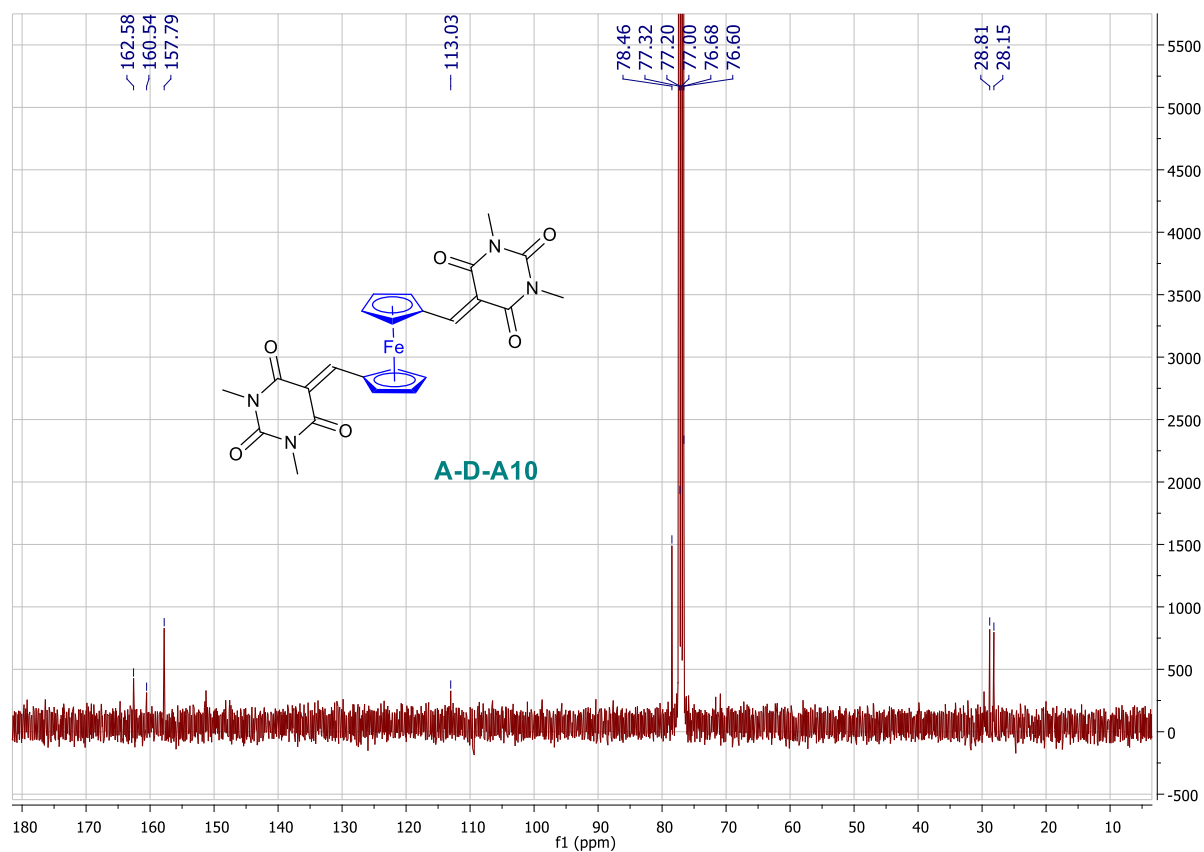

### <sup>1</sup>H NMR spectrum of A-D-A11

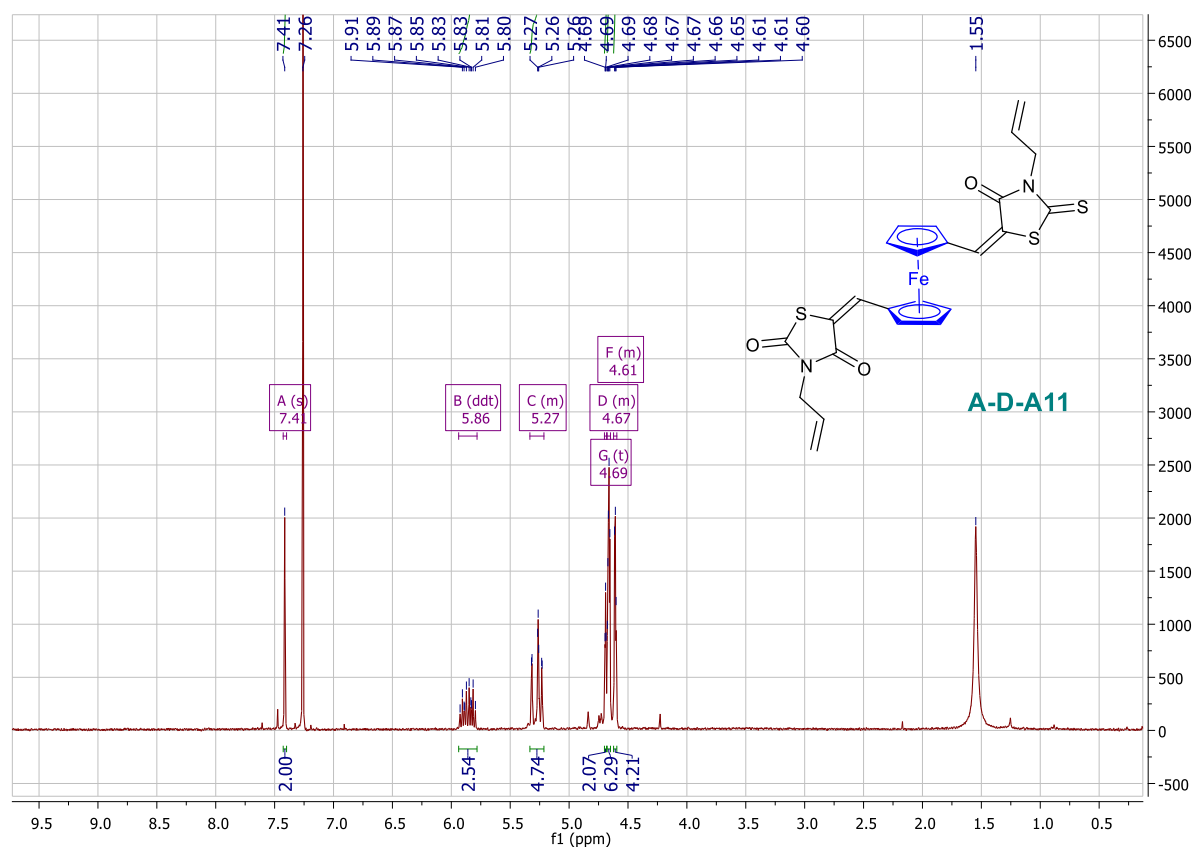

### <sup>13</sup>C NMR spectrum of A-D-A11

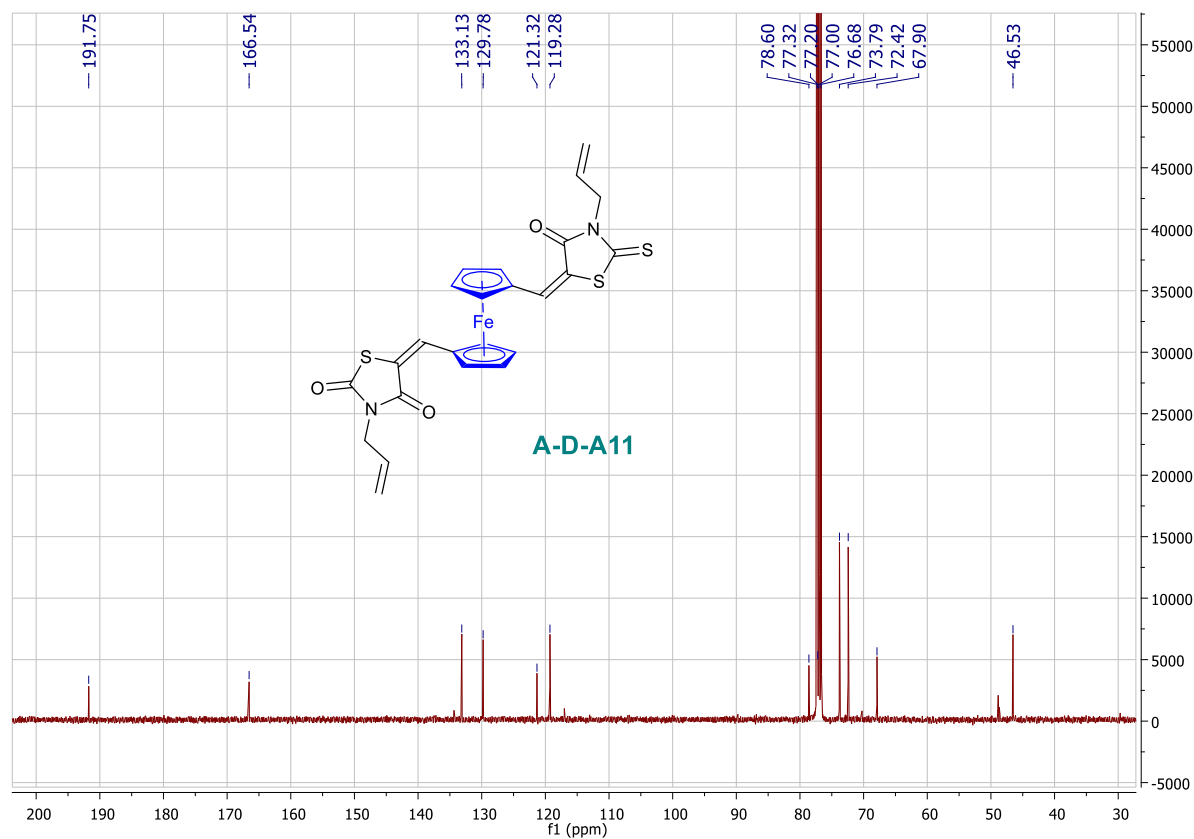

Supplement: d1nj01680f1.pdf [file d1nj01680f1.pdf]
